# Supplementary material for: Functional Analysis and RNA Sequencing Indicate the Regulatory Role of Argonaute1 in Tomato Compound Leaf Development
Source: PLoS One. 2015 Oct 19;10(10):e0140756. doi: 10.1371/journal.pone.0140756 (PMC4610667; doi:10.1371/journal.pone.0140756)
Supplement: S1 Table — (XLSX) [file pone.0140756.s004.xlsx]

## Sheet: upregulated
Supplementary Table S1. Differentially expressed genes (DEseq)
id	baseMean (LF)	baseMean (AG)	log2FoldChange（AG/LF）	p-value	padj	KEGG.Orthology	GO.Component	GO.Function	GO.Process	Blast.nr
Solyc07g006380	2.6041	212.024	6.3473	3.34e-23	1.06e-19	-	-	-	GO:0006952//defense response;GO:0051704	gi|924624|gb|AAA80496.1|/1.77908e-55/flower-specific gamma-thionin-like protein/acidic protein precursor [Solanum lycopersicum]
Solyc03g098710	3.0823	229.984	6.22138	8.58e-24	3.17e-20	-	-	-	-	gi|460379482|ref|XP_004235491.1|/2.03046e-128/PREDICTED: cysteine protease inhibitor 8-like [Solanum lycopersicum]
Solyc08g078940	2.12589	102.512	5.59159	4.76e-14	2.58e-11	-	-	-	-	gi|460400449|ref|XP_004245747.1|/1.02432e-79/PREDICTED: 14 kDa proline-rich protein DC2.15-like [Solanum lycopersicum]
Solyc09g072700	11.1077	445.714	5.32649	1.48e-27	8.24e-24	K00430|1|1e-112|404|rcu:RCOM_1320850|peroxidase [EC:1.11.1.7]	GO:0009506//plasmodesma;GO:0009505//plant-type cell wall;GO:0005576//extracellular region;GO:0016020//membrane	GO:0005488//binding;GO:0004601//peroxidase activity	GO:0048767//root hair elongation;GO:0015706//nitrate transport;GO:0010106//cellular response to iron ion starvation;GO:0006826//iron ion transport;GO:0010167//response to nitrate	gi|460404067|ref|XP_004247506.1|/0/PREDICTED: peroxidase 44-like isoform 1 [Solanum lycopersicum]
Solyc00g071180	16.4224	601.169	5.19403	2.2e-29	1.63e-25	-	-	GO:0004869//cysteine-type endopeptidase inhibitor activity	GO:0010466//negative regulation of peptidase activity	gi|460416117|ref|XP_004253396.1|/3.0292e-142/PREDICTED: multicystatin, partial [Solanum lycopersicum]
Solyc02g075620	1.06295	34.7878	5.03244	3.56e-06	0.000200187	K01051|1|9e-151|531|vvi:100854283|pectinesterase [EC:3.1.1.11]	GO:0016023//cytoplasmic membrane-bounded vesicle;GO:0005618//cell wall	GO:0030599//pectinesterase activity;GO:0045330	GO:0042545//cell wall modification	gi|255581396|ref|XP_002531506.1|/5.60615e-155/Pectinesterase-2 precursor, putative [Ricinus communis]
Solyc09g089500	10.3123	255.824	4.63272	7.1e-20	8.75e-17	-	-	GO:0004867//serine-type endopeptidase inhibitor activity	GO:0009611//response to wounding	gi|460404445|ref|XP_004247693.1|/6.19784e-48/PREDICTED: ethylene-responsive proteinase inhibitor 1-like [Solanum lycopersicum]
Solyc02g070430	4.35832	108.09	4.63232	1.35e-12	4.77e-10	K04125|1|2e-123|440|pop:POPTR_758699|gibberellin 2-oxidase [EC:1.14.11.13]	-	GO:0016707//gibberellin 3-beta-dioxygenase activity;GO:0005506//iron ion binding	GO:0055114//oxidation-reduction process;GO:0009685//gibberellin metabolic process;GO:0009639//response to red or far red light	gi|460374662|ref|XP_004233129.1|/0/PREDICTED: gibberellin 2-beta-dioxygenase-like [Solanum lycopersicum]
Solyc01g066910	2.6041	63.4741	4.60731	7.93e-09	1.04e-06	-	-	-	-	gi|460366736|ref|XP_004229235.1|/7.57596e-54/PREDICTED: putative lipid-transfer protein DIR1-like [Solanum lycopersicum]
Solyc08g006850	1.54115	37.1791	4.59241	4.79e-06	0.000256139	-	-	-	-	gi|460397953|ref|XP_004244529.1|/0/PREDICTED: patatin group A-3-like [Solanum lycopersicum]
Solyc03g096540	3.18884	75.694	4.56908	6.69e-10	1.24e-07	-	-	-	-	gi|460379015|ref|XP_004235260.1|/2.06738e-105/PREDICTED: uncharacterized protein LOC101266493 isoform 1 [Solanum lycopersicum]
Solyc08g080620	162.628	3821.79	4.5546	3.95e-32	8.78e-28	-	-	-	-	gi|350534816|ref|NP_001234161.1|/5.60871e-142/PR-5x precursor [Solanum lycopersicum]
Solyc08g075570	6.74935	157.043	4.54027	5.46e-15	3.91e-12	-	GO:0005886//plasma membrane;GO:0016021//integral to membrane	GO:0015370//solute:sodium symporter activity;GO:0015204//urea transmembrane transporter activity	GO:0071918//urea transmembrane transport;GO:0035725//sodium ion transmembrane transport;GO:0006995//cellular response to nitrogen starvation	gi|460400962|ref|XP_004245999.1|/0/PREDICTED: urea-proton symporter DUR3-like [Solanum lycopersicum]
Solyc07g054310	18.3873	393.047	4.41792	3.13e-21	5.35e-18	-	-	-	-	gi|460395521|ref|XP_004243331.1|/9.70009e-62/PREDICTED: putative cell wall protein-like [Solanum lycopersicum]
Solyc05g007300	5.57986	108.078	4.27569	2.03e-11	5.3e-09	-	GO:0009506//plasmodesma;GO:0005634//nucleus	-	GO:0042538//hyperosmotic salinity response;GO:0042742//defense response to bacterium;GO:0009269//response to desiccation;GO:0009409//response to cold;GO:0009737//response to abscisic acid stimulus	gi|460386203|ref|XP_004238789.1|/1.0044e-97/PREDICTED: HVA22-like protein c-like [Solanum lycopersicum]
Solyc03g096550	22.4805	431.047	4.2611	4.12e-21	6.54e-18	-	-	-	-	gi|460379019|ref|XP_004235262.1|/1.84237e-106/PREDICTED: lipoxygenase homology domain-containing protein 1-like [Solanum lycopersicum]
Solyc03g020030	4.25179	79.5236	4.22524	1.56e-09	2.5e-07	-	-	GO:0030414//peptidase inhibitor activity	GO:0008152//metabolic process	gi|460377102|ref|XP_004234334.1|/7.01534e-130/PREDICTED: proteinase inhibitor type-2 CEVI57-like isoform 1 [Solanum lycopersicum]
Solyc01g073860	1.06295	18.8108	4.14542	0.00165855	0.0295281	-	-	-	GO:0006952//defense response;GO:0044763;GO:0044710;GO:0071702;GO:0006811//ion transport;GO:0071705;GO:1901700;GO:0044767;GO:0002376//immune system process;GO:1901698	gi|460366962|ref|XP_004229344.1|/3.43092e-145/PREDICTED: uncharacterized protein LOC101249575 [Solanum lycopersicum]
Solyc04g071070	47.0324	767.608	4.02864	1.92e-22	4.27e-19	K14709|1|5e-39|159|vcn:VOLCADRAFT_104214|solute carrier family 39 (zinc transporter), member 1/2/3	-	GO:0005199//structural constituent of cell wall	GO:0044763;GO:0016043//cellular component organization;GO:0010033//response to organic substance	gi|460384138|ref|XP_004237771.1|/0/PREDICTED: LOW QUALITY PROTEIN: extensin-3 [Solanum lycopersicum]
Solyc06g051320	2.49756	39.4467	3.98131	1.38e-05	0.00062065	K15400|1|2e-27|121|aly:ARALYDRAFT_493874|omega-hydroxypalmitate O-feruloyl transferase [EC:2.3.1.188];K13065|3|4e-22|104|aly:ARALYDRAFT_892660|shikimate O-hydroxycinnamoyltransferase [EC:2.3.1.133]	-	-	-	gi|460390628|ref|XP_004240930.1|/0/PREDICTED: vinorine synthase-like [Solanum lycopersicum]
Solyc03g097410	12.0641	190.435	3.98051	2.35e-14	1.37e-11	K00913|1|2e-95|347|vvi:100256264|inositol-1,3,4-trisphosphate 5/6-kinase / inositol-tetrakisphosphate 1-kinase [EC:2.7.1.159 2.7.1.134]	-	GO:0051766//inositol trisphosphate kinase activity;GO:0043167//ion binding	GO:0006796//phosphate-containing compound metabolic process	gi|460379438|ref|XP_004235469.1|/0/PREDICTED: inositol-tetrakisphosphate 1-kinase 1-like [Solanum lycopersicum]
Solyc06g071640	1.54115	23.9463	3.95772	0.000555065	0.0129037	K14548|1|2e-73|275|rcu:RCOM_0962120|U3 small nucleolar RNA-associated protein 4	-	GO:0080097//L-tryptophan:pyruvate aminotransferase activity;GO:0050362//L-tryptophan:2-oxoglutarate aminotransferase activity;GO:0016846//carbon-sulfur lyase activity	GO:0048467//gynoecium development;GO:0009684//indoleacetic acid biosynthetic process;GO:0009958//positive gravitropism;GO:0080022//primary root development;GO:0042742//defense response to bacterium;GO:0010087//phloem or xylem histogenesis;GO:0048825//cotyledon development;GO:0010588//cotyledon vascular tissue pattern formation;GO:0009723//response to ethylene stimulus;GO:0010078//maintenance of r…	gi|460393119|ref|XP_004242159.1|/0/PREDICTED: tryptophan aminotransferase-related protein 2-like [Solanum lycopersicum]
Solyc11g066390	735.026	11338.1	3.94724	5.18e-27	2.3e-23	K04565|1|3e-87|318|rcu:RCOM_0475040|Cu/Zn superoxide dismutase [EC:1.15.1.1]	GO:0009507//chloroplast	GO:0046872//metal ion binding;GO:0004784//superoxide dismutase activity;GO:0004601//peroxidase activity	GO:0006801//superoxide metabolic process;GO:0055114//oxidation-reduction process	gi|33327349|gb|AAQ09007.1|/1.0072e-121/superoxidase dismutase [Solanum lycopersicum]
Solyc12g042890	19.6112	290.037	3.88648	1.19e-16	1.1e-13	K06130|1|3e-114|409|rcu:RCOM_0220610|lysophospholipase II [EC:3.1.1.5]	-	GO:0050253//retinyl-palmitate esterase activity;GO:0080031//methyl salicylate esterase activity;GO:0004091//carboxylesterase activity;GO:0080032//methyl jasmonate esterase activity;GO:0080030//methyl indole-3-acetate esterase activity	-	gi|460413914|ref|XP_004252320.1|/1.08849e-150/PREDICTED: acyl-protein thioesterase 2-like [Solanum lycopersicum]
Solyc08g075240	3.93218	57.3556	3.86653	6.32e-07	4.65e-05	K15403|1|4e-09|62.0|sbi:SORBI_02g023010|fatty acid omega-hydroxy dehydrogenase [EC:1.1.-.-]	-	GO:0009055//electron carrier activity;GO:0046577//long-chain-alcohol oxidase activity	GO:0006066//alcohol metabolic process;GO:0009409//response to cold;GO:0055114//oxidation-reduction process	gi|460401007|ref|XP_004246021.1|/0/PREDICTED: long-chain-alcohol oxidase FAO4A-like [Solanum lycopersicum]
Solyc01g104400	35.3969	505.457	3.83589	1.59e-19	1.77e-16	-	GO:0048046//apoplast	GO:0005507//copper ion binding;GO:0009055//electron carrier activity	GO:0048653//anther development;GO:0009856//pollination	gi|460369328|ref|XP_004230515.1|/1.04502e-63/PREDICTED: basic blue protein-like [Solanum lycopersicum]
Solyc08g066880	2.49756	34.3069	3.77991	7.37e-05	0.00252219	-	-	GO:0003824//catalytic activity	GO:0009116//nucleoside metabolic process	gi|460399749|ref|XP_004245399.1|/6.73416e-117/PREDICTED: uncharacterized protein LOC101252010 [Solanum lycopersicum]
Solyc08g078180	6.64281	86.544	3.70357	1.12e-08	1.35e-06	K14517|1|3e-48|189|ath:AT5G47220|ethylene-responsive transcription factor 2;K09286|2|7e-47|185|ath:AT4G17500|EREBP-like factor	GO:0005634//nucleus	GO:0003700//sequence-specific DNA binding transcription factor activity	GO:0009864//induced systemic resistance, jasmonic acid mediated signaling pathway;GO:0010200//response to chitin;GO:0009628//response to abiotic stimulus;GO:0009737//response to abscisic acid stimulus;GO:0045893//positive regulation of transcription, DNA-dependent;GO:0009723//response to ethylene stimulus	gi|460400568|ref|XP_004245806.1|/3.27341e-132/PREDICTED: ethylene-responsive transcription factor 2-like [Solanum lycopersicum]
Solyc03g113250	19.5047	253.918	3.70247	6.86e-15	4.62e-12	K14638|1|2e-84|311|smo:SELMODRAFT_97812|solute carrier family 15 (peptide/histidine transporter), member 3/4	-	-	-	gi|460381576|ref|XP_004236524.1|/0/PREDICTED: nitrate transporter 1.2-like [Solanum lycopersicum]
Solyc01g090310	10.6295	136.854	3.68649	2.68e-11	6.91e-09	K09286|1|5e-31|131|ath:AT4G17500|EREBP-like factor;K14517|2|9e-29|124|ath:AT5G47220|ethylene-responsive transcription factor 2	-	-	-	gi|460370618|ref|XP_004231148.1|/1.89339e-84/PREDICTED: ethylene-responsive transcription factor 13-like, partial [Solanum lycopersicum]
Solyc10g074440	91.5175	1173.52	3.68065	2.45e-21	4.53e-18	K01183|1|1e-137|487|rcu:RCOM_0806420|chitinase [EC:3.14]	GO:0005773//vacuole;GO:0005618//cell wall;GO:0005576//extracellular region	GO:0004568//chitinase activity;GO:0008061//chitin binding	GO:0006032//chitin catabolic process;GO:0006952//defense response;GO:0000272//polysaccharide catabolic process;GO:0016998//cell wall macromolecule catabolic process	gi|460407111|ref|XP_004249000.1|/0/PREDICTED: endochitinase-like [Solanum lycopersicum]
Solyc01g080790	6.80141	85.5952	3.65362	2.63e-08	3.01e-06	-	-	-	-	gi|460367274|ref|XP_004229500.1|/2.36191e-132/PREDICTED: uncharacterized protein LOC101249206 [Solanum lycopersicum]
Solyc01g014290	3.77358	46.5824	3.62578	6.66e-06	0.000334315	K15174|1|2e-24|109|rcu:RCOM_1489440|RNA polymerase II-associated factor 1	-	-	-	gi|791148|emb|CAA60021.1|/8.24254e-45/extensin-like protein [Vigna unguiculata]
Solyc01g007080	1.64769	19.7511	3.58342	0.00255362	0.0407863	-	-	-	-	gi|460366056|ref|XP_004228909.1|/0/PREDICTED: aluminum-activated malate transporter 8-like [Solanum lycopersicum]
Solyc05g045670	34.6511	409.088	3.56144	1.54e-16	1.37e-13	K15283|1|2e-164|577|vvi:100241727|solute carrier family 35, member E1	GO:0016021//integral to membrane;GO:0005774//vacuolar membrane;GO:0009507//chloroplast;GO:0005886//plasma membrane	GO:0015120//phosphoglycerate transmembrane transporter activity;GO:0005315//inorganic phosphate transmembrane transporter activity;GO:0071917//triose-phosphate transmembrane transporter activity;GO:0015152//glucose-6-phosphate transmembrane transporter activity;GO:0015297//antiporter activity	GO:0007276//gamete generation;GO:0009749//response to glucose stimulus;GO:0009744//response to sucrose stimulus;GO:0015713//phosphoglycerate transport;GO:0015760//glucose-6-phosphate transport;GO:0035436//triose phosphate transmembrane transport;GO:0010109//regulation of photosynthesis;GO:0009553//embryo sac development;GO:0034389//lipid particle organization;GO:0010152//pollen maturation;GO:0007…	gi|460388988|ref|XP_004240145.1|/0/PREDICTED: glucose-6-phosphate/phosphate translocator 2, chloroplastic-like [Solanum lycopersicum]
Solyc09g062970	73.9801	843.637	3.51141	4.55e-19	4.81e-16	K01115|1|5e-20|94.0|vcn:VOLCADRAFT_99471|phospholipase D [EC:3.1.4.4]	-	-	-	gi|460403255|ref|XP_004247108.1|/2.13524e-48/PREDICTED: uncharacterized protein LOC101264365 [Solanum lycopersicum]
Solyc03g007550	2.71064	30.5883	3.49628	0.000243837	0.00667666	-	-	-	GO:0044260;GO:0044238//primary metabolic process	gi|460376990|ref|XP_004234279.1|/0/PREDICTED: uncharacterized protein LOC101257240 [Solanum lycopersicum]
Solyc07g007760	1089.05	12169	3.48207	4.68e-22	9.44e-19	-	-	GO:0008233//peptidase activity	GO:0006952//defense response;GO:0006508//proteolysis	gi|133711827|gb|ABO36643.1|/2.53087e-41/defensin protein [Solanum pimpinellifolium]
Solyc08g080660	235.015	2540.45	3.43425	9.63e-21	1.42e-17	-	-	-	-	gi|460400209|ref|XP_004245628.1|/2.89617e-161/PREDICTED: osmotin-like protein OSML15-like [Solanum lycopersicum]
Solyc08g078170	3.66704	39.0299	3.41189	6.38e-05	0.00223429	K09286|1|2e-43|174|ath:AT4G17500|EREBP-like factor;K14517|2|2e-42|170|ath:AT5G47220|ethylene-responsive transcription factor 2	-	-	-	gi|460400568|ref|XP_004245806.1|/1.3895e-69/PREDICTED: ethylene-responsive transcription factor 2-like [Solanum lycopersicum]
Solyc08g067940	13.8183	146.733	3.40854	1.09e-10	2.43e-08	-	-	-	-	gi|460399430|ref|XP_004245244.1|/6.868e-63/PREDICTED: uncharacterized protein LOC101253405 [Solanum lycopersicum]
Solyc07g007750	3.56051	37.5831	3.39993	9.91e-05	0.00320878	-	-	-	GO:0006952//defense response	gi|133711820|gb|ABO36637.1|/8.19241e-40/defensin protein [Solanum lycopersicum]
Solyc05g014710	4.94307	51.2584	3.37431	6.35e-06	0.000321824	K08818|1|2e-124|443|vvi:100246062|cell division cycle 2-like [EC:2.7.11.22]	GO:0005634//nucleus;GO:0005886//plasma membrane	GO:0003677//DNA binding	-	gi|460387022|ref|XP_004239190.1|/0/PREDICTED: uncharacterized protein LOC101262111 [Solanum lycopersicum]
Solyc01g091010	5.2082	53.6284	3.36414	6.25e-06	0.000319475	-	-	-	GO:0010158//abaxial cell fate specification;GO:0010154//fruit development;GO:0010159//specification of organ position;GO:0010450//inflorescence meristem growth;GO:0009909//regulation of flower development;GO:0009933//meristem structural organization;GO:0010093//specification of floral organ identity	gi|460367870|ref|XP_004229793.1|/2.95354e-129/PREDICTED: axial regulator YABBY 1-like [Solanum lycopersicum]
Solyc05g006870	7.76024	79.4084	3.35512	9.83e-08	9.58e-06	K03671|1|2e-41|165|vvi:100246832|thioredoxin 1	GO:0005886//plasma membrane	GO:0016671//oxidoreductase activity, acting on a sulfur group of donors, disulfide as acceptor;GO:0009055//electron carrier activity;GO:0015035//protein disulfide oxidoreductase activity	GO:0045454//cell redox homeostasis;GO:0000103//sulfate assimilation;GO:0006662//glycerol ether metabolic process	gi|460386135|ref|XP_004238755.1|/1.70505e-74/PREDICTED: thioredoxin H2-like isoform 1 [Solanum lycopersicum]
Solyc09g065410	2.49756	24.9207	3.31876	0.00160268	0.0289933	-	-	-	-	gi|460403406|ref|XP_004247182.1|/6.04675e-85/PREDICTED: lipid transfer-like protein VAS-like [Solanum lycopersicum]
Solyc08g080670	507.499	5024.16	3.30741	3.48e-20	4.55e-17	-	-	-	-	gi|350538609|ref|NP_001234351.1|/4.18206e-160/PR5-like protein precursor [Solanum lycopersicum]
Solyc09g011260	8.50357	83.6847	3.29882	1.15e-07	1.07e-05	-	-	-	GO:0044699;GO:0050896//response to stimulus	gi|460402727|ref|XP_004246862.1|/3.11923e-66/PREDICTED: uncharacterized protein LOC101250920 [Solanum lycopersicum]
Solyc09g066350	2.49756	24.457	3.29165	0.00186769	0.0324703	K14517|1|2e-25|112|ath:AT5G47220|ethylene-responsive transcription factor 2;K09286|2|2e-24|109|osa:4349395|EREBP-like factor	GO:0005634//nucleus	GO:0003677//DNA binding;GO:0003700//sequence-specific DNA binding transcription factor activity	GO:0006355//regulation of transcription, DNA-dependent;GO:0010200//response to chitin;GO:0009873//ethylene mediated signaling pathway	gi|460403747|ref|XP_004247349.1|/6.59558e-89/PREDICTED: ethylene-responsive transcription factor ERF098-like [Solanum lycopersicum]
Solyc09g008750	8.71665	84.5354	3.27771	9.25e-08	9.09e-06	-	-	-	-	gi|460402166|ref|XP_004246585.1|/9.36862e-84/PREDICTED: uncharacterized protein LOC101249954 [Solanum lycopersicum]
Solyc05g007630	4.03871	38.5704	3.25553	0.000134043	0.00413318	K13457|1|2e-69|263|vvi:100252764|disease resistance protein RPM1	-	GO:0043531//ADP binding	GO:0006952//defense response	gi|460387448|ref|XP_004239389.1|/0/PREDICTED: late blight resistance protein R1-A-like [Solanum lycopersicum]
Solyc03g034380	14.7202	139.615	3.24558	1.34e-09	2.18e-07	-	-	-	-	gi|311893257|dbj|BAJ25798.1|/7.41386e-25/putative non-specific lipid-transfer protein type 2 subfamily [Nicotiana tabacum]
Solyc07g042510	123.195	1161.11	3.23649	9.25e-18	9.34e-15	K06890|1|1e-81|300|vvi:100266616|	GO:0016021//integral to membrane	-	GO:0006623//protein targeting to vacuole;GO:0006944//cellular membrane fusion;GO:0048193//Golgi vesicle transport;GO:0016197//endosomal transport	gi|460396231|ref|XP_004243681.1|/3.77344e-134/PREDICTED: BI1-like protein-like [Solanum lycopersicum]
Solyc01g080380	6.96242	65.4187	3.23204	1.62e-06	0.00010237	K01611|1|1e-145|513|vvi:100261356|S-adenosylmethionine decarboxylase [EC:4.1.1.50]	-	GO:0004014//adenosylmethionine decarboxylase activity	GO:0006557//S-adenosylmethioninamine biosynthetic process;GO:0006597//spermine biosynthetic process;GO:0008295//spermidine biosynthetic process	gi|460367214|ref|XP_004229470.1|/0/PREDICTED: S-adenosylmethionine decarboxylase proenzyme-like [Solanum lycopersicum]
Solyc04g007380	7.91883	73.7792	3.21986	6.33e-07	4.65e-05	K13417|1|6e-52|202|aly:ARALYDRAFT_899604|somatic embryogenesis receptor kinase 4 [EC:2.7.10.1 2.7.11.1];K13418|2|6e-52|202|vvi:100247683|somatic embryogenesis receptor kinase 1 [EC:2.7.10.1 2.7.11.1];K13416|5|2e-51|201|rcu:RCOM_1534760|brassinosteroid insensitive 1-associated receptor kinase 1 [EC:2.7.10.1 2.7.11.1]	-	GO:0005524//ATP binding;GO:0004674//protein serine/threonine kinase activity	GO:0006468//protein phosphorylation	gi|460382556|ref|XP_004237005.1|/0/PREDICTED: probable receptor-like protein kinase At5g39020-like [Solanum lycopersicum]
Solyc04g064610	32.047	298.419	3.21908	3.79e-13	1.62e-10	K15382|1|4e-97|352|rcu:RCOM_0138900|solute carrier family 50 (sugar transporter)	GO:0005887//integral to plasma membrane;GO:0005783//endoplasmic reticulum	GO:0051119//sugar transmembrane transporter activity	GO:0008643//carbohydrate transport	gi|460384038|ref|XP_004237722.1|/5.32953e-136/PREDICTED: bidirectional sugar transporter SWEET1-like [Solanum lycopersicum]
Solyc03g122360	49.0541	454.619	3.21221	8.18e-15	5.05e-12	K05280|1|8e-122|435|vvi:100263810|flavonoid 3'-monooxygenase [EC:1.14.13.21]	-	GO:0020037//heme binding;GO:0033772;GO:0005506//iron ion binding;GO:0009055//electron carrier activity	GO:0055114//oxidation-reduction process	gi|460379596|ref|XP_004235547.1|/0/PREDICTED: flavonoid 3'-monooxygenase-like [Solanum lycopersicum]
Solyc01g014280	15.9963	147.652	3.2064	8.46e-10	1.53e-07	K01115|1|9e-38|155|vcn:VOLCADRAFT_99471|phospholipase D [EC:3.1.4.4]	-	-	-	gi|76262500|gb|ABA41400.1|/1.10513e-60/pherophorin-C2 protein precursor [Chlamydomonas reinhardtii]
Solyc01g100980	29.8146	271.741	3.18814	1.53e-12	5.29e-10	K01184|1|4e-104|376|ath:AT5G14650|polygalacturonase [EC:3.2.1.15]	GO:0005576//extracellular region	GO:0004650//polygalacturonase activity;GO:0047911	GO:0005975//carbohydrate metabolic process	gi|460368977|ref|XP_004230341.1|/0/PREDICTED: polygalacturonase At1g48100-like [Solanum lycopersicum]
Solyc10g083440	17.5398	156.145	3.15418	3.29e-10	6.9e-08	K12930|1|6e-124|442|pop:POPTR_287596|anthocyanidin 3-O-glucosyltransferase [EC:2.4.1.115];K10757|3|3e-116|416|ath:AT5G17050|flavonol 3-O-glucosyltransferase [EC:2.4.1.91]	-	GO:0035251//UDP-glucosyltransferase activity	-	gi|460408022|ref|XP_004249447.1|/0/PREDICTED: anthocyanidin 3-O-glucosyltransferase-like [Solanum lycopersicum]
Solyc01g094380	2.6041	23.0358	3.14502	0.00292443	0.0451861	K13667|1|3e-143|506|gmx:100797600|protein glucosyltransferase [EC:2.4.1.-]	GO:0005576//extracellular region;GO:0005634//nucleus	-	-	gi|359489773|ref|XP_002273091.2|/0/PREDICTED: O-glucosyltransferase rumi-like [Vitis vinifera]
Solyc03g116280	3.29538	28.682	3.12163	0.000826336	0.0175555	K04124|1|6e-12|60.5|ath:AT1G15550|gibberellin 3-beta-dioxygenase [EC:1.14.11.15];K05933|3|2e-11|62.8|osa:4347225|aminocyclopropanecarboxylate oxidase [EC:1.14.17.4]	GO:0031461//cullin-RING ubiquitin ligase complex	GO:0031625//ubiquitin protein ligase binding;GO:0045431//flavonol synthase activity	GO:0006511//ubiquitin-dependent protein catabolic process;GO:0055114//oxidation-reduction process;GO:0009960//endosperm development;GO:0009911//positive regulation of flower development;GO:0051555//flavonol biosynthetic process;GO:0009639//response to red or far red light;GO:0009793//embryo development ending in seed dormancy	gi|460380603|ref|XP_004236044.1|/9.8625e-70/PREDICTED: gibberellin 3-beta-dioxygenase 1-like [Solanum lycopersicum]
Solyc07g044900	33.323	282.553	3.08393	3.03e-12	9.73e-10	-	-	-	-	-
Solyc12g006760	28.8582	242.995	3.07388	1.61e-11	4.27e-09	-	-	-	-	gi|224081419|ref|XP_002306403.1|/1.78074e-15/predicted protein [Populus trichocarpa]
Solyc04g011480	8.34498	69.567	3.05942	1.61e-06	0.00010237	-	GO:0016020//membrane	-	-	gi|460382045|ref|XP_004236750.1|/2.31061e-91/PREDICTED: CASP-like protein PIMP1-like [Solanum lycopersicum]
Solyc11g066580	27.9017	231.354	3.05168	3.15e-11	7.76e-09	K13083|1|0.0|782|pop:POPTR_54623|cytochrome P450, family 75, subfamily A (flavonoid 3',5'-hydroxylase) [EC:1.14.13.88]	-	GO:0020037//heme binding;GO:0016705//oxidoreductase activity, acting on paired donors, with incorporation or reduction of molecular oxygen;GO:0004497//monooxygenase activity;GO:0005506//iron ion binding;GO:0009055//electron carrier activity	GO:0055114//oxidation-reduction process	gi|289064208|gb|ADC80513.1|/0/flavonoid 3`,5`-hydroxylase [Solanum lycopersicum]
Solyc03g034390	47.4609	393.099	3.05008	2.23e-13	9.91e-11	-	-	-	-	gi|460377596|ref|XP_004234577.1|/4.87669e-21/PREDICTED: probable non-specific lipid-transfer protein AKCS9-like [Solanum lycopersicum]
Solyc07g018250	5.89948	47.9736	3.02358	4.7e-05	0.00172614	K10249|1|1e-13|75.5|olu:OSTLU_33532|elongation of very long chain fatty acids protein 4;K10244|2|1e-13|75.1|ppp:PHYPADRAFT_195959|elongation of very long chain fatty acids protein 5 [EC:2.3.1.-]	-	-	GO:0046520//sphingoid biosynthetic process;GO:0016126//sterol biosynthetic process	gi|460394674|ref|XP_004242925.1|/4.37629e-140/PREDICTED: putative elongation of fatty acids protein DDB_G0272012-like [Solanum lycopersicum]
Solyc04g015820	43.8459	354.979	3.01722	9.82e-13	3.69e-10	-	-	-	-	-
Solyc09g007520	35.8726	289.552	3.01287	7.96e-12	2.26e-09	K00430|1|3e-142|502|pop:POPTR_589413|peroxidase [EC:1.11.1.7]	GO:0005576//extracellular region;GO:0005829//cytosol	GO:0046872//metal ion binding;GO:0020037//heme binding;GO:0004601//peroxidase activity	GO:0006979//response to oxidative stress;GO:0050832//defense response to fungus;GO:0055114//oxidation-reduction process	gi|460402345|ref|XP_004246673.1|/0/PREDICTED: peroxidase 21-like [Solanum lycopersicum]
Solyc03g111300	21.4175	170.199	2.99036	1.22e-09	2.02e-07	K00517|1|5e-122|436|ath:AT3G56630|[EC:1.14.-.-];K13407|2|2e-120|431|vvi:100259592|cytochrome P450, family 94, subfamily A, polypeptide 1 (fatty acid omega-hydroxylase) [EC:1.14.-.-]	GO:0005576//extracellular region;GO:0009507//chloroplast	GO:0070330//aromatase activity;GO:0009055//electron carrier activity;GO:0019825//oxygen binding;GO:0020037//heme binding;GO:0052694//jasmonoyl-isoleucine-12-hydroxylase activity;GO:0005506//iron ion binding	GO:0009753//response to jasmonic acid stimulus;GO:0055114//oxidation-reduction process;GO:0009620//response to fungus;GO:0009611//response to wounding;GO:0010154//fruit development;GO:0009695//jasmonic acid biosynthetic process;GO:0048480//stigma development;GO:0010200//response to chitin;GO:0009555//pollen development;GO:0002213//defense response to insect;GO:0048653//anther development	gi|460381184|ref|XP_004236332.1|/0/PREDICTED: cytochrome P450 94A1-like [Solanum lycopersicum]
Solyc11g044840	5.52781	43.2592	2.96823	9.84e-05	0.00319987	K10206|1|2e-175|613|rcu:RCOM_0399800|LL-diaminopimelate aminotransferase [EC:2.6.1.83]	GO:0009507//chloroplast	GO:0004069//L-aspartate:2-oxoglutarate aminotransferase activity;GO:0080130//L-phenylalanine:2-oxoglutarate aminotransferase activity;GO:0010285//L,L-diaminopimelate aminotransferase activity;GO:0030170//pyridoxal phosphate binding	GO:0009862//systemic acquired resistance, salicylic acid mediated signaling pathway;GO:0009693//ethylene biosynthetic process;GO:0042742//defense response to bacterium;GO:0009089//lysine biosynthetic process via diaminopimelate;GO:0010150//leaf senescence	gi|460410685|ref|XP_004250752.1|/0/PREDICTED: aminotransferase ALD1-like [Solanum lycopersicum]
Solyc07g052180	10.8946	85.0717	2.96507	8.79e-07	6.16e-05	K14709|1|1e-43|174|vcn:VOLCADRAFT_104214|solute carrier family 39 (zinc transporter), member 1/2/3	-	-	-	gi|21322711|emb|CAD22154.1|/4.05372e-64/pherophorin-dz1 protein [Volvox carteri f. nagariensis]
Solyc05g041440	5.31473	41.3828	2.96096	0.000167363	0.00496079	-	-	-	-	gi|460389365|ref|XP_004240326.1|/0/PREDICTED: ankyrin repeat-containing protein At3g12360-like [Solanum lycopersicum]
Solyc03g020040	18.2832	141.993	2.95724	6.09e-09	8.3e-07	-	-	GO:0030414//peptidase inhibitor activity	GO:0008152//metabolic process	gi|460377100|ref|XP_004234333.1|/7.01534e-130/PREDICTED: proteinase inhibitor type-2 CEVI57-like [Solanum lycopersicum]
Solyc03g093130	70.3131	544.792	2.95384	9.98e-14	4.92e-11	K08235|1|3e-135|479|vvi:100252949|xyloglucan:xyloglucosyl transferase [EC:2.4.1.207];K14504|2|3e-135|479|vvi:100256520|xyloglucan:xyloglucosyl transferase TCH4 [EC:2.4.1.207]	GO:0048046//apoplast;GO:0005618//cell wall	GO:0004553//hydrolase activity, hydrolyzing O-glycosyl compounds;GO:0016762//xyloglucan:xyloglucosyl transferase activity	GO:0006073//cellular glucan metabolic process	gi|350535843|ref|NP_001234472.1|/7.41679e-170/xyloglucan endotransglucosylase-hydrolase XTH3 precursor [Solanum lycopersicum]
Solyc01g058250	5.79294	44.6292	2.94562	0.000113176	0.00358945	K04124|1|8e-107|385|pop:POPTR_578149|gibberellin 3-beta-dioxygenase [EC:1.14.11.15]	-	GO:0016706//oxidoreductase activity, acting on paired donors, with incorporation or reduction of molecular oxygen, 2-oxoglutarate as one donor, and incorporation of one atom each of oxygen into both donors	-	gi|460366455|ref|XP_004229097.1|/0/PREDICTED: gibberellin 3-beta-dioxygenase 1-like [Solanum lycopersicum]
Solyc02g078150	84.1314	647.318	2.94376	3.94e-14	2.24e-11	-	-	-	-	gi|460374167|ref|XP_004232883.1|/1.50586e-179/PREDICTED: uncharacterized protein LOC101251740 [Solanum lycopersicum]
Solyc03g114890	20.7262	158.872	2.93834	4.17e-09	6.01e-07	-	GO:0009531//secondary cell wall	-	GO:0009834//secondary cell wall biogenesis;GO:0009808//lignin metabolic process;GO:0009830//cell wall modification involved in abscission	gi|460380653|ref|XP_004236069.1|/0/PREDICTED: COBRA-like protein 4-like [Solanum lycopersicum]
Solyc12g096530	9.93819	76.1535	2.93786	2.4e-06	0.000144483	K00430|1|2e-124|443|pop:POPTR_1106291|peroxidase [EC:1.11.1.7]	GO:0005576//extracellular region	GO:0046872//metal ion binding;GO:0016788//hydrolase activity, acting on ester bonds;GO:0020037//heme binding;GO:0004601//peroxidase activity	GO:0006979//response to oxidative stress;GO:0006397//mRNA processing;GO:0055114//oxidation-reduction process	gi|460415411|ref|XP_004253052.1|/0/PREDICTED: peroxidase 46-like [Solanum lycopersicum]
Solyc10g052500	25.7759	197.494	2.93772	4.67e-10	9.25e-08	K00224|1|3e-122|436|aly:ARALYDRAFT_476671|[EC:1.3.1.-];K13081|5|5e-62|236|pop:POPTR_835080|leucoanthocyanidin reductase [EC:1.17.1.3]	-	GO:0000166//nucleotide binding	GO:0046686//response to cadmium ion	gi|460406523|ref|XP_004248712.1|/9.45402e-174/PREDICTED: isoflavone reductase homolog [Solanum lycopersicum]
Solyc12g011100	11.5859	86.076	2.89324	1.08e-06	7.26e-05	-	-	-	-	-
Solyc04g080720	3.98666	29.6096	2.89281	0.00104362	0.0208921	K15400|1|1e-59|229|aly:ARALYDRAFT_493874|omega-hydroxypalmitate O-feruloyl transferase [EC:2.3.1.188]	GO:0005737//cytoplasm	GO:0050638	-	gi|460385203|ref|XP_004238294.1|/0/PREDICTED: omega-hydroxypalmitate O-feruloyl transferase-like [Solanum lycopersicum]
Solyc06g074390	49.2672	365.16	2.88983	4.06e-12	1.22e-09	K13356|1|0.0|679|vvi:100259719|fatty acyl-CoA reductase [EC:1.2.1.-]	GO:0005783//endoplasmic reticulum	GO:0080019//fatty-acyl-CoA reductase (alcohol-forming) activity;GO:0016627//oxidoreductase activity, acting on the CH-CH group of donors;GO:0000166//nucleotide binding	GO:0010025//wax biosynthetic process;GO:0009556//microsporogenesis;GO:0055114//oxidation-reduction process	gi|460391411|ref|XP_004241314.1|/0/PREDICTED: fatty acyl-CoA reductase 3-like [Solanum lycopersicum]
Solyc08g062210	171.764	1268.5	2.88463	7.4e-15	4.7e-12	K08064|1|6e-43|172|sbi:SORBI_01g045500|nuclear transcription factor Y, alpha	-	-	-	gi|460399055|ref|XP_004245059.1|/0/PREDICTED: nuclear transcription factor Y subunit A-8-like [Solanum lycopersicum]
Solyc04g050570	26.4671	193.299	2.86856	1.04e-09	1.81e-07	K00514|1|2e-21|101|rcu:RCOM_1428040|zeta-carotene desaturase [EC:1.3.5.6];K01206|2|9e-21|99.4|ath:AT1G67830|alpha-L-fucosidase [EC:3.2.1.51]	-	GO:0016788//hydrolase activity, acting on ester bonds	GO:0006629//lipid metabolic process	gi|460383595|ref|XP_004237506.1|/0/PREDICTED: GDSL esterase/lipase At5g33370-like [Solanum lycopersicum]
Solyc05g006830	26.7323	194.613	2.86396	1.18e-09	1.99e-07	K03671|1|6e-44|173|vvi:100246832|thioredoxin 1	GO:0005886//plasma membrane	GO:0016671//oxidoreductase activity, acting on a sulfur group of donors, disulfide as acceptor;GO:0009055//electron carrier activity;GO:0015035//protein disulfide oxidoreductase activity	GO:0045454//cell redox homeostasis;GO:0000103//sulfate assimilation;GO:0006662//glycerol ether metabolic process	gi|460386125|ref|XP_004238750.1|/2.63052e-75/PREDICTED: thioredoxin H2-like [Solanum lycopersicum]
Solyc07g055990	11.9055	85.9864	2.85248	1.06e-06	7.2e-05	K14504|1|2e-109|393|vvi:100256520|xyloglucan:xyloglucosyl transferase TCH4 [EC:2.4.1.207];K08235|2|4e-108|389|vvi:100252173|xyloglucan:xyloglucosyl transferase [EC:2.4.1.207]	GO:0048046//apoplast;GO:0005618//cell wall	GO:0004553//hydrolase activity, hydrolyzing O-glycosyl compounds;GO:0016762//xyloglucan:xyloglucosyl transferase activity	GO:0006073//cellular glucan metabolic process	gi|460395316|ref|XP_004243230.1|/2.10204e-172/PREDICTED: probable xyloglucan endotransglucosylase/hydrolase protein 16-like [Solanum lycopersicum]
Solyc01g109750	4.14525	29.6266	2.83736	0.00176103	0.0309798	K02201|1|7e-84|308|gmx:100797359|pantetheine-phosphate adenylyltransferase [EC:2.7.7.3];K08486|3|2e-73|273|ath:AT2G18260|syntaxin 1B/2/3	GO:0005886//plasma membrane;GO:0005634//nucleus	GO:0005484//SNAP receptor activity	GO:0006944//cellular membrane fusion;GO:0009409//response to cold;GO:0016192//vesicle-mediated transport;GO:0006886//intracellular protein transport	gi|460370200|ref|XP_004230942.1|/6.45348e-155/PREDICTED: syntaxin-112-like [Solanum lycopersicum]
Solyc05g009040	32.4731	231.805	2.83559	2.8e-10	5.99e-08	K13416|1|5e-51|200|rcu:RCOM_1534760|brassinosteroid insensitive 1-associated receptor kinase 1 [EC:2.7.10.1 2.7.11.1];K13418|4|2e-49|195|pop:POPTR_913861|somatic embryogenesis receptor kinase 1 [EC:2.7.10.1 2.7.11.1]	-	GO:0005524//ATP binding;GO:0004674//protein serine/threonine kinase activity	GO:0006468//protein phosphorylation	gi|145839451|gb|ABP96804.1|/0/receptor-like protein kinase [Capsicum annuum]
Solyc01g106610	6.27114	44.6761	2.8327	0.000178149	0.00525245	K13449|1|9e-57|217|rcu:RCOM_1381930|pathogenesis-related protein 1	GO:0005576//extracellular region	-	GO:0009607//response to biotic stimulus;GO:0006952//defense response	gi|350539263|ref|NP_001234128.1|/2.13027e-101/pathogenesis-related protein 1A1 precursor [Solanum lycopersicum]
Solyc12g098590	26.202	186.635	2.83247	1.72e-09	2.73e-07	K12338|1|6e-114|409|aly:ARALYDRAFT_915488|anthocyanin 5-O-glucosyltransferase [EC:2.4.1.-];K13692|3|1e-112|404|ath:AT1G05560|UDP-glucose:(indol-3-yl)acetate beta-D-glucosyltransferase [EC:2.4.1.121]	-	GO:0035251//UDP-glucosyltransferase activity	GO:0008152//metabolic process	gi|460415261|ref|XP_004252978.1|/0/PREDICTED: UDP-glycosyltransferase 75D1-like [Solanum lycopersicum]
Solyc07g049700	3.98666	28.1927	2.82207	0.00159519	0.02891	K13457|1|6e-73|274|vvi:100252764|disease resistance protein RPM1	-	-	-	gi|460395851|ref|XP_004243493.1|/0/PREDICTED: putative late blight resistance protein homolog R1A-10-like [Solanum lycopersicum]
Solyc05g050130	1859.48	13108	2.81747	6.12e-16	5.03e-13	K01183|1|7e-117|418|vvi:100233088|chitinase [EC:3.2.1.14]	GO:0005773//vacuole	GO:0004568//chitinase activity;GO:0003796//lysozyme activity	GO:0006032//chitin catabolic process;GO:0000272//polysaccharide catabolic process	gi|460388877|ref|XP_004240090.1|/3.07169e-171/PREDICTED: acidic endochitinase-like [Solanum lycopersicum]
Solyc02g089630	93.4873	658.895	2.81721	2.15e-13	9.73e-11	K00318|1|2e-166|583|vvi:100254983|proline dehydrogenase [EC:1.5.99.8]	GO:0005739//mitochondrion	GO:0004657//proline dehydrogenase activity	GO:0006537//glutamate biosynthetic process;GO:0006979//response to oxidative stress;GO:0006562//proline catabolic process;GO:0055114//oxidation-reduction process	gi|460372589|ref|XP_004232111.1|/0/PREDICTED: proline dehydrogenase 2, mitochondrial-like [Solanum lycopersicum]
Solyc10g054900	53.5711	376.662	2.81374	1.09e-11	3.02e-09	-	-	-	-	gi|460406453|ref|XP_004248679.1|/1.37008e-135/PREDICTED: proline-rich protein 4-like [Solanum lycopersicum]
Solyc06g075650	260.791	1822.35	2.80484	7.08e-15	4.62e-12	K09873|1|1e-118|423|ath:AT4G01470|aquaporin TIP	GO:0005737//cytoplasm;GO:0016021//integral to membrane	GO:0015204//urea transmembrane transporter activity;GO:0015250//water channel activity	GO:0006833//water transport;GO:0071918//urea transmembrane transport	gi|460391280|ref|XP_004241251.1|/4.02394e-142/PREDICTED: aquaporin TIP1-3-like [Solanum lycopersicum]
Solyc06g007180	31.1971	215.266	2.78664	9.79e-10	1.72e-07	K01953|1|0.0|1086|vvi:100241610|asparagine synthase (glutamine-hydrolysing) [EC:6.3.5.4]	-	GO:0005524//ATP binding;GO:0004066//asparagine synthase (glutamine-hydrolyzing) activity	GO:0009749//response to glucose stimulus;GO:0009744//response to sucrose stimulus;GO:0009750//response to fructose stimulus;GO:0070981//L-asparagine biosynthetic process;GO:0043617//cellular response to sucrose starvation	gi|460389532|ref|XP_004240406.1|/0/PREDICTED: asparagine synthetase [glutamine-hydrolyzing] [Solanum lycopersicum]
Solyc05g009550	23.65	162.702	2.78232	1.16e-08	1.4e-06	K03453|1|5e-13|73.9|vcn:VOLCADRAFT_102664|bile acid:Na+ symporter, BASS family	-	-	GO:0006979//response to oxidative stress;GO:0006952//defense response;GO:0009987//cellular process;GO:0050789//regulation of biological process	gi|460386510|ref|XP_004238941.1|/0/PREDICTED: uncharacterized protein LOC101258366 [Solanum lycopersicum]
Solyc06g053870	10.4164	71.4391	2.77786	9.69e-06	0.000457598	K15397|1|0.0|640|rcu:RCOM_0909590|3-ketoacyl-CoA synthase [EC:2.3.1.-]	GO:0016020//membrane	GO:0009922//fatty acid elongase activity	GO:0006633//fatty acid biosynthetic process;GO:0009611//response to wounding;GO:0009409//response to cold;GO:0010345//suberin biosynthetic process;GO:0006970//response to osmotic stress;GO:0009416//response to light stimulus	gi|460390845|ref|XP_004241035.1|/0/PREDICTED: 3-ketoacyl-CoA synthase 11-like [Solanum lycopersicum]
Solyc01g079930	8.02537	54.5559	2.7651	5.57e-05	0.00198956	K00924|1|1e-11|69.3|ath:AT5G22850|[EC:2.7.1.-]	-	-	-	gi|460367132|ref|XP_004229429.1|/0/PREDICTED: basic 7S globulin-like [Solanum lycopersicum]
Solyc02g081340	29.656	200.821	2.75952	2.26e-09	3.46e-07	K00799|1|8e-82|301|pop:POPTR_678517|glutathione S-transferase [EC:2.5.1.18]	-	GO:0016740//transferase activity	GO:0006979//response to oxidative stress	gi|460373734|ref|XP_004232669.1|/5.04271e-130/PREDICTED: glutathione S-transferase F11-like [Solanum lycopersicum]
Solyc01g066680	3131.73	21172.8	2.75718	1.58e-15	1.24e-12	-	GO:0005576//extracellular region	-	-	gi|460366768|ref|XP_004229251.1|/2.51214e-80/PREDICTED: phylloplanin-like [Solanum lycopersicum]
Solyc01g098770	6.96242	47.0034	2.75511	0.000149513	0.00454704	K00924|1|4e-11|67.8|ath:AT5G22850|[EC:2.7.1.-]	-	-	-	gi|460370855|ref|XP_004231264.1|/0/PREDICTED: basic 7S globulin-like [Solanum lycopersicum]
Solyc03g007130	6.37768	42.7741	2.74563	0.000285743	0.00756112	K06638|1|3e-07|55.8|osa:4325085|mitotic spindle assembly checkpoint protein MAD1	GO:0055028//cortical microtubule;GO:0009524//phragmoplast;GO:0009574//preprophase band	GO:0008017//microtubule binding	GO:0007000//nucleolus organization;GO:0006275//regulation of DNA replication;GO:0007131//reciprocal meiotic recombination;GO:0046785//microtubule polymerization;GO:0000911//cytokinesis by cell plate formation;GO:0051567//histone H3-K9 methylation;GO:0045010//actin nucleation;GO:0010389//regulation of G2/M transition of mitotic cell cycle;GO:0008283//cell proliferation;GO:0009624//response to nema…	gi|460376752|ref|XP_004234161.1|/0/PREDICTED: 65-kDa microtubule-associated protein 3-like [Solanum lycopersicum]
Solyc09g092720	9.08832	60.6574	2.7386	3.07e-05	0.00119774	K13195|1|3e-08|55.5|pop:POPTR_712972|cold-inducible RNA-binding protein;K12741|2|3e-07|52.0|ath:AT5G40490|heterogeneous nuclear ribonucleoprotein A1/A3;K12831|4|6e-06|47.8|bdi:100822253|splicing factor 3B subunit 4	-	-	-	gi|460404889|ref|XP_004247911.1|/1.83478e-60/PREDICTED: uncharacterized protein LOC101256418 [Solanum lycopersicum]
Solyc03g113120	7.6537	50.816	2.73105	8.89e-05	0.00294112	K13424|1|1e-22|106|vvi:100243352|WRKY transcription factor 33	-	GO:0003700//sequence-specific DNA binding transcription factor activity;GO:0043565//sequence-specific DNA binding	GO:0006355//regulation of transcription, DNA-dependent	gi|350537361|ref|NP_001234802.1|/0/transcription factor WRKY72 [Solanum lycopersicum]
Solyc03g005040	40.0699	265.635	2.72886	5.95e-10	1.13e-07	K13448|1|5e-42|167|rcu:RCOM_1677910|calcium-binding protein CML	-	-	-	gi|460376888|ref|XP_004234228.1|/2.5679e-78/PREDICTED: putative calcium-binding protein CML19-like [Solanum lycopersicum]
Solyc04g071100	20.9938	137.734	2.71385	6.03e-08	6.17e-06	K01115|1|1e-15|79.7|vcn:VOLCADRAFT_99471|phospholipase D [EC:3.1.4.4]	-	GO:0005199//structural constituent of cell wall	GO:0043161//proteasomal ubiquitin-dependent protein catabolic process;GO:0009753//response to jasmonic acid stimulus;GO:0043248//proteasome assembly;GO:0048767//root hair elongation;GO:0009735//response to cytokinin stimulus;GO:0051788//response to misfolded protein;GO:0009611//response to wounding;GO:0009751//response to salicylic acid stimulus;GO:0009737//response to abscisic acid stimulus;GO:0…	gi|460385583|ref|XP_004238483.1|/2.25392e-58/PREDICTED: extensin-3-like [Solanum lycopersicum]
Solyc03g114530	8.39704	55.0154	2.71188	7.56e-05	0.00257692	K01757|1|1e-60|231|ath:AT1G74000|strictosidine synthase [EC:4.3.3.2]	-	-	-	gi|460380695|ref|XP_004236090.1|/0/PREDICTED: strictosidine synthase 1-like [Solanum lycopersicum]
Solyc07g008360	14.4551	94.5347	2.70926	1.98e-06	0.000122501	K01904|1|0.0|835|rcu:RCOM_0246200|4-coumarate--CoA ligase [EC:6.2.1.12]	-	GO:0047077;GO:0016874//ligase activity	GO:0055114//oxidation-reduction process	gi|460394398|ref|XP_004242790.1|/0/PREDICTED: 4-coumarate--CoA ligase 1-like [Solanum lycopersicum]
Solyc01g095770	5.42127	35.2899	2.70255	0.00086556	0.0181115	K05391|1|0.0|917|rcu:RCOM_1579800|cyclic nucleotide gated channel, other eukaryote	GO:0005886//plasma membrane	GO:0030551//cyclic nucleotide binding;GO:0005242//inward rectifier potassium channel activity;GO:0005221//intracellular cyclic nucleotide activated cation channel activity;GO:0005516//calmodulin binding	GO:0006816//calcium ion transport;GO:0006813//potassium ion transport	gi|460370757|ref|XP_004231216.1|/0/PREDICTED: cyclic nucleotide-gated ion channel 1-like [Solanum lycopersicum]
Solyc12g009050	18.1766	117.068	2.68719	3.01e-07	2.43e-05	K08064|1|2e-33|140|sbi:SORBI_01g045500|nuclear transcription factor Y, alpha	-	-	-	gi|460412591|ref|XP_004251681.1|/1.92983e-144/PREDICTED: uncharacterized protein LOC101247294 [Solanum lycopersicum]
Solyc03g025380	154.653	994.111	2.68438	5.41e-13	2.18e-10	K00430|1|2e-122|436|rcu:RCOM_0688840|peroxidase [EC:1.11.1.7]	-	GO:0020037//heme binding;GO:0046872//metal ion binding;GO:0004601//peroxidase activity	GO:0055114//oxidation-reduction process;GO:0006979//response to oxidative stress	gi|460377276|ref|XP_004234419.1|/0/PREDICTED: peroxidase 52-like [Solanum lycopersicum]
Solyc10g050970	132.336	847.139	2.6784	7.93e-13	3.04e-10	K09286|1|2e-24|110|gmx:100170723|EREBP-like factor	-	-	-	gi|460406569|ref|XP_004248735.1|/7.64224e-128/PREDICTED: ethylene-responsive transcription factor ERF109-like [Solanum lycopersicum]
Solyc03g124110	404.874	2578.26	2.67086	4.19e-14	2.33e-11	K09286|1|7e-59|224|ath:AT4G25480|EREBP-like factor	GO:0005634//nucleus	GO:0003700//sequence-specific DNA binding transcription factor activity;GO:0003677//DNA binding	GO:0006355//regulation of transcription, DNA-dependent	gi|45826360|gb|AAS77821.1|/2.91853e-124/CBF2 [Solanum lycopersicum]
Solyc02g080850	4.99512	31.4945	2.65651	0.00248524	0.039895	-	-	-	-	gi|460373789|ref|XP_004232696.1|/0/PREDICTED: probable F-box protein At4g22030-like [Solanum lycopersicum]
Solyc04g040120	13.2336	82.723	2.64409	6.15e-06	0.000315359	K10256|1|2e-152|536|vvi:100258789|omega-6 fatty acid desaturase (delta-12 desaturase) [EC:1.14.19.-]	-	GO:0016717//oxidoreductase activity, acting on paired donors, with oxidation of a pair of donors resulting in the reduction of molecular oxygen to two molecules of water	GO:0006629//lipid metabolic process;GO:0055114//oxidation-reduction process	gi|460383235|ref|XP_004237336.1|/0/PREDICTED: omega-6 fatty acid desaturase, endoplasmic reticulum isozyme 2-like [Solanum lycopersicum]
Solyc01g006660	11.9575	74.2771	2.635	1.62e-05	0.00071125	K08653|1|2e-06|53.1|bdi:100822086|membrane-bound transcription factor site-1 protease [EC:3.4.21.112]	GO:0048046//apoplast;GO:0005618//cell wall	GO:0004252//serine-type endopeptidase activity	GO:0006508//proteolysis	gi|460366076|ref|XP_004228919.1|/0/PREDICTED: subtilisin-like protease-like [Solanum lycopersicum]
Solyc04g071090	5.6864	35.3155	2.63472	0.00133572	0.0251657	K01115|1|8e-12|66.6|rcu:RCOM_1613030|phospholipase D [EC:3.1.4.4];K15174|2|1e-09|59.7|gmx:100797526|RNA polymerase II-associated factor 1	-	-	GO:0009753//response to jasmonic acid stimulus;GO:0009611//response to wounding;GO:0009751//response to salicylic acid stimulus;GO:0009737//response to abscisic acid stimulus	gi|460385583|ref|XP_004238483.1|/4.36439e-30/PREDICTED: extensin-3-like [Solanum lycopersicum]
Solyc02g071930	8.71665	54.105	2.63392	9.13e-05	0.00300875	K15731|1|2e-42|171|ppp:PHYPADRAFT_152342|carboxy-terminal domain RNA polymerase II polypeptide A small phosphatase [EC:3.1.3.16]	-	GO:0016791//phosphatase activity	GO:0016311//dephosphorylation;GO:0001708//cell fate specification	gi|460374539|ref|XP_004233068.1|/1.3355e-166/PREDICTED: CTD small phosphatase-like protein-like [Solanum lycopersicum]
Solyc03g095940	6.96242	43.2123	2.63378	0.00038141	0.00958969	K01955|1|4e-31|132|vvi:100262205|carbamoyl-phosphate synthase large subunit [EC:6.3.5.5];K13944|2|2e-26|116|rcu:RCOM_0993260|LOB domain-containing protein 16	GO:0005634//nucleus	-	-	gi|460378965|ref|XP_004235237.1|/1.86039e-96/PREDICTED: LOB domain-containing protein 21-like [Solanum lycopersicum]
Solyc11g040340	48.628	301.359	2.63163	5.68e-10	1.09e-07	K01179|1|9e-174|608|osa:4335944|endoglucanase [EC:3.2.1.4]	GO:0009505//plant-type cell wall;GO:0005794//Golgi apparatus;GO:0009506//plasmodesma;GO:0005886//plasma membrane;GO:0005576//extracellular region;GO:0005829//cytosol	GO:0008810//cellulase activity	GO:0005975//carbohydrate metabolic process	gi|350538027|ref|NP_001234323.1|/0/endo-1,4-beta-D-glucanase precursor [Solanum lycopersicum]
Solyc06g074620	147.69	911.741	2.62605	2.02e-12	6.61e-10	-	-	-	GO:0006914//autophagy	gi|460391387|ref|XP_004241302.1|/2.19362e-102/PREDICTED: uncharacterized protein LOC101246727 [Solanum lycopersicum]
Solyc01g097070	5.79294	35.7281	2.62469	0.0011763	0.0228585	K10569|1|8e-15|79.3|aly:ARALYDRAFT_488218|endonuclease VIII-like 3;K03165|5|2e-08|57.8|ppp:PHYPADRAFT_155610|DNA topoisomerase III [EC:5.99.1.2]	-	GO:0005488//binding	GO:0070647//protein modification by small protein conjugation or removal;GO:0050896//response to stimulus;GO:0044699	gi|460368449|ref|XP_004230079.1|/1.10937e-179/PREDICTED: DNA topoisomerase 3-alpha-like [Solanum lycopersicum]
Solyc12g088170	50.1171	308.818	2.62338	4.51e-10	9.01e-08	K13065|1|9e-22|103|ath:AT5G48930|shikimate O-hydroxycinnamoyltransferase [EC:2.3.1.133];K15400|4|9e-21|99.8|ath:AT5G41040|omega-hydroxypalmitate O-feruloyl transferase [EC:2.3.1.188]	-	GO:0016747//transferase activity, transferring acyl groups other than amino-acyl groups	-	gi|350534858|ref|NP_001234419.1|/0/anthocyanin acyltransferase [Solanum lycopersicum]
Solyc01g008510	23.3848	143.874	2.62116	1.1e-07	1.04e-05	-	GO:0009535//chloroplast thylakoid membrane	-	GO:0009611//response to wounding;GO:0010224//response to UV-B;GO:0010193//response to ozone	gi|460366017|ref|XP_004228890.1|/5.00589e-58/PREDICTED: photosystem II 5 kDa protein, chloroplastic-like [Solanum lycopersicum]
Solyc05g053550	622.084	3822.8	2.61945	6.69e-14	3.38e-11	K00660|1|0.0|721|vvi:100258106|chalcone synthase [EC:2.3.1.74]	-	GO:0016210//naringenin-chalcone synthase activity	GO:0009813//flavonoid biosynthetic process	gi|350537407|ref|NP_001234036.1|/0/chalcone synthase 2 [Solanum lycopersicum]
Solyc06g062920	410.709	2517.74	2.61594	1.69e-13	7.8e-11	K05658|1|3e-106|384|vvi:100262734|ATP-binding cassette, subfamily B (MDR/TAP), member 1;K00924|2|3e-99|360|osa:4337593|[EC:2.7.1.-]	-	GO:0005524//ATP binding;GO:0004674//protein serine/threonine kinase activity	GO:0006468//protein phosphorylation	gi|350537699|ref|NP_001234561.1|/0/auxin-regulated dual specificity cytosolic kinase [Solanum lycopersicum]
Solyc01g006060	16.1028	97.8664	2.6035	2.9e-06	0.000171061	-	-	-	-	gi|460365681|ref|XP_004228729.1|/7.30614e-104/PREDICTED: disease resistance response protein 206-like [Solanum lycopersicum]
Solyc01g066740	33.9078	204.905	2.59527	1.02e-08	1.28e-06	K14555|1|1e-08|61.2|sbi:SORBI_06g027070|U3 small nucleolar RNA-associated protein 13;K15542|4|5e-07|55.8|olu:OSTLU_2326|polyadenylation factor subunit 2	-	-	-	gi|460366760|ref|XP_004229247.1|/0/PREDICTED: putative E3 ubiquitin-protein ligase LIN-like [Solanum lycopersicum]
Solyc09g075590	13.7118	82.7742	2.59377	8.6e-06	0.000415354	K01115|1|3e-06|49.3|gmx:100791059|phospholipase D [EC:3.1.4.4];K12831|2|3e-06|48.9|cre:CHLREDRAFT_196073|splicing factor 3B subunit 4;K03006|3|3e-06|48.9|sbi:SORBI_07g003680|DNA-directed RNA polymerase II subunit RPB1 [EC:2.7.7.6]	GO:0016020//membrane	-	GO:0009755//hormone-mediated signaling pathway	gi|359477137|ref|XP_002271531.2|/7.17874e-27/PREDICTED: uncharacterized protein LOC100248329 [Vitis vinifera]
Solyc03g005910	9.30139	55.9557	2.58877	8.69e-05	0.00289376	K00514|1|6e-18|90.1|rcu:RCOM_1428040|zeta-carotene desaturase [EC:1.3.5.6];K01206|2|7e-16|83.2|ath:AT1G67830|alpha-L-fucosidase [EC:3.2.1.51]	-	GO:0016787//hydrolase activity	-	gi|460376567|ref|XP_004234069.1|/0/PREDICTED: GDSL esterase/lipase At1g29670-like [Solanum lycopersicum]
Solyc03g093900	12.2772	73.8006	2.58766	1.74e-05	0.000756743	-	-	-	-	gi|460393856|ref|XP_004242524.1|/5.59043e-35/PREDICTED: uncharacterized protein LOC101258077 [Solanum lycopersicum]
Solyc03g007380	83.9728	502.636	2.58152	3.72e-11	9.09e-09	K13426|1|4e-16|84.0|rcu:RCOM_1689100|WRKY transcription factor 29;K13425|2|2e-15|81.3|vvi:100256849|WRKY transcription factor 22;K13424|3|7e-15|79.7|pop:POPTR_663578|WRKY transcription factor 33	-	-	-	gi|460376982|ref|XP_004234275.1|/0/PREDICTED: probable WRKY transcription factor 41-like [Solanum lycopersicum]
Solyc01g007000	156.779	936.993	2.57931	3.83e-12	1.17e-09	-	GO:0000151//ubiquitin ligase complex	GO:0004842//ubiquitin-protein ligase activity	GO:0016567//protein ubiquitination	gi|460365615|ref|XP_004228696.1|/0/PREDICTED: E3 ubiquitin-protein ligase PUB23-like [Solanum lycopersicum]
Solyc06g054630	37.6269	224.265	2.57537	8.29e-09	1.08e-06	K09286|1|6e-22|102|aly:ARALYDRAFT_470149|EREBP-like factor	GO:0005634//nucleus	GO:0003700//sequence-specific DNA binding transcription factor activity;GO:0003677//DNA binding	GO:0006355//regulation of transcription, DNA-dependent	gi|460390925|ref|XP_004241075.1|/1.23079e-142/PREDICTED: ethylene-responsive transcription factor ERF016-like [Solanum lycopersicum]
Solyc04g008600	9.67306	57.3428	2.56757	9.29e-05	0.00304601	K10904|1|5e-77|285|vvi:100240999|TIMELESS-interacting protein;K10998|5|3e-51|200|ppp:PHYPADRAFT_173665|replication fork protection complex subunit Csm3/Swi3	-	GO:0005488//binding	GO:0051726//regulation of cell cycle;GO:0010228//vegetative to reproductive phase transition of meristem;GO:0006270//DNA replication initiation;GO:0006275//regulation of DNA replication	gi|460382324|ref|XP_004236889.1|/2.84398e-172/PREDICTED: chromosome segregation in meiosis protein 3-like [Solanum lycopersicum]
Solyc09g091800	5.31473	31.4817	2.56644	0.00241601	0.0390904	K01115|1|4e-24|98.6|vcn:VOLCADRAFT_99471|phospholipase D [EC:3.1.4.4]	-	-	-	gi|413951841|gb|AFW84490.1|/9.55729e-33/hypothetical protein ZEAMMB73_428483, partial [Zea mays]
Solyc03g116060	161.246	949.053	2.55723	4.34e-12	1.27e-09	-	-	-	GO:0009739//response to gibberellin stimulus;GO:0045454//cell redox homeostasis	gi|460380594|ref|XP_004236040.1|/3.71356e-61/PREDICTED: gibberellin-regulated protein 6-like [Solanum lycopersicum]
Solyc04g074830	262.226	1542.75	2.55662	1.01e-12	3.74e-10	-	-	-	-	gi|460384519|ref|XP_004237958.1|/0/PREDICTED: putative clathrin assembly protein At4g40080-like [Solanum lycopersicum]
Solyc04g074820	7.44063	43.7187	2.55475	0.000499711	0.0119548	K05283|1|8e-16|83.2|aly:ARALYDRAFT_354960|phosphatidylinositol glycan, class W [EC:2.3.-.-];K11982|2|5e-10|63.9|ppp:PHYPADRAFT_169900|E3 ubiquitin-protein ligase RNF115/126 [EC:6.3.2.19];K15692|3|1e-08|59.3|gmx:100793048|E3 ubiquitin-protein ligase RNF13 [EC:6.3.2.19]	-	-	-	gi|460385689|ref|XP_004238534.1|/0/PREDICTED: E3 ubiquitin-protein ligase ATL15-like [Solanum lycopersicum]
Solyc02g092050	5.2082	30.5926	2.55433	0.00312224	0.0474453	K09285|1|0.0|700|vvi:100252316|AP2-like factor, ANT lineage	-	-	GO:0009987//cellular process;GO:0044699	gi|460372259|ref|XP_004231948.1|/0/PREDICTED: AP2-like ethylene-responsive transcription factor ANT-like [Solanum lycopersicum]
Solyc06g070990	13.7638	80.4341	2.54692	1.88e-05	0.000802492	K13424|1|1e-23|110|rcu:RCOM_0664190|WRKY transcription factor 33	-	GO:0003700//sequence-specific DNA binding transcription factor activity;GO:0043565//sequence-specific DNA binding	GO:0006355//regulation of transcription, DNA-dependent	gi|350536717|ref|NP_001234773.1|/0/WRKY72-like protein [Solanum lycopersicum]
Solyc08g079230	34.9683	204.093	2.54511	2.82e-08	3.21e-06	-	-	-	-	gi|460400411|ref|XP_004245728.1|/1.68345e-77/PREDICTED: 14 kDa proline-rich protein DC2.15-like [Solanum lycopersicum]
Solyc06g051300	6.53627	38.128	2.54431	0.0014082	0.0262745	K11270|1|5e-47|184|vvi:100241246|chromosome transmission fidelity protein 8	GO:0005634//nucleus	GO:0005515//protein binding	-	gi|460390624|ref|XP_004240928.1|/2.0957e-62/PREDICTED: chromosome transmission fidelity protein 8 homolog [Solanum lycopersicum]
Solyc02g063380	36.5143	212.93	2.54385	8.45e-09	1.08e-06	-	-	-	-	gi|460375358|ref|XP_004233473.1|/4.53952e-59/PREDICTED: uncharacterized protein LOC101251647 [Solanum lycopersicum]
Solyc02g085020	40.444	235.541	2.54198	7.79e-09	1.02e-06	K13082|1|9e-141|498|pop:POPTR_206006|bifunctional dihydroflavonol 4-reductase/flavanone 4-reductase [EC:1.1.1.219 1.1.1.234]	-	GO:0045552//dihydrokaempferol 4-reductase activity;GO:0050662//coenzyme binding;GO:0000166//nucleotide binding	GO:0009718//anthocyanin-containing compound biosynthetic process;GO:0055114//oxidation-reduction process	gi|350534658|ref|NP_001234408.1|/0/dihydroflavonol-4-reductase [Solanum lycopersicum]
Solyc05g054090	41.1874	238.796	2.5355	8.61e-09	1.1e-06	K11323|1|2e-11|65.9|vcn:VOLCADRAFT_121342|histone arginine demethylase JMJD6 [EC:1.14.11.-]	GO:0044444//cytoplasmic part	-	-	gi|460388347|ref|XP_004239829.1|/1.88267e-73/PREDICTED: uncharacterized protein LOC101250018 [Solanum lycopersicum]
Solyc11g071750	8.13191	47.0376	2.53215	0.000325463	0.00842593	K13448|1|1e-35|145|rcu:RCOM_1677910|calcium-binding protein CML	-	GO:0005509//calcium ion binding	-	gi|350537863|ref|NP_001234570.1|/4.98839e-58/regulator of gene silencing [Solanum lycopersicum]
Solyc01g106750	7.1755	41.3914	2.52818	0.000594285	0.013644	K11323|1|2e-11|70.1|vcn:VOLCADRAFT_121342|histone arginine demethylase JMJD6 [EC:1.14.11.-]	-	-	-	gi|460371096|ref|XP_004231381.1|/0/PREDICTED: uncharacterized protein LOC101253436 [Solanum lycopersicum]
Solyc01g073800	28.4865	164.149	2.52665	1.06e-07	1.01e-05	-	-	-	GO:0044763;GO:0071702;GO:0006820//anion transport;GO:0071705;GO:0006950//response to stress	gi|460366994|ref|XP_004229360.1|/4.87482e-153/PREDICTED: uncharacterized protein LOC101254632 [Solanum lycopersicum]
Solyc12g056540	22.4805	129.267	2.52361	6.6e-07	4.83e-05	K11253|1|1e-70|262|aly:ARALYDRAFT_471009|histone H3	GO:0000786//nucleosome;GO:0005634//nucleus;GO:0009536//plastid	GO:0003677//DNA binding;GO:0046982//protein heterodimerization activity	GO:0008283//cell proliferation;GO:0006334//nucleosome assembly	gi|460414483|ref|XP_004252600.1|/4.32978e-70/PREDICTED: histone H3.2-like [Solanum lycopersicum]
Solyc09g011870	262.867	1509.63	2.52178	1.65e-12	5.56e-10	K15227|1|2e-109|394|rcu:RCOM_0003340|arogenate dehydrogenase (NADP+), plant [EC:1.3.1.78]	GO:0009507//chloroplast	GO:0004665//prephenate dehydrogenase (NADP+) activity;GO:0008977//prephenate dehydrogenase activity;GO:0000166//nucleotide binding	GO:0055114//oxidation-reduction process;GO:0006571//tyrosine biosynthetic process;GO:0006567//threonine catabolic process	gi|460401710|ref|XP_004246360.1|/0/PREDICTED: arogenate dehydrogenase 2, chloroplastic-like [Solanum lycopersicum]
Solyc10g084060	41.1377	234.617	2.51178	6.75e-09	8.98e-07	-	GO:0005886//plasma membrane	-	GO:0010363//regulation of plant-type hypersensitive response;GO:0009963//positive regulation of flavonoid biosynthetic process;GO:0006612//protein targeting to membrane	gi|255581387|ref|XP_002531502.1|/9.13469e-15/conserved hypothetical protein [Ricinus communis]
Solyc10g008440	15.8377	90.2883	2.51118	7.77e-06	0.000379943	-	GO:0009506//plasmodesma;GO:0005576//extracellular region	-	GO:0009828//plant-type cell wall loosening;GO:0009826//unidimensional cell growth;GO:0019953//sexual reproduction;GO:0006949//syncytium formation	gi|460405388|ref|XP_004248158.1|/7.06855e-153/PREDICTED: expansin-B3-like [Solanum lycopersicum]
Solyc06g076060	9.35345	53.122	2.50574	0.000240912	0.00661943	-	-	-	-	gi|147777115|emb|CAN65561.1|/2.78471e-08/hypothetical protein VITISV_034985 [Vitis vinifera]
Solyc08g036640	85.4122	483.896	2.50218	8.41e-11	1.94e-08	K13464|1|2e-06|48.5|sbi:SORBI_01g033020|jasmonate ZIM domain-containing protein	-	GO:0005515//protein binding	GO:0009753//response to jasmonic acid stimulus;GO:0044249//cellular biosynthetic process;GO:1901576	gi|460398761|ref|XP_004244920.1|/2.96552e-58/PREDICTED: protein TIFY 5A-like [Solanum lycopersicum]
Solyc07g064990	12.2227	69.1587	2.50035	6.27e-05	0.00220028	K08241|1|4e-51|200|aly:ARALYDRAFT_472188|jasmonate O-methyltransferase [EC:2.1.1.141]	-	GO:0051749//indole acetic acid carboxyl methyltransferase activity;GO:0042802//identical protein binding;GO:0030795//jasmonate O-methyltransferase activity;GO:0000287//magnesium ion binding	GO:0045492//xylan biosynthetic process;GO:0009944//polarity specification of adaxial/abaxial axis;GO:0032259//methylation;GO:0010413//glucuronoxylan metabolic process;GO:0010252//auxin homeostasis	gi|460397058|ref|XP_004244085.1|/0/PREDICTED: indole-3-acetate O-methyltransferase 1-like [Solanum lycopersicum]
Solyc11g011240	17.6439	99.6659	2.49793	5.18e-06	0.000272681	K13789|1|2e-138|490|pop:POPTR_857619|geranylgeranyl diphosphate synthase, type II [EC:2.5.1.1 2.5.1.10 2.5.1.29]	-	GO:0032440//2-alkenal reductase [NAD(P)] activity;GO:0016740//transferase activity	GO:0008299//isoprenoid biosynthetic process;GO:0055114//oxidation-reduction process	gi|350538439|ref|NP_001234087.1|/0/geranylgeranyl pyrophosphate synthase 1 [Solanum lycopersicum]
Solyc08g066610	63.6678	359.132	2.49588	1.08e-09	1.87e-07	-	GO:0016023//cytoplasmic membrane-bounded vesicle;GO:0005576//extracellular region	-	GO:2000123//positive regulation of stomatal complex development;GO:0007267//cell-cell signaling;GO:0010375//stomatal complex patterning;GO:0016556//mRNA modification	gi|460399741|ref|XP_004245395.1|/1.38528e-55/PREDICTED: uncharacterized protein LOC101250825 [Solanum lycopersicum]
Solyc12g006840	49.1607	276.532	2.49187	4.33e-09	6.16e-07	K04733|1|3e-59|228|smo:SELMODRAFT_159261|interleukin-1 receptor-associated kinase 4 [EC:2.7.11.1];K13430|3|1e-58|226|osa:4329463|serine/threonine-protein kinase PBS1 [EC:2.7.11.1]	-	GO:0005488//binding;GO:0016301//kinase activity	-	gi|460413349|ref|XP_004252052.1|/0/PREDICTED: G-type lectin S-receptor-like serine/threonine-protein kinase CES101-like [Solanum lycopersicum]
Solyc12g087940	1147.43	6441.97	2.48909	5.88e-13	2.33e-10	K00924|1|2e-26|118|ath:AT5G22850|[EC:2.7.1.-]	GO:0009505//plant-type cell wall;GO:0048046//apoplast	GO:0004190//aspartic-type endopeptidase activity	GO:0006508//proteolysis	gi|460414727|ref|XP_004252715.1|/0/PREDICTED: protein ASPARTIC PROTEASE IN GUARD CELL 1-like [Solanum lycopersicum]
Solyc01g079670	14.6682	81.7784	2.47903	1.93e-05	0.000822169	-	-	-	-	gi|460367396|ref|XP_004229560.1|/3.78554e-81/PREDICTED: uncharacterized protein LOC101244226 [Solanum lycopersicum]
Solyc04g024780	22.0567	122.693	2.47576	9.77e-07	6.72e-05	-	-	-	GO:0009719;GO:0010033//response to organic substance;GO:0006950//response to stress;GO:0007165//signal transduction;GO:0080167//response to karrikin	gi|460385936|ref|XP_004238656.1|/9.13967e-72/PREDICTED: uncharacterized protein LOC101248673 [Solanum lycopersicum]
Solyc07g055950	652.36	3622.89	2.4734	1.56e-12	5.33e-10	K14709|1|3e-09|60.5|vcn:VOLCADRAFT_104214|solute carrier family 39 (zinc transporter), member 1/2/3	GO:0005829//cytosol;GO:0005886//plasma membrane	-	GO:0044763;GO:0046686//response to cadmium ion	gi|460395318|ref|XP_004243231.1|/1.6347e-154/PREDICTED: protodermal factor 1-like [Solanum lycopersicum]
Solyc10g079350	214.336	1174.93	2.45463	1.43e-11	3.88e-09	K13495|1|1e-150|531|pop:POPTR_560466|cis-zeatin O-glucosyltransferase [EC:2.4.1.215]	-	GO:0016758//transferase activity, transferring hexosyl groups	-	gi|460407578|ref|XP_004249229.1|/0/PREDICTED: zeatin O-glucosyltransferase-like [Solanum lycopersicum]
Solyc01g106340	7.6537	41.8935	2.4525	0.000769852	0.0165937	K02433|1|1e-44|179|cre:CHLREDRAFT_188401|aspartyl-tRNA(Asn)/glutamyl-tRNA (Gln) amidotransferase subunit A [EC:6.3.5.6 6.3.5.7]	GO:0005794//Golgi apparatus;GO:0005886//plasma membrane;GO:0005774//vacuolar membrane;GO:0005783//endoplasmic reticulum	GO:0016884//carbon-nitrogen ligase activity, with glutamine as amido-N-donor;GO:0047412//N-(long-chain-acyl)ethanolamine deacylase activity;GO:0016740//transferase activity;GO:0004040//amidase activity	GO:0042742//defense response to bacterium;GO:0070291//N-acylethanolamine metabolic process	gi|460369387|ref|XP_004230544.1|/0/PREDICTED: fatty acid amide hydrolase-like [Solanum lycopersicum]
Solyc12g005620	19.7698	107.253	2.43964	4.67e-06	0.000253458	K13415|1|2e-52|205|pop:POPTR_650846|protein brassinosteroid insensitive 1 [EC:2.7.10.1 2.7.11.1]	-	-	-	gi|110433339|gb|ABG74351.1|/0/ethylene-inducing xylanase [Solanum lycopersicum]
Solyc01g010200	156.57	840.914	2.42515	4.97e-11	1.18e-08	-	-	-	-	gi|460365047|ref|XP_004228417.1|/1.1864e-83/PREDICTED: uncharacterized protein LOC101259868 [Solanum lycopersicum]
Solyc05g054610	63.0335	338.197	2.42367	2.39e-09	3.61e-07	K11254|1|2e-53|204|mtr:MTR_2g096100|histone H4	GO:0005829//cytosol;GO:0000786//nucleosome;GO:0005739//mitochondrion;GO:0005730//nucleolus;GO:0009506//plasmodesma;GO:0005774//vacuolar membrane;GO:0009579//thylakoid;GO:0009507//chloroplast;GO:0005794//Golgi apparatus;GO:0005886//plasma membrane	GO:0003677//DNA binding;GO:0046982//protein heterodimerization activity	GO:0009414//response to water deprivation;GO:0006334//nucleosome assembly	gi|350539093|ref|NP_001234118.1|/1.41921e-52/histone H4 [Solanum lycopersicum]
Solyc03g083490	7.38857	39.5022	2.41857	0.000930887	0.0191871	-	-	-	-	gi|460378375|ref|XP_004234948.1|/5.92341e-119/PREDICTED: uncharacterized protein LOC101252469 [Solanum lycopersicum]
Solyc11g072860	349.91	1869.95	2.41794	9.84e-12	2.77e-09	K11254|1|2e-53|204|mtr:MTR_2g096100|histone H4	GO:0005829//cytosol;GO:0000786//nucleosome;GO:0005739//mitochondrion;GO:0005730//nucleolus;GO:0009506//plasmodesma;GO:0005774//vacuolar membrane;GO:0009579//thylakoid;GO:0009507//chloroplast;GO:0005794//Golgi apparatus;GO:0005886//plasma membrane	GO:0003677//DNA binding;GO:0046982//protein heterodimerization activity	GO:0009414//response to water deprivation;GO:0006334//nucleosome assembly	gi|350539093|ref|NP_001234118.1|/1.41921e-52/histone H4 [Solanum lycopersicum]
Solyc09g090080	184.311	984.243	2.41687	3.85e-11	9.3e-09	K08176|1|0.0|868|pop:POPTR_831623|MFS transporter, PHS family, inorganic phosphate transporter	-	-	-	gi|460404519|ref|XP_004247729.1|/0/PREDICTED: probable inorganic phosphate transporter 1-7-like [Solanum lycopersicum]
Solyc01g074000	163.852	872.927	2.41347	5e-11	1.18e-08	K11253|1|5e-71|263|aly:ARALYDRAFT_471009|histone H3	GO:0000786//nucleosome;GO:0005634//nucleus;GO:0009536//plastid	GO:0003677//DNA binding;GO:0046982//protein heterodimerization activity	GO:0008283//cell proliferation;GO:0006334//nucleosome assembly	gi|470105592|ref|XP_004289166.1|/5.65486e-70/PREDICTED: histone H3.2-like [Fragaria vesca subsp. vesca]
Solyc12g056920	24.6608	131.199	2.41146	1.07e-06	7.24e-05	-	GO:0016021//integral to membrane	GO:0008271//secondary active sulfate transmembrane transporter activity	GO:0008272//sulfate transport;GO:0055085//transmembrane transport	gi|460414365|ref|XP_004252542.1|/0/PREDICTED: sulfate transporter 2.1-like [Solanum lycopersicum]
Solyc02g071090	26.5192	140.134	2.4017	1.1e-06	7.41e-05	-	GO:0016020//membrane	GO:0005345//purine nucleobase transmembrane transporter activity	GO:0006863//purine nucleobase transport;GO:0009624//response to nematode;GO:0015931//nucleobase-containing compound transport	gi|460374578|ref|XP_004233087.1|/0/PREDICTED: probable purine permease 9-like [Solanum lycopersicum]
Solyc01g073880	90.4001	477.583	2.40135	8.65e-10	1.55e-07	-	-	-	GO:0006952//defense response;GO:0015706//nitrate transport;GO:0044763;GO:0044710;GO:0071702;GO:0044767;GO:0002376//immune system process;GO:0010167//response to nitrate	gi|224120914|ref|XP_002330857.1|/2.67631e-45/predicted protein [Populus trichocarpa]
Solyc04g005130	7.91883	41.821	2.40087	0.0011188	0.0220199	K12126|1|9e-14|75.1|ath:AT1G09530|phytochrome-interacting factor 3;K10863|3|1e-06|51.2|ath:AT5G01310|aprataxin [EC:3.-.-.-]	-	GO:0046983//protein dimerization activity	-	gi|460382692|ref|XP_004237071.1|/2.72763e-128/PREDICTED: transcription factor bHLH79-like [Solanum lycopersicum]
Solyc01g104230	13.4987	70.9753	2.3945	7.92e-05	0.00267931	-	GO:0009506//plasmodesma;GO:0005634//nucleus	-	GO:0010389//regulation of G2/M transition of mitotic cell cycle;GO:0016572//histone phosphorylation;GO:0006270//DNA replication initiation;GO:0008283//cell proliferation;GO:0006275//regulation of DNA replication	gi|460369304|ref|XP_004230503.1|/0/PREDICTED: F-box protein At1g10780-like [Solanum lycopersicum]
Solyc05g050350	62.7114	329.092	2.39169	6.31e-09	8.53e-07	K05391|1|0.0|899|rcu:RCOM_1579800|cyclic nucleotide gated channel, other eukaryote	GO:0005886//plasma membrane	GO:0030551//cyclic nucleotide binding;GO:0005242//inward rectifier potassium channel activity;GO:0005221//intracellular cyclic nucleotide activated cation channel activity;GO:0005516//calmodulin binding	GO:0006816//calcium ion transport;GO:0006813//potassium ion transport	gi|460389257|ref|XP_004240273.1|/0/PREDICTED: cyclic nucleotide-gated ion channel 1-like [Solanum lycopersicum]
Solyc02g088830	56.8664	298.066	2.38998	9.7e-09	1.22e-06	-	GO:0005634//nucleus	-	GO:0000226//microtubule cytoskeleton organization;GO:0010583//response to cyclopentenone;GO:0000911//cytokinesis by cell plate formation	gi|460372698|ref|XP_004232163.1|/2.95525e-58/PREDICTED: uncharacterized protein LOC101260290 [Solanum lycopersicum]
Solyc05g055960	10.8946	56.9259	2.38547	0.000284152	0.00752811	-	-	-	-	gi|460388063|ref|XP_004239691.1|/1.55316e-90/PREDICTED: ankyrin repeat-containing protein At3g12360-like [Solanum lycopersicum]
Solyc04g072030	75.6278	394.349	2.38248	2.19e-09	3.37e-07	K01528|1|3e-44|178|cme:CME019C|dynamin GTPase [EC:3.6.5.5]	-	GO:0003924//GTPase activity;GO:0005525//GTP binding	GO:0006184//GTP catabolic process	gi|460384275|ref|XP_004237838.1|/0/PREDICTED: dynamin-related protein 4C-like [Solanum lycopersicum]
Solyc03g082520	141.422	736.674	2.38102	1.79e-10	3.93e-08	K14488|1|2e-32|135|mtr:MTR_3g092220|SAUR family protein	-	-	-	gi|460378501|ref|XP_004235009.1|/8.73383e-71/PREDICTED: indole-3-acetic acid-induced protein ARG7-like [Solanum lycopersicum]
Solyc01g091660	11.2142	58.3258	2.37881	0.000208318	0.00592931	K13070|1|1e-65|247|osa:4335093|momilactone-A synthase [EC:1.1.1.295];K09841|2|1e-61|234|bdi:100827045|xanthoxin dehydrogenase [EC:1.1.1.288]	GO:0005737//cytoplasm	GO:0016491//oxidoreductase activity;GO:0005488//binding	GO:0008152//metabolic process	gi|460367958|ref|XP_004229837.1|/1.96832e-139/PREDICTED: short-chain dehydrogenase reductase 3b-like isoform 2 [Solanum lycopersicum]
Solyc01g006930	99.4884	513.575	2.36798	9.64e-10	1.71e-07	K08064|1|6e-25|112|gmx:100782085|nuclear transcription factor Y, alpha	-	-	-	gi|460365538|ref|XP_004228658.1|/0/PREDICTED: nuclear transcription factor Y subunit A-10-like [Solanum lycopersicum]
Solyc01g066040	8.50357	43.7272	2.36239	0.00100277	0.0202565	-	-	-	-	-
Solyc02g086450	7.54716	38.5661	2.35333	0.00171544	0.0303703	-	-	GO:0005515//protein binding	-	gi|460373033|ref|XP_004232327.1|/3.24225e-57/PREDICTED: uncharacterized protein LOC101259901 [Solanum lycopersicum]
Solyc02g093280	19.1851	97.8109	2.35001	1.57e-05	0.000696344	K12126|1|8e-28|122|aly:ARALYDRAFT_471048|phytochrome-interacting factor 3;K13422|3|9e-09|59.7|rcu:RCOM_0864470|transcription factor MYC2	-	GO:0005515//protein binding	GO:0050789//regulation of biological process;GO:0009628//response to abiotic stimulus;GO:0009908//flower development	gi|460375617|ref|XP_004233601.1|/1.7332e-170/PREDICTED: transcription factor SPATULA-like [Solanum lycopersicum]
Solyc01g080600	125.321	637.178	2.34607	4.03e-10	8.14e-08	K11253|1|5e-71|263|aly:ARALYDRAFT_471009|histone H3	GO:0000786//nucleosome;GO:0005634//nucleus;GO:0009536//plastid	GO:0003677//DNA binding;GO:0046982//protein heterodimerization activity	GO:0008283//cell proliferation;GO:0006334//nucleosome assembly	gi|470105592|ref|XP_004289166.1|/5.65486e-70/PREDICTED: histone H3.2-like [Fragaria vesca subsp. vesca]
Solyc02g063540	6.85589	34.8048	2.34387	0.00308214	0.0470286	K01762|1|2e-135|479|vvi:100258512|1-aminocyclopropane-1-carboxylate synthase [EC:4.4.1.14]	GO:0005737//cytoplasm	GO:0008483//transaminase activity;GO:0016847//1-aminocyclopropane-1-carboxylate synthase activity;GO:0030170//pyridoxal phosphate binding	GO:0042218//1-aminocyclopropane-1-carboxylate biosynthetic process;GO:0009693//ethylene biosynthetic process;GO:0006417//regulation of translation;GO:0009735//response to cytokinin stimulus;GO:0009733//response to auxin stimulus;GO:0009835//fruit ripening	gi|350538503|ref|NP_001234346.1|/1.1191e-162/1-aminocyclopropane-1-carboxylate synthase [Solanum lycopersicum]
Solyc05g054250	62.1243	314.515	2.3399	2.06e-08	2.41e-06	-	GO:0005576//extracellular region;GO:0009506//plasmodesma;GO:0005634//nucleus	-	-	gi|297736871|emb|CBI26072.3|/1.15528e-12/unnamed protein product [Vitis vinifera]
Solyc07g008210	23.6524	119.413	2.3359	2.6e-06	0.000154305	-	-	-	-	gi|460394377|ref|XP_004242780.1|/3.73108e-133/PREDICTED: uncharacterized protein LOC101248118 [Solanum lycopersicum]
Solyc04g014350	81.5769	409.62	2.32805	5.28e-09	7.37e-07	-	-	-	-	gi|460381938|ref|XP_004236698.1|/1.57812e-11/PREDICTED: uncharacterized protein LOC101245638 [Solanum lycopersicum]
Solyc04g078140	21.7916	109.091	2.32368	5.67e-06	0.000294146	K00360|1|2e-12|69.7|ppp:PHYPADRAFT_184973|nitrate reductase (NADH) [EC:1.7.1.1];K13076|4|3e-09|58.9|sbi:SORBI_03g025270|delta8-fatty-acid desaturase [EC:1.14.19.4]	GO:0005789//endoplasmic reticulum membrane	GO:0046872//metal ion binding;GO:0020037//heme binding	GO:0042742//defense response to bacterium;GO:0019745//pentacyclic triterpenoid biosynthetic process;GO:0016126//sterol biosynthetic process	gi|460384826|ref|XP_004238109.1|/1.72723e-82/PREDICTED: cytochrome B5 isoform D-like [Solanum lycopersicum]
Solyc06g035530	14.6682	73.3795	2.32269	8.97e-05	0.00296241	K05282|1|5e-157|551|rcu:RCOM_1498120|gibberellin 20-oxidase [EC:1.14.11.12]	-	GO:0005506//iron ion binding;GO:0016706//oxidoreductase activity, acting on paired donors, with incorporation or reduction of molecular oxygen, 2-oxoglutarate as one donor, and incorporation of one atom each of oxygen into both donors	GO:0055114//oxidation-reduction process	gi|350539059|ref|NP_001234628.1|/0/gibberellin 20-oxidase-2 [Solanum lycopersicum]
Solyc04g079250	120.274	600.408	2.31962	6.51e-10	1.21e-07	-	-	GO:0016787//hydrolase activity	GO:0006629//lipid metabolic process	gi|460384964|ref|XP_004238176.1|/0/PREDICTED: patatin group A-3-like [Solanum lycopersicum]
Solyc12g005700	7.54716	37.6045	2.3169	0.00215094	0.0359333	-	-	-	-	gi|460412230|ref|XP_004251505.1|/3.22339e-89/PREDICTED: uncharacterized protein LOC101244745 [Solanum lycopersicum]
Solyc11g072840	124.417	619.831	2.31669	7.34e-10	1.35e-07	K11254|1|1e-52|202|mtr:MTR_2g096100|histone H4	GO:0005829//cytosol;GO:0000786//nucleosome;GO:0005739//mitochondrion;GO:0005730//nucleolus;GO:0009506//plasmodesma;GO:0005774//vacuolar membrane;GO:0009579//thylakoid;GO:0009507//chloroplast;GO:0005794//Golgi apparatus;GO:0005886//plasma membrane	GO:0003677//DNA binding;GO:0046982//protein heterodimerization activity	GO:0009414//response to water deprivation;GO:0006334//nucleosome assembly	gi|460411793|ref|XP_004251290.1|/2.4208e-52/PREDICTED: histone H4-like [Solanum lycopersicum]
Solyc04g071500	18.5483	92.1988	2.31346	2.28e-05	0.000945002	K01183|1|1e-05|48.5|rcu:RCOM_0922130|chitinase [EC:3.2.1.14]	GO:0031225//anchored to membrane	-	-	gi|460385594|ref|XP_004238488.1|/1.31804e-136/PREDICTED: uncharacterized protein LOC101252389 [Solanum lycopersicum]
Solyc02g080330	97.6325	484.812	2.31199	1.81e-09	2.85e-07	K00517|1|0.0|852|vvi:100246851|[EC:1.14.-.-]	GO:0005886//plasma membrane	GO:0020037//heme binding;GO:0005506//iron ion binding;GO:0009055//electron carrier activity;GO:0070330//aromatase activity;GO:0019825//oxygen binding	GO:0055114//oxidation-reduction process	gi|460376006|ref|XP_004233793.1|/0/PREDICTED: cytochrome P450 77A3-like [Solanum lycopersicum]
Solyc10g080950	9.08832	45.1057	2.31123	0.00100365	0.0202565	K05868|1|1e-163|574|vvi:100261859|cyclin B	-	-	GO:0051726//regulation of cell cycle	gi|460407770|ref|XP_004249323.1|/0/PREDICTED: G2/mitotic-specific cyclin-1-like [Solanum lycopersicum]
Solyc06g072240	10.2578	50.7306	2.30614	0.000542824	0.0127123	K11254|1|2e-53|204|mtr:MTR_2g096100|histone H4	GO:0005829//cytosol;GO:0000786//nucleosome;GO:0005739//mitochondrion;GO:0005730//nucleolus;GO:0009506//plasmodesma;GO:0005774//vacuolar membrane;GO:0009579//thylakoid;GO:0009507//chloroplast;GO:0005794//Golgi apparatus;GO:0005886//plasma membrane	GO:0003677//DNA binding;GO:0046982//protein heterodimerization activity	GO:0009414//response to water deprivation;GO:0006334//nucleosome assembly	gi|350539093|ref|NP_001234118.1|/1.41921e-52/histone H4 [Solanum lycopersicum]
Solyc05g009270	141.261	696.67	2.30212	7.87e-10	1.43e-07	K15397|1|0.0|771|gmx:100815887|3-ketoacyl-CoA synthase [EC:2.3.1.-]	GO:0016020//membrane;GO:0005783//endoplasmic reticulum	GO:0009922//fatty acid elongase activity	GO:0010155//regulation of proton transport;GO:0009072//aromatic amino acid family metabolic process;GO:0010218//response to far red light;GO:0000096//sulfur amino acid metabolic process;GO:0009744//response to sucrose stimulus;GO:0016117//carotenoid biosynthetic process;GO:0000038//very long-chain fatty acid metabolic process;GO:0006636//unsaturated fatty acid biosynthetic process;GO:0009793//emb…	gi|460386472|ref|XP_004238922.1|/0/PREDICTED: 3-ketoacyl-CoA synthase 6-like [Solanum lycopersicum]
Solyc05g013690	314.623	1549.73	2.30032	1.01e-10	2.26e-08	K01206|1|2e-134|476|ath:AT1G67830|alpha-L-fucosidase [EC:3.2.1.51];K00514|3|3e-36|150|rcu:RCOM_1428040|zeta-carotene desaturase [EC:1.3.5.6]	GO:0009505//plant-type cell wall	GO:0016788//hydrolase activity, acting on ester bonds;GO:0004560//alpha-L-fucosidase activity	GO:0006629//lipid metabolic process	gi|460386915|ref|XP_004239139.1|/0/PREDICTED: GDSL esterase/lipase At3g26430-like [Solanum lycopersicum]
Solyc09g092760	46.6631	228.843	2.294	1.11e-07	1.05e-05	K12741|1|6e-12|67.4|ath:AT5G40490|heterogeneous nuclear ribonucleoprotein A1/A3	-	-	-	gi|460404897|ref|XP_004247915.1|/8.73217e-42/PREDICTED: uncharacterized protein LOC101257603 isoform 1 [Solanum lycopersicum]
Solyc12g011010	1108.15	5418.09	2.28964	2.88e-11	7.28e-09	K14709|1|9e-25|112|vcn:VOLCADRAFT_104214|solute carrier family 39 (zinc transporter), member 1/2/3	GO:0005829//cytosol;GO:0005886//plasma membrane	-	GO:0050789//regulation of biological process;GO:0044763;GO:0048856//anatomical structure development;GO:0040007//growth;GO:0044767;GO:0046686//response to cadmium ion	gi|460412857|ref|XP_004251814.1|/0/PREDICTED: uncharacterized protein LOC101261198 [Solanum lycopersicum]
Solyc02g070210	36.1922	176.862	2.28887	6.25e-07	4.64e-05	-	GO:0005829//cytosol;GO:0005634//nucleus;GO:0005886//plasma membrane	-	GO:0052546//cell wall pectin metabolic process;GO:0052541//plant-type cell wall cellulose metabolic process;GO:0016126//sterol biosynthetic process	gi|460374696|ref|XP_004233146.1|/0/PREDICTED: patellin-4-like [Solanum lycopersicum]
Solyc10g084070	21.2589	103.87	2.28863	1.27e-05	0.000575783	-	-	-	-	gi|460408102|ref|XP_004249486.1|/8.41142e-21/PREDICTED: uncharacterized protein LOC101246979 [Solanum lycopersicum]
Solyc06g008980	10.8946	53.1561	2.28662	0.000616747	0.0140004	-	-	-	GO:0016572//histone phosphorylation;GO:0000911//cytokinesis by cell plate formation;GO:0042127//regulation of cell proliferation;GO:0000226//microtubule cytoskeleton organization	gi|460389796|ref|XP_004240534.1|/0/PREDICTED: uncharacterized protein LOC101255795 [Solanum lycopersicum]
Solyc05g055680	94.1216	454.513	2.27172	5.46e-09	7.57e-07	-	-	-	-	gi|460409303|ref|XP_004250078.1|/2.85584e-49/PREDICTED: uncharacterized protein LOC101250852 [Solanum lycopersicum]
Solyc03g121900	5994.87	28938	2.27116	2.71e-11	6.91e-09	-	-	-	-	gi|460381285|ref|XP_004236382.1|/1.89434e-57/PREDICTED: putative lipid-transfer protein DIR1-like [Solanum lycopersicum]
Solyc07g054720	11.0011	53.0835	2.27061	0.000615474	0.0140001	-	-	-	-	gi|460395484|ref|XP_004243313.1|/9.64734e-41/PREDICTED: proteinase inhibitor type-2 CEVI57-like [Solanum lycopersicum]
Solyc02g094000	420.496	2022.57	2.26602	9.69e-11	2.2e-08	K13448|1|3e-49|191|rcu:RCOM_1677910|calcium-binding protein CML	-	GO:0005509//calcium ion binding	-	gi|460371934|ref|XP_004231789.1|/3.03337e-79/PREDICTED: putative calcium-binding protein CML19-like [Solanum lycopersicum]
Solyc09g057960	48.1498	231.393	2.26474	1.78e-07	1.52e-05	-	GO:0005576//extracellular region;GO:0016023//cytoplasmic membrane-bounded vesicle	-	GO:0080167//response to karrikin	gi|460403598|ref|XP_004247276.1|/2.4122e-153/PREDICTED: cysteine-rich repeat secretory protein 55-like [Solanum lycopersicum]
Solyc02g080670	111.872	537.47	2.26433	3.17e-09	4.72e-07	K00423|1|3e-170|596|aly:ARALYDRAFT_892557|L-ascorbate oxidase [EC:1.10.3.3]	GO:0009506//plasmodesma;GO:0009505//plant-type cell wall;GO:0005576//extracellular region;GO:0016020//membrane	GO:0005507//copper ion binding;GO:0008447//L-ascorbate oxidase activity	GO:0009825//multidimensional cell growth;GO:0055114//oxidation-reduction process;GO:0048767//root hair elongation;GO:0000271//polysaccharide biosynthetic process;GO:0009932//cell tip growth;GO:0010075//regulation of meristem growth;GO:0071555//cell wall organization;GO:0043481//anthocyanin accumulation in tissues in response to UV light;GO:0010817//regulation of hormone levels;GO:0048653//anther …	gi|460373799|ref|XP_004232701.1|/0/PREDICTED: L-ascorbate oxidase homolog [Solanum lycopersicum]
Solyc04g078310	11.6924	55.9984	2.25981	0.000455475	0.0111366	K06627|1|1e-139|494|pop:POPTR_709971|cyclin A	GO:0005737//cytoplasm;GO:0005634//nucleus	GO:0019901//protein kinase binding	GO:0000079//regulation of cyclin-dependent protein serine/threonine kinase activity;GO:0051301//cell division	gi|460384843|ref|XP_004238117.1|/0/PREDICTED: cyclin-A3-2-like [Solanum lycopersicum]
Solyc03g115200	294.268	1399.15	2.24935	2.8e-10	5.99e-08	K14489|1|3e-14|76.3|vvi:100263145|arabidopsis histidine kinase 2/3/4 (cytokinin receptor) [EC:2.7.13.3]	GO:0005886//plasma membrane	-	-	gi|460380558|ref|XP_004236022.1|/3.86313e-107/PREDICTED: glucan endo-1,3-beta-glucosidase-like protein 3-like [Solanum lycopersicum]
Solyc12g088530	40.283	190.775	2.24363	7.63e-07	5.48e-05	K06627|1|2e-135|480|rcu:RCOM_1588500|cyclin A	GO:0005737//cytoplasm;GO:0005634//nucleus	GO:0019901//protein kinase binding	GO:0000079//regulation of cyclin-dependent protein serine/threonine kinase activity;GO:0051301//cell division	gi|460414793|ref|XP_004252747.1|/0/PREDICTED: putative cyclin-A3-1-like [Solanum lycopersicum]
Solyc02g067600	56.6013	267.426	2.24023	8.86e-08	8.74e-06	-	-	-	-	-
Solyc06g065820	13.7663	64.8611	2.23622	0.000181302	0.00531647	K09286|1|2e-19|94.0|zma:100283213|EREBP-like factor	GO:0005634//nucleus	GO:0003677//DNA binding;GO:0003700//sequence-specific DNA binding transcription factor activity	GO:0010162//seed dormancy process;GO:0006952//defense response;GO:0006355//regulation of transcription, DNA-dependent;GO:0009740//gibberellic acid mediated signaling pathway;GO:0009835//fruit ripening;GO:0009873//ethylene mediated signaling pathway	gi|350539962|ref|NP_001234848.1|/2.76498e-115/ethylene response factor 1 [Solanum lycopersicum]
Solyc03g044100	172.088	809.782	2.23438	1.12e-09	1.9e-07	K00430|1|8e-143|504|vvi:100266458|peroxidase [EC:1.11.1.7]	GO:0005737//cytoplasm	GO:0020037//heme binding;GO:0046872//metal ion binding;GO:0004601//peroxidase activity	GO:0009651//response to salt stress;GO:0055114//oxidation-reduction process;GO:0006979//response to oxidative stress	gi|460377756|ref|XP_004234654.1|/0/PREDICTED: peroxidase 51-like [Solanum lycopersicum]
Solyc06g007190	1005.63	4729.96	2.23372	8.03e-11	1.88e-08	K01090|1|4e-92|336|sbi:SORBI_01g038410|protein phosphatase [EC:3.1.3.16];K14497|2|2e-40|164|bdi:100838998|protein phosphatase 2C [EC:3.1.3.16]	-	GO:0016787//hydrolase activity	-	gi|460389536|ref|XP_004240408.1|/0/PREDICTED: probable protein phosphatase 2C 2-like [Solanum lycopersicum]
Solyc02g087980	13.4987	63.4655	2.23315	0.000325636	0.00842593	K06675|1|0.0|1902|rcu:RCOM_0100760|structural maintenance of chromosome 4	GO:0000785//chromatin;GO:0005737//cytoplasm;GO:0005819//spindle;GO:0016363//nuclear matrix;GO:0009506//plasmodesma;GO:0008278//cohesin complex	GO:0005215//transporter activity;GO:0003682//chromatin binding;GO:0005524//ATP binding	GO:0031048//chromatin silencing by small RNA;GO:0006346//methylation-dependent chromatin silencing;GO:0006275//regulation of DNA replication;GO:0007131//reciprocal meiotic recombination;GO:0000911//cytokinesis by cell plate formation;GO:0051567//histone H3-K9 methylation;GO:0010389//regulation of G2/M transition of mitotic cell cycle;GO:0008283//cell proliferation;GO:0051607//defense response to …	gi|460375778|ref|XP_004233681.1|/0/PREDICTED: structural maintenance of chromosomes protein 4-like [Solanum lycopersicum]
Solyc01g088400	88.0636	413.365	2.2308	1.33e-08	1.6e-06	K15404|1|0.0|942|pop:POPTR_732680|aldehyde decarbonylase [EC:4.1.99.5]	GO:0016021//integral to membrane;GO:0043668//exine	GO:0016491//oxidoreductase activity;GO:0071771//aldehyde decarbonylase activity;GO:0005506//iron ion binding	GO:0010025//wax biosynthetic process;GO:0042335//cuticle development;GO:0055114//oxidation-reduction process;GO:0046185//aldehyde catabolic process;GO:0010143//cutin biosynthetic process;GO:0048653//anther development	gi|460367675|ref|XP_004229696.1|/0/PREDICTED: protein ECERIFERUM 1-like [Solanum lycopersicum]
Solyc05g015330	16.4224	76.6472	2.22257	0.000110407	0.00351672	K03004|1|3e-23|105|sbi:SORBI_03g003610|DNA-directed RNA polymerase I subunit RPA43;K03506|3|3e-07|52.4|olu:OSTLU_19031|DNA polymerase epsilon subunit 4 [EC:2.7.7.7]	GO:0005634//nucleus	GO:0003700//sequence-specific DNA binding transcription factor activity;GO:0043565//sequence-specific DNA binding;GO:0046982//protein heterodimerization activity	GO:0006355//regulation of transcription, DNA-dependent	gi|460387708|ref|XP_004239516.1|/1.76213e-71/PREDICTED: nuclear transcription factor Y subunit C-4-like [Solanum lycopersicum]
Solyc01g086820	255.903	1189.34	2.2165	5.18e-10	1e-07	K11253|1|5e-71|263|aly:ARALYDRAFT_471009|histone H3	GO:0000786//nucleosome;GO:0005634//nucleus;GO:0009536//plastid	GO:0003677//DNA binding;GO:0046982//protein heterodimerization activity	GO:0008283//cell proliferation;GO:0006334//nucleosome assembly	gi|470105592|ref|XP_004289166.1|/5.65486e-70/PREDICTED: histone H3.2-like [Fragaria vesca subsp. vesca]
Solyc06g048700	296.344	1371.97	2.2109	4.82e-10	9.47e-08	-	-	-	-	-
Solyc05g013370	17.3788	80.4127	2.21009	9.67e-05	0.00314859	-	-	-	-	gi|224100607|ref|XP_002311944.1|/2.81887e-11/predicted protein [Populus trichocarpa]
Solyc02g092890	44.3217	204.016	2.2026	8.19e-07	5.81e-05	-	-	-	-	gi|462402045|gb|EMJ07602.1|/3.11924e-07/hypothetical protein PRUPE_ppa016650mg [Prunus persica]
Solyc11g008690	59.8422	274.022	2.19505	1.47e-07	1.32e-05	-	GO:0009507//chloroplast;GO:0005739//mitochondrion	-	GO:0016572//histone phosphorylation	gi|460409303|ref|XP_004250078.1|/8.74035e-106/PREDICTED: uncharacterized protein LOC101250852 [Solanum lycopersicum]
Solyc04g077270	496.865	2249.57	2.17872	3.93e-10	8.04e-08	K04733|1|5e-56|218|smo:SELMODRAFT_33807|interleukin-1 receptor-associated kinase 4 [EC:2.7.11.1];K13430|2|9e-55|213|zma:100283091|serine/threonine-protein kinase PBS1 [EC:2.7.11.1]	-	GO:0004672//protein kinase activity;GO:0000166//nucleotide binding	GO:0016310//phosphorylation	gi|460385731|ref|XP_004238555.1|/0/PREDICTED: uncharacterized protein LOC101251977 [Solanum lycopersicum]
Solyc06g060760	676.024	3042.67	2.17019	3.1e-10	6.56e-08	K09873|1|1e-119|426|ath:AT4G17340|aquaporin TIP	GO:0016021//integral to membrane;GO:0009705//plant-type vacuole membrane;GO:0042807//central vacuole;GO:0009507//chloroplast;GO:0005886//plasma membrane	GO:0015250//water channel activity;GO:0051739//ammonia transmembrane transporter activity;GO:0015200//methylammonium transmembrane transporter activity	GO:0015706//nitrate transport;GO:0072489//methylammonium transmembrane transport;GO:0006833//water transport;GO:0010167//response to nitrate	gi|460392791|ref|XP_004241997.1|/3.44503e-138/PREDICTED: probable aquaporin TIP-type RB7-5A [Solanum lycopersicum]
Solyc07g056360	11.3207	50.7477	2.16437	0.000977235	0.0198841	-	GO:0005634//nucleus	GO:0003712//transcription cofactor activity	GO:0007623//circadian rhythm;GO:0009641//shade avoidance;GO:0045892//negative regulation of transcription, DNA-dependent;GO:0032502//developmental process	gi|255575289|ref|XP_002528548.1|/7.56985e-22/conserved hypothetical protein [Ricinus communis]
Solyc03g095500	173.364	773.947	2.15843	3.8e-09	5.55e-07	K03671|1|1e-38|155|mtr:MTR_4g111950|thioredoxin 1	GO:0043231//intracellular membrane-bounded organelle;GO:0005829//cytosol	GO:0009055//electron carrier activity;GO:0003756//protein disulfide isomerase activity;GO:0015035//protein disulfide oxidoreductase activity	GO:0006457//protein folding;GO:0045454//cell redox homeostasis;GO:0006662//glycerol ether metabolic process	gi|460378931|ref|XP_004235220.1|/3.37929e-78/PREDICTED: thioredoxin H-type-like [Solanum lycopersicum]
Solyc09g082660	136.104	605.986	2.15457	1.1e-08	1.35e-06	K00588|1|2e-87|320|vvi:100250567|caffeoyl-CoA O-methyltransferase [EC:2.1.1.104];K13067|4|6e-74|275|ath:AT1G67990|putative caffeoyl-CoA 3-O-methyltransferase [EC:2.1.1.-]	-	GO:0042409//caffeoyl-CoA O-methyltransferase activity;GO:0080076//caffeoyl CoA:S-adenosyl-L-methionine O-methyltransferase activity;GO:0080012//trihydroxyferuloyl spermidine O-methyltransferase activity;GO:0080077//trihydroxyferuloyl spermidine:S-adenosyl-L-methionine O-methyltransferase activity;GO:0080078//tricaffeoyl spermidine:S-adenosyl-L-methionine O-methyltransferase activity	GO:0080088//spermidine hydroxycinnamate conjugate biosynthetic process;GO:0032259//methylation;GO:0048316//seed development	gi|460404255|ref|XP_004247599.1|/6.88534e-130/PREDICTED: putative caffeoyl-CoA O-methyltransferase At1g67980-like isoform 1 [Solanum lycopersicum]
Solyc01g079660	533.384	2371.54	2.15258	4.87e-10	9.48e-08	-	-	GO:0016491//oxidoreductase activity;GO:0005488//binding	-	gi|460367092|ref|XP_004229409.1|/1.87917e-109/PREDICTED: uncharacterized protein LOC101247750 [Solanum lycopersicum]
Solyc08g036660	139.457	619.108	2.15037	8.34e-09	1.08e-06	K13464|1|6e-08|53.9|aly:ARALYDRAFT_488138|jasmonate ZIM domain-containing protein	-	-	-	gi|460398763|ref|XP_004244921.1|/2.62592e-67/PREDICTED: protein TIFY 5A-like [Solanum lycopersicum]
Solyc07g041770	47.9936	212.977	2.14978	5.55e-07	4.19e-05	-	-	-	-	gi|460396297|ref|XP_004243712.1|/8.99498e-117/PREDICTED: uncharacterized protein LOC101254009 [Solanum lycopersicum]
Solyc02g062170	14.0314	62.0828	2.14554	0.000412009	0.010243	-	-	-	GO:0044699	gi|460375523|ref|XP_004233555.1|/7.61564e-123/PREDICTED: uncharacterized protein LOC101251248 [Solanum lycopersicum]
Solyc03g115050	29.5494	130.658	2.1446	1.06e-05	0.000494382	K07466|1|0.0|993|vvi:100255412|replication factor A1	GO:0005634//nucleus	GO:0003677//DNA binding	GO:0010224//response to UV-B;GO:0010389//regulation of G2/M transition of mitotic cell cycle;GO:0009909//regulation of flower development;GO:0000724//double-strand break repair via homologous recombination;GO:0016444//somatic cell DNA recombination;GO:0051567//histone H3-K9 methylation;GO:0031047//gene silencing by RNA;GO:0009555//pollen development;GO:0006270//DNA replication initiation;GO:00082…	gi|460380621|ref|XP_004236053.1|/0/PREDICTED: replication protein A 70 kDa DNA-binding subunit-like [Solanum lycopersicum]
Solyc03g025190	84.1314	371.879	2.14412	5.75e-08	5.94e-06	K03327|1|0.0|739|rcu:RCOM_1582850|multidrug resistance protein, MATE family	GO:0005774//vacuolar membrane;GO:0005886//plasma membrane	GO:0015238//drug transmembrane transporter activity;GO:0015297//antiporter activity	GO:0006855//drug transmembrane transport;GO:0009812//flavonoid metabolic process;GO:0009555//pollen development;GO:0009901//anther dehiscence	gi|350534958|ref|NP_001234424.1|/0/uncharacterized protein LOC543899 [Solanum lycopersicum]
Solyc06g043150	14.403	63.4911	2.14018	0.000414244	0.0102756	K03364|1|0.0|676|zma:100193750|cell division cycle 20-like protein 1, cofactor of APC complex	GO:0009536//plastid;GO:0005834//heterotrimeric G-protein complex;GO:0005634//nucleus	GO:0004871//signal transducer activity;GO:0005515//protein binding	GO:0031047//gene silencing by RNA;GO:0051788//response to misfolded protein;GO:0042127//regulation of cell proliferation;GO:0043161//proteasomal ubiquitin-dependent protein catabolic process;GO:0000911//cytokinesis by cell plate formation;GO:0051567//histone H3-K9 methylation;GO:0051510//regulation of unidimensional cell growth;GO:0051225//spindle assembly;GO:0006342//chromatin silencing;GO:00063…	gi|283837095|emb|CBH19892.1|/0/cell cycle switch 52B [Solanum lycopersicum var. cerasiforme]
Solyc11g065760	36.3508	160.225	2.14004	4.57e-06	0.000250149	K00857|1|2e-90|330|vvi:100852993|thymidine kinase [EC:2.7.1.21]	GO:0005739//mitochondrion	GO:0046872//metal ion binding;GO:0004797//thymidine kinase activity;GO:0005524//ATP binding	GO:0006260//DNA replication;GO:0016310//phosphorylation	gi|350535573|ref|NP_001234713.1|/1.12505e-132/TK1-like deoxyribonucleoside kinase [Solanum lycopersicum]
Solyc01g079110	188.139	827.822	2.13752	4.31e-09	6.16e-07	K11253|1|1e-70|262|aly:ARALYDRAFT_471009|histone H3	GO:0000786//nucleosome;GO:0005634//nucleus;GO:0009536//plastid	GO:0003677//DNA binding;GO:0046982//protein heterodimerization activity	GO:0008283//cell proliferation;GO:0006334//nucleosome assembly	gi|460367008|ref|XP_004229367.1|/5.65486e-70/PREDICTED: histone H3.2-like [Solanum lycopersicum]
Solyc06g063180	198.077	870.269	2.1354	3.98e-09	5.77e-07	K05387|1|0.0|727|ath:AT2G29110|glutamate receptor, ionotropic, other eukaryote	-	GO:0005215//transporter activity	-	gi|460392519|ref|XP_004241863.1|/0/PREDICTED: glutamate receptor 2.8-like [Solanum lycopersicum]
Solyc04g076190	352.829	1544.5	2.1301	1.88e-09	2.92e-07	K00924|1|6e-27|120|ath:AT5G22850|[EC:2.7.1.-]	GO:0009505//plant-type cell wall;GO:0048046//apoplast	GO:0004190//aspartic-type endopeptidase activity	GO:0006508//proteolysis	gi|460384572|ref|XP_004237984.1|/0/PREDICTED: aspartic proteinase nepenthesin-1-like [Solanum lycopersicum]
Solyc08g006790	106.664	465.839	2.12676	3.37e-08	3.68e-06	-	GO:0031225//anchored to membrane;GO:0005886//plasma membrane	-	GO:0000911//cytokinesis by cell plate formation;GO:0051225//spindle assembly;GO:0010075//regulation of meristem growth;GO:0006084//acetyl-CoA metabolic process	gi|460397943|ref|XP_004244524.1|/2.60645e-96/PREDICTED: early nodulin-like protein 1-like [Solanum lycopersicum]
Solyc11g012130	367.034	1600.48	2.12452	1.28e-09	2.09e-07	-	-	-	-	gi|460409660|ref|XP_004250256.1|/1.38172e-94/PREDICTED: early nodulin-like protein 2-like [Solanum lycopersicum]
Solyc03g083560	221.356	964.65	2.12364	3.69e-09	5.46e-07	-	GO:0005576//extracellular region;GO:0009506//plasmodesma;GO:0009505//plant-type cell wall	-	GO:0080167//response to karrikin;GO:0007020//microtubule nucleation	gi|460378361|ref|XP_004234941.1|/0/PREDICTED: uncharacterized protein LOC101250380 [Solanum lycopersicum]
Solyc07g053700	14.3486	62.4996	2.12294	0.000651491	0.0145951	-	GO:0043231//intracellular membrane-bounded organelle	-	-	gi|460396511|ref|XP_004243816.1|/0/PREDICTED: reticulon-like protein B17-like [Solanum lycopersicum]
Solyc03g113710	17.0592	74.3027	2.12287	0.000274229	0.00736317	K01115|1|5e-12|71.6|vcn:VOLCADRAFT_99471|phospholipase D [EC:3.1.4.4]	-	-	-	gi|460381560|ref|XP_004236516.1|/0/PREDICTED: formin-like protein 7-like [Solanum lycopersicum]
Solyc11g065190	33.3254	144.746	2.11883	4.88e-06	0.000259624	K06688|1|1e-85|313|rcu:RCOM_1578930|ubiquitin-conjugating enzyme E2 C [EC:6.3.2.19]	GO:0005737//cytoplasm;GO:0005634//nucleus	GO:0004842//ubiquitin-protein ligase activity	GO:0043161//proteasomal ubiquitin-dependent protein catabolic process;GO:0000911//cytokinesis by cell plate formation;GO:0051510//regulation of unidimensional cell growth;GO:0043248//proteasome assembly;GO:0051788//response to misfolded protein;GO:0000226//microtubule cytoskeleton organization;GO:0016567//protein ubiquitination;GO:0042023//DNA endoreduplication;GO:0008283//cell proliferation	gi|460411017|ref|XP_004250911.1|/5.95008e-102/PREDICTED: ubiquitin-conjugating enzyme E2 19-like [Solanum lycopersicum]
Solyc04g014310	49.0541	212.943	2.11802	1.06e-06	7.2e-05	-	-	-	-	gi|460381938|ref|XP_004236698.1|/1.93981e-33/PREDICTED: uncharacterized protein LOC101245638 [Solanum lycopersicum]
Solyc01g008030	15.305	66.2993	2.11499	0.000539425	0.0126997	-	-	-	-	-
Solyc12g005720	22.6415	97.8194	2.11115	5e-05	0.0018185	-	GO:0044464//cell part	-	-	gi|460412234|ref|XP_004251507.1|/8.18232e-142/PREDICTED: cysteine-rich repeat secretory protein 38-like [Solanum lycopersicum]
Solyc03g083690	21.6827	93.1349	2.10278	0.000104363	0.00335791	-	-	-	-	-
Solyc09g006010	326.426	1401.21	2.10184	2.49e-09	3.74e-07	K13449|1|3e-38|154|vvi:100258414|pathogenesis-related protein 1	-	-	-	gi|460402446|ref|XP_004246723.1|/1.63364e-64/PREDICTED: pathogenesis-related leaf protein 4-like [Solanum lycopersicum]
Solyc06g074140	28.593	122.702	2.10142	1.98e-05	0.000836365	-	-	-	-	gi|460391451|ref|XP_004241334.1|/0/PREDICTED: E3 ubiquitin-protein ligase PUB24-like [Solanum lycopersicum]
Solyc05g052370	15.5701	66.7503	2.09999	0.000634876	0.014295	K00423|1|9e-39|159|ppp:PHYPADRAFT_163787|L-ascorbate oxidase [EC:1.10.3.3]	GO:0048046//apoplast	GO:0005507//copper ion binding;GO:0052716//hydroquinone:oxygen oxidoreductase activity;GO:0008447//L-ascorbate oxidase activity	GO:0046688//response to copper ion;GO:0046274//lignin catabolic process;GO:0055114//oxidation-reduction process	gi|460388608|ref|XP_004239959.1|/0/PREDICTED: laccase-12-like [Solanum lycopersicum]
Solyc02g068600	14.8268	63.4954	2.09845	0.000698866	0.0153771	-	-	-	-	gi|460376246|ref|XP_004233910.1|/0/PREDICTED: ankyrin repeat-containing protein At3g12360-like [Solanum lycopersicum]
Solyc12g014500	11.2142	47.948	2.09614	0.00174771	0.0308433	K08241|1|1e-49|195|aly:ARALYDRAFT_472188|jasmonate O-methyltransferase [EC:2.1.1.141]	-	GO:0051749//indole acetic acid carboxyl methyltransferase activity;GO:0042802//identical protein binding;GO:0030795//jasmonate O-methyltransferase activity;GO:0000287//magnesium ion binding	GO:0045492//xylan biosynthetic process;GO:0009944//polarity specification of adaxial/abaxial axis;GO:0032259//methylation;GO:0010413//glucuronoxylan metabolic process;GO:0010252//auxin homeostasis	gi|460413073|ref|XP_004251920.1|/0/PREDICTED: indole-3-acetate O-methyltransferase 1-like [Solanum lycopersicum]
Solyc08g078640	11.2142	47.9267	2.0955	0.00174986	0.0308567	K01051|1|2e-87|320|smo:SELMODRAFT_76951|pectinesterase [EC:3.1.1.11]	GO:0009505//plant-type cell wall;GO:0005576//extracellular region	GO:0030599//pectinesterase activity;GO:0045330	GO:0016572//histone phosphorylation;GO:0042545//cell wall modification	gi|460400489|ref|XP_004245767.1|/0/PREDICTED: probable pectinesterase 68-like [Solanum lycopersicum]
Solyc01g088620	12.914	54.9941	2.09035	0.0012476	0.0239188	-	-	-	-	gi|460367705|ref|XP_004229711.1|/7.65456e-134/PREDICTED: uncharacterized protein LOC101247064 [Solanum lycopersicum]
Solyc01g007040	183.092	777.275	2.08586	9.88e-09	1.24e-06	-	GO:0005829//cytosol;GO:0000151//ubiquitin ligase complex	GO:0004842//ubiquitin-protein ligase activity	GO:0009414//response to water deprivation;GO:0051865//protein autoubiquitination;GO:0010200//response to chitin;GO:0002679//respiratory burst involved in defense response;GO:0015824//proline transport	gi|460365615|ref|XP_004228696.1|/2.4342e-84/PREDICTED: E3 ubiquitin-protein ligase PUB23-like [Solanum lycopersicum]
Solyc07g056600	10.6295	45.1057	2.08524	0.00240067	0.0389129	-	-	-	GO:0006979//response to oxidative stress;GO:0051707//response to other organism;GO:0009725//response to hormone stimulus;GO:0071310//cellular response to organic substance;GO:1901701;GO:0007165//signal transduction;GO:0045088//regulation of innate immune response;GO:0044237//cellular metabolic process	gi|460396419|ref|XP_004243771.1|/2.14729e-56/PREDICTED: uncharacterized protein LOC101248796 [Solanum lycopersicum]
Solyc07g066540	17.4333	73.7878	2.08154	0.000225448	0.00628	-	GO:0016020//membrane;GO:0009506//plasmodesma;GO:0005739//mitochondrion	-	-	gi|460396838|ref|XP_004243977.1|/8.21445e-109/PREDICTED: uncharacterized protein LOC101256607 [Solanum lycopersicum]
Solyc02g014030	256.378	1084.66	2.0809	5.68e-09	7.78e-07	K04733|1|1e-149|529|ath:AT5G38990|interleukin-1 receptor-associated kinase 4 [EC:2.7.11.1];K13430|5|1e-67|256|aly:ARALYDRAFT_909268|serine/threonine-protein kinase PBS1 [EC:2.7.11.1]	-	GO:0016301//kinase activity	-	gi|460371367|ref|XP_004231511.1|/0/PREDICTED: receptor-like protein kinase FERONIA-like [Solanum lycopersicum]
Solyc06g065010	15.7311	66.3164	2.07574	0.000528355	0.0124952	K01206|1|7e-23|106|ath:AT1G67830|alpha-L-fucosidase [EC:3.2.1.51];K00514|3|3e-22|104|rcu:RCOM_1428040|zeta-carotene desaturase [EC:1.3.5.6]	-	GO:0016788//hydrolase activity, acting on ester bonds	GO:0006952//defense response;GO:0051707//response to other organism;GO:0009725//response to hormone stimulus	gi|460392485|ref|XP_004241846.1|/0/PREDICTED: GDSL esterase/lipase 1-like [Solanum lycopersicum]
Solyc08g077990	10.736	45.1527	2.07235	0.00237916	0.0387242	K02214|1|0.0|703|vvi:100261519|cell division control protein 7 [EC:2.7.11.1]	GO:0005634//nucleus	GO:0004674//protein serine/threonine kinase activity	GO:0046777//protein autophosphorylation;GO:0045727//positive regulation of translation	gi|460401304|ref|XP_004246166.1|/0/PREDICTED: uncharacterized protein LOC101255123 [Solanum lycopersicum]
Solyc10g050110	199.455	838.345	2.07148	1.35e-08	1.61e-06	K13420|1|3e-25|114|vvi:100253808|LRR receptor-like serine/threonine-protein kinase FLS2 [EC:2.7.11.1]	GO:0009507//chloroplast	-	GO:0009987//cellular process	gi|460406616|ref|XP_004248758.1|/0/PREDICTED: uncharacterized protein At4g06744-like [Solanum lycopersicum]
Solyc12g007210	16.7941	70.5201	2.07008	0.000406294	0.0101123	K04392|1|2e-105|379|vvi:100266265|Ras-related C3 botulinum toxin substrate 1	GO:0005622//intracellular;GO:0005576//extracellular region;GO:0005886//plasma membrane	GO:0004767//sphingomyelin phosphodiesterase activity;GO:0003924//GTPase activity;GO:0005525//GTP binding	GO:0007015//actin filament organization;GO:0007264//small GTPase mediated signal transduction;GO:0006184//GTP catabolic process;GO:0015031//protein transport	gi|460412459|ref|XP_004251616.1|/3.0942e-112/PREDICTED: rac-like GTP-binding protein ARAC7-like [Solanum lycopersicum]
Solyc09g059170	46.5045	195.06	2.06847	2.16e-06	0.000132003	K08237|1|6e-30|129|ath:AT1G01420|hydroquinone glucosyltransferase [EC:2.4.1.218]	-	GO:0016758//transferase activity, transferring hexosyl groups	GO:0008152//metabolic process	gi|460403139|ref|XP_004247056.1|/1.74877e-139/PREDICTED: anthocyanidin 3-O-glucosyltransferase-like isoform 1 [Solanum lycopersicum]
Solyc03g119590	39.1704	164.029	2.06611	4.97e-06	0.000263918	-	-	-	-	gi|460380170|ref|XP_004235831.1|/2.97578e-58/PREDICTED: uncharacterized protein LOC101261799 [Solanum lycopersicum]
Solyc02g064980	131.535	549.716	2.06324	4.7e-08	4.92e-06	K13414|1|4e-36|150|ath:AT4G08500|mitogen-activated protein kinase kinase kinase 1, plant [EC:2.7.11.25]	-	GO:0016301//kinase activity	GO:0009628//response to abiotic stimulus;GO:0009737//response to abscisic acid stimulus;GO:0006950//response to stress;GO:0035556//intracellular signal transduction	gi|460375291|ref|XP_004233440.1|/0/PREDICTED: MAP kinase kinase kinase mkh1-like isoform 1 [Solanum lycopersicum]
Solyc01g110940	10.3643	43.2251	2.06024	0.00267599	0.0423145	K14488|1|1e-30|129|pop:POPTR_649290|SAUR family protein	GO:0005886//plasma membrane	-	GO:0010200//response to chitin;GO:0009409//response to cold	gi|460370299|ref|XP_004230991.1|/1.31262e-42/PREDICTED: auxin-induced protein 15A-like [Solanum lycopersicum]
Solyc12g017480	35.8726	149.482	2.05901	1.26e-05	0.000574603	K13420|1|3e-16|84.3|vvi:100253808|LRR receptor-like serine/threonine-protein kinase FLS2 [EC:2.7.11.1]	-	GO:0016787//hydrolase activity	GO:0042023//DNA endoreduplication	gi|460413169|ref|XP_004251967.1|/0/PREDICTED: protein lap1-like [Solanum lycopersicum]
Solyc08g080640	1766.58	7352.14	2.05721	1.4e-09	2.26e-07	-	-	-	-	gi|6093527|sp|P12670.2|NP24_SOLLC/2.5645e-154/RecName: Full=Protein NP24; AltName: Full=Pathogenesis-related protein PR P23; AltName: Full=Salt-induced protein; Flags: Precursor
Solyc04g014320	365.592	1519.95	2.05572	4.99e-09	7.06e-07	K01115|1|1e-08|55.8|vcn:VOLCADRAFT_99471|phospholipase D [EC:3.1.4.4]	-	-	-	gi|460381938|ref|XP_004236698.1|/1.88582e-49/PREDICTED: uncharacterized protein LOC101245638 [Solanum lycopersicum]
Solyc01g007030	180.163	748.745	2.05517	2.21e-08	2.56e-06	-	GO:0000151//ubiquitin ligase complex	GO:0004842//ubiquitin-protein ligase activity	GO:0016567//protein ubiquitination	gi|460365604|ref|XP_004228691.1|/3.91418e-107/PREDICTED: E3 ubiquitin-protein ligase PUB22-like [Solanum lycopersicum]
Solyc04g077510	126.273	524.744	2.05507	6.58e-08	6.7e-06	-	-	-	-	gi|460384744|ref|XP_004238069.1|/0/PREDICTED: growth-regulating factor 1-like [Solanum lycopersicum]
Solyc12g039070	144.028	598.489	2.05498	3.28e-08	3.64e-06	K01757|1|6e-62|236|ath:AT1G74000|strictosidine synthase [EC:4.3.3.2]	-	-	-	gi|460413789|ref|XP_004252261.1|/0/PREDICTED: strictosidine synthase 3-like [Solanum lycopersicum]
Solyc10g080010	139.189	578.163	2.05443	4.3e-08	4.54e-06	-	GO:0005576//extracellular region	GO:0016757//transferase activity, transferring glycosyl groups	GO:0010200//response to chitin	gi|460407630|ref|XP_004249254.1|/0/PREDICTED: uncharacterized protein LOC101252830 [Solanum lycopersicum]
Solyc03g121340	85.9377	356.311	2.05177	2.2e-07	1.87e-05	-	-	-	-	gi|255549672|ref|XP_002515887.1|/1.55639e-19/conserved hypothetical protein [Ricinus communis]
Solyc10g011910	550.374	2279.61	2.0503	3.77e-09	5.54e-07	K13425|1|3e-77|286|vvi:100256849|WRKY transcription factor 22	-	-	GO:0010200//response to chitin;GO:0010150//leaf senescence;GO:0050794//regulation of cellular process;GO:0008152//metabolic process	gi|460405198|ref|XP_004248063.1|/0/PREDICTED: WRKY transcription factor 22-like [Solanum lycopersicum]
Solyc12g011150	38.8484	160.825	2.04957	1.01e-05	0.000474904	-	-	-	-	gi|460413441|ref|XP_004252097.1|/2.38452e-44/PREDICTED: uncharacterized protein LOC101254173 [Solanum lycopersicum]
Solyc09g082300	45.3326	187.227	2.04617	4.7e-06	0.000254146	K03006|1|1e-07|55.1|mtr:MTR_5g023020|DNA-directed RNA polymerase II subunit RPB1 [EC:2.7.7.6];K14709|4|9e-07|52.0|vcn:VOLCADRAFT_104214|solute carrier family 39 (zinc transporter), member 1/2/3	-	-	-	gi|225432724|ref|XP_002278974.1|/4.60738e-49/PREDICTED: uncharacterized protein LOC100257872 [Vitis vinifera]
Solyc03g113910	109.107	450.3	2.04514	1.22e-07	1.12e-05	-	-	-	-	gi|460380802|ref|XP_004236143.1|/1.16745e-83/PREDICTED: gibberellin-regulated protein 10-like [Solanum lycopersicum]
Solyc00g156980	23.1718	94.5133	2.02815	0.000126729	0.00395711	K15403|1|4e-47|184|gmx:100784433|fatty acid omega-hydroxy dehydrogenase [EC:1.1.-.-]	-	GO:0050660//flavin adenine dinucleotide binding;GO:0008812//choline dehydrogenase activity	GO:0006066//alcohol metabolic process;GO:0009553//embryo sac development;GO:0007267//cell-cell signaling;GO:0010430//fatty acid omega-oxidation	gi|460416278|ref|XP_004253473.1|/7.80103e-88/PREDICTED: protein HOTHEAD-like [Solanum lycopersicum]
Solyc03g120230	22.2674	90.7606	2.02713	0.000181518	0.00531647	K09291|1|5e-22|104|rcu:RCOM_1128370|nucleoprotein TPR;K10400|4|1e-21|103|vvi:100255624|kinesin family member 15	GO:0042646//plastid nucleoid;GO:0016363//nuclear matrix;GO:0009535//chloroplast thylakoid membrane	GO:0005515//protein binding;GO:0003677//DNA binding	GO:0006098//pentose-phosphate shunt;GO:0019760//glucosinolate metabolic process;GO:0006655//phosphatidylglycerol biosynthetic process;GO:0019252//starch biosynthetic process;GO:0009664//plant-type cell wall organization;GO:0019288//isopentenyl diphosphate biosynthetic process, mevalonate-independent pathway;GO:0010075//regulation of meristem growth;GO:0009902//chloroplast relocation;GO:0000023//m…	gi|350537767|ref|NP_001234309.1|/0/MAR-binding filament-like protein 1 [Solanum lycopersicum]
Solyc10g078470	10.736	43.7315	2.02622	0.00318618	0.0481116	K03834|1|4e-38|157|gmx:100793479|tyrosine-specific transport protein	GO:0016020//membrane	GO:0005302//L-tyrosine transmembrane transporter activity	GO:0001708//cell fate specification;GO:0006863//purine nucleobase transport;GO:0006865//amino acid transport	gi|460407393|ref|XP_004249137.1|/0/PREDICTED: tyrosine-specific transport protein-like [Solanum lycopersicum]
Solyc10g083510	22.8521	93.0751	2.02607	0.000157446	0.00471086	-	GO:0005829//cytosol;GO:0005618//cell wall;GO:0005739//mitochondrion;GO:0009506//plasmodesma;GO:0009507//chloroplast;GO:0005773//vacuole;GO:0005794//Golgi apparatus;GO:0005886//plasma membrane	GO:0005524//ATP binding;GO:0005515//protein binding	GO:0048364//root development;GO:0048366//leaf development;GO:0044237//cellular metabolic process;GO:0061062//regulation of nematode larval development;GO:0009624//response to nematode	gi|460408034|ref|XP_004249453.1|/0/PREDICTED: growth-regulating factor 2-like [Solanum lycopersicum]
Solyc11g073260	193.714	788.167	2.02457	3.24e-08	3.61e-06	K11251|1|9e-68|253|gmx:100784431|histone H2A	GO:0000786//nucleosome;GO:0005634//nucleus	GO:0003677//DNA binding;GO:0046982//protein heterodimerization activity	GO:0006334//nucleosome assembly	gi|460411858|ref|XP_004251321.1|/1.72245e-74/PREDICTED: histone H2A-like [Solanum lycopersicum]
Solyc02g087880	189.041	768.896	2.02409	2.86e-08	3.22e-06	K07374|1|0.0|892|rcu:RCOM_0855220|tubulin alpha	GO:0005874//microtubule;GO:0005737//cytoplasm	GO:0003924//GTPase activity;GO:0005200//structural constituent of cytoskeleton;GO:0005525//GTP binding	GO:0051258//protein polymerization;GO:0006184//GTP catabolic process;GO:0007017//microtubule-based process	gi|460372829|ref|XP_004232226.1|/0/PREDICTED: tubulin alpha chain-like [Solanum lycopersicum]
Solyc04g074450	1981.55	8058.29	2.02384	2.36e-09	3.59e-07	-	GO:0009505//plant-type cell wall	-	GO:0009741//response to brassinosteroid stimulus	gi|460384468|ref|XP_004237933.1|/0/PREDICTED: uncharacterized protein LOC101261020 isoform 2 [Solanum lycopersicum]
Solyc03g083680	350.022	1422.9	2.02331	8.69e-09	1.1e-06	-	-	-	-	-
Solyc06g066590	18.2832	74.2643	2.02215	0.000335204	0.00859337	-	GO:0005886//plasma membrane	-	GO:0009684//indoleacetic acid biosynthetic process;GO:0006979//response to oxidative stress;GO:0015706//nitrate transport;GO:0009611//response to wounding;GO:0006569//tryptophan catabolic process;GO:0010167//response to nitrate;GO:0030003//cellular cation homeostasis;GO:0070838//divalent metal ion transport;GO:0006865//amino acid transport	gi|460392270|ref|XP_004241740.1|/4.10436e-106/PREDICTED: protein PLANT CADMIUM RESISTANCE 8-like [Solanum lycopersicum]
Solyc12g013700	181.707	737.666	2.02135	3.3e-08	3.64e-06	-	GO:0009506//plasmodesma;GO:0005886//plasma membrane;GO:0005634//nucleus;GO:0005829//cytosol	GO:0005515//protein binding	GO:0009862//systemic acquired resistance, salicylic acid mediated signaling pathway;GO:0010310//regulation of hydrogen peroxide metabolic process;GO:0001666//response to hypoxia	gi|460412934|ref|XP_004251851.1|/4.47231e-149/PREDICTED: stem-specific protein TSJT1-like [Solanum lycopersicum]
Solyc09g013150	34.7576	141.036	2.02066	1.94e-05	0.000823453	K08193|1|4e-112|403|olu:OSTLU_2927|MFS transporter, ACS family, solute carrier family 17 (sodium-dependent inorganic phosphate cotransporter), other;K12303|3|2e-77|288|cre:CHLREDRAFT_78631|MFS transporter, ACS family, solute carrier family 17 (sodium-dependent inorganic phosphate cotransporter), member 9	GO:0031969//chloroplast membrane;GO:0016021//integral to membrane	GO:0005315//inorganic phosphate transmembrane transporter activity	GO:0055085//transmembrane transport;GO:0006811//ion transport	gi|460401674|ref|XP_004246342.1|/0/PREDICTED: probable anion transporter 3, chloroplastic-like [Solanum lycopersicum]
Solyc03g120110	34.5446	140.151	2.02045	2.17e-05	0.000908672	K13430|1|5e-57|221|zma:100283091|serine/threonine-protein kinase PBS1 [EC:2.7.11.1];K04733|4|2e-56|219|smo:SELMODRAFT_33807|interleukin-1 receptor-associated kinase 4 [EC:2.7.11.1]	-	GO:0005488//binding;GO:0016301//kinase activity	-	gi|460381341|ref|XP_004236409.1|/0/PREDICTED: G-type lectin S-receptor-like serine/threonine-protein kinase CES101-like [Solanum lycopersicum]
Solyc09g008380	44.2176	179.121	2.01824	6.4e-06	0.00032249	K01728|1|0.0|684|rcu:RCOM_1353560|pectate lyase [EC:4.2.2.2]	GO:0005886//plasma membrane;GO:0031225//anchored to membrane	GO:0030570//pectate lyase activity	GO:0042547//cell wall modification involved in multidimensional cell growth;GO:0009814//defense response, incompatible interaction	gi|460402218|ref|XP_004246611.1|/0/PREDICTED: probable pectate lyase 12-like [Solanum lycopersicum]
Solyc10g008910	720.438	2909.31	2.01373	5.54e-09	7.63e-07	K11253|1|5e-71|263|aly:ARALYDRAFT_471009|histone H3	GO:0000786//nucleosome;GO:0005634//nucleus;GO:0009536//plastid	GO:0003677//DNA binding;GO:0046982//protein heterodimerization activity	GO:0008283//cell proliferation;GO:0006334//nucleosome assembly	gi|470105592|ref|XP_004289166.1|/5.65486e-70/PREDICTED: histone H3.2-like [Fragaria vesca subsp. vesca]
Solyc02g038690	54.9536	221.491	2.01096	2.46e-06	0.000146854	K11252|1|7e-59|223|pop:POPTR_553020|histone H2B	GO:0000786//nucleosome;GO:0005730//nucleolus;GO:0009507//chloroplast	GO:0003677//DNA binding;GO:0046982//protein heterodimerization activity	GO:0006334//nucleosome assembly	gi|460371624|ref|XP_004231635.1|/2.39362e-68/PREDICTED: probable histone H2B.1-like [Solanum lycopersicum]
Solyc08g079800	31.6233	127.399	2.0103	2.79e-05	0.00110885	-	-	-	GO:0006351//transcription, DNA-dependent	gi|460401241|ref|XP_004246135.1|/1.91443e-128/PREDICTED: growth-regulating factor 12-like [Solanum lycopersicum]
Solyc06g030470	91.0914	366.846	2.00979	3.7e-07	2.91e-05	-	GO:0005886//plasma membrane	-	-	gi|460390306|ref|XP_004240776.1|/0/PREDICTED: uncharacterized protein LOC101255003 [Solanum lycopersicum]
Solyc08g007820	526.045	2115.6	2.00781	6.37e-09	8.53e-07	K09286|1|3e-41|166|ath:AT4G25470|EREBP-like factor	-	-	GO:0009987//cellular process	gi|460398095|ref|XP_004244599.1|/7.79049e-79/PREDICTED: dehydration-responsive element-binding protein 1F-like [Solanum lycopersicum]
Solyc04g005660	15.6791	62.9847	2.00616	0.000731189	0.0159305	-	GO:0005634//nucleus	GO:0046983//protein dimerization activity	GO:0009416//response to light stimulus	gi|460382621|ref|XP_004237036.1|/4.09974e-44/PREDICTED: transcription factor bHLH135-like [Solanum lycopersicum]
Solyc04g014330	289.533	1163.06	2.00612	2.04e-08	2.39e-06	K01115|1|1e-08|55.8|vcn:VOLCADRAFT_99471|phospholipase D [EC:3.1.4.4]	-	-	-	gi|460381938|ref|XP_004236698.1|/2.01483e-51/PREDICTED: uncharacterized protein LOC101245638 [Solanum lycopersicum]
Solyc09g084440	35.9792	144.385	2.00468	2.24e-05	0.00093074	-	GO:0005576//extracellular region	GO:0004867//serine-type endopeptidase inhibitor activity	GO:0009611//response to wounding;GO:0010466//negative regulation of peptidase activity	gi|460404375|ref|XP_004247658.1|/1.63286e-56/PREDICTED: wound-induced proteinase inhibitor 1-like [Solanum lycopersicum]
Solyc06g005130	17.9636	71.9541	2.002	0.000500305	0.0119559	-	-	-	-	gi|460389941|ref|XP_004240603.1|/0/PREDICTED: dof zinc finger protein DOF2.1-like [Solanum lycopersicum]
Solyc04g078590	23.5955	94.5048	2.00188	0.000192613	0.00555352	K10576|1|2e-75|281|vvi:100250088|ubiquitin-conjugating enzyme E2 H [EC:6.3.2.19];K13415|2|6e-57|220|rcu:RCOM_0478150|protein brassinosteroid insensitive 1 [EC:2.7.10.1 2.7.11.1]	GO:0005886//plasma membrane	GO:0005524//ATP binding;GO:0004674//protein serine/threonine kinase activity	GO:0000911//cytokinesis by cell plate formation;GO:0006468//protein phosphorylation;GO:0007169//transmembrane receptor protein tyrosine kinase signaling pathway	gi|460384873|ref|XP_004238131.1|/0/PREDICTED: probable inactive receptor kinase At5g67200-like [Solanum lycopersicum]
Solyc02g068660	40.8702	163.574	2.00082	1.02e-05	0.000476785	K04733|1|3e-55|214|smo:SELMODRAFT_159261|interleukin-1 receptor-associated kinase 4 [EC:2.7.11.1];K00924|3|4e-54|211|ath:AT3G59420|[EC:2.7.1.-]	GO:0044464//cell part	GO:0005488//binding;GO:0004672//protein kinase activity	GO:0010038//response to metal ion;GO:0016310//phosphorylation	gi|460376240|ref|XP_004233907.1|/0/PREDICTED: wall-associated receptor kinase-like 1-like [Solanum lycopersicum]
Solyc02g088240	13.9769	55.9259	2.00047	0.00168593	0.0298956	-	GO:0016021//integral to membrane	-	-	gi|460372783|ref|XP_004232204.1|/0/PREDICTED: phosphate transporter PHO1 homolog 3-like [Solanum lycopersicum]
Solyc03g093080	150.354	597.825	1.99136	7.18e-08	7.25e-06	K08235|1|9e-137|484|vvi:100241119|xyloglucan:xyloglucosyl transferase [EC:2.4.1.207];K14504|2|8e-136|481|vvi:100256520|xyloglucan:xyloglucosyl transferase TCH4 [EC:2.4.1.207]	GO:0048046//apoplast;GO:0005618//cell wall	GO:0004553//hydrolase activity, hydrolyzing O-glycosyl compounds;GO:0016762//xyloglucan:xyloglucosyl transferase activity	GO:0006073//cellular glucan metabolic process	gi|460378800|ref|XP_004235156.1|/1.25745e-169/PREDICTED: probable xyloglucan endotransglucosylase/hydrolase protein 23-like [Solanum lycopersicum]
Solyc08g067510	214.658	853.398	1.99118	3.5e-08	3.79e-06	-	-	-	-	gi|460399382|ref|XP_004245220.1|/9.50939e-65/PREDICTED: non-specific lipid-transfer protein 3-like [Solanum lycopersicum]
Solyc12g041960	16.7941	66.7247	1.99027	0.00077099	0.0166021	K16040|1|1e-111|400|vvi:100233030|trans-resveratrol di-O-methyltransferase [EC:2.1.1.240];K13230|2|5e-64|243|zma:100147731|2,4,7-trihydroxy-1,4-benzoxazin-3-one-glucoside 7-O-methyltransferase [EC:2.1.1.241];K05279|3|7e-43|172|sbi:SORBI_07g003860|flavonol 3-O-methyltransferase [EC:2.1.1.76]	-	GO:0008171//O-methyltransferase activity	-	gi|460414215|ref|XP_004252468.1|/0/PREDICTED: trans-resveratrol di-O-methyltransferase-like [Solanum lycopersicum]
Solyc09g074300	118.413	470.298	1.98974	1.39e-07	1.26e-05	K11251|1|5e-59|224|rcu:RCOM_1429760|histone H2A	GO:0000786//nucleosome;GO:0005730//nucleolus	GO:0003677//DNA binding;GO:0046982//protein heterodimerization activity	GO:0006334//nucleosome assembly	gi|460404012|ref|XP_004247479.1|/3.23605e-73/PREDICTED: histone H2AX-like [Solanum lycopersicum]
Solyc10g084020	119.687	472.898	1.98226	1.74e-07	1.5e-05	K14488|1|3e-22|101|pop:POPTR_576714|SAUR family protein	-	-	-	gi|460408731|ref|XP_004249795.1|/3.98946e-71/PREDICTED: auxin-induced protein X15-like [Solanum lycopersicum]
Solyc08g068610	160.976	635.311	1.98062	1.05e-07	1.01e-05	K01590|1|4e-157|552|rcu:RCOM_1170790|histidine decarboxylase [EC:4.1.1.22]	-	GO:0030170//pyridoxal phosphate binding;GO:0004398//histidine decarboxylase activity	GO:0019752//carboxylic acid metabolic process	gi|350538887|ref|NP_001233852.1|/0/aromatic amino acid decarboxylase 1B [Solanum lycopersicum]
Solyc10g076410	259.939	1025.49	1.98006	2.86e-08	3.22e-06	K14496|1|2e-79|292|rcu:RCOM_0847730|abscisic acid receptor PYR/PYL family	-	-	GO:0009738//abscisic acid mediated signaling pathway	gi|460407246|ref|XP_004249065.1|/1.44907e-116/PREDICTED: abscisic acid receptor PYL4-like [Solanum lycopersicum]
Solyc06g053760	28.9671	114.277	1.98005	4.75e-05	0.00174387	K08486|1|1e-115|414|aly:ARALYDRAFT_470918|syntaxin 1B/2/3	GO:0009504//cell plate;GO:0009506//plasmodesma;GO:0012505//endomembrane system;GO:0009524//phragmoplast;GO:0005886//plasma membrane	GO:0005484//SNAP receptor activity	GO:0000911//cytokinesis by cell plate formation;GO:0016192//vesicle-mediated transport;GO:0051225//spindle assembly;GO:0006084//acetyl-CoA metabolic process;GO:0006944//cellular membrane fusion;GO:0010583//response to cyclopentenone;GO:0006886//intracellular protein transport;GO:0008283//cell proliferation;GO:0016126//sterol biosynthetic process	gi|460390815|ref|XP_004241020.1|/1.29847e-170/PREDICTED: syntaxin-related protein KNOLLE-like [Solanum lycopersicum]
Solyc01g086640	108.584	428.333	1.97992	1.72e-07	1.49e-05	-	GO:0005794//Golgi apparatus;GO:0009507//chloroplast	GO:0016757//transferase activity, transferring glycosyl groups	GO:0048765//root hair cell differentiation	gi|460367463|ref|XP_004229593.1|/0/PREDICTED: uncharacterized protein At1g04910-like [Solanum lycopersicum]
Solyc02g062890	156.461	617.193	1.97992	9.75e-08	9.53e-06	K08150|1|6e-69|259|vvi:100268023|MFS transporter, SP family, solute carrier family 2 (myo-inositol transporter), member 13	GO:0016021//integral to membrane;GO:0005886//plasma membrane	GO:0032440//2-alkenal reductase [NAD(P)] activity;GO:0005351//sugar:hydrogen symporter activity	GO:0055085//transmembrane transport;GO:0009684//indoleacetic acid biosynthetic process;GO:0055114//oxidation-reduction process;GO:0006857//oligopeptide transport;GO:0006569//tryptophan catabolic process;GO:0008643//carbohydrate transport	gi|460375438|ref|XP_004233513.1|/0/PREDICTED: probable polyol transporter 6-like [Solanum lycopersicum]
Solyc07g040710	116.81	459.887	1.97711	3.21e-07	2.57e-05	-	-	-	GO:0010200//response to chitin;GO:0010197//polar nucleus fusion;GO:0006829//zinc ion transport	gi|460396371|ref|XP_004243749.1|/0/PREDICTED: uncharacterized protein LOC101265748 [Solanum lycopersicum]
Solyc01g080750	57.7187	227.078	1.97608	2.61e-06	0.000154305	K11592|1|5e-41|166|smo:SELMODRAFT_448444|endoribonuclease Dicer [EC:3.1.26.-]	GO:0005737//cytoplasm	-	GO:0010583//response to cyclopentenone;GO:0000911//cytokinesis by cell plate formation;GO:0051225//spindle assembly	gi|460367266|ref|XP_004229496.1|/1.08322e-163/PREDICTED: uncharacterized protein LOC101248135 [Solanum lycopersicum]
Solyc03g005210	74.7779	293.922	1.97475	1.02e-06	6.98e-05	K12418|1|3e-07|53.9|cre:CHLREDRAFT_32523|fatty acid desaturase (delta-4 desaturase) [EC:1.14.19.-]	GO:0009941//chloroplast envelope	-	GO:0044765	gi|460376458|ref|XP_004234015.1|/8.44836e-118/PREDICTED: non-specific lipid-transfer protein-like protein At5g64080-like [Solanum lycopersicum]
Solyc01g097280	164.596	645.621	1.97176	8.28e-08	8.28e-06	K01183|1|2e-17|87.0|ath:AT3G12500|chitinase [EC:3.2.1.14]	-	GO:0008061//chitin binding	GO:0050832//defense response to fungus;GO:0042742//defense response to bacterium;GO:0009814//defense response, incompatible interaction	gi|460368476|ref|XP_004230092.1|/4.14808e-121/PREDICTED: wound-induced protein WIN1-like [Solanum lycopersicum]
Solyc12g057150	720.173	2824.6	1.97163	1.11e-08	1.35e-06	K10839|1|2e-11|65.5|cre:CHLREDRAFT_80907|UV excision repair protein RAD23;K01051|2|2e-09|58.9|gmx:100776781|pectinesterase [EC:3.1.1.11];K12447|5|1e-08|55.8|cre:CHLREDRAFT_32796|UDP-sugar pyrophosphorylase [EC:2.7.7.64]	GO:0016020//membrane	-	GO:0050896//response to stimulus	gi|460414332|ref|XP_004252526.1|/1.90889e-57/PREDICTED: uncharacterized protein LOC101246324 [Solanum lycopersicum]
Solyc08g069040	23.7565	93.0538	1.96974	0.000189641	0.00548496	K00430|1|2e-116|417|pop:POPTR_737716|peroxidase [EC:1.11.1.7]	-	GO:0020037//heme binding;GO:0046872//metal ion binding;GO:0004601//peroxidase activity	GO:0055114//oxidation-reduction process;GO:0006979//response to oxidative stress	gi|460399552|ref|XP_004245302.1|/0/PREDICTED: peroxidase 51-like [Solanum lycopersicum]
Solyc04g050010	18.5483	72.4264	1.96523	0.000573747	0.0132547	K01955|1|5e-56|214|vvi:100262205|carbamoyl-phosphate synthase large subunit [EC:6.3.5.5];K13944|2|2e-24|109|pop:POPTR_559669|LOB domain-containing protein 16	-	-	-	gi|460383917|ref|XP_004237662.1|/9.50313e-95/PREDICTED: LOB domain-containing protein 1-like [Solanum lycopersicum]
Solyc07g049440	354.965	1384.51	1.96362	2.2e-08	2.56e-06	K00514|1|2e-27|121|rcu:RCOM_1428040|zeta-carotene desaturase [EC:1.3.5.6];K01206|2|2e-25|115|ath:AT1G67830|alpha-L-fucosidase [EC:3.2.1.51]	-	GO:0016788//hydrolase activity, acting on ester bonds	GO:0006629//lipid metabolic process	gi|460395883|ref|XP_004243509.1|/0/PREDICTED: GDSL esterase/lipase At2g04570-like [Solanum lycopersicum]
Solyc06g059930	56.8144	221.011	1.95979	3.8e-06	0.000212231	K14181|1|3e-159|560|vvi:100256880|valencene synthase [EC:4.2.3.73];K12929|2|2e-123|441|rcu:RCOM_1574190|casbene synthase [EC:4.2.3.8];K14184|5|5e-105|380|aly:ARALYDRAFT_348000|alpha-humulene/beta-caryophyllene synthase [EC:4.2.3.- 4.2.3.57]	GO:0005737//cytoplasm	GO:0000287//magnesium ion binding;GO:0010333//terpene synthase activity	GO:0016114//terpenoid biosynthetic process	gi|350536595|ref|NP_001234766.1|/0/caryophyllene/alpha-humulene synthase [Solanum lycopersicum]
Solyc10g083170	67.761	263.428	1.95888	2.19e-06	0.000133093	K13070|1|1e-73|274|osa:4335093|momilactone-A synthase [EC:1.1.1.295];K09841|2|4e-71|266|bdi:100827045|xanthoxin dehydrogenase [EC:1.1.1.288]	-	GO:0055041;GO:0000166//nucleotide binding	GO:0055114//oxidation-reduction process	gi|460408703|ref|XP_004249781.1|/1.5313e-159/PREDICTED: zerumbone synthase-like [Solanum lycopersicum]
Solyc12g005020	43.5808	168.799	1.95354	1.3e-05	0.000587835	K15692|1|6e-13|72.4|bdi:100845565|E3 ubiquitin-protein ligase RNF13 [EC:6.3.2.19];K14297|2|8e-13|72.0|mtr:MTR_1g066430|nuclear pore complex protein Nup98-Nup96;K05283|3|1e-11|67.8|aly:ARALYDRAFT_354960|phosphatidylinositol glycan, class W [EC:2.3.-.-]	-	-	-	gi|460412141|ref|XP_004251461.1|/1.88235e-126/PREDICTED: NEP1-interacting protein-like 1-like [Solanum lycopersicum]
Solyc04g074410	2784.29	10757.1	1.9499	7.02e-09	9.28e-07	-	GO:0009505//plant-type cell wall	-	GO:0009741//response to brassinosteroid stimulus	gi|460384463|ref|XP_004237931.1|/0/PREDICTED: uncharacterized protein LOC101260427 [Solanum lycopersicum]
Solyc03g119910	24.4478	94.4109	1.94925	0.000187733	0.00544817	K04124|1|3e-137|486|pop:POPTR_548646|gibberellin 3-beta-dioxygenase [EC:1.14.11.15]	-	GO:0005506//iron ion binding;GO:0016707//gibberellin 3-beta-dioxygenase activity;GO:0008134//transcription factor binding	GO:0009739//response to gibberellin stimulus;GO:0009686//gibberellin biosynthetic process;GO:0010114//response to red light;GO:0009845//seed germination;GO:0055114//oxidation-reduction process	gi|350538953|ref|NP_001233855.1|/0/3b-hydroxylase [Solanum lycopersicum]
Solyc11g006980	16.6875	64.4101	1.94852	0.00115114	0.0224377	-	GO:0048046//apoplast	GO:0004784//superoxide dismutase activity;GO:0045735//nutrient reservoir activity;GO:0030145//manganese ion binding	GO:0055114//oxidation-reduction process	gi|460409076|ref|XP_004249966.1|/1.00374e-118/PREDICTED: germin-like protein subfamily 3 member 2-like [Solanum lycopersicum]
Solyc03g093110	183.726	708.4	1.94701	1.02e-07	9.79e-06	K14504|1|2e-134|476|vvi:100256520|xyloglucan:xyloglucosyl transferase TCH4 [EC:2.4.1.207];K08235|2|4e-134|475|vvi:100252949|xyloglucan:xyloglucosyl transferase [EC:2.4.1.207]	GO:0048046//apoplast;GO:0005618//cell wall	GO:0004553//hydrolase activity, hydrolyzing O-glycosyl compounds;GO:0016762//xyloglucan:xyloglucosyl transferase activity	GO:0006073//cellular glucan metabolic process	gi|460378802|ref|XP_004235157.1|/1.26511e-169/PREDICTED: probable xyloglucan endotransglucosylase/hydrolase protein 23-like [Solanum lycopersicum]
Solyc08g014570	332.851	1274.95	1.93749	4.19e-08	4.47e-06	K06694|1|1e-16|86.3|rcu:RCOM_1621740|26S proteasome non-ATPase regulatory subunit 10	GO:0005886//plasma membrane	-	-	gi|460398454|ref|XP_004244774.1|/0/PREDICTED: ankyrin repeat-containing protein At5g02620-like [Solanum lycopersicum]
Solyc11g042560	33.1644	126.995	1.93706	5.02e-05	0.00182048	K09286|1|8e-26|114|ath:AT1G01250|EREBP-like factor	GO:0005634//nucleus	GO:0003700//sequence-specific DNA binding transcription factor activity;GO:0003677//DNA binding	GO:0006355//regulation of transcription, DNA-dependent	gi|460410801|ref|XP_004250806.1|/7.69692e-101/PREDICTED: ethylene-responsive transcription factor ERF022-like [Solanum lycopersicum]
Solyc05g009950	32.9513	125.931	1.93422	5.67e-05	0.00201881	K08360|1|8e-53|204|pop:POPTR_743692|cytochrome b-561	GO:0016021//integral to membrane	GO:0008805//carbon-monoxide oxygenase activity	-	gi|460386574|ref|XP_004238973.1|/6.44414e-131/PREDICTED: uncharacterized protein LOC101267989 [Solanum lycopersicum]
Solyc02g089130	52.9863	202.187	1.932	8.57e-06	0.000415354	-	GO:0009531//secondary cell wall;GO:0005774//vacuolar membrane;GO:0031225//anchored to membrane;GO:0005886//plasma membrane	-	GO:0010413//glucuronoxylan metabolic process;GO:0009834//secondary cell wall biogenesis;GO:0009808//lignin metabolic process;GO:0010089//xylem development;GO:0045492//xylan biosynthetic process;GO:0009830//cell wall modification involved in abscission	gi|460372652|ref|XP_004232142.1|/0/PREDICTED: COBRA-like protein 4-like [Solanum lycopersicum]
Solyc09g098510	2288.56	8702.62	1.92701	1.57e-08	1.87e-06	K01115|1|9e-45|119|vcn:VOLCADRAFT_99471|phospholipase D [EC:3.1.4.4]	-	-	-	gi|460415630|ref|XP_004253161.1|/1.26074e-120/PREDICTED: uncharacterized protein LOC101261503 [Solanum lycopersicum]
Solyc01g086800	14.3486	54.5474	1.9266	0.00272948	0.0428136	K11253|1|5e-41|163|mtr:MTR_1g105310|histone H3	GO:0000786//nucleosome;GO:0016021//integral to membrane;GO:0009536//plastid;GO:0005634//nucleus	GO:0003677//DNA binding;GO:0046982//protein heterodimerization activity	GO:0016192//vesicle-mediated transport;GO:0006334//nucleosome assembly;GO:0008283//cell proliferation	gi|470105592|ref|XP_004289166.1|/7.96342e-40/PREDICTED: histone H3.2-like [Fragaria vesca subsp. vesca]
Solyc01g098980	29.708	112.354	1.91913	0.000130096	0.00402825	K10406|1|2e-170|599|zma:100285120|kinesin family member C2/C3	GO:0043234//protein complex;GO:0015630//microtubule cytoskeleton;GO:0005737//cytoplasm;GO:0044430//cytoskeletal part	GO:0003777//microtubule motor activity;GO:0004672//protein kinase activity;GO:0016491//oxidoreductase activity;GO:0000166//nucleotide binding	GO:0007017//microtubule-based process;GO:0016310//phosphorylation	gi|460370871|ref|XP_004231272.1|/0/PREDICTED: kinesin-4-like [Solanum lycopersicum]
Solyc04g076730	101.297	381.819	1.9143	8.51e-07	5.98e-05	K03969|1|4e-15|77.8|vvi:100250774|phage shock protein A	-	-	-	gi|359478249|ref|XP_003632092.1|/5.93043e-14/PREDICTED: uncharacterized protein LOC100855082 [Vitis vinifera]
Solyc01g073970	80.6774	303.227	1.91016	1.79e-06	0.000112178	K11253|1|5e-71|263|aly:ARALYDRAFT_471009|histone H3	GO:0000786//nucleosome;GO:0005634//nucleus;GO:0009536//plastid	GO:0003677//DNA binding;GO:0046982//protein heterodimerization activity	GO:0008283//cell proliferation;GO:0006334//nucleosome assembly	gi|470105592|ref|XP_004289166.1|/5.65486e-70/PREDICTED: histone H3.2-like [Fragaria vesca subsp. vesca]
Solyc12g011090	38.1595	142.9	1.90489	4.18e-05	0.00155978	-	-	-	-	-
Solyc09g075550	26.7323	99.6915	1.89889	0.000234731	0.00647363	K00770|1|0.0|1791|vvi:100243459|1,4-beta-D-xylan synthase [EC:2.4.2.24]	GO:0016021//integral to membrane;GO:0005794//Golgi apparatus	GO:0051753//mannan synthase activity;GO:0016760//cellulose synthase (UDP-forming) activity	GO:0000226//microtubule cytoskeleton organization;GO:0042127//regulation of cell proliferation;GO:0009414//response to water deprivation;GO:0000911//cytokinesis by cell plate formation;GO:0000724//double-strand break repair via homologous recombination;GO:0009651//response to salt stress;GO:0009965//leaf morphogenesis;GO:0030244//cellulose biosynthetic process;GO:0010583//response to cyclopenteno…	gi|460403826|ref|XP_004247387.1|/0/PREDICTED: cellulose synthase-like protein D5-like [Solanum lycopersicum]
Solyc01g073840	16.4224	61.151	1.89671	0.00160705	0.0289933	-	-	-	GO:0006952//defense response;GO:0044763;GO:0044710;GO:0071702;GO:0006820//anion transport;GO:0071705;GO:1901700;GO:0044767;GO:0002376//immune system process;GO:1901698	gi|460366998|ref|XP_004229362.1|/0/PREDICTED: uncharacterized protein LOC101255237 [Solanum lycopersicum]
Solyc05g053380	20.6197	76.6472	1.89421	0.000827514	0.0175637	K13424|1|5e-25|113|rcu:RCOM_0849600|WRKY transcription factor 33	-	-	-	gi|460388448|ref|XP_004239879.1|/8.78969e-174/PREDICTED: probable WRKY transcription factor 23-like [Solanum lycopersicum]
Solyc01g105770	140.463	522.077	1.89407	5.18e-07	3.99e-05	K14297|1|7e-27|119|ath:AT1G10390|nuclear pore complex protein Nup98-Nup96;K14709|5|2e-26|118|vcn:VOLCADRAFT_104214|solute carrier family 39 (zinc transporter), member 1/2/3	-	-	GO:0009791//post-embryonic development	gi|460371056|ref|XP_004231361.1|/0/PREDICTED: periaxin-like [Solanum lycopersicum]
Solyc01g098690	37.2007	137.849	1.88969	7.49e-05	0.00255752	K13420|1|3e-74|278|ath:AT5G46330|LRR receptor-like serine/threonine-protein kinase FLS2 [EC:2.7.11.1];K13415|2|1e-73|276|pop:POPTR_650846|protein brassinosteroid insensitive 1 [EC:2.7.10.1 2.7.11.1]	-	-	-	gi|460370853|ref|XP_004231263.1|/0/PREDICTED: leucine-rich repeat receptor protein kinase EXS-like [Solanum lycopersicum]
Solyc11g069420	20.6742	76.5703	1.88895	0.000669233	0.0149608	-	-	-	-	gi|255578854|ref|XP_002530281.1|/1.47858e-25/conserved hypothetical protein [Ricinus communis]
Solyc07g054810	16.9006	62.5295	1.88746	0.00156654	0.0285306	-	-	-	-	-
Solyc03g005320	85.566	316.409	1.88668	2.15e-06	0.000131996	K15397|1|0.0|872|gmx:100782027|3-ketoacyl-CoA synthase [EC:2.3.1.-]	GO:0016020//membrane	GO:0009922//fatty acid elongase activity	GO:0006633//fatty acid biosynthetic process;GO:0009611//response to wounding;GO:0009409//response to cold;GO:0010345//suberin biosynthetic process;GO:0006970//response to osmotic stress;GO:0009416//response to light stimulus	gi|460376478|ref|XP_004234025.1|/0/PREDICTED: 3-ketoacyl-CoA synthase 11-like [Solanum lycopersicum]
Solyc10g018340	43.7939	161.689	1.88442	2.62e-05	0.0010545	K14488|1|4e-35|144|vvi:100260776|SAUR family protein	GO:0005739//mitochondrion	-	GO:0009862//systemic acquired resistance, salicylic acid mediated signaling pathway;GO:0009733//response to auxin stimulus;GO:1900057//positive regulation of leaf senescence	gi|460406207|ref|XP_004248559.1|/2.05788e-75/PREDICTED: auxin-induced protein 15A-like [Solanum lycopersicum]
Solyc03g097530	28.541	105.325	1.88374	0.000155339	0.00466668	-	GO:0005576//extracellular region	GO:0005515//protein binding	GO:0001709//cell fate determination;GO:0048653//anther development;GO:0009408//response to heat	gi|460379198|ref|XP_004235351.1|/1.52666e-99/PREDICTED: uncharacterized protein LOC101268557 [Solanum lycopersicum]
Solyc06g050900	62.2332	229.444	1.88238	8.59e-06	0.000415354	K14638|1|2e-140|498|smo:SELMODRAFT_97812|solute carrier family 15 (peptide/histidine transporter), member 3/4	GO:0005886//plasma membrane	GO:0005215//transporter activity	GO:0006857//oligopeptide transport;GO:0009624//response to nematode	gi|460390580|ref|XP_004240906.1|/0/PREDICTED: probable peptide/nitrate transporter At2g40460-like [Solanum lycopersicum]
Solyc08g080280	15.0943	55.4962	1.87838	0.00223035	0.0368697	-	-	-	-	gi|460401231|ref|XP_004246130.1|/0/PREDICTED: uncharacterized protein LOC101266546 [Solanum lycopersicum]
Solyc02g090960	44.2721	162.621	1.87704	2.76e-05	0.00109884	-	GO:0048046//apoplast	GO:0004871//signal transducer activity	GO:0006949//syncytium formation;GO:0007267//cell-cell signaling	gi|460372411|ref|XP_004232024.1|/3.21457e-65/PREDICTED: protein RALF-like 34-like [Solanum lycopersicum]
Solyc05g051870	110.172	404.348	1.87584	1.12e-06	7.52e-05	K01834|1|2e-34|142|vvi:100245371|2,3-bisphosphoglycerate-dependent phosphoglycerate mutase [EC:5.4.2.1];K03036|2|5e-24|107|aly:ARALYDRAFT_336019|26S proteasome regulatory subunit N6	GO:0005576//extracellular region	-	GO:0007030//Golgi organization;GO:0006816//calcium ion transport;GO:0042546//cell wall biogenesis;GO:0019344//cysteine biosynthetic process;GO:0009651//response to salt stress	gi|460383404|ref|XP_004237415.1|/7.30413e-41/PREDICTED: pollen-specific protein C13-like [Solanum lycopersicum]
Solyc11g011180	56.4972	207.297	1.87545	9.05e-06	0.000431279	K13415|1|3e-60|232|ath:AT4G39400|protein brassinosteroid insensitive 1 [EC:2.7.10.1 2.7.11.1];K13420|4|6e-59|228|sbi:SORBI_06g028760|LRR receptor-like serine/threonine-protein kinase FLS2 [EC:2.7.11.1]	-	-	-	gi|460410225|ref|XP_004250531.1|/0/PREDICTED: probable LRR receptor-like serine/threonine-protein kinase At4g36180-like [Solanum lycopersicum]
Solyc01g080870	60.9052	222.895	1.87173	1.01e-05	0.000472925	K14638|1|1e-142|504|ppp:PHYPADRAFT_134814|solute carrier family 15 (peptide/histidine transporter), member 3/4	GO:0005886//plasma membrane	GO:0015112//nitrate transmembrane transporter activity	GO:0046686//response to cadmium ion;GO:0010167//response to nitrate;GO:0015706//nitrate transport	gi|460367286|ref|XP_004229506.1|/0/PREDICTED: nitrate transporter 1.5-like [Solanum lycopersicum]
Solyc02g077060	65.5855	239.676	1.86964	5.41e-06	0.000281094	-	-	-	-	gi|460372477|ref|XP_004232056.1|/2.63332e-35/PREDICTED: probable disease resistance protein At5g66900-like [Solanum lycopersicum]
Solyc10g075070	5505.37	20112	1.86915	2.45e-08	2.82e-06	-	-	GO:0008289//lipid binding	GO:0006950//response to stress;GO:0006869//lipid transport	gi|460407212|ref|XP_004249048.1|/4.39052e-62/PREDICTED: non-specific lipid-transfer protein 2-like isoform 2 [Solanum lycopersicum]
Solyc10g007280	944.197	3441.89	1.86604	4.21e-08	4.47e-06	K13120|1|4e-144|509|vvi:100263357|protein FAM32A;K08900|2|4e-132|469|mtr:MTR_2g076970|mitochondrial chaperone BCS1	GO:0005739//mitochondrion;GO:0005886//plasma membrane	GO:0005524//ATP binding;GO:0016887//ATPase activity	GO:0052542//defense response by callose deposition;GO:0009611//response to wounding;GO:0009627//systemic acquired resistance;GO:0010200//response to chitin;GO:0009697//salicylic acid biosynthetic process;GO:0009612//response to mechanical stimulus	gi|460405559|ref|XP_004248243.1|/0/PREDICTED: probable mitochondrial chaperone BCS1-A-like [Solanum lycopersicum]
Solyc10g083290	291.453	1061.65	1.86498	1.46e-07	1.31e-05	K01193|1|0.0|829|rcu:RCOM_0293270|beta-fructofuranosidase [EC:3.2.1.26]	-	GO:0004575//sucrose alpha-glucosidase activity	GO:0005975//carbohydrate metabolic process	gi|20805672|gb|AAM28823.1|AF506004_2/0/cell-wall invertase [Solanum lycopersicum]
Solyc01g107100	241.393	879.238	1.86487	1.78e-07	1.52e-05	-	GO:0005739//mitochondrion	GO:0016798//hydrolase activity, acting on glycosyl bonds	GO:0008152//metabolic process	gi|356574315|ref|XP_003555294.1|/1.25487e-16/PREDICTED: LOW QUALITY PROTEIN: probable beta-D-xylosidase 5-like [Glycine max]
Solyc05g012890	81.7404	297.594	1.86422	3.13e-06	0.000182618	K13457|1|5e-68|258|pop:POPTR_755797|disease resistance protein RPM1	-	-	-	gi|460387612|ref|XP_004239470.1|/0/PREDICTED: putative late blight resistance protein homolog R1B-23-like [Solanum lycopersicum]
Solyc11g012980	85.6725	311.188	1.86088	2.94e-06	0.000172919	K09286|1|4e-21|99.4|pop:POPTR_778889|EREBP-like factor	-	-	GO:1900030//regulation of pectin biosynthetic process;GO:0006351//transcription, DNA-dependent	gi|460410290|ref|XP_004250563.1|/4.03215e-126/PREDICTED: ethylene-responsive transcription factor ERF012-like [Solanum lycopersicum]
Solyc10g080400	25.4042	92.1092	1.85828	0.000379258	0.00954639	-	GO:0005634//nucleus	GO:0005515//protein binding	GO:0010224//response to UV-B;GO:0007113//endomitotic cell cycle;GO:0007088//regulation of mitosis;GO:0010091//trichome branching;GO:0042023//DNA endoreduplication;GO:0040020//regulation of meiosis	gi|460408657|ref|XP_004249759.1|/1.25335e-128/PREDICTED: uncharacterized protein LOC101260887 [Solanum lycopersicum]
Solyc12g056360	296.02	1073.25	1.85822	1.78e-07	1.52e-05	-	-	-	GO:0009651//response to salt stress;GO:0009817//defense response to fungus, incompatible interaction	gi|53830845|gb|AAU95245.1|/2.58423e-102/putative thaumatin-like protein [Solanum tuberosum]
Solyc02g084580	29.7601	107.618	1.85447	0.000280246	0.00746011	K12837|1|2e-17|85.5|vcn:VOLCADRAFT_82970|splicing factor U2AF 65 kDa subunit;K06640|2|5e-17|84.0|vcn:VOLCADRAFT_88866|serine/threonine-protein kinase ATR [EC:2.7.11.1]	GO:0009536//plastid	GO:0008270//zinc ion binding;GO:0003910//DNA ligase (ATP) activity;GO:0003677//DNA binding;GO:0005524//ATP binding;GO:0016787//hydrolase activity	GO:0006310//DNA recombination;GO:0051103//DNA ligation involved in DNA repair;GO:0030001//metal ion transport	gi|413951841|gb|AFW84490.1|/1.97296e-22/hypothetical protein ZEAMMB73_428483, partial [Zea mays]
Solyc05g008620	17.6984	63.925	1.85276	0.00150594	0.027631	K10734|1|5e-63|239|vvi:100253648|GINS complex subunit 3	GO:0000811//GINS complex	-	GO:0006261//DNA-dependent DNA replication;GO:0009793//embryo development ending in seed dormancy	gi|460386388|ref|XP_004238880.1|/3.50679e-104/PREDICTED: probable DNA replication complex GINS protein PSF3-like [Solanum lycopersicum]
Solyc04g077570	110.224	397.775	1.85151	1.69e-06	0.000106334	-	-	-	-	gi|225458898|ref|XP_002285433.1|/2.5889e-30/PREDICTED: uncharacterized protein LOC100267736 [Vitis vinifera]
Solyc02g091920	1842.77	6607.82	1.8423	4.03e-08	4.32e-06	K08235|1|2e-140|496|pop:POPTR_718004|xyloglucan:xyloglucosyl transferase [EC:2.4.1.207]	GO:0005618//cell wall;GO:0048046//apoplast	GO:0016762//xyloglucan:xyloglucosyl transferase activity;GO:0004553//hydrolase activity, hydrolyzing O-glycosyl compounds	GO:0009414//response to water deprivation;GO:0006073//cellular glucan metabolic process	gi|350535901|ref|NP_001234475.1|/2.23521e-177/xyloglucan endotransglucosylase-hydrolase XTH7 [Solanum lycopersicum]
Solyc01g100030	289.122	1035.56	1.84066	1.72e-07	1.49e-05	K01520|1|7e-70|260|aly:ARALYDRAFT_905922|dUTP pyrophosphatase [EC:3.6.1.23]	GO:0005829//cytosol	GO:0004170//dUTP diphosphatase activity;GO:0042802//identical protein binding;GO:0000287//magnesium ion binding	GO:0006281//DNA repair;GO:0006261//DNA-dependent DNA replication;GO:0006226//dUMP biosynthetic process;GO:0046080//dUTP metabolic process	gi|350539233|ref|NP_001233870.1|/2.55467e-90/deoxyuridine 5'-triphosphate nucleotidohydrolase [Solanum lycopersicum]
Solyc06g064820	49.2152	176.249	1.84044	2.59e-05	0.00104457	K00514|1|3e-26|117|rcu:RCOM_1428040|zeta-carotene desaturase [EC:1.3.5.6];K01206|2|2e-25|115|aly:ARALYDRAFT_475890|alpha-L-fucosidase [EC:3.2.1.51]	GO:0005576//extracellular region;GO:0016023//cytoplasmic membrane-bounded vesicle	GO:0004091//carboxylesterase activity	GO:0006629//lipid metabolic process	gi|460392615|ref|XP_004241911.1|/0/PREDICTED: GDSL esterase/lipase At1g71691-like [Solanum lycopersicum]
Solyc03g118780	281.726	1008.75	1.84021	2.39e-07	1.99e-05	-	GO:0009506//plasmodesma;GO:0005576//extracellular region;GO:0016020//membrane	-	GO:0010075//regulation of meristem growth;GO:0000911//cytokinesis by cell plate formation;GO:0008283//cell proliferation;GO:0000226//microtubule cytoskeleton organization;GO:0051707//response to other organism	gi|460380128|ref|XP_004235810.1|/5.51181e-149/PREDICTED: thaumatin-like protein-like [Solanum lycopersicum]
Solyc01g090120	35.6075	127.442	1.83959	0.000127475	0.00396825	-	GO:0031225//anchored to membrane	-	-	gi|460367758|ref|XP_004229737.1|/3.9735e-107/PREDICTED: blue copper protein-like [Solanum lycopersicum]
Solyc03g119990	37.1487	132.624	1.83596	0.000112519	0.00357371	-	GO:0005737//cytoplasm	GO:0016787//hydrolase activity	GO:0008152//metabolic process	gi|460379949|ref|XP_004235721.1|/0/PREDICTED: uncharacterized protein LOC101253985 [Solanum lycopersicum]
Solyc08g078900	5064.3	18072.5	1.83536	3.46e-08	3.77e-06	-	-	GO:0008289//lipid binding	GO:0006869//lipid transport	gi|350539960|ref|NP_001233824.1|/1.09118e-76/arachidonic acid-induced DEA1 precursor [Solanum lycopersicum]
Solyc06g007170	326.315	1163.06	1.83359	2.1e-07	1.78e-05	-	GO:0005783//endoplasmic reticulum	-	GO:0006333//chromatin assembly or disassembly;GO:0009620//response to fungus	gi|460389530|ref|XP_004240405.1|/0/PREDICTED: uncharacterized protein LOC101266827 [Solanum lycopersicum]
Solyc02g067610	176.771	627.843	1.82852	4.55e-07	3.55e-05	-	-	-	-	-
Solyc11g020100	16.1573	57.3556	1.82775	0.00246084	0.0396467	K13457|1|3e-65|248|vvi:100252764|disease resistance protein RPM1	-	-	-	gi|460409971|ref|XP_004250409.1|/0/PREDICTED: putative late blight resistance protein homolog R1B-16-like [Solanum lycopersicum]
Solyc09g015170	39.329	139.194	1.82343	8.46e-05	0.00284134	K13415|1|6e-83|307|rcu:RCOM_0478150|protein brassinosteroid insensitive 1 [EC:2.7.10.1 2.7.11.1]	GO:0005618//cell wall;GO:0016020//membrane	GO:0016491//oxidoreductase activity;GO:0016301//kinase activity	GO:0016310//phosphorylation	gi|460401585|ref|XP_004246299.1|/0/PREDICTED: probably inactive leucine-rich repeat receptor-like protein kinase IMK2-like [Solanum lycopersicum]
Solyc02g086260	141.102	499.347	1.8233	1.27e-06	8.44e-05	-	-	-	-	gi|460377590|ref|XP_004234574.1|/1.05875e-48/PREDICTED: uncharacterized protein LOC101258532 [Solanum lycopersicum]
Solyc04g005040	2435.59	8612.35	1.82213	5.85e-08	6.01e-06	K07761|1|4e-106|382|ath:AT1G59970|gelatinase A [EC:3.4.24.24]	GO:0031225//anchored to membrane;GO:0005576//extracellular region	GO:0046872//metal ion binding;GO:0004222//metalloendopeptidase activity	GO:0030968//endoplasmic reticulum unfolded protein response;GO:0009693//ethylene biosynthetic process;GO:0010200//response to chitin;GO:0006508//proteolysis	gi|395759049|emb|CCH68443.1|/0/matrix metalloproteinase precursor [Solanum lycopersicum]
Solyc11g069730	29.1257	102.959	1.82171	0.000250961	0.00683629	-	-	-	-	gi|462403001|gb|EMJ08558.1|/4.85156e-13/hypothetical protein PRUPE_ppa013763mg [Prunus persica]
Solyc02g089050	67.2284	237.468	1.82059	1.44e-05	0.000641344	-	-	-	-	gi|460375736|ref|XP_004233660.1|/0/PREDICTED: protein LONGIFOLIA 2-like [Solanum lycopersicum]
Solyc08g080040	74.7259	263.648	1.81893	7e-06	0.000348257	K05277|1|1e-172|604|vvi:100233142|leucoanthocyanidin dioxygenase [EC:1.14.11.19]	-	GO:0016702//oxidoreductase activity, acting on single donors with incorporation of molecular oxygen, incorporation of two atoms of oxygen;GO:0050589//leucocyanidin oxygenase activity	GO:0009753//response to jasmonic acid stimulus;GO:0009611//response to wounding;GO:0010023//proanthocyanidin biosynthetic process;GO:0007033//vacuole organization;GO:0055114//oxidation-reduction process	gi|310892809|gb|ADP37440.1|/0/anthocyanidin synthase [Solanum tuberosum]
Solyc03g007410	20.1415	71.018	1.81801	0.00161325	0.0290476	K13422|1|4e-13|73.9|gmx:100790854|transcription factor MYC2	GO:0005634//nucleus	GO:0005488//binding	GO:0010103//stomatal complex morphogenesis;GO:0006355//regulation of transcription, DNA-dependent;GO:0042127//regulation of cell proliferation	gi|460376986|ref|XP_004234277.1|/0/PREDICTED: transcription factor SPEECHLESS-like [Solanum lycopersicum]
Solyc03g112460	53.8882	189.993	1.8179	3.62e-05	0.00136782	K14548|1|2e-70|265|rcu:RCOM_0962120|U3 small nucleolar RNA-associated protein 4	-	GO:0016846//carbon-sulfur lyase activity	GO:0009987//cellular process;GO:0050896//response to stimulus;GO:0009888//tissue development;GO:0048364//root development;GO:0009908//flower development;GO:0065007//biological regulation;GO:0008152//metabolic process;GO:0009793//embryo development ending in seed dormancy	gi|460381011|ref|XP_004236246.1|/0/PREDICTED: tryptophan aminotransferase-related protein 2-like [Solanum lycopersicum]
Solyc01g105070	579.727	2043.54	1.81762	1.12e-07	1.05e-05	K00430|1|6e-138|488|rcu:RCOM_1182920|peroxidase [EC:1.11.1.7]	GO:0005618//cell wall;GO:0016020//membrane;GO:0048046//apoplast	GO:0046872//metal ion binding;GO:0020037//heme binding;GO:0004601//peroxidase activity	GO:0006979//response to oxidative stress;GO:0050832//defense response to fungus;GO:0045730//respiratory burst;GO:0055114//oxidation-reduction process	gi|83318804|emb|CAG25463.1|/0/cationic peroxidase [Solanum lycopersicum]
Solyc10g080960	448.346	1579.2	1.81651	1.55e-07	1.36e-05	K14491|1|7e-24|108|sbi:SORBI_10g005580|two-component response regulator ARR-B family	-	GO:0005488//binding	GO:0006355//regulation of transcription, DNA-dependent	gi|460407772|ref|XP_004249324.1|/1.89206e-153/PREDICTED: putative two-component response regulator ARR13-like [Solanum lycopersicum]
Solyc03g121600	169.113	595.217	1.81543	7.94e-07	5.65e-05	K15403|1|0.0|703|vvi:100246317|fatty acid omega-hydroxy dehydrogenase [EC:1.1.-.-]	-	GO:0050660//flavin adenine dinucleotide binding;GO:0008812//choline dehydrogenase activity;GO:0046593//mandelonitrile lyase activity	GO:0006066//alcohol metabolic process;GO:0009553//embryo sac development;GO:0007267//cell-cell signaling;GO:0010430//fatty acid omega-oxidation	gi|460381301|ref|XP_004236390.1|/0/PREDICTED: protein HOTHEAD-like [Solanum lycopersicum]
Solyc04g079360	892.318	3133.21	1.81201	1.11e-07	1.05e-05	K09422|1|6e-49|192|rcu:RCOM_1153840|myb proto-oncogene protein, plant	-	GO:0005488//binding	-	gi|460384980|ref|XP_004238184.1|/3.15687e-147/PREDICTED: transcriptional activator Myb-like [Solanum lycopersicum]
Solyc09g072750	2301.25	8056.79	1.80779	8.79e-08	8.72e-06	-	-	-	-	gi|460404063|ref|XP_004247504.1|/3.95707e-54/PREDICTED: uncharacterized protein LOC101247657 [Solanum lycopersicum]
Solyc03g043700	186.861	653.543	1.80632	8.26e-07	5.84e-05	K14431|1|4e-09|60.8|aly:ARALYDRAFT_311885|transcription factor TGA;K08332|2|1e-08|59.3|vcn:VOLCADRAFT_41528|vacuolar protein 8	GO:0009507//chloroplast	-	-	gi|460377871|ref|XP_004234710.1|/0/PREDICTED: U-box domain-containing protein 4-like [Solanum lycopersicum]
Solyc09g008320	215.298	751.57	1.80358	5.51e-07	4.18e-05	K08235|1|2e-149|526|gmx:100796698|xyloglucan:xyloglucosyl transferase [EC:2.4.1.207]	GO:0005618//cell wall;GO:0048046//apoplast	GO:0004553//hydrolase activity, hydrolyzing O-glycosyl compounds;GO:0016762//xyloglucan:xyloglucosyl transferase activity	GO:0042546//cell wall biogenesis;GO:0006073//cellular glucan metabolic process;GO:0016998//cell wall macromolecule catabolic process	gi|460402227|ref|XP_004246615.1|/0/PREDICTED: probable xyloglucan endotransglucosylase/hydrolase protein 32-like [Solanum lycopersicum]
Solyc05g009120	406.301	1411.15	1.79625	2.65e-07	2.17e-05	-	GO:0016020//membrane	GO:0008375//acetylglucosaminyltransferase activity	-	gi|460386450|ref|XP_004238911.1|/0/PREDICTED: uncharacterized protein LOC101249358 [Solanum lycopersicum]
Solyc01g087760	19.9309	69.1075	1.79384	0.00143894	0.0266437	-	-	GO:0008233//peptidase activity	GO:0006508//proteolysis	gi|460408141|ref|XP_004249505.1|/1.40708e-20/PREDICTED: subtilisin-like protease-like [Solanum lycopersicum]
Solyc02g089350	880.435	3037.81	1.78674	1.3e-07	1.19e-05	-	-	-	-	gi|121689|sp|P27057.1|GAST1_SOLLC/1.46836e-65/RecName: Full=Protein GAST1; Flags: Precursor
Solyc00g206460	879.518	3034.18	1.78652	1.51e-07	1.34e-05	K03655|1|4e-10|63.2|gmx:100806552|ATP-dependent DNA helicase RecG [EC:3.6.4.12]	GO:0009505//plant-type cell wall	-	GO:0009741//response to brassinosteroid stimulus	gi|460416337|ref|XP_004253500.1|/4.76353e-98/PREDICTED: uncharacterized protein LOC101268088, partial [Solanum lycopersicum]
Solyc08g074620	1615.6	5572.16	1.78617	1.13e-07	1.06e-05	K00422|1|4e-144|509|vvi:100256583|polyphenol oxidase [EC:1.10.3.1]	-	GO:0004097//catechol oxidase activity;GO:0046872//metal ion binding	GO:0055114//oxidation-reduction process	gi|460401033|ref|XP_004246034.1|/0/PREDICTED: polyphenol oxidase E, chloroplastic-like isoform 1 [Solanum lycopersicum]
Solyc00g201160	18.5483	63.9122	1.78481	0.00225744	0.0372343	K04733|1|6e-52|202|smo:SELMODRAFT_33807|interleukin-1 receptor-associated kinase 4 [EC:2.7.11.1];K13430|2|7e-51|198|zma:100283091|serine/threonine-protein kinase PBS1 [EC:2.7.11.1];K00924|5|1e-50|197|osa:4333912|[EC:2.7.1.-]	-	GO:0005524//ATP binding;GO:0004674//protein serine/threonine kinase activity	GO:0048544//recognition of pollen;GO:0006468//protein phosphorylation	gi|460385731|ref|XP_004238555.1|/2.30599e-127/PREDICTED: uncharacterized protein LOC101251977 [Solanum lycopersicum]
Solyc07g064830	20.0895	69.1246	1.78276	0.00176035	0.0309798	K00700|1|2e-133|474|cme:CMH144C|1,4-alpha-glucan branching enzyme [EC:2.4.1.18]	GO:0009507//chloroplast	GO:0043169//cation binding;GO:0003844//1,4-alpha-glucan branching enzyme activity;GO:0004556//alpha-amylase activity	GO:0009793//embryo development ending in seed dormancy;GO:0005978//glycogen biosynthetic process	gi|460397086|ref|XP_004244099.1|/0/PREDICTED: 1,4-alpha-glucan-branching enzyme 3, chloroplastic/amyloplastic-like [Solanum lycopersicum]
Solyc11g007930	153.805	528.905	1.7819	1.68e-06	0.000106136	K11252|1|2e-61|232|vvi:100253462|histone H2B	GO:0000786//nucleosome;GO:0005730//nucleolus;GO:0009507//chloroplast	GO:0003677//DNA binding;GO:0046982//protein heterodimerization activity	GO:0006334//nucleosome assembly	gi|460409198|ref|XP_004250026.1|/4.44043e-70/PREDICTED: probable histone H2B.1-like [Solanum lycopersicum]
Solyc06g069070	108.678	373.679	1.78173	6.09e-06	0.000312865	-	-	-	-	gi|460392057|ref|XP_004241634.1|/1.90624e-49/PREDICTED: probable non-specific lipid-transfer protein AKCS9-like [Solanum lycopersicum]
Solyc12g100010	147.641	506.852	1.77948	1.89e-06	0.000117268	K13420|1|7e-85|314|ath:AT5G46330|LRR receptor-like serine/threonine-protein kinase FLS2 [EC:2.7.11.1]	-	-	-	gi|460415003|ref|XP_004252850.1|/0/PREDICTED: receptor-like protein 12-like [Solanum lycopersicum]
Solyc09g097790	30.823	105.793	1.77916	0.00048203	0.0116575	-	GO:0005576//extracellular region	GO:0005515//protein binding	GO:0009684//indoleacetic acid biosynthetic process;GO:0009651//response to salt stress;GO:0009269//response to desiccation;GO:0009409//response to cold;GO:0009751//response to salicylic acid stimulus;GO:0009627//systemic acquired resistance;GO:0009737//response to abscisic acid stimulus;GO:0006569//tryptophan catabolic process;GO:0031347//regulation of defense response;GO:0009723//response to eth…	gi|460405129|ref|XP_004248029.1|/8.14559e-11/PREDICTED: uncharacterized protein LOC101244811 [Solanum lycopersicum]
Solyc01g009040	18.92	64.8312	1.77678	0.00236363	0.0385757	K05868|1|2e-145|513|vvi:100261859|cyclin B	GO:0044424//intracellular part	-	GO:0051726//regulation of cell cycle	gi|460365172|ref|XP_004228478.1|/0/PREDICTED: G2/mitotic-specific cyclin-2-like [Solanum lycopersicum]
Solyc01g006290	569.249	1950	1.77634	2.45e-07	2.03e-05	K00430|1|1e-120|431|vvi:100265513|peroxidase [EC:1.11.1.7]	GO:0005794//Golgi apparatus;GO:0005576//extracellular region	GO:0046872//metal ion binding;GO:0020037//heme binding;GO:0004601//peroxidase activity	GO:0006979//response to oxidative stress;GO:0002215//defense response to nematode;GO:0009908//flower development;GO:0055114//oxidation-reduction process	gi|460365564|ref|XP_004228671.1|/0/PREDICTED: lignin-forming anionic peroxidase-like [Solanum lycopersicum]
Solyc04g014290	127.071	435.225	1.77613	3.32e-06	0.000189344	K01115|1|6e-07|50.4|vcn:VOLCADRAFT_99471|phospholipase D [EC:3.1.4.4]	-	-	-	gi|460381938|ref|XP_004236698.1|/8.89793e-31/PREDICTED: uncharacterized protein LOC101245638 [Solanum lycopersicum]
Solyc11g073110	47.513	162.719	1.77599	7.21e-05	0.0024852	-	GO:0005886//plasma membrane	-	-	gi|460412131|ref|XP_004251456.1|/0/PREDICTED: uncharacterized protein LOC101267866 [Solanum lycopersicum]
Solyc01g006550	108.151	370.386	1.77599	5.24e-06	0.000275068	K13420|1|4e-81|301|aly:ARALYDRAFT_356368|LRR receptor-like serine/threonine-protein kinase FLS2 [EC:2.7.11.1]	-	-	-	gi|460365467|ref|XP_004228623.1|/0/PREDICTED: receptor-like protein 12-like [Solanum lycopersicum]
Solyc01g107290	1465.55	5014	1.77451	1.52e-07	1.34e-05	K15692|1|1e-08|58.5|bdi:100845565|E3 ubiquitin-protein ligase RNF13 [EC:6.3.2.19];K11982|2|3e-08|57.4|zma:100383341|E3 ubiquitin-protein ligase RNF115/126 [EC:6.3.2.19]	-	-	-	gi|460369734|ref|XP_004230712.1|/4.49735e-161/PREDICTED: uncharacterized protein LOC101244425, partial [Solanum lycopersicum]
Solyc03g116510	187.552	640.855	1.77271	1.29e-06	8.56e-05	-	-	-	-	gi|255553125|ref|XP_002517605.1|/4.92017e-13/conserved hypothetical protein [Ricinus communis]
Solyc11g016930	20.7807	70.9796	1.77216	0.00157919	0.0286925	K13416|1|2e-15|80.1|rcu:RCOM_1534760|brassinosteroid insensitive 1-associated receptor kinase 1 [EC:2.7.10.1 2.7.11.1];K13418|3|4e-14|75.9|vvi:100247683|somatic embryogenesis receptor kinase 1 [EC:2.7.10.1 2.7.11.1]	GO:0009507//chloroplast;GO:0005634//nucleus;GO:0005886//plasma membrane	GO:0004672//protein kinase activity	GO:0007165//signal transduction	gi|460410328|ref|XP_004250582.1|/7.06503e-97/PREDICTED: F-box/kelch-repeat protein At3g06240-like [Solanum lycopersicum]
Solyc02g080160	51.2321	174.905	1.77145	6.46e-05	0.00225536	K08235|1|9e-125|444|gmx:100790013|xyloglucan:xyloglucosyl transferase [EC:2.4.1.207]	GO:0048046//apoplast;GO:0005618//cell wall	GO:0004553//hydrolase activity, hydrolyzing O-glycosyl compounds;GO:0016762//xyloglucan:xyloglucosyl transferase activity	GO:0006073//cellular glucan metabolic process	gi|460373883|ref|XP_004232742.1|/0/PREDICTED: probable xyloglucan endotransglucosylase/hydrolase protein 8-like [Solanum lycopersicum]
Solyc08g068710	495.549	1691.05	1.77082	2.33e-07	1.97e-05	-	GO:0044459//plasma membrane part	GO:0008080//N-acetyltransferase activity;GO:0015116//sulfate transmembrane transporter activity	GO:0008272//sulfate transport	gi|460399514|ref|XP_004245284.1|/3.16321e-135/PREDICTED: tyramine N-feruloyltransferase 4/11-like [Solanum lycopersicum]
Solyc08g076900	191.908	654.62	1.77024	1.4e-06	9.07e-05	K14709|1|3e-61|233|vcn:VOLCADRAFT_104214|solute carrier family 39 (zinc transporter), member 1/2/3;K01115|4|3e-55|213|vcn:VOLCADRAFT_99471|phospholipase D [EC:3.1.4.4]	-	-	-	gi|21322711|emb|CAD22154.1|/1.55276e-111/pherophorin-dz1 protein [Volvox carteri f. nagariensis]
Solyc11g021060	1129.86	3849.41	1.7685	1.45e-07	1.31e-05	-	-	GO:0004867//serine-type endopeptidase inhibitor activity	GO:0010466//negative regulation of peptidase activity	gi|350534604|ref|NP_001234661.1|/7.62454e-136/proteinase inhibitor type-2 TR8 precursor [Solanum lycopersicum]
Solyc03g112100	34.8097	117.987	1.76107	0.000321807	0.00835607	-	-	GO:0016787//hydrolase activity	GO:0050896//response to stimulus	gi|460381065|ref|XP_004236273.1|/4.36303e-113/PREDICTED: high-affinity nitrate transporter 3.2-like [Solanum lycopersicum]
Solyc11g071740	1788.75	6051.59	1.75836	1.66e-07	1.45e-05	K13448|1|4e-47|185|pop:POPTR_1080059|calcium-binding protein CML	-	GO:0005509//calcium ion binding	-	gi|460411634|ref|XP_004251211.1|/4.4088e-110/PREDICTED: calcium-binding protein CML38-like [Solanum lycopersicum]
Solyc03g026040	27.3715	92.5985	1.75832	0.000591229	0.0136019	K13415|1|8e-148|523|rcu:RCOM_0478150|protein brassinosteroid insensitive 1 [EC:2.7.10.1 2.7.11.1]	GO:0016020//membrane;GO:0009507//chloroplast	GO:0019199//transmembrane receptor protein kinase activity;GO:0005515//protein binding;GO:0000166//nucleotide binding;GO:0016491//oxidoreductase activity;GO:0016787//hydrolase activity;GO:0004674//protein serine/threonine kinase activity	GO:0010103//stomatal complex morphogenesis;GO:0010234//tapetal cell fate specification;GO:0006468//protein phosphorylation;GO:0000165//MAPK cascade;GO:0009556//microsporogenesis;GO:0002237//response to molecule of bacterial origin	gi|460377322|ref|XP_004234442.1|/0/PREDICTED: leucine-rich repeat receptor protein kinase EXS-like [Solanum lycopersicum]
Solyc03g093120	194.834	658.401	1.75672	1.42e-06	9.12e-05	K14504|1|4e-135|478|vvi:100256520|xyloglucan:xyloglucosyl transferase TCH4 [EC:2.4.1.207];K08235|2|2e-134|476|vvi:100252949|xyloglucan:xyloglucosyl transferase [EC:2.4.1.207]	GO:0048046//apoplast;GO:0005618//cell wall	GO:0004553//hydrolase activity, hydrolyzing O-glycosyl compounds;GO:0016762//xyloglucan:xyloglucosyl transferase activity	GO:0006073//cellular glucan metabolic process	gi|460378804|ref|XP_004235158.1|/1.25745e-169/PREDICTED: probable xyloglucan endotransglucosylase/hydrolase protein 23-like [Solanum lycopersicum]
Solyc01g111330	43.1547	145.827	1.75667	0.000131822	0.00407602	-	GO:0031225//anchored to membrane;GO:0005576//extracellular region	-	GO:0010075//regulation of meristem growth;GO:0042545//cell wall modification;GO:0009664//plant-type cell wall organization;GO:0051707//response to other organism;GO:0048653//anther development	gi|460370367|ref|XP_004231024.1|/0/PREDICTED: thaumatin-like protein-like [Solanum lycopersicum]
Solyc09g075970	30.3472	102.525	1.75634	0.000440673	0.0108825	-	GO:0005634//nucleus;GO:0005739//mitochondrion	-	-	gi|460403770|ref|XP_004247360.1|/0/PREDICTED: uncharacterized protein LOC101254421 [Solanum lycopersicum]
Solyc02g063230	65.6872	221.917	1.75633	3.3e-05	0.00127283	-	-	-	-	gi|460376351|ref|XP_004233962.1|/8.68807e-148/PREDICTED: uncharacterized protein LOC101244837 [Solanum lycopersicum]
Solyc02g082920	2277.8	7678.53	1.75319	1.71e-07	1.49e-05	K01183|1|1e-80|297|pop:POPTR_831333|chitinase [EC:3.2.1.14]	GO:0005615//extracellular space;GO:0016023//cytoplasmic membrane-bounded vesicle	GO:0004568//chitinase activity	GO:0006032//chitin catabolic process;GO:0006952//defense response;GO:0051707//response to other organism;GO:0000272//polysaccharide catabolic process;GO:0016998//cell wall macromolecule catabolic process	gi|350534584|ref|NP_001234404.1|/1.16807e-149/acidic 26 kDa endochitinase precursor [Solanum lycopersicum]
Solyc07g053640	51.8713	174.854	1.75314	6.4e-05	0.00223692	K12813|1|5e-21|100|vcn:VOLCADRAFT_92322|pre-mRNA-splicing factor ATP-dependent RNA helicase DHX16 [EC:3.6.4.13]	-	-	GO:0006810//transport	gi|460395619|ref|XP_004243379.1|/0/PREDICTED: uncharacterized protein LOC101252504 isoform 1 [Solanum lycopersicum]
Solyc11g006250	1038.68	3497.26	1.75148	2.67e-07	2.18e-05	K01206|1|2e-21|101|ath:AT1G67830|alpha-L-fucosidase [EC:3.2.1.51];K00514|3|1e-18|92.0|rcu:RCOM_1428040|zeta-carotene desaturase [EC:1.3.5.6]	-	GO:0016788//hydrolase activity, acting on ester bonds	GO:0006629//lipid metabolic process	gi|339717983|gb|AEJ88779.1|/0/cutin-deficient 1 protein [Solanum lycopersicum]
Solyc06g063190	160.076	538.802	1.75099	2.36e-06	0.000142573	K05387|1|0.0|801|osa:4347123|glutamate receptor, ionotropic, other eukaryote	-	-	-	gi|460392517|ref|XP_004241862.1|/0/PREDICTED: glutamate receptor 2.7-like [Solanum lycopersicum]
Solyc04g008820	63.2962	212.939	1.75025	3.82e-05	0.00143959	K10802|1|5e-30|129|mtr:MTR_7g068280|high mobility group protein B1	GO:0005634//nucleus	GO:0003677//DNA binding	GO:0006261//DNA-dependent DNA replication	gi|460382285|ref|XP_004236870.1|/5.98576e-119/PREDICTED: high mobility group B protein 7-like [Solanum lycopersicum]
Solyc11g008140	70.7368	237.902	1.74984	2.58e-05	0.00104457	K01728|1|0.0|672|vvi:100246124|pectate lyase [EC:4.2.2.2]	GO:0005886//plasma membrane;GO:0031225//anchored to membrane	GO:0030570//pectate lyase activity	GO:0042547//cell wall modification involved in multidimensional cell growth;GO:0009814//defense response, incompatible interaction	gi|460409224|ref|XP_004250039.1|/0/PREDICTED: probable pectate lyase 12-like [Solanum lycopersicum]
Solyc12g098500	113.787	382.584	1.74944	5.17e-06	0.000272403	K01251|1|0.0|927|gmx:100786939|adenosylhomocysteinase [EC:3.3.1.1]	GO:0005773//vacuole;GO:0005886//plasma membrane	GO:0005507//copper ion binding;GO:0004013//adenosylhomocysteinase activity;GO:0000166//nucleotide binding	GO:0006730//one-carbon metabolic process;GO:0016441//posttranscriptional gene silencing;GO:0006346//methylation-dependent chromatin silencing	gi|460415276|ref|XP_004252985.1|/0/PREDICTED: adenosylhomocysteinase-like [Solanum lycopersicum]
Solyc12g006770	82.1096	275.022	1.74392	1.76e-05	0.000760381	-	-	-	-	gi|224081419|ref|XP_002306403.1|/4.73123e-16/predicted protein [Populus trichocarpa]
Solyc04g082840	56.0166	187.533	1.74322	5.51e-05	0.00197321	K00924|1|1e-150|530|ath:AT1G20930|[EC:2.7.1.-];K07760|4|2e-116|417|ath:AT3G54180|cyclin-dependent kinase [EC:2.7.11.22];K02206|5|2e-98|357|osa:4331415|cyclin-dependent kinase 2 [EC:2.7.11.22]	GO:0000307//cyclin-dependent protein kinase holoenzyme complex	GO:0008353//RNA polymerase II carboxy-terminal domain kinase activity;GO:0005524//ATP binding;GO:0004693//cyclin-dependent protein kinase activity	GO:0010389//regulation of G2/M transition of mitotic cell cycle;GO:0016572//histone phosphorylation;GO:0009755//hormone-mediated signaling pathway;GO:0009934//regulation of meristem structural organization	gi|350534814|ref|NP_001233905.1|/0/B2-type cyclin dependent kinase [Solanum lycopersicum]
Solyc04g078460	121.919	407.689	1.74154	4.66e-06	0.000253458	K13051|1|1e-161|567|gmx:100803038|beta-aspartyl-peptidase (threonine type) [EC:3.4.19.5]	GO:0005737//cytoplasm	GO:0004067//asparaginase activity	GO:0033345//asparagine catabolic process via L-aspartate;GO:0006516//glycoprotein catabolic process;GO:0051604//protein maturation	gi|460384861|ref|XP_004238125.1|/0/PREDICTED: probable isoaspartyl peptidase/L-asparaginase 2-like [Solanum lycopersicum]
Solyc09g009530	282.846	945.724	1.7414	8.86e-07	6.18e-05	-	GO:0005783//endoplasmic reticulum	GO:0016787//hydrolase activity	GO:0009805//coumarin biosynthetic process;GO:0009611//response to wounding;GO:0000041//transition metal ion transport;GO:0009963//positive regulation of flavonoid biosynthetic process	gi|460402074|ref|XP_004246539.1|/0/PREDICTED: uncharacterized protein LOC101261737 [Solanum lycopersicum]
Solyc09g091390	39.9658	133.518	1.74019	0.000206889	0.00589622	K01115|1|2e-20|95.9|vcn:VOLCADRAFT_99471|phospholipase D [EC:3.1.4.4]	-	-	GO:0010075//regulation of meristem growth	gi|460404704|ref|XP_004247821.1|/9.46066e-73/PREDICTED: uncharacterized protein LOC101254035 [Solanum lycopersicum]
Solyc10g050880	28.8557	96.347	1.73938	0.00098489	0.0199685	K13258|1|2e-54|210|gmx:547489|2-hydroxyisoflavanone dehydratase [EC:4.2.1.105];K14493|2|2e-27|121|aly:ARALYDRAFT_486805|gibberellin receptor GID1 [EC:3.-.-.-]	-	-	-	gi|460406573|ref|XP_004248737.1|/0/PREDICTED: probable carboxylesterase 13-like [Solanum lycopersicum]
Solyc03g112240	36.9356	123.123	1.73702	0.000318838	0.00829838	-	-	-	GO:0006661//phosphatidylinositol biosynthetic process	gi|460381612|ref|XP_004236542.1|/5.08191e-42/PREDICTED: MATE efflux family protein 7-like [Solanum lycopersicum]
Solyc12g011030	348.372	1161.23	1.73696	7.73e-07	5.53e-05	K08235|1|4e-91|332|vvi:100252173|xyloglucan:xyloglucosyl transferase [EC:2.4.1.207]	GO:0048046//apoplast;GO:0005618//cell wall	GO:0004553//hydrolase activity, hydrolyzing O-glycosyl compounds;GO:0016762//xyloglucan:xyloglucosyl transferase activity	GO:0006073//cellular glucan metabolic process	gi|350535953|ref|NP_001234478.1|/9.48232e-143/xyloglucan endotransglucosylase-hydrolase XTH9 precursor [Solanum lycopersicum]
Solyc01g107730	128.673	428.63	1.73602	3.3e-06	0.000188699	K14505|1|4e-123|439|vvi:100264093|cyclin D3, plant	GO:0005634//nucleus	-	GO:0007049//cell cycle	gi|350536333|ref|NP_001234753.1|/0/CycD3;2 protein [Solanum lycopersicum]
Solyc04g007250	50.1171	166.837	1.73507	9.15e-05	0.00300995	-	-	-	GO:1901700;GO:0050794//regulation of cellular process;GO:0051716//cellular response to stimulus;GO:0010033//response to organic substance	gi|460386494|ref|XP_004238933.1|/6.25459e-72/PREDICTED: uncharacterized protein LOC101255885 [Solanum lycopersicum]
Solyc12g005450	466.738	1553.5	1.73484	4.69e-07	3.63e-05	K13430|1|7e-44|176|zma:100283091|serine/threonine-protein kinase PBS1 [EC:2.7.11.1];K13429|5|7e-42|169|vvi:100255092|chitin elicitor receptor kinase 1	GO:0005634//nucleus	GO:0004672//protein kinase activity;GO:0000166//nucleotide binding	GO:0009753//response to jasmonic acid stimulus;GO:0009620//response to fungus;GO:0009611//response to wounding;GO:0009695//jasmonic acid biosynthetic process;GO:0016310//phosphorylation	gi|460412210|ref|XP_004251495.1|/0/PREDICTED: probable receptor-like protein kinase At1g33260-like [Solanum lycopersicum]
Solyc11g005090	43.6874	145.291	1.73366	0.000136947	0.00421103	K06627|1|0.0|641|rcu:RCOM_0562930|cyclin A	GO:0005634//nucleus	GO:0019901//protein kinase binding	GO:0007126//meiosis;GO:0000079//regulation of cyclin-dependent protein serine/threonine kinase activity;GO:0051301//cell division;GO:0022414//reproductive process	gi|350539787|ref|NP_001233762.1|/0/cyclin A1 [Solanum lycopersicum]
Solyc04g011390	530.95	1765.38	1.73333	3.48e-07	2.76e-05	K11254|1|2e-53|204|mtr:MTR_2g096100|histone H4	GO:0005829//cytosol;GO:0000786//nucleosome;GO:0005739//mitochondrion;GO:0005730//nucleolus;GO:0009506//plasmodesma;GO:0005774//vacuolar membrane;GO:0009579//thylakoid;GO:0009507//chloroplast;GO:0005794//Golgi apparatus;GO:0005886//plasma membrane	GO:0003677//DNA binding;GO:0046982//protein heterodimerization activity	GO:0009414//response to water deprivation;GO:0006334//nucleosome assembly	gi|350539093|ref|NP_001234118.1|/1.41921e-52/histone H4 [Solanum lycopersicum]
Solyc09g082620	49.2152	163.553	1.73258	8.44e-05	0.00284134	-	-	-	GO:0010052//guard cell differentiation	gi|460390855|ref|XP_004241040.1|/2.6589e-27/PREDICTED: EPIDERMAL PATTERNING FACTOR-like protein 4-like [Solanum lycopersicum]
Solyc07g048090	565.215	1873.85	1.72913	4.58e-07	3.55e-05	-	GO:0046658//anchored to plasma membrane	-	-	gi|460395937|ref|XP_004243536.1|/1.03454e-130/PREDICTED: fasciclin-like arabinogalactan protein 7-like [Solanum lycopersicum]
Solyc01g102330	508.398	1683.58	1.7275	5.44e-07	4.14e-05	-	-	-	-	gi|460369035|ref|XP_004230370.1|/2.26607e-154/PREDICTED: probable carbohydrate esterase At4g34215-like [Solanum lycopersicum]
Solyc09g083380	473.631	1567.3	1.72644	7.12e-07	5.17e-05	K11275|1|3e-46|182|bdi:100833820|histone H1/5	GO:0000786//nucleosome;GO:0005634//nucleus	GO:0003677//DNA binding	GO:0006334//nucleosome assembly	gi|460404357|ref|XP_004247649.1|/2.43218e-99/PREDICTED: uncharacterized protein LOC101245495 [Solanum lycopersicum]
Solyc08g081610	57.7708	190.886	1.7243	5.88e-05	0.00207209	K13426|1|2e-49|194|vvi:100251862|WRKY transcription factor 29;K13425|3|5e-45|179|pop:POPTR_755334|WRKY transcription factor 22	-	-	GO:0010200//response to chitin	gi|460400081|ref|XP_004245564.1|/1.79104e-177/PREDICTED: WRKY transcription factor 22-like [Solanum lycopersicum]
Solyc04g074760	23.2238	76.66	1.72287	0.00200666	0.0342691	-	GO:0005829//cytosol;GO:0016020//membrane	-	-	gi|460384505|ref|XP_004237951.1|/0/PREDICTED: uncharacterized protein LOC101266817 [Solanum lycopersicum]
Solyc11g066350	20.0895	66.3036	1.72265	0.00271701	0.04275	-	-	-	-	gi|460411153|ref|XP_004250979.1|/1.29436e-164/PREDICTED: uncharacterized protein LOC101261484 [Solanum lycopersicum]
Solyc12g088360	426.817	1408.49	1.72246	7.27e-07	5.26e-05	K08332|1|7e-23|105|vcn:VOLCADRAFT_41528|vacuolar protein 8	GO:0005737//cytoplasm	GO:0016874//ligase activity	GO:0009693//ethylene biosynthetic process	gi|460414776|ref|XP_004252739.1|/9.04486e-146/PREDICTED: U-box domain-containing protein 4-like [Solanum lycopersicum]
Solyc10g011730	151.736	499.682	1.71945	3.34e-06	0.000189863	-	GO:0016023//cytoplasmic membrane-bounded vesicle;GO:0031225//anchored to membrane;GO:0005886//plasma membrane	-	GO:0009684//indoleacetic acid biosynthetic process;GO:0006569//tryptophan catabolic process;GO:0009612//response to mechanical stimulus	gi|460405218|ref|XP_004248073.1|/7.23764e-33/PREDICTED: arabinogalactan peptide 20-like [Solanum lycopersicum]
Solyc09g009900	39.0094	128.292	1.71754	0.000272427	0.00735518	K10740|1|6e-37|150|vvi:100264936|replication factor A3	-	-	-	gi|460402010|ref|XP_004246508.1|/6.37571e-55/PREDICTED: uncharacterized protein LOC101252714 [Solanum lycopersicum]
Solyc01g088780	40.7636	133.973	1.71659	0.000224386	0.00626016	K04392|1|2e-93|339|smo:SELMODRAFT_229811|Ras-related C3 botulinum toxin substrate 1;K07975|2|7e-93|337|ath:AT2G44690|Rho family, other	GO:0030427//site of polarized growth;GO:0009524//phragmoplast;GO:0005730//nucleolus;GO:0005819//spindle;GO:0045177//apical part of cell;GO:0005886//plasma membrane	GO:0032794//GTPase activating protein binding;GO:0005525//GTP binding;GO:0004767//sphingomyelin phosphodiesterase activity;GO:0003924//GTPase activity	GO:0030834//regulation of actin filament depolymerization;GO:0000226//microtubule cytoskeleton organization;GO:0017157//regulation of exocytosis;GO:0010119//regulation of stomatal movement;GO:0051650//establishment of vesicle localization;GO:0045010//actin nucleation;GO:0009734//auxin mediated signaling pathway;GO:0015031//protein transport;GO:0006184//GTP catabolic process;GO:0010090//trichome m…	gi|460367733|ref|XP_004229725.1|/2.3671e-117/PREDICTED: rac-like GTP-binding protein 7-like [Solanum lycopersicum]
Solyc05g012810	87.1071	286.229	1.71631	1.77e-05	0.00076295	-	-	-	-	gi|460386820|ref|XP_004239094.1|/1.26572e-131/PREDICTED: uncharacterized protein LOC101255590 [Solanum lycopersicum]
Solyc07g024070	20.3546	66.793	1.71434	0.00304169	0.0465714	K13960|1|3e-96|351|vvi:100245756|ubiquitin-conjugating enzyme E2 T [EC:6.3.2.19]	-	GO:0016881//acid-amino acid ligase activity	-	gi|460395090|ref|XP_004243121.1|/0/PREDICTED: uncharacterized protein LOC101249380 [Solanum lycopersicum]
Solyc06g068910	62.9245	206.429	1.71395	5.69e-05	0.0020252	K10576|1|7e-81|300|vvi:100250088|ubiquitin-conjugating enzyme E2 H [EC:6.3.2.19];K00924|2|6e-64|243|ath:AT1G28440|[EC:2.7.1.-]	GO:0009506//plasmodesma;GO:0005774//vacuolar membrane;GO:0005886//plasma membrane	GO:0004674//protein serine/threonine kinase activity;GO:0016491//oxidoreductase activity;GO:0005524//ATP binding	GO:0006468//protein phosphorylation;GO:0010075//regulation of meristem growth;GO:0007169//transmembrane receptor protein tyrosine kinase signaling pathway	gi|460392081|ref|XP_004241646.1|/0/PREDICTED: probable inactive receptor kinase At1g48480-like [Solanum lycopersicum]
Solyc04g082830	88.0091	288.641	1.71355	2e-05	0.000843206	K07088|1|1e-120|431|pop:POPTR_853491|	GO:0016021//integral to membrane	GO:0009672//auxin:hydrogen symporter activity	GO:0009926//auxin polar transport;GO:0055085//transmembrane transport	gi|460385549|ref|XP_004238466.1|/0/PREDICTED: uncharacterized protein LOC101244867 [Solanum lycopersicum]
Solyc06g006090	27.7952	91.1219	1.71296	0.00100365	0.0202565	K15235|1|1e-10|63.2|aly:ARALYDRAFT_481877|josephin [EC:3.4.19.12]	-	-	-	gi|224139048|ref|XP_002322967.1|/7.66925e-14/predicted protein [Populus trichocarpa]
Solyc03g116890	604.755	1980.23	1.71125	5.77e-07	4.34e-05	K13424|1|7e-21|99.8|pop:POPTR_663578|WRKY transcription factor 33	-	GO:0043565//sequence-specific DNA binding;GO:0003700//sequence-specific DNA binding transcription factor activity	GO:0006952//defense response;GO:0006355//regulation of transcription, DNA-dependent	gi|460380393|ref|XP_004235941.1|/0/PREDICTED: probable WRKY transcription factor 40-like [Solanum lycopersicum]
Solyc05g010010	133.981	438.608	1.71091	6.33e-06	0.000321433	-	-	-	-	gi|460386582|ref|XP_004238977.1|/6.65222e-148/PREDICTED: uncharacterized protein LOC101243889 [Solanum lycopersicum]
Solyc07g049460	28.432	93.0751	1.71088	0.00108336	0.0215325	K00423|1|3e-60|231|aly:ARALYDRAFT_489021|L-ascorbate oxidase [EC:1.10.3.3]	GO:0048046//apoplast	GO:0005507//copper ion binding;GO:0052716//hydroquinone:oxygen oxidoreductase activity;GO:0008447//L-ascorbate oxidase activity	GO:0055114//oxidation-reduction process;GO:0015706//nitrate transport;GO:0010106//cellular response to iron ion starvation;GO:0010228//vegetative to reproductive phase transition of meristem;GO:0006826//iron ion transport;GO:0046688//response to copper ion;GO:0010167//response to nitrate;GO:0046274//lignin catabolic process	gi|350538127|ref|NP_001233816.1|/0/laccase precursor [Solanum lycopersicum]
Solyc10g079170	37.9465	124.063	1.70904	0.00032698	0.00845084	K08286|1|5e-114|410|ath:AT4G28490|protein-serine/threonine kinase [EC:2.7.11.-];K13415|3|2e-109|395|pop:POPTR_650846|protein brassinosteroid insensitive 1 [EC:2.7.10.1 2.7.11.1]	GO:0016021//integral to membrane;GO:0016023//cytoplasmic membrane-bounded vesicle;GO:0005886//plasma membrane	GO:0004674//protein serine/threonine kinase activity;GO:0004713//protein tyrosine kinase activity;GO:0005524//ATP binding	GO:0006468//protein phosphorylation;GO:0009741//response to brassinosteroid stimulus;GO:0007169//transmembrane receptor protein tyrosine kinase signaling pathway;GO:0009733//response to auxin stimulus	gi|460407524|ref|XP_004249202.1|/0/PREDICTED: leucine-rich repeat receptor-like tyrosine-protein kinase At2g41820-like [Solanum lycopersicum]
Solyc04g074740	22.3219	72.9115	1.70769	0.00203337	0.0345923	-	-	-	-	gi|460384501|ref|XP_004237949.1|/1.10487e-100/PREDICTED: blue copper protein-like [Solanum lycopersicum]
Solyc03g083480	4148.64	13548.8	1.70746	2.55e-07	2.1e-05	-	-	GO:0016772//transferase activity, transferring phosphorus-containing groups	-	gi|460378377|ref|XP_004234949.1|/0/PREDICTED: uncharacterized protein LOC101252760 [Solanum lycopersicum]
Solyc07g054170	32.6862	106.712	1.70697	0.000484174	0.0116712	-	GO:0009506//plasmodesma;GO:0005576//extracellular region	-	GO:0009828//plant-type cell wall loosening;GO:0009826//unidimensional cell growth;GO:0019953//sexual reproduction;GO:0006949//syncytium formation	gi|460395545|ref|XP_004243343.1|/4.68181e-160/PREDICTED: expansin-B3-like [Solanum lycopersicum]
Solyc04g083140	23.4914	76.6685	1.7065	0.00165548	0.0295208	K13267|1|1e-138|491|gmx:100814284|cytochrome P450, family 71, subfamily D, polypeptide 9 (flavonoid 6-hydroxylase) [EC:1.14.13.-];K16085|2|8e-127|452|osa:4335091|cytochrome P450, family 99, subfamily A, polypeptide 3 (9beta-pimara-7,15-diene oxidase) [EC:1.14.13.144];K16083|3|2e-119|427|osa:4329725|cytochrome P450, family 71, subfamily Z, polypeptide 6 (ent-isokaurene C2-hydroxylase) [EC:1.14.13.…	-	-	-	gi|460383307|ref|XP_004237369.1|/0/PREDICTED: premnaspirodiene oxygenase-like [Solanum lycopersicum]
Solyc02g083890	38.9574	126.918	1.70393	0.000273322	0.00735518	-	-	-	GO:0048453//sepal formation;GO:0048451//petal formation;GO:0008283//cell proliferation	gi|460373362|ref|XP_004232489.1|/0/PREDICTED: uncharacterized protein LOC101259500 [Solanum lycopersicum]
Solyc09g092520	1333.82	4345.28	1.70388	4.03e-07	3.15e-05	K08235|1|7e-131|464|gmx:100499905|xyloglucan:xyloglucosyl transferase [EC:2.4.1.207]	GO:0048046//apoplast;GO:0005618//cell wall	GO:0004553//hydrolase activity, hydrolyzing O-glycosyl compounds;GO:0016762//xyloglucan:xyloglucosyl transferase activity	GO:0006073//cellular glucan metabolic process	gi|460404859|ref|XP_004247897.1|/4.19964e-167/PREDICTED: brassinosteroid-regulated protein BRU1 [Solanum lycopersicum]
Solyc03g005980	34.4925	112.328	1.70337	0.000452664	0.0110923	K09874|1|3e-107|386|osa:4328814|aquaporin NIP	GO:0005886//plasma membrane;GO:0016021//integral to membrane;GO:0005783//endoplasmic reticulum	GO:0015129//lactate transmembrane transporter activity;GO:0015105//arsenite transmembrane transporter activity	GO:0015700//arsenite transport;GO:0035873//lactate transmembrane transport;GO:0080170//hydrogen peroxide transmembrane transport;GO:0046685//response to arsenic-containing substance;GO:0001666//response to hypoxia	gi|460376575|ref|XP_004234073.1|/5.7261e-156/PREDICTED: aquaporin NIP1-1-like [Solanum lycopersicum]
Solyc04g074990	47.9367	156.077	1.70305	0.000173905	0.00514095	-	-	GO:0003677//DNA binding	-	gi|460384545|ref|XP_004237971.1|/4.37722e-54/PREDICTED: ZF-HD homeobox protein At4g24660-like [Solanum lycopersicum]
Solyc08g083270	19.9309	64.8568	1.70225	0.00278912	0.043423	-	-	GO:0009055//electron carrier activity;GO:0015035//protein disulfide oxidoreductase activity	GO:0045454//cell redox homeostasis	gi|365222868|gb|AEW69786.1|/0/Hop-interacting protein THI143 [Solanum lycopersicum]
Solyc12g009770	202.431	657.759	1.70013	3.28e-06	0.000188663	K13420|1|2e-83|309|ath:AT5G46330|LRR receptor-like serine/threonine-protein kinase FLS2 [EC:2.7.11.1]	-	-	-	gi|460412693|ref|XP_004251732.1|/0/PREDICTED: receptor-like protein 12-like [Solanum lycopersicum]
Solyc08g067530	107.251	348.23	1.69905	1.09e-05	0.000505305	-	-	-	-	gi|460399765|ref|XP_004245407.1|/1.26409e-61/PREDICTED: non-specific lipid-transfer protein 2-like [Solanum lycopersicum]
Solyc04g025530	171.504	556.523	1.6982	3.96e-06	0.000220289	K01580|1|0.0|880|vvi:100266215|glutamate decarboxylase [EC:4.1.1.15]	GO:0005634//nucleus;GO:0005829//cytosol	GO:0030170//pyridoxal phosphate binding;GO:0004351//glutamate decarboxylase activity;GO:0016706//oxidoreductase activity, acting on paired donors, with incorporation or reduction of molecular oxygen, 2-oxoglutarate as one donor, and incorporation of one atom each of oxygen into both donors;GO:0016702//oxidoreductase activity, acting on single donors with incorporation of molecular oxygen, incorpo…	GO:0006536//glutamate metabolic process;GO:0046686//response to cadmium ion;GO:0055114//oxidation-reduction process	gi|460383060|ref|XP_004237250.1|/0/PREDICTED: glutamate decarboxylase 4-like [Solanum lycopersicum]
Solyc04g079760	613.786	1989.74	1.69677	7.43e-07	5.36e-05	-	-	-	-	gi|460385031|ref|XP_004238209.1|/3.42418e-162/PREDICTED: uncharacterized protein LOC101245158 isoform 1 [Solanum lycopersicum]
Solyc07g008140	247.399	801.715	1.69625	1.93e-06	0.000119578	K12418|1|2e-12|70.5|cre:CHLREDRAFT_32523|fatty acid desaturase (delta-4 desaturase) [EC:1.14.19.-];K01115|4|3e-12|70.1|vcn:VOLCADRAFT_99471|phospholipase D [EC:3.1.4.4]	-	-	-	gi|462398030|gb|EMJ03698.1|/2.93564e-51/hypothetical protein PRUPE_ppa010678mg [Prunus persica]
Solyc02g092250	58.6207	189.937	1.69604	7.97e-05	0.00269291	K13267|1|4e-139|493|gmx:100814284|cytochrome P450, family 71, subfamily D, polypeptide 9 (flavonoid 6-hydroxylase) [EC:1.14.13.-];K16085|2|1e-120|431|osa:4335091|cytochrome P450, family 99, subfamily A, polypeptide 3 (9beta-pimara-7,15-diene oxidase) [EC:1.14.13.144];K16083|3|5e-109|393|osa:4329725|cytochrome P450, family 71, subfamily Z, polypeptide 6 (ent-isokaurene C2-hydroxylase) [EC:1.14.13.…	-	GO:0016709//oxidoreductase activity, acting on paired donors, with incorporation or reduction of molecular oxygen, NAD(P)H as one donor, and incorporation of one atom of oxygen;GO:0046872//metal ion binding	-	gi|460372229|ref|XP_004231934.1|/0/PREDICTED: premnaspirodiene oxygenase-like [Solanum lycopersicum]
Solyc07g006560	342.475	1109.55	1.6959	1.35e-06	8.78e-05	-	-	-	-	gi|460394143|ref|XP_004242664.1|/4.9912e-85/PREDICTED: LOW QUALITY PROTEIN: ribonuclease MC-like [Solanum lycopersicum]
Solyc10g083860	85.727	277.281	1.69353	2.14e-05	0.000897775	K13496|1|1e-143|508|ath:AT2G36800|UDP-glucosyl transferase 73C [EC:2.4.1.-]	-	GO:0047213//anthocyanidin 3-O-glucosyltransferase activity	GO:0008152//metabolic process	gi|460408070|ref|XP_004249471.1|/0/PREDICTED: UDP-glycosyltransferase 73C3-like [Solanum lycopersicum]
Solyc01g006670	27.317	87.9823	1.68741	0.00131112	0.0248152	K13496|1|2e-56|218|ath:AT2G36780|UDP-glucosyl transferase 73C [EC:2.4.1.-]	-	GO:0008194//UDP-glycosyltransferase activity;GO:0016758//transferase activity, transferring hexosyl groups	-	gi|460365546|ref|XP_004228662.1|/0/PREDICTED: UDP-glycosyltransferase 92A1-like [Solanum lycopersicum]
Solyc12g036390	129.518	416.521	1.68523	8.62e-06	0.000415354	K02183|1|9e-93|338|mtr:MTR_4g128600|calmodulin	-	-	-	gi|460413722|ref|XP_004252230.1|/0/PREDICTED: uncharacterized protein LOC101256262 [Solanum lycopersicum]
Solyc07g062490	954.888	3070.03	1.68485	6.12e-07	4.56e-05	-	-	-	-	gi|460397440|ref|XP_004244275.1|/4.413e-173/PREDICTED: epidermis-specific secreted glycoprotein EP1-like [Solanum lycopersicum]
Solyc06g070970	22.8001	73.3027	1.68483	0.00226021	0.0372524	-	-	-	-	gi|460391932|ref|XP_004241572.1|/0/PREDICTED: uncharacterized protein LOC101251297 [Solanum lycopersicum]
Solyc12g019480	22.9587	73.8091	1.68476	0.00252013	0.0403675	K01115|1|8e-06|51.2|vcn:VOLCADRAFT_99471|phospholipase D [EC:3.1.4.4]	GO:0005886//plasma membrane	-	GO:0009987//cellular process;GO:0050896//response to stimulus;GO:0048507//meristem development	gi|460413231|ref|XP_004251998.1|/0/PREDICTED: uncharacterized protein LOC101268070 [Solanum lycopersicum]
Solyc02g093300	41.507	133.419	1.68454	0.000309425	0.00810088	K02320|1|0.0|2128|rcu:RCOM_1409950|DNA polymerase alpha subunit A [EC:2.7.7.7]	GO:0005658//alpha DNA polymerase:primase complex	GO:0003887//DNA-directed DNA polymerase activity;GO:0000166//nucleotide binding;GO:0051539//4 iron, 4 sulfur cluster binding;GO:0046872//metal ion binding;GO:0003677//DNA binding;GO:0001882//nucleoside binding;GO:0003896//DNA primase activity;GO:0008408//3'-5' exonuclease activity	GO:0006275//regulation of DNA replication;GO:0007155//cell adhesion;GO:0000911//cytokinesis by cell plate formation;GO:0051567//histone H3-K9 methylation;GO:0019985//translesion synthesis;GO:0009910//negative regulation of flower development;GO:0045010//actin nucleation;GO:0000731//DNA synthesis involved in DNA repair;GO:0000724//double-strand break repair via homologous recombination;GO:0006303/…	gi|380710181|gb|AFD98849.1|/0/DNA polymerase alpha catalytic subunit [Solanum lycopersicum]
Solyc03g026270	137.811	442.829	1.68405	6.75e-06	0.000338086	K09286|1|1e-59|227|ath:AT4G25480|EREBP-like factor	GO:0005634//nucleus	GO:0003700//sequence-specific DNA binding transcription factor activity;GO:0003677//DNA binding	GO:0006355//regulation of transcription, DNA-dependent	gi|45826358|gb|AAS77819.1|/1.02713e-117/CBF3 [Solanum lycopersicum]
Solyc03g117560	187.5	600.374	1.67897	4.45e-06	0.000244323	-	GO:0016023//cytoplasmic membrane-bounded vesicle	-	-	gi|460380300|ref|XP_004235895.1|/1.65277e-94/PREDICTED: lamin-like protein-like [Solanum lycopersicum]
Solyc08g066320	74.6169	238.877	1.67869	4.76e-05	0.00174387	K00924|1|4e-138|490|ath:AT5G25930|[EC:2.7.1.-]	GO:0005886//plasma membrane	GO:0016301//kinase activity	GO:0033036;GO:0043067//regulation of programmed cell death;GO:0048583;GO:0044710;GO:0002376//immune system process;GO:1901700;GO:0009725//response to hormone stimulus;GO:0006952//defense response;GO:0035556//intracellular signal transduction	gi|460399235|ref|XP_004245147.1|/0/PREDICTED: LRR receptor-like serine/threonine-protein kinase GSO2-like [Solanum lycopersicum]
Solyc09g060110	52.1364	166.871	1.67837	0.000147407	0.00448915	K13416|1|5e-75|281|rcu:RCOM_1534760|brassinosteroid insensitive 1-associated receptor kinase 1 [EC:2.7.10.1 2.7.11.1];K13417|4|6e-73|274|ath:AT2G13790|somatic embryogenesis receptor kinase 4 [EC:2.7.10.1 2.7.11.1]	GO:0005886//plasma membrane	GO:0004709//MAP kinase kinase kinase activity;GO:0005524//ATP binding	GO:0045492//xylan biosynthetic process;GO:0000186//activation of MAPKK activity;GO:0010413//glucuronoxylan metabolic process	gi|460403201|ref|XP_004247083.1|/0/PREDICTED: probable LRR receptor-like serine/threonine-protein kinase At5g48740-like [Solanum lycopersicum]
Solyc07g054280	70.5782	225.648	1.67678	5.57e-05	0.00198956	K01592|1|9e-174|608|pop:POPTR_571156|tyrosine decarboxylase [EC:4.1.1.25]	-	GO:0030170//pyridoxal phosphate binding;GO:0004058//aromatic-L-amino-acid decarboxylase activity	GO:0006520//cellular amino acid metabolic process	gi|460395527|ref|XP_004243334.1|/0/PREDICTED: aromatic-L-amino-acid decarboxylase-like [Solanum lycopersicum]
Solyc02g073580	722.675	2310.04	1.6765	9.71e-07	6.69e-05	K14431|1|3e-12|70.1|zma:542756|transcription factor TGA	GO:0005634//nucleus	-	-	gi|359483528|ref|XP_002266016.2|/1.23392e-66/PREDICTED: uncharacterized protein LOC100256671 [Vitis vinifera]
Solyc09g010160	22.8001	72.8474	1.67584	0.00241751	0.0390904	-	-	-	-	gi|460402763|ref|XP_004246880.1|/3.1278e-99/PREDICTED: NAC domain-containing protein 90-like [Solanum lycopersicum]
Solyc01g073890	353.156	1125.5	1.67219	1.85e-06	0.000115219	-	-	-	GO:1901698;GO:0006865//amino acid transport;GO:0044710;GO:1901700	gi|460366966|ref|XP_004229346.1|/0/PREDICTED: uncharacterized protein LOC101250152 [Solanum lycopersicum]
Solyc09g007660	44.9089	142.908	1.67001	0.000256514	0.00696195	-	GO:0031225//anchored to membrane;GO:0005886//plasma membrane	-	GO:0009834//secondary cell wall biogenesis	gi|460402331|ref|XP_004246666.1|/1.1744e-132/PREDICTED: fasciclin-like arabinogalactan protein 11-like [Solanum lycopersicum]
Solyc09g091510	192.815	613.47	1.66978	4.73e-06	0.000255098	K00660|1|0.0|716|pop:POPTR_814871|chalcone synthase [EC:2.3.1.74]	-	GO:0016210//naringenin-chalcone synthase activity	GO:0009813//flavonoid biosynthetic process	gi|5921769|sp|Q43163.1|CHSB_SOLTU/0/RecName: Full=Chalcone synthase 1B; AltName: Full=Naringenin-chalcone synthase 1B
Solyc01g014840	56.0141	178.189	1.66955	0.000154372	0.00464392	K13457|1|5e-18|92.4|vvi:100252764|disease resistance protein RPM1;K06685|3|6e-17|89.0|ath:AT4G19050|maintenance of ploidy protein MOB1 (MPS1 binder 1)	-	-	-	gi|460365849|ref|XP_004228809.1|/0/PREDICTED: TMV resistance protein N-like [Solanum lycopersicum]
Solyc06g076630	325.415	1033.88	1.66771	2.09e-06	0.000129053	K00430|1|5e-132|468|rcu:RCOM_1176840|peroxidase [EC:1.11.1.7]	GO:0005576//extracellular region	GO:0046872//metal ion binding;GO:0004601//peroxidase activity;GO:0020037//heme binding	GO:0006979//response to oxidative stress;GO:0006598//polyamine catabolic process;GO:0055114//oxidation-reduction process;GO:0015706//nitrate transport;GO:0009698//phenylpropanoid metabolic process;GO:0042398//cellular modified amino acid biosynthetic process;GO:0010167//response to nitrate	gi|460391152|ref|XP_004241187.1|/0/PREDICTED: peroxidase 47-like [Solanum lycopersicum]
Solyc02g080890	431.75	1364.89	1.66051	2.11e-06	0.000129926	K13424|1|2e-23|109|sbi:SORBI_09g023270|WRKY transcription factor 33	-	-	-	gi|460373783|ref|XP_004232693.1|/0/PREDICTED: WRKY transcription factor 6-like [Solanum lycopersicum]
Solyc01g104030	154.97	489.773	1.66012	1.04e-05	0.000484713	K05391|1|3e-20|99.0|osa:4341189|cyclic nucleotide gated channel, other eukaryote	GO:0016021//integral to membrane;GO:0009506//plasmodesma	GO:0030551//cyclic nucleotide binding;GO:0042802//identical protein binding;GO:0005242//inward rectifier potassium channel activity	GO:0055085//transmembrane transport;GO:0010264//myo-inositol hexakisphosphate biosynthetic process;GO:0006813//potassium ion transport;GO:0009737//response to abscisic acid stimulus;GO:0042391//regulation of membrane potential	gi|460369268|ref|XP_004230485.1|/0/PREDICTED: potassium channel AKT2/3-like [Solanum lycopersicum]
Solyc08g080780	119.95	378.883	1.65932	1.68e-05	0.000729818	K09291|1|4e-23|108|gmx:100811882|nucleoprotein TPR	-	-	-	gi|460400191|ref|XP_004245619.1|/0/PREDICTED: uncharacterized protein LOC101262335 [Solanum lycopersicum]
Solyc03g095600	41.9828	132.513	1.65827	0.000506978	0.0120682	K09291|1|8e-12|70.5|rcu:RCOM_1128370|nucleoprotein TPR;K06674|3|1e-11|69.7|osa:4325020|structural maintenance of chromosome 2;K10400|4|3e-11|68.6|vvi:100255624|kinesin family member 15	-	-	-	gi|460378933|ref|XP_004235221.1|/0/PREDICTED: uncharacterized protein LOC101253166 [Solanum lycopersicum]
Solyc06g011350	172.782	545.324	1.65816	5.82e-06	0.000301299	K09872|1|4e-139|491|pop:POPTR_735495|aquaporin PIP	GO:0005773//vacuole;GO:0005886//plasma membrane;GO:0016021//integral to membrane;GO:0009507//chloroplast	GO:0005215//transporter activity	GO:0009269//response to desiccation;GO:0006833//water transport;GO:0006970//response to osmotic stress;GO:0080170//hydrogen peroxide transmembrane transport;GO:0009737//response to abscisic acid stimulus	gi|350539001|ref|NP_001234625.1|/9.29722e-162/aquaporin [Solanum lycopersicum]
Solyc04g077310	25.1911	79.4681	1.65746	0.00217442	0.0361877	K13417|1|2e-31|135|ath:AT2G13790|somatic embryogenesis receptor kinase 4 [EC:2.7.10.1 2.7.11.1];K00924|3|6e-31|134|aly:ARALYDRAFT_489442|[EC:2.7.1.-];K04733|4|6e-31|134|smo:SELMODRAFT_33807|interleukin-1 receptor-associated kinase 4 [EC:2.7.11.1]	-	GO:0004672//protein kinase activity	GO:0016310//phosphorylation;GO:0007154//cell communication	gi|359493715|ref|XP_002280938.2|/1.03753e-170/PREDICTED: uncharacterized protein LOC100246941 [Vitis vinifera]
Solyc07g005090	814.356	2568.15	1.657	1.14e-06	7.63e-05	K01183|1|2e-129|460|vvi:100248333|chitinase [EC:3.2.1.14]	-	GO:0004553//hydrolase activity, hydrolyzing O-glycosyl compounds	GO:0071704	gi|460393931|ref|XP_004242561.1|/0/PREDICTED: acidic mammalian chitinase-like [Solanum lycopersicum]
Solyc09g074470	21.472	67.6906	1.6565	0.003081	0.0470286	-	GO:0031965//nuclear membrane;GO:0005774//vacuolar membrane	-	-	gi|460403976|ref|XP_004247461.1|/1.5219e-159/PREDICTED: uncharacterized protein LOC101259880 isoform 1 [Solanum lycopersicum]
Solyc06g074790	304.152	958.195	1.65553	3.13e-06	0.000182588	K11252|1|2e-66|248|vvi:100253462|histone H2B	GO:0000786//nucleosome;GO:0009506//plasmodesma;GO:0005634//nucleus	GO:0003677//DNA binding;GO:0046982//protein heterodimerization activity	GO:0006334//nucleosome assembly	gi|350536407|ref|NP_001233989.1|/8.51593e-74/histone H2B.1 [Solanum lycopersicum]
Solyc07g053950	122.023	384.078	1.65424	1.6e-05	0.000707435	-	GO:0009536//plastid	-	-	gi|225446368|ref|XP_002273678.1|/1.85959e-31/PREDICTED: uncharacterized protein LOC100243770 [Vitis vinifera]
Solyc01g079570	30.0276	94.5005	1.65403	0.00120604	0.0233234	K05349|1|0.0|1215|vvi:100252178|beta-glucosidase [EC:3.2.1.21]	GO:0005576//extracellular region;GO:0009505//plant-type cell wall	GO:0008422//beta-glucosidase activity	GO:0005975//carbohydrate metabolic process;GO:0046685//response to arsenic-containing substance	gi|371917282|dbj|BAL44717.1|/0/SlArf/Xyl2 [Solanum lycopersicum]
Solyc12g098760	28.8582	90.7904	1.65356	0.00144049	0.0266502	K01115|1|3e-42|168|vcn:VOLCADRAFT_99471|phospholipase D [EC:3.1.4.4]	-	-	-	gi|460415630|ref|XP_004253161.1|/2.32362e-95/PREDICTED: uncharacterized protein LOC101261503 [Solanum lycopersicum]
Solyc09g005730	139.08	437.255	1.65256	1.42e-05	0.000633736	-	GO:0009507//chloroplast	-	GO:0032502//developmental process	gi|460402486|ref|XP_004246743.1|/4.41174e-54/PREDICTED: uncharacterized protein LOC101246275 [Solanum lycopersicum]
Solyc02g084350	23.4914	73.8347	1.65217	0.00247692	0.0398311	-	GO:0005634//nucleus	GO:0003677//DNA binding;GO:0003700//sequence-specific DNA binding transcription factor activity	GO:0006355//regulation of transcription, DNA-dependent;GO:0009741//response to brassinosteroid stimulus;GO:0010200//response to chitin;GO:0010089//xylem development	gi|460373328|ref|XP_004232472.1|/0/PREDICTED: NAC domain-containing protein 7-like [Solanum lycopersicum]
Solyc06g084430	104.062	326.289	1.6487	2.22e-05	0.000925948	K11251|1|5e-37|126|vvi:100254490|histone H2A	GO:0000786//nucleosome;GO:0005730//nucleolus	GO:0003677//DNA binding;GO:0046982//protein heterodimerization activity	GO:0006334//nucleosome assembly	gi|460393448|ref|XP_004242321.1|/1.36375e-41/PREDICTED: histone H2AX-like, partial [Solanum lycopersicum]
Solyc05g010320	144.345	452.339	1.64788	1.15e-05	0.000524658	K01859|1|2e-82|303|vvi:100233078|chalcone isomerase [EC:5.5.1.6]	-	-	-	gi|460386617|ref|XP_004238994.1|/2.79652e-125/PREDICTED: chalcone--flavonone isomerase-like [Solanum lycopersicum]
Solyc05g051640	22.0567	69.0776	1.647	0.00295971	0.0455917	K00924|1|0.0|694|aly:ARALYDRAFT_476729|[EC:2.7.1.-];K08286|5|5e-169|593|ath:AT4G28490|protein-serine/threonine kinase [EC:2.7.11.-]	GO:0016021//integral to membrane;GO:0005886//plasma membrane	GO:0004674//protein serine/threonine kinase activity;GO:0016491//oxidoreductase activity;GO:0005524//ATP binding;GO:0005515//protein binding	GO:0009944//polarity specification of adaxial/abaxial axis;GO:0048519//negative regulation of biological process;GO:0006468//protein phosphorylation;GO:0010223//secondary shoot formation;GO:0010075//regulation of meristem growth;GO:0010014//meristem initiation;GO:0009887//organ morphogenesis;GO:0010051//xylem and phloem pattern formation;GO:0010089//xylem development;GO:0048439//flower morphogene…	gi|460389195|ref|XP_004240244.1|/0/PREDICTED: leucine-rich repeat receptor-like protein kinase TDR-like [Solanum lycopersicum]
Solyc03g007050	159.759	500.317	1.64694	8.68e-06	0.000417019	K00924|1|5e-148|523|ath:AT1G75820|[EC:2.7.1.-];K08286|5|5e-139|493|ath:AT4G28490|protein-serine/threonine kinase [EC:2.7.11.-]	GO:0016023//cytoplasmic membrane-bounded vesicle;GO:0016021//integral to membrane;GO:0005576//extracellular region	GO:0004721//phosphoprotein phosphatase activity;GO:0004713//protein tyrosine kinase activity;GO:0004674//protein serine/threonine kinase activity;GO:0005524//ATP binding	GO:0010103//stomatal complex morphogenesis;GO:0009827//plant-type cell wall modification;GO:0009740//gibberellic acid mediated signaling pathway;GO:0001708//cell fate specification;GO:0048507//meristem development;GO:0009965//leaf morphogenesis;GO:0006468//protein phosphorylation;GO:0009845//seed germination;GO:0009553//embryo sac development;GO:0009909//regulation of flower development;GO:000223…	gi|460376736|ref|XP_004234153.1|/0/PREDICTED: LRR receptor-like serine/threonine-protein kinase ERL1-like [Solanum lycopersicum]
Solyc06g061230	793.472	2483.54	1.64615	1.33e-06	8.74e-05	-	-	-	-	-
Solyc09g008860	42.3048	132.165	1.64344	0.000402979	0.0100636	K10576|1|7e-82|303|vvi:100250088|ubiquitin-conjugating enzyme E2 H [EC:6.3.2.19];K13415|2|4e-71|267|rcu:RCOM_0478150|protein brassinosteroid insensitive 1 [EC:2.7.10.1 2.7.11.1]	GO:0005886//plasma membrane;GO:0016021//integral to membrane	GO:0005524//ATP binding;GO:0004674//protein serine/threonine kinase activity	GO:0006468//protein phosphorylation;GO:0007169//transmembrane receptor protein tyrosine kinase signaling pathway	gi|460402148|ref|XP_004246576.1|/0/PREDICTED: probable leucine-rich repeat receptor-like protein kinase At1g68400-like [Solanum lycopersicum]
Solyc09g097810	37.7879	118.009	1.6429	0.000551587	0.0128397	-	-	-	-	gi|460405131|ref|XP_004248030.1|/5.2763e-47/PREDICTED: uncharacterized protein LOC101245099 [Solanum lycopersicum]
Solyc06g062420	34.9707	109.056	1.64086	0.000762322	0.0164633	-	-	-	-	gi|224073748|ref|XP_002304154.1|/2.60813e-06/predicted protein [Populus trichocarpa]
Solyc01g088300	126.33	393.936	1.64077	1.61e-05	0.000707477	-	-	-	-	gi|460367661|ref|XP_004229689.1|/3.86575e-127/PREDICTED: germin-like protein subfamily 1 member 15-like [Solanum lycopersicum]
Solyc01g087740	29.1233	90.7648	1.63996	0.00168051	0.0298472	-	-	GO:0042802//identical protein binding;GO:0004252//serine-type endopeptidase activity	GO:0043086//negative regulation of catalytic activity;GO:0006508//proteolysis	gi|460367601|ref|XP_004229661.1|/0/PREDICTED: subtilisin-like protease-like [Solanum lycopersicum]
Solyc03g113720	276.47	861.013	1.63891	3.56e-06	0.000200187	K14492|1|6e-64|241|rcu:RCOM_1512800|two-component response regulator ARR-A family	GO:0005737//cytoplasm;GO:0005634//nucleus	GO:0000156//phosphorelay response regulator activity;GO:0005515//protein binding;GO:0016301//kinase activity	GO:0000160//two-component signal transduction system (phosphorelay);GO:0035556//intracellular signal transduction;GO:0006355//regulation of transcription, DNA-dependent;GO:0007623//circadian rhythm;GO:0016310//phosphorylation;GO:0009736//cytokinin mediated signaling pathway	gi|460380828|ref|XP_004236156.1|/6.87245e-105/PREDICTED: two-component response regulator ARR6-like [Solanum lycopersicum]
Solyc10g049790	25.6693	79.9063	1.63826	0.0023886	0.0387925	-	-	-	-	gi|460406629|ref|XP_004248764.1|/8.98213e-127/PREDICTED: uncharacterized protein LOC101255740 [Solanum lycopersicum]
Solyc04g016330	51.3931	159.851	1.63708	0.000218743	0.00617504	K00006|1|1e-13|76.3|bdi:100833474|glycerol-3-phosphate dehydrogenase (NAD+) [EC:1.1.1.8]	GO:0005829//cytosol;GO:0009331//glycerol-3-phosphate dehydrogenase complex	GO:0051287//NAD binding;GO:0047952//glycerol-3-phosphate dehydrogenase [NAD(P)+] activity;GO:0004367//glycerol-3-phosphate dehydrogenase [NAD+] activity	GO:0005975//carbohydrate metabolic process;GO:0046168//glycerol-3-phosphate catabolic process;GO:0055114//oxidation-reduction process	gi|460381710|ref|XP_004236586.1|/0/PREDICTED: probable glycerol-3-phosphate dehydrogenase [NAD(+)] 1, cytosolic-like [Solanum lycopersicum]
Solyc12g095750	38.6898	120.306	1.63668	0.000644963	0.0144635	K07088|1|3e-110|396|pop:POPTR_853491|	-	GO:0009672//auxin:hydrogen symporter activity	GO:0009926//auxin polar transport	gi|460415536|ref|XP_004253114.1|/0/PREDICTED: uncharacterized transporter YBR287W-like [Solanum lycopersicum]
Solyc06g068270	80.6229	250.671	1.63653	5.86e-05	0.0020699	K05278|1|4e-51|200|rcu:RCOM_1031440|flavonol synthase [EC:1.14.11.23]	-	GO:0016706//oxidoreductase activity, acting on paired donors, with incorporation or reduction of molecular oxygen, 2-oxoglutarate as one donor, and incorporation of one atom each of oxygen into both donors	GO:0055114//oxidation-reduction process	gi|460392168|ref|XP_004241689.1|/0/PREDICTED: protein SRG1-like [Solanum lycopersicum]
Solyc07g048050	84.6616	263.206	1.63641	5.22e-05	0.00188279	-	GO:0005576//extracellular region;GO:0016021//integral to membrane	GO:0004497//monooxygenase activity	-	gi|460395943|ref|XP_004243539.1|/0/PREDICTED: uncharacterized protein LOC101250033 [Solanum lycopersicum]
Solyc11g007890	35.3969	109.997	1.63577	0.00067791	0.0150907	K06892|1|7e-70|262|pop:POPTR_550478|;K05277|3|3e-53|207|pop:POPTR_646527|leucoanthocyanidin dioxygenase [EC:1.14.11.19]	GO:0005737//cytoplasm	GO:0045431//flavonol synthase activity;GO:0005506//iron ion binding;GO:0016702//oxidoreductase activity, acting on single donors with incorporation of molecular oxygen, incorporation of two atoms of oxygen	GO:0051555//flavonol biosynthetic process;GO:0055114//oxidation-reduction process	gi|460409188|ref|XP_004250021.1|/0/PREDICTED: probable 2-oxoglutarate/Fe(II)-dependent dioxygenase-like [Solanum lycopersicum]
Solyc01g073640	14720.4	45712.9	1.63478	8.93e-07	6.21e-05	K13070|1|3e-63|239|osa:4335093|momilactone-A synthase [EC:1.1.1.295];K09841|2|3e-56|216|bdi:100827045|xanthoxin dehydrogenase [EC:1.1.1.288]	GO:0005737//cytoplasm	GO:0016491//oxidoreductase activity;GO:0005488//binding	GO:0008152//metabolic process	gi|350538977|ref|NP_001233856.1|/2.5522e-139/yfe37 protein [Solanum lycopersicum]
Solyc02g093250	201.422	625.337	1.63441	7.56e-06	0.000372146	K00588|1|2e-130|462|vvi:100243978|caffeoyl-CoA O-methyltransferase [EC:2.1.1.104]	-	GO:0008171//O-methyltransferase activity	GO:0032259//methylation	gi|460372069|ref|XP_004231856.1|/3.27122e-138/PREDICTED: caffeoyl-CoA O-methyltransferase-like [Solanum lycopersicum]
Solyc11g006650	24.7129	76.613	1.63232	0.00273169	0.0428136	K03695|1|1e-17|90.5|bdi:100825913|ATP-dependent Clp protease ATP-binding subunit ClpB	-	-	-	gi|460410098|ref|XP_004250468.1|/0/PREDICTED: uncharacterized protein LOC101244337 [Solanum lycopersicum]
Solyc09g090680	39.0094	120.813	1.63088	0.000608915	0.0138794	-	GO:0005576//extracellular region;GO:0009506//plasmodesma	-	GO:0010497//plasmodesmata-mediated intercellular transport;GO:0046739//spread of virus in multicellular host	gi|460404602|ref|XP_004247770.1|/0/PREDICTED: cysteine-rich repeat secretory protein 3-like [Solanum lycopersicum]
Solyc02g085830	141.791	439.119	1.63085	1.76e-05	0.000760381	K03453|1|1e-10|64.3|vcn:VOLCADRAFT_102664|bile acid:Na+ symporter, BASS family	-	-	-	gi|460373115|ref|XP_004232368.1|/4.46416e-116/PREDICTED: IST1-like protein-like [Solanum lycopersicum]
Solyc07g007260	1795.63	5542.21	1.62597	1.41e-06	9.12e-05	-	-	-	-	gi|460394248|ref|XP_004242716.1|/4.11953e-44/PREDICTED: metallocarboxypeptidase inhibitor-like [Solanum lycopersicum]
Solyc06g005780	33.3751	102.934	1.62487	0.0011867	0.0229894	-	-	-	-	gi|460389964|ref|XP_004240614.1|/3.9522e-31/PREDICTED: non-specific lipid-transfer protein 2-like [Solanum lycopersicum]
Solyc09g065430	80.7815	249.054	1.62436	7.05e-05	0.0024418	K02605|1|8e-06|48.1|smo:SELMODRAFT_427211|origin recognition complex subunit 3	-	-	-	gi|460403412|ref|XP_004247185.1|/1.745e-99/PREDICTED: non-specific lipid-transfer protein-like protein At2g13820-like [Solanum lycopersicum]
Solyc02g090560	52.3471	161.281	1.62339	0.000307139	0.00806004	K01537|1|9e-77|286|aly:ARALYDRAFT_898774|Ca2+-transporting ATPase [EC:3.6.3.8]	-	-	-	gi|460375690|ref|XP_004233637.1|/0/PREDICTED: calcium-transporting ATPase 12, plasma membrane-type-like [Solanum lycopersicum]
Solyc09g092260	508.931	1566.19	1.62172	2.43e-06	0.000145508	K09510|1|1e-12|70.9|ota:Ot12g00420|DnaJ homolog subfamily B member 4;K09517|2|1e-12|70.5|rcu:RCOM_1347490|DnaJ homolog subfamily B member 11;K03686|5|2e-12|70.1|cre:CHLREDRAFT_55286|molecular chaperone DnaJ	GO:0009507//chloroplast;GO:0005634//nucleus	-	GO:0015996//chlorophyll catabolic process;GO:0006457//protein folding	gi|460404818|ref|XP_004247877.1|/1.16432e-99/PREDICTED: chaperone protein dnaJ 20, chloroplastic-like isoform 2 [Solanum lycopersicum]
Solyc05g009500	197.597	608.003	1.62152	8.96e-06	0.000428931	K14638|1|8e-143|505|smo:SELMODRAFT_135522|solute carrier family 15 (peptide/histidine transporter), member 3/4	GO:0005886//plasma membrane	GO:0005215//transporter activity	GO:0006857//oligopeptide transport	gi|460386504|ref|XP_004238938.1|/0/PREDICTED: probable nitrite transporter At1g68570-like [Solanum lycopersicum]
Solyc12g009650	31765.1	97722.1	1.62124	1.11e-06	7.46e-05	K14709|1|6e-24|109|vcn:VOLCADRAFT_104214|solute carrier family 39 (zinc transporter), member 1/2/3	GO:0009506//plasmodesma;GO:0048046//apoplast;GO:0009535//chloroplast thylakoid membrane	-	-	gi|460412689|ref|XP_004251730.1|/3.46211e-155/PREDICTED: uncharacterized protein LOC101261588 [Solanum lycopersicum]
Solyc12g057160	441.857	1357.99	1.61982	3.05e-06	0.000178543	K10839|1|5e-11|64.3|cre:CHLREDRAFT_80907|UV excision repair protein RAD23;K12447|2|8e-09|57.0|cre:CHLREDRAFT_32796|UDP-sugar pyrophosphorylase [EC:2.7.7.64]	-	-	GO:0050896//response to stimulus	gi|460414330|ref|XP_004252525.1|/1.32319e-66/PREDICTED: uncharacterized protein LOC101246031 [Solanum lycopersicum]
Solyc01g108240	244.577	749.822	1.61626	6.88e-06	0.000343439	K09286|1|8e-27|119|ath:AT3G14230|EREBP-like factor	-	-	GO:0006952//defense response;GO:0044249//cellular biosynthetic process;GO:1901576	gi|460369893|ref|XP_004230791.1|/1.55153e-170/PREDICTED: ethylene-responsive transcription factor ERF109-like [Solanum lycopersicum]
Solyc01g087500	34.6511	106.197	1.61577	0.00106078	0.0211784	K03164|1|0.0|2112|vvi:100253371|DNA topoisomerase II [EC:5.99.1.3]	GO:0009330//DNA topoisomerase complex (ATP-hydrolyzing);GO:0000795//synaptonemal complex;GO:0009507//chloroplast	GO:0005524//ATP binding;GO:0003918//DNA topoisomerase (ATP-hydrolyzing) activity	GO:0000911//cytokinesis by cell plate formation;GO:0006306//DNA methylation;GO:0000712//resolution of meiotic recombination intermediates;GO:0000819//sister chromatid segregation;GO:0006312//mitotic recombination;GO:0051726//regulation of cell cycle;GO:0006200//ATP catabolic process;GO:0044774//mitotic DNA integrity checkpoint;GO:0016572//histone phosphorylation;GO:0006342//chromatin silencing;GO…	gi|460367566|ref|XP_004229644.1|/0/PREDICTED: DNA topoisomerase 2-like [Solanum lycopersicum]
Solyc04g005050	3321.17	10156.6	1.61265	1.28e-06	8.51e-05	K07761|1|1e-110|397|ath:AT1G59970|gelatinase A [EC:3.4.24.24]	GO:0031225//anchored to membrane;GO:0005576//extracellular region	GO:0046872//metal ion binding;GO:0004222//metalloendopeptidase activity	GO:0030968//endoplasmic reticulum unfolded protein response;GO:0009693//ethylene biosynthetic process;GO:0010200//response to chitin;GO:0006508//proteolysis	gi|395627593|emb|CCH68442.1|/0/matrix metalloproteinase precursor [Solanum lycopersicum]
Solyc04g078470	91.1483	278.672	1.61228	4.58e-05	0.00169815	K14505|1|3e-91|333|vvi:100267897|cyclin D3, plant	GO:0005634//nucleus	-	GO:0010033//response to organic substance	gi|350536431|ref|NP_001234758.1|/0/CycD3;3 protein [Solanum lycopersicum]
Solyc04g077490	36.777	112.32	1.61074	0.000908554	0.018781	K09285|1|0.0|778|vvi:100252316|AP2-like factor, ANT lineage	-	-	GO:0044699;GO:0050794//regulation of cellular process;GO:0006351//transcription, DNA-dependent	gi|460384738|ref|XP_004238066.1|/0/PREDICTED: AP2-like ethylene-responsive transcription factor ANT-like [Solanum lycopersicum]
Solyc09g014990	1858.84	5674.13	1.61	1.6e-06	0.000101768	K13424|1|2e-152|537|rcu:RCOM_0849600|WRKY transcription factor 33	-	-	-	gi|460401603|ref|XP_004246308.1|/0/PREDICTED: probable WRKY transcription factor 33-like [Solanum lycopersicum]
Solyc02g081770	29.7625	90.752	1.60843	0.00165387	0.0295208	K15400|1|3e-15|81.3|ath:AT5G41040|omega-hydroxypalmitate O-feruloyl transferase [EC:2.3.1.188];K13065|2|6e-15|80.5|pop:POPTR_784746|shikimate O-hydroxycinnamoyltransferase [EC:2.3.1.133]	-	-	-	gi|460375958|ref|XP_004233769.1|/0/PREDICTED: salutaridinol 7-O-acetyltransferase-like [Solanum lycopersicum]
Solyc09g064750	44.5893	135.828	1.60701	0.000515439	0.0122388	-	-	-	-	gi|460385867|ref|XP_004238622.1|/2.17328e-42/PREDICTED: uncharacterized protein LOC101249819 [Solanum lycopersicum]
Solyc02g089620	547.19	1665.88	1.60617	3.15e-06	0.000183129	K00318|1|2e-166|583|vvi:100254983|proline dehydrogenase [EC:1.5.99.8]	GO:0005739//mitochondrion	GO:0004657//proline dehydrogenase activity	GO:0006537//glutamate biosynthetic process;GO:0006979//response to oxidative stress;GO:0006562//proline catabolic process;GO:0055114//oxidation-reduction process	gi|460372587|ref|XP_004232110.1|/0/PREDICTED: proline dehydrogenase 2, mitochondrial [Solanum lycopersicum]
Solyc01g007020	310.799	945.937	1.60576	5.3e-06	0.000277552	-	GO:0000151//ubiquitin ligase complex	GO:0004842//ubiquitin-protein ligase activity	GO:0016567//protein ubiquitination	gi|460365602|ref|XP_004228690.1|/0/PREDICTED: E3 ubiquitin-protein ligase PUB23-like [Solanum lycopersicum]
Solyc10g061970	37.2552	113.281	1.6044	0.000933908	0.0192157	K02921|1|7e-49|189|vvi:100254103|large subunit ribosomal protein L37Ae	GO:0022625//cytosolic large ribosomal subunit;GO:0005739//mitochondrion	GO:0046872//metal ion binding;GO:0003735//structural constituent of ribosome	GO:0006412//translation	gi|462405499|gb|EMJ10963.1|/1.05285e-47/hypothetical protein PRUPE_ppa013350mg [Prunus persica]
Solyc05g007950	44.8568	136.381	1.60425	0.000429437	0.0106168	K01166|1|5e-102|368|rcu:RCOM_0836480|ribonuclease T2 [EC:3.1.27.1]	GO:0005618//cell wall;GO:0005615//extracellular space;GO:0005886//plasma membrane	GO:0003723//RNA binding;GO:0033897//ribonuclease T2 activity	GO:0090305//nucleic acid phosphodiester bond hydrolysis;GO:0009651//response to salt stress;GO:0009718//anthocyanin-containing compound biosynthetic process;GO:0009611//response to wounding;GO:0007568//aging;GO:0016036//cellular response to phosphate starvation	gi|350535451|ref|NP_001234195.1|/1.01372e-138/extracellular ribonuclease LE precursor [Solanum lycopersicum]
Solyc03g116200	359.787	1093.08	1.60318	6.28e-06	0.000319865	-	-	-	-	gi|359270128|dbj|BAL27684.1|/2.38881e-23/lectin [Solanum lycopersicum]
Solyc03g082530	650.095	1973.86	1.6023	2.4e-06	0.000144483	K14488|1|1e-35|145|gmx:100526867|SAUR family protein	-	-	-	gi|460378499|ref|XP_004235008.1|/2.11356e-72/PREDICTED: indole-3-acetic acid-induced protein ARG7-like [Solanum lycopersicum]
Solyc02g090360	1316.12	3995.86	1.60221	1.79e-06	0.000112178	K00423|1|4e-171|599|ath:AT1G55570|L-ascorbate oxidase [EC:1.10.3.3]	GO:0005576//extracellular region;GO:0009505//plant-type cell wall	GO:0005507//copper ion binding;GO:0008447//L-ascorbate oxidase activity	GO:0080167//response to karrikin;GO:0055114//oxidation-reduction process	gi|460372481|ref|XP_004232058.1|/0/PREDICTED: L-ascorbate oxidase homolog [Solanum lycopersicum]
Solyc02g093040	58.3011	176.854	1.60096	0.000235552	0.0064805	K01376|1|5e-125|445|aly:ARALYDRAFT_473866|[EC:3.4.22.-];K01365|4|3e-112|403|smo:SELMODRAFT_428615|cathepsin L [EC:3.4.22.15]	-	GO:0016491//oxidoreductase activity;GO:0008233//peptidase activity	GO:0008152//metabolic process	gi|460372104|ref|XP_004231872.1|/0/PREDICTED: cysteine proteinase RD21a-like [Solanum lycopersicum]
Solyc04g005060	46.3459	140.559	1.60067	0.000359044	0.00909947	-	-	-	-	gi|460383013|ref|XP_004237230.1|/0/PREDICTED: uncharacterized protein LOC101245640 [Solanum lycopersicum]
Solyc03g111820	282.315	853.696	1.59641	6.36e-06	0.000321824	-	-	-	-	gi|460381107|ref|XP_004236294.1|/0/PREDICTED: uncharacterized protein LOC101251765 [Solanum lycopersicum]
Solyc12g044840	25.5107	77.128	1.59615	0.00296267	0.0455917	K04733|1|5e-83|307|smo:SELMODRAFT_159261|interleukin-1 receptor-associated kinase 4 [EC:2.7.11.1];K13430|4|5e-67|254|vvi:100254113|serine/threonine-protein kinase PBS1 [EC:2.7.11.1]	GO:0005886//plasma membrane	GO:0004713//protein tyrosine kinase activity;GO:0005524//ATP binding;GO:0004674//protein serine/threonine kinase activity	GO:0046777//protein autophosphorylation	gi|460414023|ref|XP_004252374.1|/0/PREDICTED: uncharacterized protein LOC101252561 [Solanum lycopersicum]
Solyc02g078500	80.1944	242.45	1.59612	0.000118723	0.00374932	-	GO:0005634//nucleus;GO:0005829//cytosol;GO:0005886//plasma membrane	-	-	gi|460374101|ref|XP_004232850.1|/8.49782e-148/PREDICTED: stem-specific protein TSJT1-like [Solanum lycopersicum]
Solyc02g064830	136.211	411.527	1.59514	2.93e-05	0.00115428	K14487|1|0.0|993|rcu:RCOM_1154750|auxin responsive GH3 gene family	GO:0016023//cytoplasmic membrane-bounded vesicle;GO:0009536//plastid	GO:0010279//indole-3-acetic acid amido synthetase activity	GO:0032940//secretion by cell;GO:0009733//response to auxin stimulus;GO:0009416//response to light stimulus	gi|460375303|ref|XP_004233446.1|/0/PREDICTED: probable indole-3-acetic acid-amido synthetase GH3.1-like [Solanum lycopersicum]
Solyc09g092750	78.0733	235.464	1.5926	9.3e-05	0.00304601	-	-	-	-	gi|270313172|gb|ACZ73653.1|/6.35083e-08/glycine-rich protein precursor [Nicotiana tabacum]
Solyc02g079990	33.5881	101.087	1.58957	0.0014675	0.0270823	K04733|1|6e-64|243|smo:SELMODRAFT_159261|interleukin-1 receptor-associated kinase 4 [EC:2.7.11.1];K13430|3|2e-61|235|pop:POPTR_548061|serine/threonine-protein kinase PBS1 [EC:2.7.11.1]	GO:0044464//cell part	GO:0004672//protein kinase activity;GO:0000166//nucleotide binding	-	gi|460373904|ref|XP_004232752.1|/0/PREDICTED: cysteine-rich receptor-like protein kinase 29-like [Solanum lycopersicum]
Solyc04g040130	347.053	1043.05	1.58758	4.84e-06	0.000258546	K10256|1|2e-151|533|rcu:RCOM_0503360|omega-6 fatty acid desaturase (delta-12 desaturase) [EC:1.14.19.-]	-	GO:0016717//oxidoreductase activity, acting on paired donors, with oxidation of a pair of donors resulting in the reduction of molecular oxygen to two molecules of water	GO:0006629//lipid metabolic process;GO:0055114//oxidation-reduction process	gi|460383233|ref|XP_004237335.1|/0/PREDICTED: omega-6 fatty acid desaturase, endoplasmic reticulum isozyme 2-like [Solanum lycopersicum]
Solyc06g076220	380.634	1142.79	1.58609	5.4e-06	0.000281094	-	GO:0005576//extracellular region;GO:0016020//membrane;GO:0009505//plant-type cell wall	-	GO:0009664//plant-type cell wall organization;GO:0006949//syncytium formation	gi|350539703|ref|NP_001234761.1|/1.03886e-156/expansin18 precursor [Solanum lycopersicum]
Solyc03g093360	101.778	305.567	1.58607	4.67e-05	0.00172614	-	GO:0016020//membrane;GO:0009579//thylakoid;GO:0009507//chloroplast	-	-	gi|460378836|ref|XP_004235174.1|/8.04718e-104/PREDICTED: uncharacterized protein LOC101263984 [Solanum lycopersicum]
Solyc01g087570	359.541	1077.5	1.58346	5.15e-06	0.00027201	-	-	-	GO:0009725//response to hormone stimulus;GO:0006950//response to stress;GO:0007165//signal transduction;GO:1901700;GO:0071310//cellular response to organic substance	gi|255553502|ref|XP_002517792.1|/2.02368e-14/conserved hypothetical protein [Ricinus communis]
Solyc03g118510	326.104	975.679	1.58107	7.16e-06	0.000353478	K10576|1|3e-81|301|vvi:100250088|ubiquitin-conjugating enzyme E2 H [EC:6.3.2.19];K13416|2|2e-64|245|aly:ARALYDRAFT_491347|brassinosteroid insensitive 1-associated receptor kinase 1 [EC:2.7.10.1 2.7.11.1];K13415|5|3e-62|238|aly:ARALYDRAFT_912402|protein brassinosteroid insensitive 1 [EC:2.7.10.1 2.7.11.1]	GO:0016021//integral to membrane;GO:0009506//plasmodesma;GO:0005774//vacuolar membrane;GO:0005886//plasma membrane	GO:0004674//protein serine/threonine kinase activity;GO:0016491//oxidoreductase activity;GO:0005524//ATP binding	GO:0006468//protein phosphorylation;GO:0010075//regulation of meristem growth;GO:0007169//transmembrane receptor protein tyrosine kinase signaling pathway	gi|460380044|ref|XP_004235768.1|/0/PREDICTED: probable inactive receptor kinase At1g48480-like [Solanum lycopersicum]
Solyc02g090720	73.445	219.594	1.5801	0.000181423	0.00531647	-	-	-	-	gi|460372439|ref|XP_004232038.1|/5.12609e-85/PREDICTED: uncharacterized protein LOC101245602 [Solanum lycopersicum]
Solyc01g098400	73.4474	219.589	1.58002	0.000150398	0.00456768	K14490|1|5e-63|237|rcu:RCOM_1429810|histidine-containing phosphotransfer peotein	-	GO:0032440//2-alkenal reductase [NAD(P)] activity;GO:0004871//signal transducer activity	GO:0055114//oxidation-reduction process;GO:0000160//two-component signal transduction system (phosphorelay)	gi|460368603|ref|XP_004230155.1|/1.15856e-78/PREDICTED: histidine-containing phosphotransfer protein 1-like [Solanum lycopersicum]
Solyc07g042490	76.7973	229.358	1.57848	0.000118051	0.00373339	K14488|1|5e-09|57.8|gmx:100527760|SAUR family protein	GO:0005739//mitochondrion	GO:0005516//calmodulin binding	GO:0009734//auxin mediated signaling pathway	gi|460396233|ref|XP_004243682.1|/3.38969e-70/PREDICTED: uncharacterized protein LOC101268293 [Solanum lycopersicum]
Solyc02g070780	110.703	330.526	1.57808	5.27e-05	0.00189852	K02541|1|0.0|1119|vvi:100253704|minichromosome maintenance protein 3	GO:0042555//MCM complex;GO:0005634//nucleus	GO:0003678//DNA helicase activity;GO:0003677//DNA binding;GO:0005524//ATP binding	GO:0032508//DNA duplex unwinding;GO:0007049//cell cycle;GO:0006270//DNA replication initiation	gi|460374616|ref|XP_004233106.1|/0/PREDICTED: DNA replication licensing factor MCM3 homolog 1-like [Solanum lycopersicum]
Solyc03g120170	105.923	315.847	1.57621	4.8e-05	0.00175535	-	-	-	-	gi|460381339|ref|XP_004236408.1|/6.7972e-63/PREDICTED: uncharacterized protein LOC101262708 [Solanum lycopersicum]
Solyc03g113090	97.3105	289.654	1.57366	7.33e-05	0.00251564	-	GO:0005886//plasma membrane	-	-	gi|460381584|ref|XP_004236528.1|/0/PREDICTED: uncharacterized protein LOC101252677 [Solanum lycopersicum]
Solyc02g067660	698.661	2069.45	1.56658	4.27e-06	0.000236399	-	-	-	-	gi|460375082|ref|XP_004233337.1|/0/PREDICTED: uncharacterized protein LOC101260601 [Solanum lycopersicum]
Solyc11g069940	206.15	610.208	1.56561	1.94e-05	0.000823204	K03676|1|6e-11|64.3|vvi:100244121|glutaredoxin 3	GO:0005737//cytoplasm	GO:0009055//electron carrier activity;GO:0015035//protein disulfide oxidoreductase activity	GO:0045454//cell redox homeostasis;GO:0048653//anther development	gi|460411597|ref|XP_004251195.1|/4.51554e-75/PREDICTED: glutaredoxin-C6-like [Solanum lycopersicum]
Solyc03g121100	31.6753	93.5474	1.56234	0.00206551	0.0349596	K02866|1|6e-23|105|osa:4332737|large subunit ribosomal protein L10e	-	GO:0016787//hydrolase activity	-	gi|460379777|ref|XP_004235637.1|/6.95166e-150/PREDICTED: acid phosphatase 1-like [Solanum lycopersicum]
Solyc01g087580	986.078	2908.75	1.56063	3.8e-06	0.000212231	-	-	-	GO:0009725//response to hormone stimulus;GO:0006950//response to stress;GO:0007165//signal transduction;GO:1901700;GO:0071310//cellular response to organic substance	gi|224138054|ref|XP_002322718.1|/3.77258e-13/predicted protein [Populus trichocarpa]
Solyc11g011000	27.7432	81.8296	1.56049	0.00287563	0.0445824	-	GO:0009506//plasmodesma;GO:0005576//extracellular region	-	-	gi|460409487|ref|XP_004250170.1|/1.08143e-165/PREDICTED: cysteine-rich repeat secretory protein 60-like [Solanum lycopersicum]
Solyc11g072580	44.4827	131.148	1.55987	0.000817433	0.0174163	K14638|1|4e-82|303|ppp:PHYPADRAFT_189464|solute carrier family 15 (peptide/histidine transporter), member 3/4	GO:0005886//plasma membrane	GO:0010542//nitrate efflux transmembrane transporter activity	GO:0015706//nitrate transport;GO:0010447//response to acidity	gi|460412111|ref|XP_004251446.1|/0/PREDICTED: nitrate excretion transporter 1-like [Solanum lycopersicum]
Solyc01g103360	31.6233	93.0623	1.55721	0.00188453	0.0326607	-	GO:0005794//Golgi apparatus;GO:0005576//extracellular region	GO:0030775//glucuronoxylan 4-O-methyltransferase activity	GO:0045492//xylan biosynthetic process;GO:0010413//glucuronoxylan metabolic process	gi|460369174|ref|XP_004230438.1|/2.07553e-158/PREDICTED: glucuronoxylan 4-O-methyltransferase 1-like [Solanum lycopersicum]
Solyc12g005610	37.9985	111.405	1.5518	0.001481	0.0272472	K13420|1|1e-23|108|sbi:SORBI_06g028760|LRR receptor-like serine/threonine-protein kinase FLS2 [EC:2.7.11.1]	-	-	-	gi|224111446|ref|XP_002315858.1|/3.4422e-68/predicted protein [Populus trichocarpa]
Solyc01g005590	352.084	1030.96	1.55	1.22e-05	0.000557921	-	GO:0031225//anchored to membrane;GO:0005886//plasma membrane	GO:0005515//protein binding	GO:0006598//polyamine catabolic process;GO:0048767//root hair elongation;GO:0009698//phenylpropanoid metabolic process;GO:0042398//cellular modified amino acid biosynthetic process	gi|224144805|ref|XP_002325421.1|/4.84783e-13/predicted protein [Populus trichocarpa]
Solyc10g074540	573.712	1679.36	1.54951	6.41e-06	0.00032249	-	GO:0005576//extracellular region	-	-	gi|460407118|ref|XP_004249003.1|/0/PREDICTED: uncharacterized protein LOC101252337 [Solanum lycopersicum]
Solyc08g076610	28.754	84.157	1.54932	0.00242698	0.0391864	K02830|1|8e-150|527|pop:POPTR_826620|cell cycle checkpoint protein [EC:3.1.11.2]	GO:0005634//nucleus	GO:0008853//exodeoxyribonuclease III activity;GO:0003684//damaged DNA binding	GO:0006261//DNA-dependent DNA replication;GO:0000077//DNA damage checkpoint;GO:0006281//DNA repair	gi|460400883|ref|XP_004245961.1|/2.43411e-174/PREDICTED: cell cycle checkpoint protein RAD1-like [Solanum lycopersicum]
Solyc01g009700	34.5446	101.096	1.54919	0.00191149	0.0329991	K13420|1|2e-68|259|pop:POPTR_1075175|LRR receptor-like serine/threonine-protein kinase FLS2 [EC:2.7.11.1]	-	-	-	gi|4235643|gb|AAD13303.1|/0/NL0E [Solanum lycopersicum]
Solyc08g075680	32.7903	95.9516	1.54904	0.00235522	0.0384755	-	-	-	GO:0015996//chlorophyll catabolic process	gi|460401380|ref|XP_004246203.1|/0/PREDICTED: uncharacterized protein LOC101268215 [Solanum lycopersicum]
Solyc08g005610	392.433	1146.39	1.54658	8.7e-06	0.000417019	K09843|1|0.0|775|vvi:100264783|(+)-abscisic acid 8'-hydroxylase [EC:1.14.13.93]	GO:0005576//extracellular region	GO:0010295//(+)-abscisic acid 8'-hydroxylase activity;GO:0009055//electron carrier activity;GO:0019825//oxygen binding;GO:0020037//heme binding;GO:0005506//iron ion binding	GO:0022900//electron transport chain;GO:0009414//response to water deprivation;GO:0046345//abscisic acid catabolic process;GO:0032940//secretion by cell;GO:0030912;GO:0009737//response to abscisic acid stimulus;GO:0048838//release of seed from dormancy;GO:0050832//defense response to fungus;GO:0009639//response to red or far red light	gi|460397763|ref|XP_004244436.1|/0/PREDICTED: abscisic acid 8'-hydroxylase 1-like [Solanum lycopersicum]
Solyc02g036480	2803.64	8182.36	1.54522	3.43e-06	0.000194	K08488|1|1e-08|58.2|ath:AT1G32270|syntaxin 7	GO:0005886//plasma membrane	-	GO:0009863//salicylic acid mediated signaling pathway;GO:0009627//systemic acquired resistance;GO:0034976//response to endoplasmic reticulum stress;GO:0006865//amino acid transport	gi|460373713|ref|XP_004232659.1|/4.61386e-93/PREDICTED: protein NDR1-like [Solanum lycopersicum]
Solyc02g077710	1003.35	2926.58	1.54439	4.7e-06	0.000254146	K01640|1|1e-10|65.9|vcn:VOLCADRAFT_91759|hydroxymethylglutaryl-CoA lyase [EC:4.1.3.4];K10772|3|2e-07|54.7|vcn:VOLCADRAFT_118317|AP endonuclease 2 [EC:4.2.99.18];K03544|4|5e-07|53.5|vcn:VOLCADRAFT_91205|ATP-dependent Clp protease ATP-binding subunit ClpX	-	-	-	gi|460374235|ref|XP_004232917.1|/0/PREDICTED: uncharacterized protein LOC101261288 [Solanum lycopersicum]
Solyc08g008280	2691.48	7846.43	1.54364	3.68e-06	0.000206122	K13426|1|1e-14|79.3|ath:AT4G23550|WRKY transcription factor 29;K13424|3|1e-13|75.9|pop:POPTR_663578|WRKY transcription factor 33	-	-	-	gi|460398159|ref|XP_004244630.1|/0/PREDICTED: probable WRKY transcription factor 53-like [Solanum lycopersicum]
Solyc10g055810	15355.1	44733.7	1.54264	3.29e-06	0.000188663	K01183|1|3e-141|499|rcu:RCOM_0806420|chitinase [EC:3.2.1.14]	GO:0005773//vacuole;GO:0005618//cell wall;GO:0005576//extracellular region	GO:0004568//chitinase activity;GO:0008061//chitin binding	GO:0006032//chitin catabolic process;GO:0006952//defense response;GO:0000272//polysaccharide catabolic process;GO:0016998//cell wall macromolecule catabolic process	gi|350534566|ref|NP_001234403.1|/0/basic 30 kDa endochitinase precursor [Solanum lycopersicum]
Solyc06g082860	39.4876	114.681	1.53816	0.00132187	0.0249973	-	GO:0016020//membrane	-	GO:0016132//brassinosteroid biosynthetic process	gi|460393722|ref|XP_004242458.1|/0/PREDICTED: uncharacterized protein LOC101263424 [Solanum lycopersicum]
Solyc01g068080	44.8544	130.118	1.53649	0.00100788	0.0202871	K09753|1|4e-63|239|gmx:100799994|cinnamoyl-CoA reductase [EC:1.2.1.44]	GO:0005829//cytosol	GO:0045552//dihydrokaempferol 4-reductase activity;GO:0050662//coenzyme binding;GO:0000166//nucleotide binding	GO:0080110//sporopollenin biosynthetic process;GO:0055114//oxidation-reduction process	gi|460366626|ref|XP_004229182.1|/0/PREDICTED: tetraketide alpha-pyrone reductase 2-like [Solanum lycopersicum]
Solyc07g052240	105.764	306.589	1.53545	7.34e-05	0.00251564	K00423|1|1e-168|591|aly:ARALYDRAFT_892557|L-ascorbate oxidase [EC:1.10.3.3]	GO:0016020//membrane;GO:0009505//plant-type cell wall	GO:0005507//copper ion binding;GO:0008447//L-ascorbate oxidase activity	GO:0055114//oxidation-reduction process	gi|460395816|ref|XP_004243476.1|/0/PREDICTED: L-ascorbate oxidase homolog [Solanum lycopersicum]
Solyc01g098590	2241.5	6489.19	1.53358	4.36e-06	0.000240745	K15634|1|6e-06|49.7|ath:AT3G50520|probable phosphoglycerate mutase [EC:5.4.2.1]	GO:0005739//mitochondrion;GO:0005634//nucleus	GO:0003824//catalytic activity	GO:0008152//metabolic process	gi|460368622|ref|XP_004230164.1|/8.05113e-169/PREDICTED: broad-range acid phosphatase DET1-like [Solanum lycopersicum]
Solyc03g118370	192.916	558.012	1.53232	3.28e-05	0.00126629	K13289|1|0.0|734|vvi:100247312|cathepsin A (carboxypeptidase C) [EC:3.4.16.5]	GO:0005576//extracellular region;GO:0009506//plasmodesma;GO:0009505//plant-type cell wall	GO:0004185//serine-type carboxypeptidase activity	GO:0006508//proteolysis	gi|460380191|ref|XP_004235841.1|/0/PREDICTED: serine carboxypeptidase-like 45-like [Solanum lycopersicum]
Solyc01g109500	220.828	638.506	1.53178	1.88e-05	0.000804143	-	-	-	-	gi|460370152|ref|XP_004230918.1|/0/PREDICTED: BURP domain-containing protein 3-like isoform 1 [Solanum lycopersicum]
Solyc09g084450	830.977	2399.84	1.53006	7.69e-06	0.000377811	-	GO:0005576//extracellular region	GO:0004867//serine-type endopeptidase inhibitor activity;GO:0008233//peptidase activity	GO:0009611//response to wounding;GO:0010466//negative regulation of peptidase activity;GO:0006508//proteolysis	gi|460404371|ref|XP_004247656.1|/2.27847e-58/PREDICTED: wound-induced proteinase inhibitor 1-like [Solanum lycopersicum]
Solyc12g008830	65.6376	189.456	1.52927	0.0002791	0.00745722	-	-	GO:0003677//DNA binding	GO:0048731;GO:1901701;GO:0006355//regulation of transcription, DNA-dependent;GO:0071310//cellular response to organic substance;GO:0007165//signal transduction;GO:0048581;GO:0009725//response to hormone stimulus	gi|460412562|ref|XP_004251667.1|/1.53348e-170/PREDICTED: putative GATA transcription factor 22-like [Solanum lycopersicum]
Solyc02g081440	27.5846	79.5108	1.52729	0.00334062	0.0498086	K03514|1|2e-06|52.8|cre:CHLREDRAFT_17066|DNA polymerase sigma subunit [EC:2.7.7.7]	-	-	GO:0016458//gene silencing;GO:0090304;GO:0016569//covalent chromatin modification;GO:0043412//macromolecule modification;GO:0019219;GO:2000112;GO:0040029//regulation of gene expression, epigenetic	gi|460375970|ref|XP_004233775.1|/0/PREDICTED: uncharacterized protein LOC101251847 [Solanum lycopersicum]
Solyc06g069820	167.785	483.306	1.52633	3.52e-05	0.00134604	-	-	-	-	gi|460391951|ref|XP_004241581.1|/3.77791e-131/PREDICTED: uncharacterized protein LOC101254212 [Solanum lycopersicum]
Solyc09g092740	248.462	714.85	1.52462	1.85e-05	0.000794977	K01115|1|9e-19|73.6|vcn:VOLCADRAFT_99471|phospholipase D [EC:3.1.4.4]	-	-	-	gi|460404897|ref|XP_004247915.1|/9.75048e-70/PREDICTED: uncharacterized protein LOC101257603 isoform 1 [Solanum lycopersicum]
Solyc02g078400	516.585	1485.2	1.52358	9.02e-06	0.000430479	K01466|1|0.0|739|rcu:RCOM_0936030|allantoinase [EC:3.5.2.5]	GO:0005783//endoplasmic reticulum	GO:0004038//allantoinase activity;GO:0050897//cobalt ion binding;GO:0008270//zinc ion binding	GO:0000256//allantoin catabolic process;GO:0010136//ureide catabolic process;GO:0006995//cellular response to nitrogen starvation	gi|460374121|ref|XP_004232860.1|/0/PREDICTED: probable allantoinase 1-like isoform 1 [Solanum lycopersicum]
Solyc11g072490	226.879	652.278	1.52357	2.59e-05	0.00104457	K11498|1|5e-16|84.7|ath:AT3G10180|centromeric protein E;K09291|3|5e-15|81.3|ath:AT1G79280|nucleoprotein TPR;K10400|5|2e-13|75.9|pop:POPTR_927223|kinesin family member 15	-	-	-	gi|460411747|ref|XP_004251267.1|/0/PREDICTED: interactor of constitutive active ROPs 3-like isoform 1 [Solanum lycopersicum]
Solyc01g087590	214.445	615.534	1.52123	2.67e-05	0.00106986	K13366|1|0.0|817|rcu:RCOM_0964720|polyamine oxidase (propane-1,3-diamine-forming) [EC:1.5.3.14]	GO:0005739//mitochondrion	GO:0050660//flavin adenine dinucleotide binding;GO:0046592//polyamine oxidase activity	GO:0006598//polyamine catabolic process;GO:0055114//oxidation-reduction process	gi|460367580|ref|XP_004229651.1|/0/PREDICTED: polyamine oxidase 1-like isoform 1 [Solanum lycopersicum]
Solyc03g097170	300.646	862.776	1.52092	1.81e-05	0.000775936	K09753|1|1e-36|151|sbi:SORBI_07g021680|cinnamoyl-CoA reductase [EC:1.2.1.44]	-	GO:0005488//binding;GO:0016616//oxidoreductase activity, acting on the CH-OH group of donors, NAD or NADP as acceptor	GO:0044710	gi|460379158|ref|XP_004235331.1|/0/PREDICTED: tetraketide alpha-pyrone reductase 1-like [Solanum lycopersicum]
Solyc06g007610	41.9852	120.451	1.5205	0.00133644	0.0251657	-	GO:0005829//cytosol	-	-	gi|460389598|ref|XP_004240438.1|/1.26756e-85/PREDICTED: uncharacterized protein At5g48480-like [Solanum lycopersicum]
Solyc08g079900	319.514	916.52	1.52029	1.65e-05	0.000721981	K08653|1|5e-09|61.6|bdi:100822086|membrane-bound transcription factor site-1 protease [EC:3.4.21.112]	-	GO:0042802//identical protein binding;GO:0004252//serine-type endopeptidase activity	GO:0043086//negative regulation of catalytic activity;GO:0006508//proteolysis	gi|460400304|ref|XP_004245675.1|/0/PREDICTED: pathogenesis related protein P69G [Solanum lycopersicum]
Solyc05g005760	276.993	794.166	1.51959	2.18e-05	0.000911053	-	GO:0005576//extracellular region;GO:0005634//nucleus	-	GO:0009086//methionine biosynthetic process;GO:0000394//RNA splicing, via endonucleolytic cleavage and ligation	gi|460385986|ref|XP_004238681.1|/0/PREDICTED: uncharacterized protein LOC101255990 [Solanum lycopersicum]
Solyc09g018010	5670.3	16256.5	1.51952	4.5e-06	0.000246438	-	-	-	GO:0006810//transport	gi|460401532|ref|XP_004246276.1|/7.85801e-59/PREDICTED: non-specific lipid-transfer protein 1-like [Solanum lycopersicum]
Solyc12g042570	33.4816	95.926	1.51855	0.00267052	0.0422884	K01090|1|2e-125|446|pop:POPTR_561999|protein phosphatase [EC:3.1.3.16]	GO:0005886//plasma membrane	GO:0046872//metal ion binding;GO:0004722//protein serine/threonine phosphatase activity	GO:0009737//response to abscisic acid stimulus;GO:0006470//protein dephosphorylation	gi|460413874|ref|XP_004252301.1|/0/PREDICTED: probable protein phosphatase 2C 60-like [Solanum lycopersicum]
Solyc06g051260	241.549	691.53	1.51747	2.38e-05	0.000977796	K12126|1|2e-07|53.9|aly:ARALYDRAFT_471048|phytochrome-interacting factor 3;K13422|3|6e-07|52.4|ath:AT1G32640|transcription factor MYC2	-	-	-	gi|460390614|ref|XP_004240923.1|/1.52016e-123/PREDICTED: transcription factor bHLH51-like [Solanum lycopersicum]
Solyc03g006970	435.531	1243.62	1.5137	1.31e-05	0.000591552	K11262|1|5e-09|61.6|aly:ARALYDRAFT_473714|acetyl-CoA carboxylase / biotin carboxylase [EC:6.4.1.2 6.3.4.14]	GO:0016023//cytoplasmic membrane-bounded vesicle;GO:0005618//cell wall;GO:0048046//apoplast	GO:0042802//identical protein binding;GO:0004252//serine-type endopeptidase activity	GO:0008356//asymmetric cell division;GO:0006508//proteolysis;GO:0043086//negative regulation of catalytic activity	gi|350537305|ref|NP_001234288.1|/0/SBT2 protein precursor [Solanum lycopersicum]
Solyc10g054820	181.712	518.82	1.51358	3.16e-05	0.00122897	K09872|1|7e-25|112|aly:ARALYDRAFT_492536|aquaporin PIP;K09873|2|7e-25|112|osa:4348981|aquaporin TIP	GO:0016021//integral to membrane	GO:0005215//transporter activity	GO:0006810//transport	gi|460406429|ref|XP_004248667.1|/0/PREDICTED: probable aquaporin PIP1-4-like isoform 1 [Solanum lycopersicum]
Solyc04g054690	1694.73	4834.7	1.51237	6.27e-06	0.000319803	K00423|1|5e-176|615|vvi:100251280|L-ascorbate oxidase [EC:1.10.3.3]	GO:0005576//extracellular region	GO:0005507//copper ion binding;GO:0008447//L-ascorbate oxidase activity	GO:0055114//oxidation-reduction process	gi|350537917|ref|NP_001234829.1|/0/ascorbate oxidase precursor [Solanum lycopersicum]
Solyc07g065530	210.032	598.749	1.51134	3.31e-05	0.00127527	K01115|1|1e-12|70.9|vcn:VOLCADRAFT_99471|phospholipase D [EC:3.1.4.4]	-	-	-	gi|460397023|ref|XP_004244068.1|/5.51518e-102/PREDICTED: uncharacterized protein LOC101258472 [Solanum lycopersicum]
Solyc01g107520	324.035	923.45	1.51088	1.65e-05	0.000720927	-	-	-	-	gi|460369768|ref|XP_004230729.1|/1.18093e-134/PREDICTED: uncharacterized protein LOC101249214 [Solanum lycopersicum]
Solyc03g006830	68.1872	194.111	1.50931	0.000344115	0.00878918	K09264|1|1e-35|147|bdi:100842079|MADS-box transcription factor, plant	-	GO:0005488//binding	GO:0006351//transcription, DNA-dependent	gi|460376714|ref|XP_004234142.1|/2.35828e-121/PREDICTED: MADS-box protein SOC1-like [Solanum lycopersicum]
Solyc11g011210	123.354	351.051	1.50888	7.92e-05	0.00267931	-	GO:0005576//extracellular region;GO:0009506//plasmodesma	-	GO:0009739//response to gibberellin stimulus;GO:0009751//response to salicylic acid stimulus;GO:0010286//heat acclimation	gi|350534694|ref|NP_001234666.1|/4.65364e-56/protein RSI-1 precursor [Solanum lycopersicum]
Solyc09g061930	129.41	368.182	1.50848	8.48e-05	0.00284134	K00924|1|3e-65|248|aly:ARALYDRAFT_473063|[EC:2.7.1.-]	GO:0016021//integral to membrane;GO:0009506//plasmodesma;GO:0005886//plasma membrane	GO:0004674//protein serine/threonine kinase activity;GO:0005524//ATP binding	GO:0009944//polarity specification of adaxial/abaxial axis;GO:0006468//protein phosphorylation;GO:0010075//regulation of meristem growth;GO:0010014//meristem initiation;GO:0007169//transmembrane receptor protein tyrosine kinase signaling pathway;GO:0009855//determination of bilateral symmetry	gi|460403251|ref|XP_004247106.1|/0/PREDICTED: putative kinase-like protein TMKL1-like [Solanum lycopersicum]
Solyc12g042760	92.9521	263.797	1.50487	0.000178817	0.00526513	K13420|1|7e-36|150|pop:POPTR_1075175|LRR receptor-like serine/threonine-protein kinase FLS2 [EC:2.7.11.1]	GO:0005739//mitochondrion;GO:0031225//anchored to membrane	GO:0004872//receptor activity;GO:0016491//oxidoreductase activity;GO:0005515//protein binding	GO:0010103//stomatal complex morphogenesis;GO:0009737//response to abscisic acid stimulus;GO:0008356//asymmetric cell division;GO:0048443//stamen development;GO:0002237//response to molecule of bacterial origin;GO:0042127//regulation of cell proliferation;GO:0007165//signal transduction;GO:0008152//metabolic process	gi|460414249|ref|XP_004252485.1|/0/PREDICTED: protein TOO MANY MOUTHS-like [Solanum lycopersicum]
Solyc10g080870	76.4777	216.747	1.5029	0.000279801	0.00745722	K00517|1|2e-119|427|ath:AT5G52320|[EC:1.14.-.-];K15405|3|7e-118|422|aly:ARALYDRAFT_474859|cytochrome P450, family 96, subfamily A, polypeptide 15 (midchain alkane hydroxylase);K15402|4|2e-99|361|rcu:RCOM_1376710|cytochrome P450, family 86, subfamily B, polypeptide 1 (fatty acid omega-hydroxylase) [EC:1.14.-.-]	-	GO:0016491//oxidoreductase activity;GO:0005488//binding	-	gi|460407756|ref|XP_004249316.1|/0/PREDICTED: cytochrome P450 86B1-like isoform 1 [Solanum lycopersicum]
Solyc03g118410	2713.03	7681.69	1.50152	6.05e-06	0.000311709	K03955|1|5e-12|67.8|osa:4332854|NADH dehydrogenase (ubiquinone) 1 alpha/beta subcomplex 1 [EC:1.6.5.3 1.6.99.3]	GO:0044434	GO:0016491//oxidoreductase activity	GO:0006633//fatty acid biosynthetic process	gi|350536815|ref|NP_001234522.1|/7.72865e-67/acyl carrier protein [Solanum lycopersicum]
Solyc09g014240	45.2285	127.859	1.49924	0.00111215	0.0219279	K00423|1|1e-68|259|rcu:RCOM_0657480|L-ascorbate oxidase [EC:1.10.3.3]	GO:0048046//apoplast	GO:0005507//copper ion binding;GO:0052716//hydroquinone:oxygen oxidoreductase activity;GO:0008447//L-ascorbate oxidase activity	GO:0009834//secondary cell wall biogenesis;GO:0046274//lignin catabolic process;GO:0055114//oxidation-reduction process	gi|460401668|ref|XP_004246339.1|/0/PREDICTED: laccase-4-like [Solanum lycopersicum]
Solyc11g071280	109.375	308.418	1.49561	0.000132912	0.004104	K00826|1|4e-152|535|vvi:100266456|branched-chain amino acid aminotransferase [EC:2.6.1.42]	GO:0009570//chloroplast stroma	GO:0008696//4-amino-4-deoxychorismate lyase activity;GO:0047810//D-alanine:2-oxoglutarate aminotransferase activity	GO:0046654//tetrahydrofolate biosynthetic process;GO:0008153//para-aminobenzoic acid biosynthetic process	gi|350538939|ref|NP_001234878.1|/0/4-amino-4-deoxychorismate lyase [Solanum lycopersicum]
Solyc06g051540	172.195	485.191	1.49451	5.08e-05	0.00184088	K00924|1|6e-61|233|aly:ARALYDRAFT_486409|[EC:2.7.1.-]	-	GO:0004672//protein kinase activity;GO:0000166//nucleotide binding	GO:0016310//phosphorylation	gi|56694212|gb|AAW22874.1|/0/putative protein kinase [Solanum lycopersicum]
Solyc11g044360	105.177	296.245	1.49397	0.000137698	0.00422243	K15032|1|1e-32|138|ppp:PHYPADRAFT_161831|mTERF domain-containing protein, mitochondrial;K15031|4|4e-32|136|aly:ARALYDRAFT_481036|transcription termination factor, mitochondrial	GO:0005739//mitochondrion;GO:0009507//chloroplast	-	GO:0010103//stomatal complex morphogenesis;GO:0016226//iron-sulfur cluster assembly;GO:0010027//thylakoid membrane organization;GO:0010228//vegetative to reproductive phase transition of meristem;GO:0048481//ovule development;GO:0045893//positive regulation of transcription, DNA-dependent;GO:0009793//embryo development ending in seed dormancy	gi|460410656|ref|XP_004250738.1|/0/PREDICTED: uncharacterized protein LOC101248448 [Solanum lycopersicum]
Solyc01g010230	750.53	2112.48	1.49296	1.13e-05	0.000519572	-	-	-	-	gi|147778529|emb|CAN71712.1|/2.84235e-29/hypothetical protein VITISV_013459 [Vitis vinifera]
Solyc07g066360	245.858	691.972	1.49289	2.8e-05	0.00110945	-	-	-	-	gi|255563278|ref|XP_002522642.1|/1.48352e-09/conserved hypothetical protein [Ricinus communis]
Solyc10g074720	82.3747	231.767	1.4924	0.000299905	0.00790759	K07760|1|3e-150|529|ath:AT3G54180|cyclin-dependent kinase [EC:2.7.11.22];K00924|2|7e-119|424|ath:AT1G20930|[EC:2.7.1.-];K02206|5|2e-101|367|zma:100284730|cyclin-dependent kinase 2 [EC:2.7.11.22]	GO:0005737//cytoplasm;GO:0005634//nucleus	GO:0008353//RNA polymerase II carboxy-terminal domain kinase activity;GO:0005524//ATP binding;GO:0030332//cyclin binding	GO:0006468//protein phosphorylation;GO:0048825//cotyledon development;GO:0009826//unidimensional cell growth;GO:0010376//stomatal complex formation	gi|350534706|ref|NP_001233899.1|/2.58626e-176/B1-type cyclin dependent kinase [Solanum lycopersicum]
Solyc10g081980	1365.41	3840.99	1.49214	7.13e-06	0.000352583	K08488|1|4e-28|122|ath:AT1G32270|syntaxin 7	-	-	-	gi|24429927|gb|AAN52931.1|/7.29048e-126/hin1-like protein [Solanum tuberosum]
Solyc05g009880	96.7778	271.681	1.48917	0.000201655	0.00577669	K13422|1|1e-08|58.9|sbi:SORBI_01g028230|transcription factor MYC2;K12126|5|2e-08|58.2|aly:ARALYDRAFT_471048|phytochrome-interacting factor 3	-	GO:0005488//binding	GO:0006355//regulation of transcription, DNA-dependent	gi|460386566|ref|XP_004238969.1|/1.59663e-170/PREDICTED: transcription factor bHLH30-like [Solanum lycopersicum]
Solyc05g012850	332.896	932.238	1.48563	3.12e-05	0.00121415	-	-	-	-	gi|460386822|ref|XP_004239095.1|/1.02505e-143/PREDICTED: uncharacterized protein LOC101256182 [Solanum lycopersicum]
Solyc03g097050	1345.65	3764.14	1.48401	1.03e-05	0.000482407	K00770|1|0.0|1526|pop:POPTR_1099076|1,4-beta-D-xylan synthase [EC:2.4.2.24]	GO:0030173//integral to Golgi membrane;GO:0005768//endosome;GO:0005802//trans-Golgi network;GO:0005783//endoplasmic reticulum;GO:0005886//plasma membrane	GO:0051753//mannan synthase activity;GO:0016760//cellulose synthase (UDP-forming) activity	GO:0048767//root hair elongation;GO:0030244//cellulose biosynthetic process;GO:0009409//response to cold;GO:0009832//plant-type cell wall biogenesis	gi|460379057|ref|XP_004235281.1|/0/PREDICTED: cellulose synthase-like protein D3-like [Solanum lycopersicum]
Solyc12g055840	2147.55	5989.56	1.47976	1.08e-05	0.000500555	-	GO:0005576//extracellular region;GO:0046658//anchored to plasma membrane	GO:0042973//glucan endo-1,3-beta-D-glucosidase activity;GO:0043169//cation binding	GO:0005975//carbohydrate metabolic process	gi|460414517|ref|XP_004252615.1|/0/PREDICTED: glucan endo-1,3-beta-glucosidase 11-like [Solanum lycopersicum]
Solyc01g097970	102.362	285.365	1.47912	0.000151822	0.00458584	K01520|1|3e-59|224|pop:POPTR_816992|dUTP pyrophosphatase [EC:3.6.1.23]	GO:0005829//cytosol	GO:0004170//dUTP diphosphatase activity;GO:0042802//identical protein binding;GO:0000287//magnesium ion binding	GO:0006281//DNA repair;GO:0006261//DNA-dependent DNA replication;GO:0006226//dUMP biosynthetic process;GO:0046080//dUTP metabolic process	gi|460370817|ref|XP_004231245.1|/3.27311e-73/PREDICTED: deoxyuridine 5'-triphosphate nucleotidohydrolase-like [Solanum lycopersicum]
Solyc08g080590	329.61	918.531	1.47857	2.75e-05	0.00109716	-	-	-	GO:0006950//response to stress	gi|460400217|ref|XP_004245632.1|/3.72914e-63/PREDICTED: thaumatin-like protein-like [Solanum lycopersicum]
Solyc07g038190	33.4296	93.1092	1.4778	0.00322185	0.0484938	-	GO:0043231//intracellular membrane-bounded organelle;GO:0044444//cytoplasmic part	-	-	gi|460396405|ref|XP_004243764.1|/1.04137e-63/PREDICTED: uncharacterized protein LOC101246156 [Solanum lycopersicum]
Solyc01g087770	83.6508	232.767	1.47643	0.000328848	0.00847302	K08653|1|1e-06|52.8|vvi:100264570|membrane-bound transcription factor site-1 protease [EC:3.4.21.112]	-	GO:0008233//peptidase activity	GO:0006508//proteolysis	gi|169674674|gb|ACA64703.1|/1.55294e-116/subtilase [Nicotiana tabacum]
Solyc06g065970	2988.14	8314.06	1.47631	9.21e-06	0.000438054	-	GO:0005576//extracellular region;GO:0009535//chloroplast thylakoid membrane	GO:0008289//lipid binding	GO:0000038//very long-chain fatty acid metabolic process;GO:0006869//lipid transport;GO:0042335//cuticle development	gi|460392356|ref|XP_004241782.1|/1.82512e-68/PREDICTED: 14 kDa proline-rich protein DC2.15-like [Solanum lycopersicum]
Solyc10g083890	35.9792	100.104	1.47627	0.00309013	0.0470857	K01674|1|1e-99|360|vvi:100264066|carbonic anhydrase [EC:4.2.1.1]	GO:0009507//chloroplast;GO:0005886//plasma membrane	GO:0008270//zinc ion binding;GO:0004089//carbonate dehydratase activity;GO:0005388//calcium-transporting ATPase activity;GO:0005516//calmodulin binding	GO:0006816//calcium ion transport;GO:0009624//response to nematode;GO:0006730//one-carbon metabolic process;GO:0006882//cellular zinc ion homeostasis;GO:0009555//pollen development	gi|460408076|ref|XP_004249474.1|/7.57772e-158/PREDICTED: bifunctional monodehydroascorbate reductase and carbonic anhydrase nectarin-3-like [Solanum lycopersicum]
Solyc01g066640	91.0962	253.437	1.47616	0.00019303	0.00555832	-	-	-	-	gi|460366770|ref|XP_004229252.1|/0/PREDICTED: uncharacterized protein LOC101257508 [Solanum lycopersicum]
Solyc07g052910	55.5928	154.575	1.47533	0.000726258	0.0158541	-	-	-	-	gi|460395736|ref|XP_004243437.1|/1.91395e-86/PREDICTED: uncharacterized protein LOC101244202 [Solanum lycopersicum]
Solyc11g010250	6626.32	18414.2	1.47454	8.62e-06	0.000415354	-	-	-	-	gi|460409381|ref|XP_004250117.1|/3.13905e-76/PREDICTED: uncharacterized protein LOC101262884 isoform 1 [Solanum lycopersicum]
Solyc01g079500	84.1314	233.733	1.47414	0.000284156	0.00752811	K02210|1|0.0|1294|rcu:RCOM_1347200|minichromosome maintenance protein 7 (cell division control protein 47)	GO:0005829//cytosol;GO:0042555//MCM complex;GO:0005634//nucleus	GO:0008094//DNA-dependent ATPase activity;GO:0005515//protein binding;GO:0003677//DNA binding;GO:0005524//ATP binding;GO:0003678//DNA helicase activity	GO:0051567//histone H3-K9 methylation;GO:0006268//DNA unwinding involved in replication;GO:0008283//cell proliferation;GO:0006342//chromatin silencing;GO:0010182//sugar mediated signaling pathway;GO:0006306//DNA methylation;GO:0006270//DNA replication initiation	gi|460367064|ref|XP_004229395.1|/0/PREDICTED: protein PROLIFERA-like [Solanum lycopersicum]
Solyc12g055710	539.278	1493.67	1.46976	1.76e-05	0.000760381	K05283|1|2e-15|80.9|aly:ARALYDRAFT_354960|phosphatidylinositol glycan, class W [EC:2.3.-.-];K11982|2|5e-11|66.2|sbi:SORBI_03g011120|E3 ubiquitin-protein ligase RNF115/126 [EC:6.3.2.19];K15692|4|3e-09|60.5|sbi:SORBI_06g034040|E3 ubiquitin-protein ligase RNF13 [EC:6.3.2.19]	-	-	-	gi|460414537|ref|XP_004252625.1|/5.46702e-147/PREDICTED: RING-H2 finger protein ATL3-like [Solanum lycopersicum]
Solyc08g007080	122.819	339.989	1.46896	0.000152577	0.00460238	K01099|1|2e-48|192|ota:Ot04g02290|phosphatidylinositol-bisphosphatase [EC:3.1.3.36]	GO:0005737//cytoplasm	GO:0016491//oxidoreductase activity;GO:0004445//inositol-polyphosphate 5-phosphatase activity	GO:0046855//inositol phosphate dephosphorylation;GO:0052542//defense response by callose deposition;GO:0009753//response to jasmonic acid stimulus;GO:0009845//seed germination;GO:0009414//response to water deprivation;GO:0009611//response to wounding;GO:0042538//hyperosmotic salinity response;GO:0009733//response to auxin stimulus;GO:0046854//phosphatidylinositol phosphorylation;GO:0009738//absci…	gi|460397989|ref|XP_004244547.1|/0/PREDICTED: type I inositol 1,4,5-trisphosphate 5-phosphatase 2-like [Solanum lycopersicum]
Solyc12g042730	42.622	117.97	1.46875	0.00213815	0.0357717	-	-	-	GO:0044765	gi|460414247|ref|XP_004252484.1|/6.85743e-94/PREDICTED: uncharacterized protein LOC101247994 [Solanum lycopersicum]
Solyc09g083360	153.384	423.946	1.46673	7.58e-05	0.00258213	-	-	GO:0005488//binding	GO:0006355//regulation of transcription, DNA-dependent	gi|460404355|ref|XP_004247648.1|/2.3253e-130/PREDICTED: transcription factor bHLH92-like [Solanum lycopersicum]
Solyc03g006240	149.234	412.198	1.46576	9.93e-05	0.00320942	K00514|1|1e-57|222|rcu:RCOM_1428040|zeta-carotene desaturase [EC:1.3.5.6];K01206|2|1e-38|158|aly:ARALYDRAFT_475890|alpha-L-fucosidase [EC:3.2.1.51]	GO:0016023//cytoplasmic membrane-bounded vesicle	GO:0016788//hydrolase activity, acting on ester bonds	GO:0006629//lipid metabolic process	gi|460376620|ref|XP_004234095.1|/0/PREDICTED: GDSL esterase/lipase At5g45910-like [Solanum lycopersicum]
Solyc01g103060	42.2503	116.545	1.46385	0.00219819	0.0365011	-	GO:0031225//anchored to membrane	-	-	gi|460369129|ref|XP_004230416.1|/7.70787e-75/PREDICTED: lipid transfer-like protein VAS-like [Solanum lycopersicum]
Solyc02g094160	490.705	1352.76	1.46298	1.98e-05	0.000836494	K10808|1|2e-172|603|vvi:100243004|ribonucleoside-diphosphate reductase subunit M2 [EC:1.17.4.1]	GO:0005971//ribonucleoside-diphosphate reductase complex	GO:0046914//transition metal ion binding;GO:0004748//ribonucleoside-diphosphate reductase activity, thioredoxin disulfide as acceptor	GO:0012501//programmed cell death;GO:0055114//oxidation-reduction process;GO:0006281//DNA repair;GO:0051726//regulation of cell cycle;GO:0009165//nucleotide biosynthetic process;GO:0006261//DNA-dependent DNA replication;GO:0009186//deoxyribonucleoside diphosphate metabolic process;GO:0007275//multicellular organismal development	gi|460371916|ref|XP_004231780.1|/0/PREDICTED: ribonucleoside-diphosphate reductase small chain-like [Solanum lycopersicum]
Solyc02g067580	502.972	1385.15	1.46149	2.31e-05	0.000956972	-	GO:0005777//peroxisome	-	-	gi|460375088|ref|XP_004233340.1|/3.0733e-47/PREDICTED: uncharacterized protein LOC101261386 [Solanum lycopersicum]
Solyc03g119080	5101.47	14042	1.46077	1.02e-05	0.000477302	K05350|1|0.0|861|rcu:RCOM_1071830|beta-glucosidase [EC:3.2.1.21]	GO:0022626//cytosolic ribosome;GO:0009505//plant-type cell wall;GO:0009507//chloroplast	GO:0080079//cellobiose glucosidase activity;GO:0043169//cation binding;GO:0047668//amygdalin beta-glucosidase activity;GO:0004567//beta-mannosidase activity;GO:0080082//esculin beta-glucosidase activity;GO:0080081//4-methylumbelliferyl-beta-D-glucopyranoside beta-glucosidase activity;GO:0080083//beta-gentiobiose beta-glucosidase activity	GO:0005975//carbohydrate metabolic process	gi|350538893|ref|NP_001234620.1|/0/beta-mannosidase enzyme precursor [Solanum lycopersicum]
Solyc11g006230	169.269	465.801	1.4604	8.82e-05	0.00292719	-	GO:0005634//nucleus	GO:0003713//transcription coactivator activity;GO:0005515//protein binding	GO:0009965//leaf morphogenesis;GO:0009955//adaxial/abaxial pattern specification;GO:0008283//cell proliferation;GO:0048481//ovule development	gi|460408983|ref|XP_004249920.1|/2.27889e-124/PREDICTED: GRF1-interacting factor 1-like [Solanum lycopersicum]
Solyc09g014160	46.5021	127.88	1.45942	0.00174242	0.0307744	-	GO:0016324//apical plasma membrane	-	GO:0010233//phloem transport;GO:0010588//cotyledon vascular tissue pattern formation;GO:0010088//phloem development;GO:0022622//root system development	gi|460402699|ref|XP_004246848.1|/0/PREDICTED: UPF0503 protein At3g09070, chloroplastic-like [Solanum lycopersicum]
Solyc01g110680	37.9465	104.342	1.45928	0.00276671	0.0431954	K14488|1|2e-28|121|vvi:100253710|SAUR family protein	-	-	-	gi|460370283|ref|XP_004230983.1|/1.1183e-41/PREDICTED: auxin-induced protein 15A-like [Solanum lycopersicum]
Solyc02g065430	66.2223	181.887	1.45765	0.000542544	0.0127123	-	-	-	-	gi|460375234|ref|XP_004233412.1|/1.62466e-81/PREDICTED: uncharacterized protein LOC101258031 [Solanum lycopersicum]
Solyc04g072620	72.1738	197.936	1.45549	0.000481267	0.0116517	-	-	-	-	-
Solyc12g010710	359.692	985.983	1.4548	3.26e-05	0.00125987	-	-	-	-	gi|224127035|ref|XP_002329367.1|/1.10326e-12/predicted protein [Populus trichocarpa]
Solyc03g111550	615.957	1685.49	1.45227	2.36e-05	0.000972562	K00514|1|2e-41|167|rcu:RCOM_1428040|zeta-carotene desaturase [EC:1.3.5.6];K01206|2|2e-31|134|aly:ARALYDRAFT_475890|alpha-L-fucosidase [EC:3.2.1.51]	GO:0005576//extracellular region;GO:0016023//cytoplasmic membrane-bounded vesicle	GO:0004091//carboxylesterase activity	-	gi|460381151|ref|XP_004236316.1|/0/PREDICTED: GDSL esterase/lipase At3g48460-like [Solanum lycopersicum]
Solyc07g063970	36.9925	101.036	1.44956	0.00239156	0.0388122	-	GO:0005622//intracellular	GO:0008270//zinc ion binding	-	gi|460397214|ref|XP_004244163.1|/0/PREDICTED: uncharacterized protein LOC101261138 [Solanum lycopersicum]
Solyc05g018050	165.763	452.365	1.44837	9.9e-05	0.00320863	K11982|1|1e-09|59.3|bdi:100838213|E3 ubiquitin-protein ligase RNF115/126 [EC:6.3.2.19]	-	-	-	gi|359484547|ref|XP_003633119.1|/1.0592e-15/PREDICTED: E3 ubiquitin-protein ligase RNF115-like [Vitis vinifera]
Solyc03g098060	272.372	743.188	1.44815	5e-05	0.0018185	-	-	-	-	gi|460379240|ref|XP_004235372.1|/1.16201e-102/PREDICTED: ZF-HD homeobox protein At4g24660-like [Solanum lycopersicum]
Solyc02g087010	53.9403	147.18	1.44815	0.00156047	0.0284434	-	-	-	-	gi|460372949|ref|XP_004232285.1|/0/PREDICTED: uncharacterized protein LOC101247577 [Solanum lycopersicum]
Solyc05g054480	68.0806	185.661	1.44735	0.000642691	0.0144271	K05692|1|0.0|746|rcu:RCOM_0503940|actin beta/gamma 1;K10355|4|0.0|744|ath:AT3G12110|actin, other eukaryote	GO:0005856//cytoskeleton;GO:0005739//mitochondrion;GO:0009506//plasmodesma;GO:0009941//chloroplast envelope;GO:0009570//chloroplast stroma;GO:0005886//plasma membrane	GO:0005524//ATP binding;GO:0005200//structural constituent of cytoskeleton	GO:0010498//proteasomal protein catabolic process;GO:0030036//actin cytoskeleton organization;GO:0006094//gluconeogenesis	gi|460388268|ref|XP_004239790.1|/0/PREDICTED: actin-58-like [Solanum lycopersicum]
Solyc04g015030	125.849	343.172	1.44724	0.000174872	0.00516269	K07213|1|2e-08|57.8|ath:AT3G56240|copper chaperone	-	GO:0046872//metal ion binding	GO:0030001//metal ion transport	gi|460381852|ref|XP_004236655.1|/9.78147e-153/PREDICTED: uncharacterized protein LOC101257650 [Solanum lycopersicum]
Solyc04g074920	43.4222	118.366	1.44675	0.00178688	0.0313354	-	-	GO:0016757//transferase activity, transferring glycosyl groups	-	gi|460385691|ref|XP_004238535.1|/0/PREDICTED: uncharacterized protein LOC101245251 [Solanum lycopersicum]
Solyc01g103580	306.654	834.294	1.44394	4.31e-05	0.00160575	-	GO:0005783//endoplasmic reticulum;GO:0005739//mitochondrion	-	-	gi|460369208|ref|XP_004230455.1|/5.07684e-124/PREDICTED: uncharacterized protein LOC101268616 isoform 1 [Solanum lycopersicum]
Solyc08g066050	89.072	242.247	1.44343	0.000387028	0.00969797	K08850|1|3e-154|542|vvi:100268070|aurora kinase, other [EC:2.7.11.1]	GO:0005730//nucleolus;GO:0005874//microtubule;GO:0005819//spindle;GO:0009504//cell plate	GO:0004713//protein tyrosine kinase activity;GO:0035175//histone kinase activity (H3-S10 specific);GO:0005524//ATP binding	GO:0010103//stomatal complex morphogenesis;GO:0000278//mitotic cell cycle;GO:0042127//regulation of cell proliferation;GO:0051567//histone H3-K9 methylation;GO:0010075//regulation of meristem growth;GO:0006342//chromatin silencing;GO:0043987//histone H3-S10 phosphorylation	gi|460399211|ref|XP_004245135.1|/2.1894e-175/PREDICTED: serine/threonine-protein kinase Aurora-1-like [Solanum lycopersicum]
Solyc10g052490	1311.8	3565.78	1.44267	1.79e-05	0.000769359	K00224|1|2e-111|400|aly:ARALYDRAFT_476671|[EC:1.3.1.-];K13081|5|2e-58|224|pop:POPTR_835080|leucoanthocyanidin reductase [EC:1.17.1.3]	-	GO:0000166//nucleotide binding	GO:0046686//response to cadmium ion	gi|460406525|ref|XP_004248713.1|/3.78927e-178/PREDICTED: isoflavone reductase homolog [Solanum lycopersicum]
Solyc09g015520	121.065	328.663	1.44083	0.000217549	0.00616046	K08286|1|2e-126|451|ath:AT4G28490|protein-serine/threonine kinase [EC:2.7.11.-];K00924|3|1e-121|436|ath:AT1G28440|[EC:2.7.1.-];K13420|4|4e-121|434|pop:POPTR_1075175|LRR receptor-like serine/threonine-protein kinase FLS2 [EC:2.7.11.1]	GO:0005886//plasma membrane;GO:0016021//integral to membrane	GO:0004714//transmembrane receptor protein tyrosine kinase activity;GO:0005524//ATP binding;GO:0032440//2-alkenal reductase [NAD(P)] activity	GO:0006468//protein phosphorylation;GO:0055114//oxidation-reduction process	gi|460401561|ref|XP_004246289.1|/0/PREDICTED: probably inactive leucine-rich repeat receptor-like protein kinase At3g28040-like [Solanum lycopersicum]
Solyc02g020890	516.684	1401.68	1.43981	2.98e-05	0.00116617	-	-	-	GO:0010363//regulation of plant-type hypersensitive response;GO:0052542//defense response by callose deposition;GO:0009620//response to fungus;GO:0009414//response to water deprivation;GO:0009867//jasmonic acid mediated signaling pathway;GO:0009611//response to wounding;GO:0009695//jasmonic acid biosynthetic process;GO:0042538//hyperosmotic salinity response;GO:0010200//response to chitin;GO:0006…	gi|460371388|ref|XP_004231521.1|/0/PREDICTED: transmembrane protein 53-like [Solanum lycopersicum]
Solyc12g009220	2458.59	6663.82	1.43852	1.57e-05	0.000695146	K13464|1|2e-45|180|vvi:100254231|jasmonate ZIM domain-containing protein	-	-	-	gi|350539041|ref|NP_001234883.1|/1.16192e-141/jasmonate ZIM-domain protein 1 [Solanum lycopersicum]
Solyc00g217960	490.901	1330.28	1.43823	3.56e-05	0.00134979	K10601|1|3e-10|62.4|cme:CMG190C|E3 ubiquitin-protein ligase synoviolin [EC:6.3.2.19];K05283|2|5e-09|58.2|aly:ARALYDRAFT_354960|phosphatidylinositol glycan, class W [EC:2.3.-.-];K15277|3|5e-09|58.2|ota:Ot17g00560|solute carrier family 35 (adenosine 3'-phospho 5'-phosphosulfate transporter), member B3	-	-	-	gi|460367677|ref|XP_004229697.1|/1.25713e-40/PREDICTED: RING-H2 finger protein ATL34-like [Solanum lycopersicum]
Solyc02g082550	419.906	1137.86	1.43819	3.53e-05	0.00134604	K08832|1|1e-138|491|pop:POPTR_1109471|serine/threonine-protein kinase SRPK3 [EC:2.7.11.1]	GO:0005634//nucleus	GO:0004713//protein tyrosine kinase activity;GO:0004712//protein serine/threonine/tyrosine kinase activity;GO:0005524//ATP binding;GO:0004674//protein serine/threonine kinase activity	GO:0006468//protein phosphorylation	gi|460373534|ref|XP_004232572.1|/0/PREDICTED: SRSF protein kinase 2-like [Solanum lycopersicum]
Solyc06g075850	181.662	492.01	1.43743	6.84e-05	0.00237856	K11254|1|2e-53|204|mtr:MTR_2g096100|histone H4	GO:0005829//cytosol;GO:0000786//nucleosome;GO:0005739//mitochondrion;GO:0005730//nucleolus;GO:0009506//plasmodesma;GO:0005774//vacuolar membrane;GO:0009579//thylakoid;GO:0009507//chloroplast;GO:0005794//Golgi apparatus;GO:0005886//plasma membrane	GO:0003677//DNA binding;GO:0046982//protein heterodimerization activity	GO:0009414//response to water deprivation;GO:0006334//nucleosome assembly	gi|350539093|ref|NP_001234118.1|/1.41921e-52/histone H4 [Solanum lycopersicum]
Solyc12g088930	73.5564	198.345	1.43109	0.000549028	0.012817	-	GO:0009507//chloroplast	GO:0003676//nucleic acid binding	-	gi|460414849|ref|XP_004252775.1|/3.8887e-157/PREDICTED: uncharacterized protein LOC101266496 isoform 1 [Solanum lycopersicum]
Solyc06g068240	80.3033	216.275	1.42933	0.000549636	0.0128177	K01507|1|0.0|1401|gmx:100803691|inorganic pyrophosphatase [EC:3.6.1.1]	GO:0005739//mitochondrion;GO:0009941//chloroplast envelope;GO:0009705//plant-type vacuole membrane;GO:0010008//endosome membrane;GO:0005886//plasma membrane	GO:0004427//inorganic diphosphatase activity;GO:0032440//2-alkenal reductase [NAD(P)] activity;GO:0009678//hydrogen-translocating pyrophosphatase activity	GO:0055114//oxidation-reduction process;GO:0009414//response to water deprivation;GO:0009651//response to salt stress;GO:0009926//auxin polar transport;GO:0048366//leaf development;GO:0015992//proton transport	gi|460392170|ref|XP_004241690.1|/0/PREDICTED: pyrophosphate-energized vacuolar membrane proton pump-like [Solanum lycopersicum]
Solyc07g052430	98.0562	264.086	1.42933	0.000305242	0.00801973	-	GO:0005634//nucleus	-	-	gi|460395790|ref|XP_004243464.1|/3.5663e-89/PREDICTED: transmembrane protein 97-like [Solanum lycopersicum]
Solyc01g103530	150.403	404.37	1.42684	0.000150809	0.00457393	K00924|1|0.0|934|aly:ARALYDRAFT_476729|[EC:2.7.1.-];K08286|5|8e-175|612|ath:AT4G28490|protein-serine/threonine kinase [EC:2.7.11.-]	GO:0016021//integral to membrane	GO:0032440//2-alkenal reductase [NAD(P)] activity;GO:0004709//MAP kinase kinase kinase activity;GO:0005524//ATP binding	GO:0000186//activation of MAPKK activity;GO:0010075//regulation of meristem growth;GO:0055114//oxidation-reduction process;GO:0048437//floral organ development	gi|460369200|ref|XP_004230451.1|/0/PREDICTED: leucine-rich repeat receptor-like serine/threonine-protein kinase BAM1-like [Solanum lycopersicum]
Solyc02g083860	81.1532	218.121	1.42641	0.000568043	0.013164	K00475|1|0.0|637|vvi:100233079|naringenin 3-dioxygenase [EC:1.14.11.9]	-	GO:0045486//naringenin 3-dioxygenase activity;GO:0016702//oxidoreductase activity, acting on single donors with incorporation of molecular oxygen, incorporation of two atoms of oxygen	GO:0055114//oxidation-reduction process	gi|460373360|ref|XP_004232488.1|/0/PREDICTED: naringenin,2-oxoglutarate 3-dioxygenase [Solanum lycopersicum]
Solyc09g008450	65.4245	175.798	1.42602	0.000791554	0.0169463	K06694|1|3e-11|66.6|mtr:MTR_5g043640|26S proteasome non-ATPase regulatory subunit 10	GO:0005634//nucleus;GO:0005829//cytosol	-	-	gi|460402208|ref|XP_004246606.1|/7.52187e-119/PREDICTED: tankyrase-2-like [Solanum lycopersicum]
Solyc12g014490	67.5504	181.372	1.42491	0.000735277	0.0159881	-	GO:0010005//cortical microtubule, transverse to long axis;GO:0009574//preprophase band;GO:0005819//spindle;GO:0009524//phragmoplast;GO:0005634//nucleus	GO:0008017//microtubule binding	GO:0051322//anaphase;GO:0001578//microtubule bundle formation;GO:0000910//cytokinesis;GO:0007020//microtubule nucleation;GO:0031116//positive regulation of microtubule polymerization	gi|460413043|ref|XP_004251905.1|/0/PREDICTED: 65-kDa microtubule-associated protein 1-like [Solanum lycopersicum]
Solyc01g109370	127.497	341.823	1.42279	0.000220878	0.00621582	K13513|1|2e-154|543|vvi:100248731|lysocardiolipin and lysophospholipid acyltransferase [EC:2.3.1.- 2.3.1.51]	GO:0005739//mitochondrion	GO:0003841//1-acylglycerol-3-phosphate O-acyltransferase activity	GO:0008152//metabolic process	gi|460370196|ref|XP_004230940.1|/0/PREDICTED: probable 1-acyl-sn-glycerol-3-phosphate acyltransferase 5-like isoform 1 [Solanum lycopersicum]
Solyc05g008480	45.4936	121.757	1.42027	0.00224883	0.0371475	K10753|1|9e-86|313|mtr:MTR_3g118150|histone chaperone ASF1	GO:0005737//cytoplasm;GO:0005634//nucleus	-	GO:0009294//DNA mediated transformation;GO:0006333//chromatin assembly or disassembly;GO:0031567//cell size control checkpoint;GO:0000724//double-strand break repair via homologous recombination;GO:0051301//cell division;GO:0008361//regulation of cell size;GO:0010091//trichome branching	gi|460386370|ref|XP_004238871.1|/4.05305e-110/PREDICTED: probable histone chaperone ASF1A-like [Solanum lycopersicum]
Solyc06g076920	86.3069	230.963	1.42011	0.000578513	0.0133509	K11778|1|3e-74|276|pop:POPTR_804506|ditrans,polycis-polyprenyl diphosphate synthase [EC:2.5.1.87]	GO:0009507//chloroplast	GO:0045547//dehydrodolichyl diphosphate synthase activity	GO:0019408//dolichol biosynthetic process;GO:0006744//ubiquinone biosynthetic process	gi|414091099|gb|AFW98431.1|/1.1469e-162/cis-prenyltransferase 7 [Solanum lycopersicum]
Solyc02g081450	452.112	1205.85	1.4153	4.47e-05	0.00165951	K08488|1|6e-06|50.1|ath:AT1G32270|syntaxin 7	GO:0005886//plasma membrane	-	GO:0009863//salicylic acid mediated signaling pathway;GO:0009627//systemic acquired resistance;GO:0034976//response to endoplasmic reticulum stress;GO:0006865//amino acid transport	gi|460373713|ref|XP_004232659.1|/1.88669e-151/PREDICTED: protein NDR1-like [Solanum lycopersicum]
Solyc02g080190	61.864	164.982	1.41514	0.000976714	0.0198841	K12669|1|4e-46|180|aly:ARALYDRAFT_334448|oligosaccharyltransferase complex subunit gamma	GO:0005737//cytoplasm;GO:0005886//plasma membrane;GO:0005635//nuclear envelope	GO:0008536//Ran GTPase binding;GO:0008565//protein transporter activity	GO:0006606//protein import into nucleus	gi|460373879|ref|XP_004232740.1|/7.69582e-67/PREDICTED: nuclear transport factor 2-like [Solanum lycopersicum]
Solyc12g056610	51.2866	136.738	1.41476	0.00172845	0.0305764	K09841|1|7e-55|211|osa:4334535|xanthoxin dehydrogenase [EC:1.1.1.288];K13070|2|2e-54|210|osa:4335093|momilactone-A synthase [EC:1.1.1.295]	-	GO:0016491//oxidoreductase activity	GO:0008152//metabolic process	gi|460414479|ref|XP_004252598.1|/5.16207e-131/PREDICTED: zerumbone synthase-like [Solanum lycopersicum]
Solyc11g072980	66.8591	178.211	1.41439	0.000862237	0.0180759	K15397|1|2e-93|341|aly:ARALYDRAFT_887345|3-ketoacyl-CoA synthase [EC:2.3.1.-]	GO:0005576//extracellular region;GO:0016020//membrane;GO:0005783//endoplasmic reticulum	GO:0016747//transferase activity, transferring acyl groups other than amino-acyl groups	GO:0006633//fatty acid biosynthetic process;GO:0009409//response to cold;GO:0000038//very long-chain fatty acid metabolic process;GO:0042335//cuticle development;GO:0009416//response to light stimulus	gi|460411818|ref|XP_004251302.1|/0/PREDICTED: 3-ketoacyl-CoA synthase 3-like [Solanum lycopersicum]
Solyc06g072230	685.875	1827.01	1.41347	2.47e-05	0.00100834	-	-	-	-	gi|460391744|ref|XP_004241479.1|/1.00182e-114/PREDICTED: miraculin-like [Solanum lycopersicum]
Solyc01g100760	147.908	393.877	1.41304	0.000159657	0.00477057	-	GO:0048046//apoplast	-	GO:0010090//trichome morphogenesis	gi|460368947|ref|XP_004230326.1|/4.47859e-89/PREDICTED: uncharacterized protein LOC101254945 [Solanum lycopersicum]
Solyc03g098720	94.8674	252.501	1.4123	0.000394403	0.00986052	-	-	-	-	gi|460379319|ref|XP_004235411.1|/9.59634e-122/PREDICTED: trypsin inhibitor A-like [Solanum lycopersicum]
Solyc04g081240	41.3484	109.988	1.41145	0.0030248	0.0463768	K14486|1|0.0|1146|vvi:100254074|auxin response factor	GO:0016020//membrane;GO:0005634//nucleus	GO:0046983//protein dimerization activity;GO:0044212//transcription regulatory region DNA binding;GO:0042802//identical protein binding;GO:0003700//sequence-specific DNA binding transcription factor activity	GO:0031048//chromatin silencing by small RNA;GO:0006346//methylation-dependent chromatin silencing;GO:0016246//RNA interference;GO:0007155//cell adhesion;GO:0051567//histone H3-K9 methylation;GO:0009944//polarity specification of adaxial/abaxial axis;GO:0045010//actin nucleation;GO:0009734//auxin mediated signaling pathway;GO:0009855//determination of bilateral symmetry;GO:0009965//leaf morphogen…	gi|350539842|ref|NP_001234545.1|/0/auxin response factor 5 [Solanum lycopersicum]
Solyc06g035610	106.557	283.442	1.41142	0.000351976	0.00895101	K02965|1|1e-11|67.0|ath:AT5G47320|small subunit ribosomal protein S19;K13195|2|7e-10|60.8|pop:POPTR_712972|cold-inducible RNA-binding protein;K12891|3|1e-09|60.1|bdi:100826320|splicing factor, arginine/serine-rich 2;K14325|5|1e-09|60.1|osa:4337561|RNA-binding protein with serine-rich domain 1	GO:0005739//mitochondrion	GO:0003676//nucleic acid binding	-	gi|460390236|ref|XP_004240744.1|/7.38622e-78/PREDICTED: glycine-rich RNA-binding protein 2, mitochondrial-like [Solanum lycopersicum]
Solyc01g091370	102.199	271.282	1.40841	0.00040526	0.0100978	-	-	-	-	gi|460367918|ref|XP_004229817.1|/1.73883e-178/PREDICTED: uncharacterized protein LOC101253722 [Solanum lycopersicum]
Solyc06g075090	70.4172	186.738	1.40701	0.000999151	0.0202302	K06966|1|1e-88|323|vvi:100256973|	-	GO:0016787//hydrolase activity	-	gi|384081616|ref|NP_001244912.1|/1.31374e-105/cytokinin riboside 5'-monophosphate phosphoribohydrolase LOG8 [Solanum lycopersicum]
Solyc12g009930	852.251	2259.9	1.40691	3.25e-05	0.00125959	K13495|1|1e-85|315|pop:POPTR_808453|cis-zeatin O-glucosyltransferase [EC:2.4.1.215]	-	-	-	gi|460412719|ref|XP_004251745.1|/0/PREDICTED: zeatin O-glucosyltransferase-like isoform 2 [Solanum lycopersicum]
Solyc06g076080	3021.91	8012.71	1.40683	2.52e-05	0.00102499	-	-	-	-	-
Solyc04g005100	365.592	969.045	1.40633	5.83e-05	0.0020669	-	-	GO:0005488//binding	GO:0009753//response to jasmonic acid stimulus;GO:0009739//response to gibberellin stimulus;GO:0009651//response to salt stress;GO:0006355//regulation of transcription, DNA-dependent;GO:0009751//response to salicylic acid stimulus;GO:0009733//response to auxin stimulus;GO:0009737//response to abscisic acid stimulus;GO:0009723//response to ethylene stimulus;GO:0046686//response to cadmium ion;GO:0…	gi|460382696|ref|XP_004237073.1|/1.25195e-152/PREDICTED: transcription factor MYB1R1-like [Solanum lycopersicum]
Solyc08g080190	436.492	1156.9	1.40624	4.69e-05	0.00172614	K15403|1|0.0|645|bdi:100830847|fatty acid omega-hydroxy dehydrogenase [EC:1.1.-.-]	GO:0016023//cytoplasmic membrane-bounded vesicle;GO:0005576//extracellular region	GO:0050660//flavin adenine dinucleotide binding;GO:0008812//choline dehydrogenase activity;GO:0046593//mandelonitrile lyase activity	GO:0006066//alcohol metabolic process;GO:0055114//oxidation-reduction process	gi|460400271|ref|XP_004245659.1|/0/PREDICTED: protein HOTHEAD-like [Solanum lycopersicum]
Solyc02g069680	42.9961	113.856	1.40494	0.00286616	0.0444741	K12192|1|4e-83|305|gmx:100499888|charged multivesicular body protein 2B	GO:0000815//ESCRT III complex;GO:0005634//nucleus	GO:0005515//protein binding	GO:0000911//cytokinesis by cell plate formation;GO:0016192//vesicle-mediated transport;GO:0016572//histone phosphorylation;GO:0006260//DNA replication;GO:0051567//histone H3-K9 methylation;GO:0000226//microtubule cytoskeleton organization;GO:0008283//cell proliferation;GO:0006306//DNA methylation;GO:0015031//protein transport	gi|460376202|ref|XP_004233888.1|/7.11708e-110/PREDICTED: uncharacterized protein LOC101265799 [Solanum lycopersicum]
Solyc09g007730	70.5213	186.682	1.40445	0.00118471	0.0229768	K04733|1|1e-66|251|smo:SELMODRAFT_159261|interleukin-1 receptor-associated kinase 4 [EC:2.7.11.1];K13430|4|9e-62|235|aly:ARALYDRAFT_909268|serine/threonine-protein kinase PBS1 [EC:2.7.11.1]	-	GO:0005524//ATP binding;GO:0004674//protein serine/threonine kinase activity	GO:0006468//protein phosphorylation	gi|460402323|ref|XP_004246662.1|/0/PREDICTED: putative serine/threonine-protein kinase-like [Solanum lycopersicum]
Solyc04g007200	51.18	135.385	1.40342	0.0019605	0.033662	-	-	GO:0047617//acyl-CoA hydrolase activity	GO:0019344//cysteine biosynthetic process	gi|300836830|gb|ADK38542.1|/1.24114e-115/methylketone synthase IIb [Solanum lycopersicum]
Solyc08g083400	42.6765	112.886	1.40335	0.00316508	0.0478664	K09287|1|5e-44|176|vvi:100262843|RAV-like factor	-	-	GO:0009908//flower development;GO:0048366//leaf development	gi|460401131|ref|XP_004246082.1|/1.70636e-171/PREDICTED: B3 domain-containing transcription factor NGA1-like [Solanum lycopersicum]
Solyc08g067300	123.778	327.263	1.4027	0.000274282	0.00736317	-	-	GO:0016874//ligase activity	GO:0006511//ubiquitin-dependent protein catabolic process	gi|460399357|ref|XP_004245208.1|/0/PREDICTED: F-box only protein 13-like [Solanum lycopersicum]
Solyc08g076820	651.78	1722.94	1.40242	4.13e-05	0.00154331	K13422|1|3e-14|77.4|mtr:MTR_5g030430|transcription factor MYC2	GO:0005634//nucleus	GO:0046983//protein dimerization activity	-	gi|365222874|gb|AEW69789.1|/0/Hop-interacting protein THI018 [Solanum lycopersicum]
Solyc09g097800	146.367	386.469	1.40076	0.000186037	0.00540602	-	-	-	-	gi|270313164|gb|ACZ73649.1|/2.6262e-07/glycine-rich protein precursor [Nicotiana tabacum]
Solyc01g104950	7267.73	19183.9	1.40032	2.46e-05	0.00100438	K15920|1|0.0|1164|rcu:RCOM_1752040|beta-D-xylosidase 4 [EC:3.2.1.37]	GO:0005618//cell wall;GO:0048046//apoplast	GO:0009044//xylan 1,4-beta-xylosidase activity;GO:0008422//beta-glucosidase activity	GO:0045493//xylan catabolic process	gi|460369393|ref|XP_004230547.1|/0/PREDICTED: beta-xylosidase/alpha-L-arabinofuranosidase 2 [Solanum lycopersicum]
Solyc09g075810	362.522	956.347	1.39947	4.91e-05	0.00179165	-	GO:0005886//plasma membrane;GO:0031225//anchored to membrane	GO:0005507//copper ion binding	GO:0045492//xylan biosynthetic process;GO:0010413//glucuronoxylan metabolic process	gi|460403794|ref|XP_004247371.1|/2.49003e-103/PREDICTED: mavicyanin-like [Solanum lycopersicum]
Solyc04g074430	4281.79	11292.8	1.39911	2.12e-05	0.000890843	-	GO:0009505//plant-type cell wall;GO:0005794//Golgi apparatus;GO:0005576//extracellular region;GO:0005829//cytosol	-	GO:0009741//response to brassinosteroid stimulus;GO:0016126//sterol biosynthetic process	gi|460384466|ref|XP_004237932.1|/1.08495e-60/PREDICTED: uncharacterized protein LOC101261020 isoform 1 [Solanum lycopersicum]
Solyc01g065500	61.864	163.136	1.3989	0.00113286	0.0221841	-	GO:0009506//plasmodesma;GO:0005886//plasma membrane;GO:0005634//nucleus;GO:0005829//cytosol;GO:0005783//endoplasmic reticulum	-	GO:0010075//regulation of meristem growth;GO:0010014//meristem initiation;GO:0009944//polarity specification of adaxial/abaxial axis;GO:0009855//determination of bilateral symmetry	gi|460366834|ref|XP_004229283.1|/0/PREDICTED: uncharacterized protein LOC101268027 [Solanum lycopersicum]
Solyc01g066760	53.358	140.555	1.39736	0.00203169	0.0345902	-	GO:0016020//membrane	-	-	gi|460366758|ref|XP_004229246.1|/5.8406e-30/PREDICTED: uncharacterized protein LOC101255730 [Solanum lycopersicum]
Solyc01g079830	112.615	296.598	1.3971	0.000375638	0.00946598	-	-	-	-	gi|460367122|ref|XP_004229424.1|/8.95294e-71/PREDICTED: uncharacterized protein LOC101251812 [Solanum lycopersicum]
Solyc06g069790	872.66	2297.25	1.39642	3.63e-05	0.0013717	-	-	-	GO:0009739//response to gibberellin stimulus;GO:0045454//cell redox homeostasis	gi|460391953|ref|XP_004241582.1|/1.66694e-61/PREDICTED: gibberellin-regulated protein 6-like [Solanum lycopersicum]
Solyc09g092580	59.1509	155.677	1.39608	0.00159741	0.0289267	K11818|1|1e-130|464|aly:ARALYDRAFT_913321|cytochrome P450, family 83, subfamily B, polypeptide 1 [EC:1.14.-.-];K00517|3|2e-126|450|ath:AT5G57260|[EC:1.14.-.-]	GO:0016020//membrane;GO:0043231//intracellular membrane-bounded organelle;GO:0044444//cytoplasmic part	GO:0046872//metal ion binding;GO:0016709//oxidoreductase activity, acting on paired donors, with incorporation or reduction of molecular oxygen, NAD(P)H as one donor, and incorporation of one atom of oxygen	GO:0009639//response to red or far red light;GO:0046394;GO:0042742//defense response to bacterium;GO:0019761//glucosinolate biosynthetic process;GO:0042435//indole-containing compound biosynthetic process	gi|460404867|ref|XP_004247901.1|/0/PREDICTED: cytochrome P450 83B1-like [Solanum lycopersicum]
Solyc04g012060	202.864	533.513	1.39501	0.000109656	0.00350396	K10807|1|0.0|1511|gmx:548020|ribonucleoside-diphosphate reductase subunit M1 [EC:1.17.4.1]	GO:0005971//ribonucleoside-diphosphate reductase complex	GO:0005524//ATP binding;GO:0004748//ribonucleoside-diphosphate reductase activity, thioredoxin disulfide as acceptor	GO:0055114//oxidation-reduction process;GO:0009202//deoxyribonucleoside triphosphate biosynthetic process;GO:0006260//DNA replication;GO:0046686//response to cadmium ion	gi|460381961|ref|XP_004236709.1|/0/PREDICTED: ribonucleoside-diphosphate reductase large subunit-like [Solanum lycopersicum]
Solyc05g051200	155.559	409.016	1.39469	0.000194468	0.00559247	K14516|1|4e-43|172|rcu:RCOM_1007740|ethylene-responsive transcription factor 1	GO:0005634//nucleus	GO:0003677//DNA binding;GO:0003700//sequence-specific DNA binding transcription factor activity	GO:0006952//defense response;GO:0006355//regulation of transcription, DNA-dependent;GO:0009835//fruit ripening;GO:0009873//ethylene mediated signaling pathway	gi|350538151|ref|NP_001234841.1|/9.43183e-126/ethylene-responsive factor 1 [Solanum lycopersicum]
Solyc02g086700	51.4996	135.33	1.39385	0.00195297	0.0335588	-	GO:0005576//extracellular region	GO:0004553//hydrolase activity, hydrolyzing O-glycosyl compounds	GO:0008152//metabolic process	gi|460372991|ref|XP_004232306.1|/0/PREDICTED: glucan endo-1,3-beta-glucosidase-like [Solanum lycopersicum]
Solyc01g007010	215.615	566.458	1.39351	0.000119911	0.0037761	-	GO:0000151//ubiquitin ligase complex	GO:0004842//ubiquitin-protein ligase activity	GO:0016567//protein ubiquitination	gi|460365604|ref|XP_004228691.1|/0/PREDICTED: E3 ubiquitin-protein ligase PUB22-like [Solanum lycopersicum]
Solyc11g018800	4672.93	12269.1	1.39263	2.37e-05	0.000973188	K00430|1|2e-128|456|rcu:RCOM_0774930|peroxidase [EC:1.11.1.7]	-	GO:0020037//heme binding;GO:0046872//metal ion binding;GO:0004601//peroxidase activity	GO:0055114//oxidation-reduction process;GO:0006979//response to oxidative stress	gi|460409955|ref|XP_004250402.1|/4.16003e-180/PREDICTED: lignin-forming anionic peroxidase-like [Solanum lycopersicum]
Solyc04g015360	1335.39	3505.37	1.3923	3.53e-05	0.00134604	-	-	GO:0005488//binding	-	gi|460381805|ref|XP_004236632.1|/0/PREDICTED: GATA transcription factor 9-like [Solanum lycopersicum]
Solyc08g078650	64.6787	169.731	1.39189	0.00126918	0.024228	K00750|1|1e-13|76.3|rcu:RCOM_0138290|glycogenin glucosyltransferase [EC:2.4.1.186]	GO:0005739//mitochondrion	GO:0016758//transferase activity, transferring hexosyl groups	GO:0016051//carbohydrate biosynthetic process	gi|460400487|ref|XP_004245766.1|/0/PREDICTED: putative glucuronosyltransferase PGSIP8-like [Solanum lycopersicum]
Solyc10g055230	57.9294	151.835	1.39013	0.00164781	0.0294751	-	-	-	-	gi|460406419|ref|XP_004248662.1|/7.35301e-103/PREDICTED: disease resistance response protein 206-like [Solanum lycopersicum]
Solyc01g021600	82.1617	215.33	1.39001	0.000853608	0.0179889	-	-	-	-	gi|460364870|ref|XP_004228335.1|/4.99686e-130/PREDICTED: disease resistance response protein 206-like [Solanum lycopersicum]
Solyc01g106830	207.961	544.959	1.38983	0.000134698	0.0041476	-	-	-	-	gi|460369674|ref|XP_004230682.1|/1.56046e-43/PREDICTED: phytosulfokines 5-like [Solanum lycopersicum]
Solyc05g049980	146.949	385.023	1.38962	0.000230307	0.00638332	K01184|1|2e-26|119|ath:AT5G17200|polygalacturonase [EC:3.2.1.15]	GO:0005576//extracellular region	GO:0004650//polygalacturonase activity	GO:0005975//carbohydrate metabolic process	gi|460388891|ref|XP_004240097.1|/0/PREDICTED: probable polygalacturonase-like [Solanum lycopersicum]
Solyc06g069550	46.7152	122.217	1.38748	0.00294723	0.04547	K00012|1|0.0|884|vvi:100264653|UDPglucose 6-dehydrogenase [EC:1.1.1.22]	-	GO:0051287//NAD binding;GO:0003979//UDP-glucose 6-dehydrogenase activity	GO:0055114//oxidation-reduction process	gi|460391985|ref|XP_004241598.1|/0/PREDICTED: UDP-glucose 6-dehydrogenase-like [Solanum lycopersicum]
Solyc10g075090	3896.2	10170.9	1.38431	2.94e-05	0.00115584	-	-	GO:0008289//lipid binding	GO:0006950//response to stress;GO:0006869//lipid transport	gi|350535717|ref|NP_001233953.1|/4.43306e-62/non-specific lipid-transfer protein 2 precursor [Solanum lycopersicum]
Solyc01g099410	1072.62	2799.43	1.38399	3.2e-05	0.00124035	K11251|1|4e-66|247|mtr:MTR_2g096570|histone H2A	GO:0000786//nucleosome;GO:0005730//nucleolus	GO:0003677//DNA binding;GO:0046982//protein heterodimerization activity	GO:0006334//nucleosome assembly	gi|122003|sp|P25469.1|H2A1_SOLLC/6.86011e-76/RecName: Full=Histone H2A.1; AltName: Full=LeH2A-1
Solyc09g084460	55.0057	143.427	1.38267	0.00211051	0.0353943	-	GO:0005576//extracellular region	GO:0004867//serine-type endopeptidase inhibitor activity;GO:0008233//peptidase activity	GO:0009611//response to wounding;GO:0010466//negative regulation of peptidase activity;GO:0006508//proteolysis	gi|460404369|ref|XP_004247655.1|/2.27847e-58/PREDICTED: wound-induced proteinase inhibitor 1-like [Solanum lycopersicum]
Solyc03g095780	58.14	151.452	1.38126	0.00206598	0.0349596	K14496|1|8e-74|274|vvi:100267073|abscisic acid receptor PYR/PYL family	-	-	GO:0009738//abscisic acid mediated signaling pathway	gi|460378955|ref|XP_004235232.1|/3.48521e-115/PREDICTED: abscisic acid receptor PYL4-like [Solanum lycopersicum]
Solyc09g082270	114.32	297.606	1.38033	0.000354199	0.00899722	-	-	-	-	gi|460404206|ref|XP_004247575.1|/1.28439e-91/PREDICTED: non-specific lipid-transfer protein-like protein At2g13820-like [Solanum lycopersicum]
Solyc10g051120	102.893	267.589	1.37888	0.000461492	0.0112342	-	GO:0005739//mitochondrion;GO:0005886//plasma membrane	-	-	gi|460406559|ref|XP_004248730.1|/3.13179e-52/PREDICTED: mitochondrial pyruvate carrier 1-like isoform 2 [Solanum lycopersicum]
Solyc04g079560	106.664	276.962	1.37662	0.000496218	0.0118841	K15015|1|4e-12|71.2|vcn:VOLCADRAFT_66446|solute carrier family 32 (vesicular inhibitory amino acid transporter);K13946|5|2e-09|62.4|ppp:PHYPADRAFT_148519|auxin influx carrier (AUX1 LAX family)	GO:0005886//plasma membrane;GO:0016021//integral to membrane	GO:0015171//amino acid transmembrane transporter activity	GO:0010075//regulation of meristem growth;GO:0006865//amino acid transport	gi|460385005|ref|XP_004238196.1|/0/PREDICTED: lysine histidine transporter-like 8-like [Solanum lycopersicum]
Solyc11g040040	69.1436	179.5	1.37631	0.00118868	0.0230077	-	-	-	-	gi|460410561|ref|XP_004250695.1|/0/PREDICTED: BTB/POZ domain-containing protein At3g19850-like [Solanum lycopersicum]
Solyc07g018300	56.1752	145.729	1.37528	0.0020802	0.0350665	K10739|1|8e-88|321|vvi:100254758|replication factor A2	GO:0005634//nucleus	GO:0005515//protein binding	GO:0000911//cytokinesis by cell plate formation;GO:0010389//regulation of G2/M transition of mitotic cell cycle;GO:0009909//regulation of flower development;GO:0000724//double-strand break repair via homologous recombination;GO:0016444//somatic cell DNA recombination;GO:0051567//histone H3-K9 methylation;GO:0031047//gene silencing by RNA;GO:0009555//pollen development;GO:0006270//DNA replication …	gi|460394678|ref|XP_004242927.1|/9.78147e-153/PREDICTED: replication protein A 32 kDa subunit A-like [Solanum lycopersicum]
Solyc06g075690	2182.08	5660.58	1.37524	3.53e-05	0.00134604	-	GO:0005886//plasma membrane	-	-	gi|350539181|ref|NP_001234635.1|/0/auxin-regulated protein [Solanum lycopersicum]
Solyc01g087980	577.549	1497.43	1.37447	5.21e-05	0.00188279	-	-	-	-	gi|462415171|gb|EMJ19908.1|/1.52294e-52/hypothetical protein PRUPE_ppa008924mg [Prunus persica]
Solyc06g072660	58.5686	151.813	1.3741	0.00163474	0.0292922	K15400|1|5e-136|483|vvi:100245819|omega-hydroxypalmitate O-feruloyl transferase [EC:2.3.1.188];K11294|2|1e-16|86.7|vvi:100262769|nucleolin;K03243|4|1e-13|76.6|sbi:SORBI_09g030590|translation initiation factor 5B	-	-	GO:0010048//vernalization response	gi|460391686|ref|XP_004241450.1|/0/PREDICTED: uncharacterized protein LOC101264938 [Solanum lycopersicum]
Solyc04g011750	66.1678	171.152	1.37108	0.00134463	0.025277	K11647|1|8e-07|50.1|smo:SELMODRAFT_102849|SWI/SNF-related matrix-associated actin-dependent regulator of chromatin subfamily A member 2/4 [EC:3.6.4.-]	-	-	-	gi|460381992|ref|XP_004236724.1|/3.92307e-55/PREDICTED: uncharacterized protein LOC101253883 [Solanum lycopersicum]
Solyc08g042100	56.0166	144.789	1.37002	0.00204362	0.0347056	K08332|1|1e-17|89.7|vcn:VOLCADRAFT_41528|vacuolar protein 8	-	-	-	gi|460398822|ref|XP_004244950.1|/0/PREDICTED: U-box domain-containing protein 4-like [Solanum lycopersicum]
Solyc11g064800	106.557	274.468	1.36501	0.000562196	0.0130421	-	-	GO:0042803//protein homodimerization activity	GO:0010090//trichome morphogenesis;GO:0071555//cell wall organization;GO:0009733//response to auxin stimulus;GO:0007155//cell adhesion;GO:0048765//root hair cell differentiation;GO:0045010//actin nucleation	gi|460411910|ref|XP_004251347.1|/0/PREDICTED: uncharacterized protein LOC101254271 [Solanum lycopersicum]
Solyc03g097750	91.0938	234.188	1.36224	0.000713266	0.015632	K13250|1|1e-54|210|vvi:100241257|translocon-associated protein subunit beta	GO:0005794//Golgi apparatus;GO:0009506//plasmodesma;GO:0005774//vacuolar membrane;GO:0005576//extracellular region;GO:0005783//endoplasmic reticulum	-	GO:0009627//systemic acquired resistance;GO:0034976//response to endoplasmic reticulum stress	gi|460379170|ref|XP_004235337.1|/6.26748e-103/PREDICTED: translocon-associated protein subunit beta-like [Solanum lycopersicum]
Solyc12g044630	81.79	210.178	1.36161	0.00110078	0.0217423	K05759|1|1e-65|245|gmx:100784770|profilin	GO:0005856//cytoskeleton;GO:0005737//cytoplasm	GO:0004350//glutamate-5-semialdehyde dehydrogenase activity;GO:0003779//actin binding;GO:0050661//NADP binding;GO:0004349//glutamate 5-kinase activity	GO:0055114//oxidation-reduction process;GO:0030036//actin cytoskeleton organization;GO:0016310//phosphorylation;GO:0006561//proline biosynthetic process	gi|350539215|ref|NP_001233869.1|/5.90391e-75/profilin-1 [Solanum lycopersicum]
Solyc03g116460	72.3324	185.742	1.36058	0.00124185	0.0238291	-	GO:0009507//chloroplast	GO:0036361//racemase activity, acting on amino acids and derivatives;GO:0009055//electron carrier activity;GO:0004497//monooxygenase activity;GO:0005506//iron ion binding;GO:0020037//heme binding;GO:0016705//oxidoreductase activity, acting on paired donors, with incorporation or reduction of molecular oxygen	GO:0006520//cellular amino acid metabolic process;GO:0055114//oxidation-reduction process	gi|460380545|ref|XP_004236016.1|/1.60967e-153/PREDICTED: uncharacterized protein LOC101243975 isoform 1 [Solanum lycopersicum]
Solyc06g065190	190.419	488.638	1.35959	0.000246582	0.00672527	K01501|1|2e-06|51.6|rcu:RCOM_1258620|nitrilase [EC:3.5.5.1]	-	-	-	gi|350539617|ref|NP_001233966.1|/0/TCP transcription factor 13 [Solanum lycopersicum]
Solyc08g079870	3182.26	8165.36	1.35946	3.85e-05	0.00144774	K08653|1|3e-09|62.4|bdi:100822086|membrane-bound transcription factor site-1 protease [EC:3.4.21.112]	-	GO:0042802//identical protein binding;GO:0004252//serine-type endopeptidase activity	GO:0043086//negative regulation of catalytic activity;GO:0006508//proteolysis	gi|350536267|ref|NP_001233982.1|/0/subtilisin-like protease precursor [Solanum lycopersicum]
Solyc02g082100	145.195	372.467	1.35912	0.000333017	0.00854718	K01931|1|2e-31|136|pop:POPTR_879783|protein neuralized [EC:6.3.2.19];K15688|4|5e-06|52.4|bdi:100835811|E3 ubiquitin-protein ligase MUL1 [EC:6.3.2.19]	-	-	-	gi|460373606|ref|XP_004232606.1|/0/PREDICTED: uncharacterized protein LOC101246588 [Solanum lycopersicum]
Solyc07g052980	6995.24	17935.2	1.35835	3.54e-05	0.00134604	K08235|1|1e-144|510|vvi:100248328|xyloglucan:xyloglucosyl transferase [EC:2.4.1.207]	GO:0048046//apoplast;GO:0005618//cell wall	GO:0004553//hydrolase activity, hydrolyzing O-glycosyl compounds;GO:0016762//xyloglucan:xyloglucosyl transferase activity	GO:0006073//cellular glucan metabolic process	gi|460395726|ref|XP_004243432.1|/3.70575e-180/PREDICTED: xyloglucan endotransglucosylase/hydrolase protein 9 [Solanum lycopersicum]
Solyc07g014730	167.941	430.261	1.35726	0.00027788	0.00744176	K01047|1|4e-48|188|aly:ARALYDRAFT_899432|phospholipase A2 [EC:3.1.1.4]	GO:0005773//vacuole;GO:0005794//Golgi apparatus;GO:0005576//extracellular region	GO:0004623//phospholipase A2 activity	GO:0016042//lipid catabolic process;GO:0006644//phospholipid metabolic process	gi|460394579|ref|XP_004242879.1|/1.32896e-89/PREDICTED: phospholipase A2-alpha-like [Solanum lycopersicum]
Solyc06g074990	87.4243	223.836	1.35633	0.000949423	0.0194627	K02575|1|0.0|738|rcu:RCOM_1355110|MFS transporter, NNP family, nitrate/nitrite transporter	GO:0016021//integral to membrane	-	GO:0048527//lateral root development;GO:0015706//nitrate transport;GO:0055085//transmembrane transport;GO:0010167//response to nitrate	gi|460391349|ref|XP_004241285.1|/0/PREDICTED: LOW QUALITY PROTEIN: high-affinity nitrate transporter 2.1-like [Solanum lycopersicum]
Solyc02g081690	61.7599	157.983	1.35503	0.00141084	0.026299	K08237|1|3e-68|257|aly:ARALYDRAFT_490463|hydroquinone glucosyltransferase [EC:2.4.1.218]	-	GO:0016758//transferase activity, transferring hexosyl groups	-	gi|460373679|ref|XP_004232642.1|/0/PREDICTED: UDP-glucose flavonoid 3-O-glucosyltransferase 6-like [Solanum lycopersicum]
Solyc09g055940	205.357	525.161	1.35463	0.000202856	0.00579616	K03453|1|1e-141|501|osa:4329356|bile acid:Na+ symporter, BASS family	GO:0009941//chloroplast envelope;GO:0016021//integral to membrane	GO:0008508//bile acid:sodium symporter activity	GO:0006814//sodium ion transport	gi|460403073|ref|XP_004247027.1|/0/PREDICTED: probable sodium/metabolite cotransporter BASS3, chloroplastic-like [Solanum lycopersicum]
Solyc02g063440	53.7321	137.206	1.35249	0.00242591	0.0391864	-	-	-	-	gi|224118124|ref|XP_002317737.1|/1.37756e-31/predicted protein [Populus trichocarpa]
Solyc01g108440	294.642	749.894	1.34772	0.000143801	0.0043974	-	GO:0005886//plasma membrane	-	-	gi|460371144|ref|XP_004231405.1|/7.10089e-167/PREDICTED: uncharacterized protein LOC101262366 [Solanum lycopersicum]
Solyc02g089730	68.1872	173.531	1.34762	0.00157204	0.0286072	K01057|1|2e-24|112|gmx:100804571|6-phosphogluconolactonase [EC:3.1.1.31]	-	GO:0052862//glucan endo-1,4-beta-glucanase activity, C-3 substituted reducing group;GO:0052861//glucan endo-1,3-beta-glucanase activity, C-3 substituted reducing group	GO:0016998//cell wall macromolecule catabolic process	gi|460372570|ref|XP_004232102.1|/0/PREDICTED: endo-1,3(4)-beta-glucanase 1-like [Solanum lycopersicum]
Solyc03g026280	1585.93	4030.45	1.34561	5.84e-05	0.0020669	K09286|1|9e-61|231|ath:AT4G25480|EREBP-like factor	GO:0005634//nucleus	GO:0003700//sequence-specific DNA binding transcription factor activity;GO:0003677//DNA binding	GO:0006355//regulation of transcription, DNA-dependent	gi|350539177|ref|NP_001234123.1|/1.41856e-117/CBF1 protein [Solanum lycopersicum]
Solyc08g022240	63.7223	161.719	1.34362	0.00196666	0.0337417	K01058|1|2e-73|275|mtr:MTR_7g081620|phospholipase A1 [EC:3.1.1.32]	GO:0005739//mitochondrion	GO:0008970//phosphatidylcholine 1-acylhydrolase activity;GO:0004806//triglyceride lipase activity	GO:0006629//lipid metabolic process;GO:0010214//seed coat development	gi|460398633|ref|XP_004244860.1|/0/PREDICTED: phospholipase A1-Igamma1, chloroplastic-like [Solanum lycopersicum]
Solyc03g123680	590.035	1495.46	1.34171	8.08e-05	0.00272755	K05283|1|3e-15|80.1|aly:ARALYDRAFT_354960|phosphatidylinositol glycan, class W [EC:2.3.-.-];K11982|2|1e-10|64.7|sbi:SORBI_03g011120|E3 ubiquitin-protein ligase RNF115/126 [EC:6.3.2.19];K15692|5|3e-09|60.1|sbi:SORBI_06g034040|E3 ubiquitin-protein ligase RNF13 [EC:6.3.2.19]	-	-	-	gi|460379545|ref|XP_004235522.1|/3.2176e-138/PREDICTED: RING-H2 finger protein ATL3-like [Solanum lycopersicum]
Solyc03g097380	428.834	1083.74	1.33753	0.000119878	0.0037761	K07213|1|2e-11|68.6|gmx:547569|copper chaperone	GO:0005886//plasma membrane	GO:0046914//transition metal ion binding	GO:0009616//virus induced gene silencing;GO:0010050//vegetative phase change;GO:0046916//cellular transition metal ion homeostasis	gi|460379132|ref|XP_004235318.1|/0/PREDICTED: uncharacterized protein LOC101258837 [Solanum lycopersicum]
Solyc11g071990	79.0273	199.31	1.33459	0.00142963	0.0265601	K03885|1|2e-11|68.2|aly:ARALYDRAFT_911770|NADH dehydrogenase [EC:1.6.99.3]	GO:0009506//plasmodesma;GO:0005794//Golgi apparatus;GO:0005886//plasma membrane	GO:0009055//electron carrier activity;GO:0016491//oxidoreductase activity;GO:0050660//flavin adenine dinucleotide binding	GO:0042744//hydrogen peroxide catabolic process;GO:0055114//oxidation-reduction process;GO:0010200//response to chitin;GO:0046482//para-aminobenzoic acid metabolic process;GO:0010583//response to cyclopentenone;GO:0009407//toxin catabolic process	gi|460411671|ref|XP_004251229.1|/0/PREDICTED: apoptosis-inducing factor homolog B-like [Solanum lycopersicum]
Solyc06g069000	162.098	408.514	1.33352	0.000328983	0.00847302	-	-	-	-	gi|460392063|ref|XP_004241637.1|/0/PREDICTED: uncharacterized GPI-anchored protein At4g28100-like [Solanum lycopersicum]
Solyc10g054110	211.306	532.442	1.33329	0.000275258	0.00738045	-	GO:0005739//mitochondrion;GO:0009941//chloroplast envelope;GO:0005886//plasma membrane	GO:0015238//drug transmembrane transporter activity;GO:0015297//antiporter activity	GO:0031348//negative regulation of defense response;GO:0006855//drug transmembrane transport;GO:0009624//response to nematode;GO:0009697//salicylic acid biosynthetic process	gi|460406480|ref|XP_004248692.1|/0/PREDICTED: MATE efflux family protein 4, chloroplastic-like [Solanum lycopersicum]
Solyc07g062550	126.592	318.753	1.33225	0.000597591	0.0136916	K00800|1|3e-10|65.5|gmx:100789268|3-phosphoshikimate 1-carboxyvinyltransferase [EC:2.5.1.19]	-	GO:0016765//transferase activity, transferring alkyl or aryl (other than methyl) groups	GO:0044238//primary metabolic process;GO:0019438//aromatic compound biosynthetic process;GO:0006793//phosphorus metabolic process;GO:1901362;GO:0006807//nitrogen compound metabolic process;GO:0044281//small molecule metabolic process	gi|460397428|ref|XP_004244269.1|/0/PREDICTED: UDP-N-acetylglucosamine 1-carboxyvinyltransferase 2-like [Solanum lycopersicum]
Solyc10g055200	2162.32	5443.06	1.33184	5.96e-05	0.00209696	-	-	-	-	gi|460406421|ref|XP_004248663.1|/9.46677e-107/PREDICTED: uncharacterized protein LOC101250259 [Solanum lycopersicum]
Solyc10g076500	217.104	546.406	1.33159	0.000232106	0.00642517	K13420|1|3e-64|245|aly:ARALYDRAFT_356368|LRR receptor-like serine/threonine-protein kinase FLS2 [EC:2.7.11.1];K13415|5|3e-61|235|pop:POPTR_650846|protein brassinosteroid insensitive 1 [EC:2.7.10.1 2.7.11.1]	-	-	-	gi|460408569|ref|XP_004249716.1|/0/PREDICTED: receptor-like protein 12-like [Solanum lycopersicum]
Solyc05g010020	509.132	1279.22	1.32915	0.000125967	0.00393979	-	-	-	-	-
Solyc06g074110	57.6618	144.81	1.32847	0.00321668	0.0484487	-	-	-	-	gi|460393029|ref|XP_004242114.1|/0/PREDICTED: transcription factor LHW-like [Solanum lycopersicum]
Solyc07g005100	412.577	1035.28	1.32729	0.00012508	0.00392217	K01183|1|6e-122|435|rcu:RCOM_0701150|chitinase [EC:3.2.1.14]	GO:0005618//cell wall	GO:0008843//endochitinase activity;GO:0035885//exochitinase activity	GO:0009753//response to jasmonic acid stimulus;GO:0006032//chitin catabolic process;GO:0009737//response to abscisic acid stimulus;GO:0009651//response to salt stress	gi|460393933|ref|XP_004242562.1|/0/PREDICTED: chitotriosidase-1-like [Solanum lycopersicum]
Solyc04g079930	103.477	258.985	1.32355	0.000777666	0.0166973	-	GO:0005634//nucleus	-	-	gi|460385060|ref|XP_004238223.1|/4.23376e-126/PREDICTED: uncharacterized protein LOC101249354 [Solanum lycopersicum]
Solyc07g054900	222.208	555.647	1.32226	0.00023405	0.00646287	K08233|1|3e-53|206|ath:AT2G23610|polyneuridine-aldehyde esterase [EC:3.1.1.78]	-	-	-	gi|460395452|ref|XP_004243297.1|/5.3165e-148/PREDICTED: polyneuridine-aldehyde esterase-like isoform 1 [Solanum lycopersicum]
Solyc01g091490	263.658	658.798	1.32117	0.000218792	0.00617504	-	GO:0005739//mitochondrion	GO:0005515//protein binding	GO:0010075//regulation of meristem growth;GO:0010014//meristem initiation;GO:0009944//polarity specification of adaxial/abaxial axis;GO:0010358//leaf shaping;GO:0009855//determination of bilateral symmetry	gi|460367934|ref|XP_004229825.1|/7.77699e-59/PREDICTED: uncharacterized protein LOC101256125 [Solanum lycopersicum]
Solyc01g079400	83.7597	209.212	1.32063	0.00123859	0.0238077	-	-	-	-	gi|460367046|ref|XP_004229386.1|/0/PREDICTED: uncharacterized protein LOC101266450 [Solanum lycopersicum]
Solyc09g007910	1757.34	4387.76	1.32009	7.25e-05	0.00249196	K10775|1|0.0|1213|rcu:RCOM_1355480|phenylalanine ammonia-lyase [EC:4.3.1.24]	GO:0005737//cytoplasm	GO:0045548//phenylalanine ammonia-lyase activity	GO:0009800//cinnamic acid biosynthetic process;GO:0006559//L-phenylalanine catabolic process	gi|460402299|ref|XP_004246651.1|/0/PREDICTED: phenylalanine ammonia-lyase-like [Solanum lycopersicum]
Solyc07g052440	69.3591	173.016	1.31874	0.00160725	0.0289933	-	GO:0005634//nucleus	-	-	gi|460395792|ref|XP_004243465.1|/3.22558e-90/PREDICTED: transmembrane protein 97-like [Solanum lycopersicum]
Solyc10g075150	1723.72	4292.66	1.31635	6.83e-05	0.00237856	-	-	-	GO:0006810//transport	gi|460407218|ref|XP_004249051.1|/3.37341e-62/PREDICTED: non-specific lipid-transfer protein 2-like isoform 2 [Solanum lycopersicum]
Solyc07g056470	85.566	212.883	1.31495	0.00129837	0.0246368	K00799|1|4e-88|322|gmx:547936|glutathione S-transferase [EC:2.5.1.18]	-	GO:0004364//glutathione transferase activity;GO:0004601//peroxidase activity	-	gi|460395247|ref|XP_004243196.1|/2.55084e-128/PREDICTED: probable glutathione S-transferase-like [Solanum lycopersicum]
Solyc08g081780	66.4354	165.063	1.313	0.00193861	0.0334155	-	-	-	-	gi|460400061|ref|XP_004245554.1|/1.11719e-109/PREDICTED: disease resistance response protein 206-like [Solanum lycopersicum]
Solyc01g088610	2181.98	5410.24	1.31005	7.74e-05	0.00263161	-	GO:0009941//chloroplast envelope;GO:0009570//chloroplast stroma	GO:0051087//chaperone binding	GO:0009684//indoleacetic acid biosynthetic process;GO:0006457//protein folding;GO:0006569//tryptophan catabolic process	gi|460367703|ref|XP_004229710.1|/8.75688e-71/PREDICTED: 20 kDa chaperonin, chloroplastic-like [Solanum lycopersicum]
Solyc07g006230	435.917	1079.76	1.30859	0.000127622	0.00396825	K11596|1|9e-16|80.1|cre:CHLREDRAFT_18730|argonaute;K01115|2|7e-15|77.0|vcn:VOLCADRAFT_99471|phospholipase D [EC:3.1.4.4]	-	-	-	gi|460394100|ref|XP_004242643.1|/2.67598e-67/PREDICTED: uncharacterized protein LOC101257976 [Solanum lycopersicum]
Solyc03g031420	235.704	583.393	1.30749	0.000279584	0.00745722	K15631|1|4e-16|84.7|rcu:RCOM_1575730|molybdenum cofactor sulfurtransferase [EC:2.8.1.9]	-	-	-	gi|460377368|ref|XP_004234465.1|/0/PREDICTED: molybdenum cofactor sulfurase-like [Solanum lycopersicum]
Solyc04g072740	209.239	517.621	1.30674	0.000305234	0.00801973	-	GO:0016021//integral to membrane	GO:0008271//secondary active sulfate transmembrane transporter activity	GO:0008272//sulfate transport;GO:0055085//transmembrane transport	gi|460384363|ref|XP_004237881.1|/0/PREDICTED: low affinity sulfate transporter 3-like [Solanum lycopersicum]
Solyc12g005340	3268.85	8074.9	1.30466	8.54e-05	0.00285128	K14494|1|4e-61|234|pop:POPTR_645273|DELLA protein	-	-	GO:0006355//regulation of transcription, DNA-dependent	gi|365222898|gb|AEW69801.1|/0/Hop-interacting protein THI039 [Solanum lycopersicum]
Solyc12g087790	160.713	396.898	1.30428	0.000514108	0.0122202	-	-	-	-	gi|460414717|ref|XP_004252710.1|/1.02132e-16/PREDICTED: uncharacterized protein LOC101246809 [Solanum lycopersicum]
Solyc11g019910	395.617	976.699	1.30381	0.000188906	0.00547506	K02355|1|3e-16|82.8|vvi:100257414|elongation factor G;K01051|2|1e-15|80.9|rcu:RCOM_0417480|pectinesterase [EC:3.1.1.11]	-	-	-	gi|460409959|ref|XP_004250403.1|/1.35529e-108/PREDICTED: 21 kDa protein-like [Solanum lycopersicum]
Solyc08g068600	361.93	892.819	1.30266	0.00018046	0.00530648	K01590|1|3e-156|550|rcu:RCOM_1170790|histidine decarboxylase [EC:4.1.1.22]	-	GO:0030170//pyridoxal phosphate binding;GO:0004398//histidine decarboxylase activity	GO:0019752//carboxylic acid metabolic process	gi|460399503|ref|XP_004245279.1|/0/PREDICTED: histidine decarboxylase-like [Solanum lycopersicum]
Solyc06g072220	773.394	1903.68	1.29952	0.000112038	0.00356355	-	-	-	-	gi|460391746|ref|XP_004241480.1|/2.79211e-121/PREDICTED: miraculin-like [Solanum lycopersicum]
Solyc04g077130	1226.75	3016.42	1.298	0.000124163	0.00389894	-	GO:0009507//chloroplast	-	-	gi|460384705|ref|XP_004238050.1|/1.47686e-57/PREDICTED: 50S ribosomal protein 6, chloroplastic-like [Solanum lycopersicum]
Solyc07g044960	157.046	386.099	1.29778	0.000568698	0.0131655	-	GO:0005794//Golgi apparatus	GO:0008378//galactosyltransferase activity	GO:0006007//glucose catabolic process;GO:0009969//xyloglucan biosynthetic process	gi|460396096|ref|XP_004243615.1|/0/PREDICTED: xyloglucan galactosyltransferase KATAMARI1 homolog [Solanum lycopersicum]
Solyc06g084090	173.694	425.737	1.29342	0.000316538	0.0082482	K11251|1|2e-65|246|osa:4331710|histone H2A	GO:0000786//nucleosome;GO:0005730//nucleolus	GO:0046982//protein heterodimerization activity;GO:0003677//DNA binding	GO:0016048//detection of temperature stimulus;GO:0001510//RNA methylation;GO:0008283//cell proliferation;GO:0042742//defense response to bacterium;GO:0048449//floral organ formation;GO:0006338//chromatin remodeling;GO:0044030//regulation of DNA methylation;GO:0009909//regulation of flower development;GO:0006334//nucleosome assembly;GO:0034968//histone lysine methylation	gi|460393500|ref|XP_004242347.1|/2.67783e-70/PREDICTED: probable histone H2A variant 3-like [Solanum lycopersicum]
Solyc09g014350	281.091	688.186	1.29176	0.000272667	0.00735518	K13508|1|0.0|819|pop:POPTR_835559|glycerol-3-phosphate acyltransferase [EC:2.3.1.15]	GO:0016020//membrane;GO:0005739//mitochondrion	GO:0016791//phosphatase activity;GO:0090447//glycerol-3-phosphate 2-O-acyltransferase activity;GO:0003841//1-acylglycerol-3-phosphate O-acyltransferase activity	GO:0010143//cutin biosynthetic process;GO:0009908//flower development;GO:0006655//phosphatidylglycerol biosynthetic process	gi|460401656|ref|XP_004246333.1|/0/PREDICTED: glycerol-3-phosphate 2-O-acyltransferase 6-like [Solanum lycopersicum]
Solyc02g091700	449.191	1099.09	1.29091	0.000191543	0.00552985	-	GO:0005634//nucleus;GO:0005886//plasma membrane	-	-	gi|460372301|ref|XP_004231969.1|/1.91902e-88/PREDICTED: uncharacterized protein At5g65660-like isoform 1 [Solanum lycopersicum]
Solyc06g007130	142.591	348.784	1.29045	0.000689053	0.0152216	K10257|1|3e-176|615|vvi:100243349|omega-3 fatty acid desaturase (delta-15 desaturase) [EC:1.14.19.-]	GO:0009941//chloroplast envelope;GO:0005783//endoplasmic reticulum	GO:0016720//delta12-fatty acid dehydrogenase activity;GO:0042389//omega-3 fatty acid desaturase activity;GO:0016717//oxidoreductase activity, acting on paired donors, with oxidation of a pair of donors resulting in the reduction of molecular oxygen to two molecules of water	GO:0009409//response to cold;GO:0006636//unsaturated fatty acid biosynthetic process;GO:0055114//oxidation-reduction process;GO:0080167//response to karrikin	gi|350537637|ref|NP_001233791.1|/0/omega-3 fatty acid desaturase [Solanum lycopersicum]
Solyc11g066430	552.465	1350.59	1.28964	0.000145346	0.00443735	K11252|1|5e-66|247|mtr:MTR_4g063200|histone H2B	GO:0000786//nucleosome;GO:0005634//nucleus	GO:0003677//DNA binding;GO:0046982//protein heterodimerization activity	GO:0006334//nucleosome assembly	gi|109892195|sp|O65818.2|H2B2_SOLLC/4.70852e-72/RecName: Full=Histone H2B.2; AltName: Full=LeH2B-2
Solyc06g076660	285.442	697.807	1.28963	0.000325136	0.00842593	K04802|1|5e-143|504|vvi:100248466|proliferating cell nuclear antigen	GO:0005730//nucleolus;GO:0043626//PCNA complex;GO:0005737//cytoplasm	GO:0030337//DNA polymerase processivity factor activity;GO:0003677//DNA binding	GO:0042276//error-prone translesion synthesis;GO:0006275//regulation of DNA replication	gi|350538217|ref|NP_001234844.1|/4.97609e-146/proliferating cell nuclear antigen [Solanum lycopersicum]
Solyc01g095690	81.951	200.229	1.28882	0.00191009	0.0329991	K15078|1|3e-116|418|vvi:100250139|structure-specific endonuclease subunit SLX1 [EC:3.6.1.-];K15271|5|6e-96|350|rcu:RCOM_1095670|ATP-dependent DNA helicase HFM1/MER3 [EC:3.6.4.12]	GO:0005739//mitochondrion	-	-	gi|460370743|ref|XP_004231209.1|/0/PREDICTED: pentatricopeptide repeat-containing protein At4g01030, mitochondrial-like [Solanum lycopersicum]
Solyc01g105800	286.136	698.142	1.28682	0.00031234	0.00816757	K09264|1|3e-33|140|smo:SELMODRAFT_450937|MADS-box transcription factor, plant	GO:0005634//nucleus	GO:0003700//sequence-specific DNA binding transcription factor activity;GO:0003677//DNA binding;GO:0046983//protein dimerization activity	GO:0006355//regulation of transcription, DNA-dependent	gi|460369548|ref|XP_004230624.1|/3.80329e-115/PREDICTED: MADS-box protein SVP-like [Solanum lycopersicum]
Solyc03g043770	70.7368	172.577	1.28671	0.0026987	0.0425445	K00924|1|1e-77|288|ath:AT1G75820|[EC:2.7.1.-]	GO:0016023//cytoplasmic membrane-bounded vesicle;GO:0016021//integral to membrane;GO:0005886//plasma membrane	GO:0032440//2-alkenal reductase [NAD(P)] activity;GO:0004709//MAP kinase kinase kinase activity;GO:0005524//ATP binding	GO:0009934//regulation of meristem structural organization;GO:0000186//activation of MAPKK activity;GO:0010480//microsporocyte differentiation;GO:0010075//regulation of meristem growth;GO:0055114//oxidation-reduction process;GO:0048229//gametophyte development	gi|460377726|ref|XP_004234641.1|/1.88334e-146/PREDICTED: leucine-rich repeat receptor-like serine/threonine-protein kinase BAM1-like [Solanum lycopersicum]
Solyc02g078570	105.232	256.598	1.28594	0.00105751	0.0211472	K01259|1|2e-06|51.6|smo:SELMODRAFT_103553|proline iminopeptidase [EC:3.4.11.5]	-	GO:0016787//hydrolase activity;GO:0016740//transferase activity	GO:0008152//metabolic process	gi|460374085|ref|XP_004232842.1|/0/PREDICTED: AB hydrolase superfamily protein YfhM-like isoform 1 [Solanum lycopersicum]
Solyc02g062460	74.2453	181.023	1.2858	0.00233419	0.0382163	K06892|1|7e-24|109|pop:POPTR_550478|;K05278|2|2e-23|108|mtr:MTR_5g059130|flavonol synthase [EC:1.14.11.23]	-	GO:0051213//dioxygenase activity	-	gi|460375495|ref|XP_004233541.1|/0/PREDICTED: flavonol synthase/flavanone 3-hydroxylase-like isoform 3 [Solanum lycopersicum]
Solyc06g053640	325.735	793.562	1.28464	0.000251738	0.00684907	K05283|1|2e-23|107|aly:ARALYDRAFT_354960|phosphatidylinositol glycan, class W [EC:2.3.-.-];K15692|2|2e-10|64.3|ppp:PHYPADRAFT_16563|E3 ubiquitin-protein ligase RNF13 [EC:6.3.2.19];K13148|4|3e-09|60.5|vvi:100261060|integrator complex subunit 11 [EC:3.1.27.-]	-	-	-	gi|460390799|ref|XP_004241012.1|/1.12605e-162/PREDICTED: RING-H2 finger protein ATL16-like [Solanum lycopersicum]
Solyc06g060870	66.3809	161.676	1.28427	0.00270631	0.0426119	K01058|1|1e-94|345|mtr:MTR_7g081620|phospholipase A1 [EC:3.1.1.32]	GO:0009507//chloroplast	GO:0008970//phosphatidylcholine 1-acylhydrolase activity;GO:0047714//galactolipase activity;GO:0004806//triglyceride lipase activity	GO:0006629//lipid metabolic process;GO:0009693//ethylene biosynthetic process	gi|460392773|ref|XP_004241988.1|/0/PREDICTED: phospholipase A1-Ibeta2, chloroplastic-like [Solanum lycopersicum]
Solyc01g080070	340.036	827.55	1.28316	0.000223008	0.00625125	K07213|1|8e-11|66.6|vvi:100247137|copper chaperone	GO:0044464//cell part	-	-	gi|460367150|ref|XP_004229438.1|/0/PREDICTED: uncharacterized protein LOC101256517 isoform 2 [Solanum lycopersicum]
Solyc10g086280	6432.59	15649.2	1.28262	0.000109056	0.00349373	K07213|1|8e-08|56.2|gmx:547569|copper chaperone;K03514|5|2e-06|51.2|cre:CHLREDRAFT_17066|DNA polymerase sigma subunit [EC:2.7.7.7]	-	-	-	gi|460408362|ref|XP_004249614.1|/0/PREDICTED: uncharacterized protein LOC101259996 [Solanum lycopersicum]
Solyc11g066130	370.798	901.977	1.28246	0.00025713	0.00697013	-	GO:0009505//plant-type cell wall;GO:0009506//plasmodesma;GO:0005576//extracellular region	-	GO:0042545//cell wall modification;GO:0000911//cytokinesis by cell plate formation;GO:0009664//plant-type cell wall organization;GO:0051707//response to other organism	gi|350535593|ref|NP_001234714.1|/1.19683e-154/osmotin-like protein precursor [Solanum lycopersicum]
Solyc08g066840	2451.65	5961.55	1.28194	0.000106576	0.00341922	K09873|1|8e-102|367|ath:AT2G25810|aquaporin TIP	GO:0009705//plant-type vacuole membrane;GO:0042807//central vacuole;GO:0016021//integral to membrane	GO:0015250//water channel activity	GO:0006833//water transport;GO:0055085//transmembrane transport;GO:0009736//cytokinin mediated signaling pathway	gi|460399303|ref|XP_004245181.1|/2.75267e-140/PREDICTED: aquaporin TIP4-1-like [Solanum lycopersicum]
Solyc02g085010	1546.09	3756.54	1.28078	0.000113577	0.00359705	-	-	-	GO:0051707//response to other organism;GO:0044763;GO:0045087//innate immune response;GO:0050794//regulation of cellular process;GO:0031347//regulation of defense response	gi|460373232|ref|XP_004232425.1|/6.83923e-63/PREDICTED: uncharacterized protein LOC101264778 [Solanum lycopersicum]
Solyc05g054170	415.167	1008.71	1.28075	0.000273024	0.00735518	K14494|1|6e-13|73.2|pop:POPTR_645273|DELLA protein	-	-	GO:0006351//transcription, DNA-dependent	gi|460388327|ref|XP_004239819.1|/0/PREDICTED: scarecrow-like protein 13-like isoform 1 [Solanum lycopersicum]
Solyc06g071480	135.044	327.195	1.27672	0.000876983	0.0182988	-	-	-	GO:0009888//tissue development;GO:0006355//regulation of transcription, DNA-dependent	gi|460391869|ref|XP_004241541.1|/3.74204e-171/PREDICTED: dof zinc finger protein DOF5.6-like [Solanum lycopersicum]
Solyc07g021340	123.302	298.491	1.27549	0.000886013	0.0184007	-	-	-	-	gi|255547379|ref|XP_002514747.1|/5.27643e-07/conserved hypothetical protein [Ricinus communis]
Solyc05g051530	368.625	890.99	1.27326	0.0002557	0.00694833	K05681|1|1e-52|206|cme:CMS467C|ATP-binding cassette, subfamily G (WHITE), member 2;K12843|2|6e-51|200|vvi:100248403|U4/U6 small nuclear ribonucleoprotein PRP3;K05658|4|5e-10|64.3|pop:POPTR_806076|ATP-binding cassette, subfamily B (MDR/TAP), member 1	GO:0016020//membrane	GO:0015416//organic phosphonate transmembrane-transporting ATPase activity;GO:0005524//ATP binding	GO:0006200//ATP catabolic process	gi|460389203|ref|XP_004240248.1|/0/PREDICTED: ABC transporter G family member 11-like [Solanum lycopersicum]
Solyc08g007460	1741.2	4201.74	1.27091	0.000156013	0.00468059	-	-	-	-	gi|460398045|ref|XP_004244575.1|/1.17203e-84/PREDICTED: lipid transfer-like protein VAS-like [Solanum lycopersicum]
Solyc12g008580	74.0867	178.696	1.27022	0.00253798	0.0406242	K14489|1|1e-15|83.2|vvi:100263145|arabidopsis histidine kinase 2/3/4 (cytokinin receptor) [EC:2.7.13.3]	GO:0009505//plant-type cell wall;GO:0046658//anchored to plasma membrane;GO:0016023//cytoplasmic membrane-bounded vesicle	GO:0043169//cation binding;GO:0042973//glucan endo-1,3-beta-D-glucosidase activity	GO:0005975//carbohydrate metabolic process	gi|460412516|ref|XP_004251644.1|/0/PREDICTED: glucan endo-1,3-beta-glucosidase 13-like [Solanum lycopersicum]
Solyc06g074550	138.287	333.364	1.26943	0.000857078	0.0180019	-	-	-	-	gi|224105001|ref|XP_002313649.1|/4.15251e-11/predicted protein [Populus trichocarpa]
Solyc07g042990	225.551	543.38	1.26851	0.000483628	0.0116707	K13420|1|2e-31|135|aly:ARALYDRAFT_356368|LRR receptor-like serine/threonine-protein kinase FLS2 [EC:2.7.11.1]	-	-	GO:0007165//signal transduction	gi|460396185|ref|XP_004243659.1|/0/PREDICTED: probably inactive leucine-rich repeat receptor-like protein kinase IMK2-like [Solanum lycopersicum]
Solyc01g087820	1174.85	2829.56	1.2681	0.000152958	0.00460763	K08653|1|6e-06|51.6|bdi:100822086|membrane-bound transcription factor site-1 protease [EC:3.4.21.112]	-	GO:0042802//identical protein binding;GO:0004252//serine-type endopeptidase activity	GO:0043086//negative regulation of catalytic activity;GO:0006508//proteolysis	gi|3970731|emb|CAA07059.1|/0/SBT4B protein [Solanum lycopersicum]
Solyc02g082740	263.182	633.724	1.26779	0.000368046	0.00928522	-	GO:0016023//cytoplasmic membrane-bounded vesicle	-	-	gi|460373507|ref|XP_004232560.1|/6.21538e-108/PREDICTED: uncharacterized protein LOC101255945 [Solanum lycopersicum]
Solyc01g106910	161.516	388.711	1.26702	0.0006035	0.0137843	-	-	-	-	gi|460369682|ref|XP_004230686.1|/2.85832e-110/PREDICTED: uncharacterized protein LOC101262261 isoform 2 [Solanum lycopersicum]
Solyc01g107090	1437.21	3453.67	1.26486	0.00012693	0.00395782	-	GO:0005739//mitochondrion	GO:0016798//hydrolase activity, acting on glycosyl bonds	GO:0008152//metabolic process	gi|255573167|ref|XP_002527513.1|/1.31873e-18/conserved hypothetical protein [Ricinus communis]
Solyc12g042500	247.077	593.625	1.26459	0.000426134	0.0105587	-	-	-	GO:0044699	gi|460413863|ref|XP_004252296.1|/1.94374e-49/PREDICTED: snakin-1-like [Solanum lycopersicum]
Solyc07g005020	104.005	249.569	1.26278	0.00164894	0.0294751	K02209|1|0.0|1224|vvi:100261877|minichromosome maintenance protein 5 (cell division control protein 46)	GO:0005737//cytoplasm;GO:0042555//MCM complex;GO:0005634//nucleus	GO:0008094//DNA-dependent ATPase activity;GO:0003677//DNA binding;GO:0005524//ATP binding;GO:0003678//DNA helicase activity	GO:0006275//regulation of DNA replication;GO:0000911//cytokinesis by cell plate formation;GO:0051567//histone H3-K9 methylation;GO:0006268//DNA unwinding involved in replication;GO:0010389//regulation of G2/M transition of mitotic cell cycle;GO:0008283//cell proliferation;GO:0006306//DNA methylation;GO:0009909//regulation of flower development;GO:0006270//DNA replication initiation	gi|460393923|ref|XP_004242557.1|/0/PREDICTED: DNA replication licensing factor mcm5-A-like [Solanum lycopersicum]
Solyc05g013010	125.165	299.333	1.25792	0.000887663	0.0184178	K11821|1|6e-58|222|ath:AT1G74100|desulfoglucosinolate sulfotransferase A/B/C [EC:2.8.2.-];K01014|3|4e-09|60.5|olu:OSTLU_32551|aryl sulfotransferase [EC:2.8.2.1]	-	GO:0008146//sulfotransferase activity	GO:0009812//flavonoid metabolic process	gi|460386835|ref|XP_004239101.1|/0/PREDICTED: cytosolic sulfotransferase 5-like [Solanum lycopersicum]
Solyc01g107650	158.642	379.359	1.25779	0.000796221	0.0170134	K13415|1|2e-48|192|aly:ARALYDRAFT_912402|protein brassinosteroid insensitive 1 [EC:2.7.10.1 2.7.11.1]	GO:0016020//membrane	GO:0016301//kinase activity;GO:0000166//nucleotide binding	GO:0016310//phosphorylation	gi|460369792|ref|XP_004230741.1|/0/PREDICTED: probable LRR receptor-like serine/threonine-protein kinase At4g37250-like [Solanum lycopersicum]
Solyc01g111210	109.744	262.381	1.25752	0.00168465	0.0298956	K02433|1|2e-31|135|ppp:PHYPADRAFT_220555|aspartyl-tRNA(Asn)/glutamyl-tRNA (Gln) amidotransferase subunit A [EC:6.3.5.6 6.3.5.7]	-	GO:0016787//hydrolase activity;GO:0016884//carbon-nitrogen ligase activity, with glutamine as amido-N-donor	-	gi|460370335|ref|XP_004231008.1|/0/PREDICTED: putative amidase C869.01-like [Solanum lycopersicum]
Solyc09g075900	145.775	348.414	1.25706	0.00112362	0.0220953	K00797|1|5e-158|555|rcu:RCOM_0677780|spermidine synthase [EC:2.5.1.16]	-	GO:0004766//spermidine synthase activity	GO:0008152//metabolic process	gi|460403778|ref|XP_004247364.1|/0/PREDICTED: thermospermine synthase ACAULIS5-like [Solanum lycopersicum]
Solyc12g009270	149.551	357.375	1.2568	0.000977794	0.0198841	K01051|1|2e-16|83.2|aly:ARALYDRAFT_478847|pectinesterase [EC:3.1.1.11]	GO:0009507//chloroplast	GO:0046910//pectinesterase inhibitor activity	-	gi|460412639|ref|XP_004251705.1|/2.86495e-102/PREDICTED: 21 kDa protein-like [Solanum lycopersicum]
Solyc05g055080	118.574	283.318	1.25663	0.00099962	0.0202302	-	-	-	-	-
Solyc11g008080	91.3045	218.087	1.25615	0.00210371	0.0353822	-	-	-	-	gi|460409218|ref|XP_004250036.1|/1.45909e-165/PREDICTED: uncharacterized protein LOC101263962 [Solanum lycopersicum]
Solyc12g044330	6354.71	15169.2	1.25525	0.000156564	0.00469079	K09873|1|4e-114|408|ath:AT3G16240|aquaporin TIP;K09866|2|9e-109|390|sbi:SORBI_10g019360|aquaporin-4	GO:0016021//integral to membrane;GO:0009941//chloroplast envelope;GO:0009705//plant-type vacuole membrane;GO:0009505//plant-type cell wall;GO:0000326//protein storage vacuole;GO:0042807//central vacuole;GO:0005886//plasma membrane	GO:0015204//urea transmembrane transporter activity;GO:0051739//ammonia transmembrane transporter activity;GO:0015200//methylammonium transmembrane transporter activity	GO:0071918//urea transmembrane transport;GO:0072489//methylammonium transmembrane transport;GO:0006833//water transport	gi|460413975|ref|XP_004252350.1|/4.42959e-138/PREDICTED: aquaporin TIP2-1-like [Solanum lycopersicum]
Solyc10g085070	142.004	338.904	1.25495	0.00109186	0.0216045	-	GO:0016324//apical plasma membrane	-	GO:0010233//phloem transport;GO:0010588//cotyledon vascular tissue pattern formation;GO:0010088//phloem development;GO:0022622//root system development	gi|460408340|ref|XP_004249603.1|/0/PREDICTED: UPF0503 protein At3g09070, chloroplastic-like [Solanum lycopersicum]
Solyc01g109180	288.842	689.181	1.2546	0.000487116	0.0117294	K01897|1|0.0|1071|vvi:100257137|long-chain acyl-CoA synthetase [EC:6.2.1.3]	GO:0009506//plasmodesma;GO:0005783//endoplasmic reticulum;GO:0005634//nucleus	GO:0004467//long-chain fatty acid-CoA ligase activity;GO:0031957//very long-chain fatty acid-CoA ligase activity	GO:0010025//wax biosynthetic process;GO:0010143//cutin biosynthetic process;GO:0010311//lateral root formation;GO:0002213//defense response to insect;GO:0001676//long-chain fatty acid metabolic process;GO:0050832//defense response to fungus	gi|460370002|ref|XP_004230844.1|/0/PREDICTED: long chain acyl-CoA synthetase 2-like [Solanum lycopersicum]
Solyc01g109700	114.159	272.154	1.25338	0.00133786	0.0251711	K12126|1|2e-14|78.6|aly:ARALYDRAFT_471048|phytochrome-interacting factor 3;K10863|3|7e-07|53.5|ath:AT5G01310|aprataxin [EC:3.-.-.-]	-	-	-	gi|460370132|ref|XP_004230908.1|/0/PREDICTED: transcription factor bHLH63-like [Solanum lycopersicum]
Solyc09g083370	227.416	542.074	1.25316	0.000483388	0.0116707	K02958|1|1e-73|272|vvi:100256302|small subunit ribosomal protein S15e	GO:0005730//nucleolus;GO:0005886//plasma membrane;GO:0022627//cytosolic small ribosomal subunit	GO:0003735//structural constituent of ribosome;GO:0003723//RNA binding	GO:0006412//translation	gi|460404353|ref|XP_004247647.1|/4.31376e-79/PREDICTED: 40S ribosomal protein S15-like [Solanum lycopersicum]
Solyc11g007900	173.686	413.628	1.25185	0.000639795	0.0143912	K09291|1|5e-23|109|mtr:MTR_2g063480|nucleoprotein TPR	-	-	-	gi|460409190|ref|XP_004250022.1|/0/PREDICTED: uncharacterized protein LOC101260002 [Solanum lycopersicum]
Solyc02g069910	752.653	1792.21	1.25168	0.000228011	0.00633551	-	-	-	-	gi|460374733|ref|XP_004233164.1|/1.35758e-55/PREDICTED: uncharacterized protein LOC101260199 [Solanum lycopersicum]
Solyc10g081970	1375.21	3274.53	1.25164	0.000184575	0.00538468	K08488|1|5e-12|67.8|ath:AT1G32270|syntaxin 7	-	-	-	gi|460408692|ref|XP_004249776.1|/3.97677e-79/PREDICTED: putative syntaxin-24-like, partial [Solanum lycopersicum]
Solyc01g067330	83.3856	198.379	1.25039	0.00263458	0.0418979	-	GO:0016021//integral to membrane;GO:0009506//plasmodesma;GO:0005886//plasma membrane	GO:0043424//protein histidine kinase binding	-	gi|460366699|ref|XP_004229217.1|/3.30333e-101/PREDICTED: CASP-like protein 6-like [Solanum lycopersicum]
Solyc10g080390	166.456	395.851	1.24981	0.000744997	0.0161836	K08857|1|3e-94|344|smo:SELMODRAFT_85451|NIMA (never in mitosis gene a)-related kinase [EC:2.7.11.1]	-	GO:0005524//ATP binding;GO:0004674//protein serine/threonine kinase activity	GO:0006468//protein phosphorylation	gi|460407673|ref|XP_004249275.1|/0/PREDICTED: serine/threonine-protein kinase Nek6-like [Solanum lycopersicum]
Solyc06g050140	110.705	263.265	1.2498	0.00142027	0.0264525	-	-	-	-	-
Solyc11g068770	1426.87	3391.95	1.24926	0.000183311	0.00536192	K12581|1|7e-81|298|gmx:100789409|CCR4-NOT transcription complex subunit 7/8	GO:0005634//nucleus	GO:0004535//poly(A)-specific ribonuclease activity;GO:0003676//nucleic acid binding	GO:0009611//response to wounding;GO:0009693//ethylene biosynthetic process;GO:0002679//respiratory burst involved in defense response;GO:0009612//response to mechanical stimulus;GO:0009873//ethylene mediated signaling pathway;GO:0010200//response to chitin;GO:0042742//defense response to bacterium;GO:0000165//MAPK cascade;GO:0009814//defense response, incompatible interaction;GO:0010228//vegetati…	gi|460411370|ref|XP_004251085.1|/2.43909e-165/PREDICTED: probable CCR4-associated factor 1 homolog 11-like [Solanum lycopersicum]
Solyc10g055630	2616.97	6218.62	1.2487	0.000166273	0.00493505	K09872|1|1e-138|490|ath:AT4G35100|aquaporin PIP	GO:0005773//vacuole;GO:0046658//anchored to plasma membrane;GO:0009506//plasmodesma;GO:0016021//integral to membrane;GO:0005634//nucleus	GO:0005515//protein binding;GO:0015250//water channel activity	GO:0006833//water transport;GO:0055085//transmembrane transport;GO:0009737//response to abscisic acid stimulus	gi|350540014|ref|NP_001233846.1|/7.2538e-162/putative PIP-type aquaporin [Solanum lycopersicum]
Solyc03g006050	312.016	741.296	1.24843	0.00045823	0.0111916	-	-	-	-	gi|460376591|ref|XP_004234081.1|/6.61767e-96/PREDICTED: probable LRR receptor-like serine/threonine-protein kinase At4g36180-like isoform 2 [Solanum lycopersicum]
Solyc09g082510	353.32	838.889	1.24751	0.000344425	0.00878918	K10400|1|1e-30|135|vvi:100255624|kinesin family member 15;K09291|5|5e-29|129|mtr:MTR_2g063480|nucleoprotein TPR	-	-	-	gi|460404233|ref|XP_004247588.1|/0/PREDICTED: uncharacterized protein LOC101252434 [Solanum lycopersicum]
Solyc05g007830	672.038	1594.3	1.24631	0.000235564	0.0064805	-	GO:0009505//plant-type cell wall;GO:0005576//extracellular region;GO:0016020//membrane	-	GO:0009664//plant-type cell wall organization;GO:0010119//regulation of stomatal movement;GO:0010114//response to red light;GO:0006949//syncytium formation	gi|460386262|ref|XP_004238818.1|/6.41684e-153/PREDICTED: expansin-A1 [Solanum lycopersicum]
Solyc06g065680	110.066	261.011	1.24574	0.00160616	0.0289933	K06627|1|1e-139|494|pop:POPTR_548650|cyclin A	GO:0005634//nucleus	GO:0019901//protein kinase binding	GO:0000079//regulation of cyclin-dependent protein serine/threonine kinase activity;GO:0051301//cell division	gi|350537079|ref|NP_001233768.1|/0/cyclin A2 [Solanum lycopersicum]
Solyc07g006420	110.653	261.831	1.2426	0.00143885	0.0266437	-	GO:0043231//intracellular membrane-bounded organelle;GO:0044444//cytoplasmic part	-	GO:0051716//cellular response to stimulus;GO:0010033//response to organic substance;GO:0050794//regulation of cellular process;GO:0006950//response to stress	gi|255585005|ref|XP_002533213.1|/7.58152e-35/conserved hypothetical protein [Ricinus communis]
Solyc10g075020	1014.07	2399.06	1.24232	0.000245701	0.00671774	K02356|1|2e-88|323|gmx:100500109|elongation factor P	GO:0005739//mitochondrion;GO:0009570//chloroplast stroma	GO:0003746//translation elongation factor activity	GO:0043043//peptide biosynthetic process;GO:0016226//iron-sulfur cluster assembly;GO:0006414//translational elongation;GO:0045036//protein targeting to chloroplast;GO:0009793//embryo development ending in seed dormancy	gi|460407194|ref|XP_004249039.1|/2.74187e-128/PREDICTED: elongation factor P-like [Solanum lycopersicum]
Solyc07g065460	93.2693	220.598	1.24194	0.00250882	0.0402155	-	-	-	-	gi|460397041|ref|XP_004244077.1|/9.15478e-60/PREDICTED: uncharacterized protein LOC101260954 [Solanum lycopersicum]
Solyc10g084840	264.662	625.844	1.24165	0.000599906	0.0137304	-	GO:0005576//extracellular region	-	GO:0051707//response to other organism	gi|460408212|ref|XP_004249540.1|/6.09402e-148/PREDICTED: thaumatin-like protein-like [Solanum lycopersicum]
Solyc10g075110	2526.09	5967.78	1.24029	0.000184557	0.00538468	-	-	GO:0008289//lipid binding	GO:0006950//response to stress;GO:0006869//lipid transport	gi|350538169|ref|NP_001234074.1|/9.78105e-62/non-specific lipid-transfer protein 1 precursor [Solanum lycopersicum]
Solyc05g024260	461.73	1089.79	1.23892	0.000351278	0.00894348	K15382|1|4e-80|296|pop:POPTR_853183|solute carrier family 50 (sugar transporter)	GO:0005887//integral to plasma membrane	-	GO:0010150//leaf senescence;GO:0071446//cellular response to salicylic acid stimulus;GO:0071470//cellular response to osmotic stress;GO:0008643//carbohydrate transport;GO:0071215//cellular response to abscisic acid stimulus	gi|460387271|ref|XP_004239304.1|/1.15063e-165/PREDICTED: bidirectional sugar transporter SWEET12-like [Solanum lycopersicum]
Solyc04g007870	120.324	283.953	1.23873	0.00143588	0.0266315	K06674|1|2e-07|56.2|ath:AT3G47460|structural maintenance of chromosome 2;K06669|2|4e-07|55.5|cme:CML027C|structural maintenance of chromosome 3 (chondroitin sulfate proteoglycan 6);K14306|3|7e-07|54.7|rcu:RCOM_1609340|nuclear pore complex protein Nup62;K11323|5|1e-06|53.9|vcn:VOLCADRAFT_121342|histone arginine demethylase JMJD6 [EC:1.14.11.-]	-	-	-	gi|460382438|ref|XP_004236946.1|/0/PREDICTED: uncharacterized protein LOC101243980 [Solanum lycopersicum]
Solyc12g044950	171.719	405.148	1.2384	0.000766788	0.0165437	K10256|1|5e-127|452|pop:POPTR_667376|omega-6 fatty acid desaturase (delta-12 desaturase) [EC:1.14.19.-]	-	GO:0016717//oxidoreductase activity, acting on paired donors, with oxidation of a pair of donors resulting in the reduction of molecular oxygen to two molecules of water	GO:0006629//lipid metabolic process;GO:0055114//oxidation-reduction process	gi|350536351|ref|NP_001234242.1|/0/lipid desaturase-like protein [Solanum lycopersicum]
Solyc03g111380	72.6	171.19	1.23756	0.00316459	0.0478664	K10389|1|0.0|913|vvi:100267092|tubulin gamma	GO:0005618//cell wall;GO:0005829//cytosol;GO:0005874//microtubule;GO:0005635//nuclear envelope;GO:0005886//plasma membrane;GO:0005739//mitochondrion	GO:0005198//structural molecule activity;GO:0005525//GTP binding;GO:0003924//GTPase activity	GO:0010103//stomatal complex morphogenesis;GO:0000914//phragmoplast assembly;GO:0007017//microtubule-based process;GO:0051641//cellular localization;GO:0006184//GTP catabolic process;GO:0051258//protein polymerization;GO:0009553//embryo sac development;GO:0048768//root hair cell tip growth;GO:0048366//leaf development	gi|460381166|ref|XP_004236323.1|/0/PREDICTED: tubulin gamma-1 chain-like [Solanum lycopersicum]
Solyc00g233480	84.3965	198.945	1.23711	0.00271958	0.0427602	K05681|1|5e-08|55.5|cme:CMS467C|ATP-binding cassette, subfamily G (WHITE), member 2	GO:0016020//membrane	GO:0005524//ATP binding;GO:0016887//ATPase activity	GO:0006200//ATP catabolic process	gi|302141654|emb|CBI18832.3|/7.90376e-33/unnamed protein product [Vitis vinifera]
Solyc01g109590	299.052	704.857	1.23693	0.000492514	0.0118465	K04733|1|2e-79|295|smo:SELMODRAFT_159261|interleukin-1 receptor-associated kinase 4 [EC:2.7.11.1];K13430|4|2e-74|278|rcu:RCOM_1078760|serine/threonine-protein kinase PBS1 [EC:2.7.11.1]	GO:0005634//nucleus	GO:0005524//ATP binding;GO:0004674//protein serine/threonine kinase activity	GO:0006468//protein phosphorylation	gi|460370112|ref|XP_004230898.1|/0/PREDICTED: probable receptor-like serine/threonine-protein kinase At4g34500-like [Solanum lycopersicum]
Solyc04g007390	246.708	580.993	1.23572	0.000539408	0.0126997	K00924|1|2e-51|201|aly:ARALYDRAFT_313416|[EC:2.7.1.-];K04733|3|3e-51|200|smo:SELMODRAFT_230241|interleukin-1 receptor-associated kinase 4 [EC:2.7.11.1]	GO:0005886//plasma membrane	GO:0004715//non-membrane spanning protein tyrosine kinase activity;GO:0030247//polysaccharide binding;GO:0005524//ATP binding;GO:0004674//protein serine/threonine kinase activity	GO:0006468//protein phosphorylation	gi|460382953|ref|XP_004237200.1|/0/PREDICTED: probable serine/threonine-protein kinase At1g18390-like [Solanum lycopersicum]
Solyc03g114860	183.991	433.251	1.23556	0.000839303	0.0177461	K13379|1|0.0|689|rcu:RCOM_1468610|reversibly glycosylated polypeptide / UDP-arabinopyranose mutase [EC:2.4.1.- 5.4.99.30]	-	GO:0016866//intramolecular transferase activity;GO:0008466//glycogenin glucosyltransferase activity	GO:0030244//cellulose biosynthetic process	gi|460380655|ref|XP_004236070.1|/0/PREDICTED: alpha-1,4-glucan-protein synthase [UDP-forming] 2-like [Solanum lycopersicum]
Solyc05g054040	127.497	299.985	1.23443	0.00147099	0.0271241	-	GO:0016021//integral to membrane;GO:0009505//plant-type cell wall;GO:0005794//Golgi apparatus	-	-	gi|460388357|ref|XP_004239834.1|/0/PREDICTED: putative phagocytic receptor 1b-like [Solanum lycopersicum]
Solyc09g007770	544.901	1280.33	1.23245	0.000356875	0.00905484	K09872|1|4e-133|471|rcu:RCOM_1356060|aquaporin PIP	GO:0005773//vacuole;GO:0005886//plasma membrane;GO:0016021//integral to membrane;GO:0009507//chloroplast	GO:0005215//transporter activity	GO:0009269//response to desiccation;GO:0006833//water transport;GO:0006970//response to osmotic stress;GO:0080170//hydrogen peroxide transmembrane transport;GO:0009737//response to abscisic acid stimulus	gi|460408108|ref|XP_004249489.1|/1.44923e-134/PREDICTED: aquaporin PIP2-1-like [Solanum lycopersicum]
Solyc02g087540	117.291	275.481	1.23186	0.00185552	0.032284	K08900|1|2e-148|524|vvi:100255946|mitochondrial chaperone BCS1	-	GO:0000166//nucleotide binding	-	gi|460375794|ref|XP_004233689.1|/0/PREDICTED: ATP-dependent zinc metalloprotease FtsH 2-like [Solanum lycopersicum]
Solyc01g109110	977.049	2294.52	1.23169	0.000233222	0.00644804	K04640|1|3e-42|172|vvi:100244127|guanine nucleotide-binding protein subunit alpha, other	-	GO:0000166//nucleotide binding	GO:0044699;GO:0050789//regulation of biological process;GO:0009987//cellular process;GO:0009743//response to carbohydrate stimulus	gi|460369994|ref|XP_004230840.1|/0/PREDICTED: uncharacterized protein LOC101258203 [Solanum lycopersicum]
Solyc10g008320	153.275	359.11	1.2283	0.00107543	0.0214131	-	-	-	-	gi|225446368|ref|XP_002273678.1|/2.58238e-47/PREDICTED: uncharacterized protein LOC100243770 [Vitis vinifera]
Solyc02g078160	127.073	297.653	1.22798	0.00147674	0.0272076	-	-	-	-	gi|460374165|ref|XP_004232882.1|/9.14741e-174/PREDICTED: uncharacterized protein LOC101251439 [Solanum lycopersicum]
Solyc10g009190	2206.84	5162.92	1.22621	0.000221968	0.00622998	K15174|1|1e-06|49.3|rcu:RCOM_1489440|RNA polymerase II-associated factor 1;K09250|3|2e-06|48.9|sbi:SORBI_04g001720|cellular nucleic acid-binding protein	GO:0005576//extracellular region;GO:0016023//cytoplasmic membrane-bounded vesicle	-	-	gi|460405274|ref|XP_004248101.1|/1.44801e-73/PREDICTED: uncharacterized protein LOC101244324 [Solanum lycopersicum]
Solyc05g005150	5861.16	13699	1.22481	0.000221117	0.00621582	-	-	-	-	gi|460385920|ref|XP_004238648.1|/0/PREDICTED: F-box/kelch-repeat protein At1g23390-like [Solanum lycopersicum]
Solyc10g007320	1842.04	4303.43	1.22418	0.000243226	0.00667474	K01599|1|1e-179|627|mtr:MTR_2g076340|uroporphyrinogen decarboxylase [EC:4.1.1.37]	GO:0009570//chloroplast stroma	GO:0004853//uroporphyrinogen decarboxylase activity	GO:0009684//indoleacetic acid biosynthetic process;GO:0015995//chlorophyll biosynthetic process;GO:0006782//protoporphyrinogen IX biosynthetic process;GO:0006569//tryptophan catabolic process;GO:0046686//response to cadmium ion	gi|460405553|ref|XP_004248240.1|/0/PREDICTED: uroporphyrinogen decarboxylase 1, chloroplastic-like [Solanum lycopersicum]
Solyc08g080650	5678.88	13267.2	1.22418	0.000189741	0.00548496	-	-	-	-	gi|460400211|ref|XP_004245629.1|/1.26265e-153/PREDICTED: pathogenesis-related protein PR P23 [Solanum lycopersicum]
Solyc01g103470	95.819	223.406	1.22129	0.00306673	0.0468765	-	-	-	-	gi|224119950|ref|XP_002331100.1|/1.5119e-18/predicted protein [Populus trichocarpa]
Solyc05g016390	148.704	346.542	1.22059	0.00125241	0.0239697	K14489|1|5e-19|92.8|vvi:100263145|arabidopsis histidine kinase 2/3/4 (cytokinin receptor) [EC:2.7.13.3];K01115|2|4e-12|70.1|vcn:VOLCADRAFT_99471|phospholipase D [EC:3.1.4.4]	-	-	-	gi|460387751|ref|XP_004239537.1|/1.17151e-152/PREDICTED: uncharacterized protein LOC101255594 [Solanum lycopersicum]
Solyc11g012320	2819.16	6557.58	1.2179	0.000218898	0.00617504	K14306|1|2e-15|79.3|vcn:VOLCADRAFT_105669|nuclear pore complex protein Nup62	-	-	-	gi|460409684|ref|XP_004250268.1|/1.04141e-75/PREDICTED: uncharacterized protein LOC101257132 [Solanum lycopersicum]
Solyc04g078200	201.373	467.179	1.21411	0.000866482	0.0181137	-	GO:0016023//cytoplasmic membrane-bounded vesicle	-	GO:0032940//secretion by cell;GO:0008283//cell proliferation	gi|146742170|gb|ABQ42622.1|/7.14463e-36/snakin-1 [Solanum chacoense]
Solyc08g068680	450.04	1041.62	1.21071	0.000469877	0.0114133	K01590|1|5e-155|545|rcu:RCOM_1170790|histidine decarboxylase [EC:4.1.1.22]	-	GO:0030170//pyridoxal phosphate binding;GO:0004398//histidine decarboxylase activity	GO:0019752//carboxylic acid metabolic process	gi|350538737|ref|NP_001233845.1|/0/aromatic amino acid decarboxylase 1A [Solanum lycopersicum]
Solyc12g098490	214.396	495.972	1.20998	0.000795661	0.0170134	K00600|1|0.0|891|rcu:RCOM_0523510|glycine hydroxymethyltransferase [EC:2.1.2.1]	GO:0005886//plasma membrane	GO:0004372//glycine hydroxymethyltransferase activity;GO:0030170//pyridoxal phosphate binding;GO:0008168//methyltransferase activity	GO:0006544//glycine metabolic process;GO:0010197//polar nucleus fusion;GO:0032259//methylation;GO:0035999//tetrahydrofolate interconversion;GO:0009555//pollen development;GO:0006563//L-serine metabolic process;GO:0046686//response to cadmium ion	gi|460415278|ref|XP_004252986.1|/0/PREDICTED: serine hydroxymethyltransferase 1-like [Solanum lycopersicum]
Solyc09g090500	115.859	267.894	1.2093	0.00204472	0.0347056	K00574|1|2e-174|610|ath:AT3G23510|cyclopropane-fatty-acyl-phospholipid synthase [EC:2.1.1.79];K05928|4|1e-06|52.8|vcn:VOLCADRAFT_105162|tocopherol O-methyltransferase [EC:2.1.1.95]	GO:0005737//cytoplasm	GO:0016491//oxidoreductase activity;GO:0008825//cyclopropane-fatty-acyl-phospholipid synthase activity	GO:0008610//lipid biosynthetic process;GO:0032259//methylation;GO:0055114//oxidation-reduction process	gi|460404582|ref|XP_004247760.1|/0/PREDICTED: probable fatty acid methyltransferase-like [Solanum lycopersicum]
Solyc01g106330	102.514	236.958	1.20881	0.00324335	0.0487843	K02433|1|9e-47|186|cre:CHLREDRAFT_188401|aspartyl-tRNA(Asn)/glutamyl-tRNA (Gln) amidotransferase subunit A [EC:6.3.5.6 6.3.5.7]	GO:0005794//Golgi apparatus;GO:0005886//plasma membrane;GO:0005774//vacuolar membrane;GO:0005783//endoplasmic reticulum	GO:0016884//carbon-nitrogen ligase activity, with glutamine as amido-N-donor;GO:0047412//N-(long-chain-acyl)ethanolamine deacylase activity;GO:0016740//transferase activity;GO:0004040//amidase activity	GO:0042742//defense response to bacterium;GO:0070291//N-acylethanolamine metabolic process	gi|460369377|ref|XP_004230539.1|/0/PREDICTED: fatty acid amide hydrolase-like [Solanum lycopersicum]
Solyc03g114960	293.529	676.872	1.20538	0.000633476	0.0142939	K15450|1|7e-32|137|smo:SELMODRAFT_418563|tRNA wybutosine-synthesizing protein 3 [EC:2.1.1.-]	GO:0044424//intracellular part	-	GO:0006869//lipid transport	gi|460380641|ref|XP_004236063.1|/0/PREDICTED: RING finger protein B-like [Solanum lycopersicum]
Solyc07g006480	1505.36	3470.96	1.20523	0.000314722	0.00821051	K13415|1|1e-60|232|pop:POPTR_562744|protein brassinosteroid insensitive 1 [EC:2.7.10.1 2.7.11.1]	-	-	-	gi|460394130|ref|XP_004242658.1|/0/PREDICTED: probably inactive leucine-rich repeat receptor-like protein kinase At5g48380-like [Solanum lycopersicum]
Solyc09g082830	238.358	549.082	1.20389	0.000905774	0.018741	K11596|1|0.0|1646|aly:ARALYDRAFT_917259|argonaute	GO:0005737//cytoplasm	GO:0003743//translation initiation factor activity;GO:0035198//miRNA binding	GO:0006413//translational initiation;GO:0006346//methylation-dependent chromatin silencing;GO:0007267//cell-cell signaling;GO:0009944//polarity specification of adaxial/abaxial axis;GO:0010050//vegetative phase change;GO:0009855//determination of bilateral symmetry;GO:0035019//somatic stem cell maintenance;GO:0010051//xylem and phloem pattern formation;GO:0009887//organ morphogenesis;GO:0010014//…	gi|460404284|ref|XP_004247613.1|/0/PREDICTED: protein argonaute 10-like [Solanum lycopersicum]
Solyc04g040220	90.8807	209.31	1.20359	0.00311491	0.0473983	K14508|1|8e-39|159|rcu:RCOM_1047190|regulatory protein NPR1	GO:0005737//cytoplasm;GO:0005634//nucleus	GO:0005515//protein binding	GO:0009864//induced systemic resistance, jasmonic acid mediated signaling pathway;GO:0009944//polarity specification of adaxial/abaxial axis;GO:0009954//proximal/distal pattern formation;GO:0010582//floral meristem determinacy;GO:0010434//bract formation;GO:0010227//floral organ abscission;GO:0048439//flower morphogenesis;GO:0010254//nectary development	gi|460383222|ref|XP_004237330.1|/0/PREDICTED: regulatory protein NPR5-like [Solanum lycopersicum]
Solyc08g082470	111.451	256.679	1.20356	0.00197506	0.0338075	-	GO:0005576//extracellular region	-	GO:0048451//petal formation;GO:0048453//sepal formation	gi|460399968|ref|XP_004245508.1|/6.16063e-109/PREDICTED: uncharacterized protein LOC101253920 [Solanum lycopersicum]
Solyc05g055400	1810.9	4164.81	1.20154	0.000302506	0.00796671	K00517|1|0.0|811|vvi:100245465|[EC:1.14.-.-];K15399|5|0.0|702|aly:ARALYDRAFT_478392|cytochrome P450, family 77, subfamily A, polypeptide 6 [EC:1.14.-.-]	GO:0005739//mitochondrion;GO:0009507//chloroplast	GO:0016705//oxidoreductase activity, acting on paired donors, with incorporation or reduction of molecular oxygen;GO:0009055//electron carrier activity;GO:0019825//oxygen binding;GO:0020037//heme binding;GO:0005506//iron ion binding;GO:0052722//fatty acid in-chain hydroxylase activity	GO:0048868//pollen tube development;GO:0010048//vernalization response;GO:0009908//flower development;GO:0010143//cutin biosynthetic process;GO:0019395//fatty acid oxidation;GO:0009567//double fertilization forming a zygote and endosperm	gi|460388119|ref|XP_004239717.1|/0/PREDICTED: cytochrome P450 77A2-like [Solanum lycopersicum]
Solyc07g043500	878.465	2020.2	1.20144	0.000332209	0.00853632	K13496|1|3e-42|171|ath:AT2G36750|UDP-glucosyl transferase 73C [EC:2.4.1.-];K13495|4|9e-42|169|vvi:100248679|cis-zeatin O-glucosyltransferase [EC:2.4.1.215]	-	-	-	gi|460396139|ref|XP_004243636.1|/0/PREDICTED: cyanidin-3-O-glucoside 2-O-glucuronosyltransferase-like [Solanum lycopersicum]
Solyc04g074680	994.016	2284.91	1.20079	0.000297327	0.00784894	-	GO:0005739//mitochondrion	-	GO:0010224//response to UV-B;GO:0009693//ethylene biosynthetic process	gi|147843319|emb|CAN82663.1|/2.23186e-27/hypothetical protein VITISV_004929 [Vitis vinifera]
Solyc03g118310	114.692	262.9	1.19675	0.00212191	0.0355268	K13422|1|6e-16|84.0|mtr:MTR_8g067280|transcription factor MYC2	-	-	-	gi|460380193|ref|XP_004235842.1|/0/PREDICTED: transcription factor ICE1-like [Solanum lycopersicum]
Solyc09g014970	224.014	513.23	1.19601	0.000895376	0.0185431	K08233|1|6e-51|199|ath:AT2G23610|polyneuridine-aldehyde esterase [EC:3.1.1.78]	-	-	-	gi|460401605|ref|XP_004246309.1|/9.8038e-159/PREDICTED: polyneuridine-aldehyde esterase-like [Solanum lycopersicum]
Solyc09g090910	118.889	272.248	1.1953	0.00215104	0.0359333	K14484|1|5e-60|229|ath:AT1G04550|auxin-responsive protein IAA	-	-	GO:0080090//regulation of primary metabolic process;GO:0048856//anatomical structure development;GO:0010468//regulation of gene expression;GO:0044767;GO:0009733//response to auxin stimulus;GO:0006351//transcription, DNA-dependent;GO:2000112;GO:0007389//pattern specification process	gi|365818535|gb|AEX00356.1|/3.57766e-161/IAA13 [Solanum lycopersicum]
Solyc08g074680	165.659	378.968	1.19386	0.00133095	0.0251048	K00422|1|3e-135|482|vvi:100256583|polyphenol oxidase [EC:1.10.3.1]	-	GO:0004097//catechol oxidase activity;GO:0046872//metal ion binding	GO:0055114//oxidation-reduction process	gi|1172578|sp|Q08304.1|PPOB_SOLLC/0/RecName: Full=Polyphenol oxidase B, chloroplastic; Short=PPO; AltName: Full=Catechol oxidase; Flags: Precursor
Solyc03g122140	236.661	540.772	1.1922	0.00094487	0.0194052	K11517|1|2e-152|536|vvi:100248111|(S)-2-hydroxy-acid oxidase [EC:1.1.3.15]	GO:0005777//peroxisome	GO:0052853//long-chain-(S)-2-hydroxy-long-chain-acid oxidase activity;GO:0008891//glycolate oxidase activity;GO:0052854//medium-chain-(S)-2-hydroxy-acid oxidase activity;GO:0052852//very-long-chain-(S)-2-hydroxy-acid oxidase activity;GO:0010181//FMN binding	GO:0055114//oxidation-reduction process;GO:0042742//defense response to bacterium;GO:0010204//defense response signaling pathway, resistance gene-independent;GO:0050665//hydrogen peroxide biosynthetic process	gi|460379622|ref|XP_004235560.1|/0/PREDICTED: peroxisomal (S)-2-hydroxy-acid oxidase GLO4-like [Solanum lycopersicum]
Solyc02g094220	436.653	997.599	1.19197	0.000540035	0.0127005	-	GO:0031225//anchored to membrane	-	-	gi|460371896|ref|XP_004231770.1|/4.28227e-33/PREDICTED: uncharacterized protein LOC101265785 [Solanum lycopersicum]
Solyc12g088390	443.935	1012.17	1.18903	0.000543503	0.0127148	-	-	-	-	gi|460414938|ref|XP_004252818.1|/1.70885e-114/PREDICTED: zinc finger protein ZAT10-like [Solanum lycopersicum]
Solyc05g054530	135.096	307.593	1.18704	0.00215395	0.0359547	-	-	-	-	gi|460388260|ref|XP_004239786.1|/6.9648e-174/PREDICTED: uncharacterized protein LOC101263027 [Solanum lycopersicum]
Solyc03g081330	758.503	1720.38	1.1815	0.000479656	0.0116254	-	-	-	-	gi|460378521|ref|XP_004235019.1|/1.52031e-46/PREDICTED: uncharacterized protein LOC101248852 [Solanum lycopersicum]
Solyc02g070540	716.092	1622.2	1.17974	0.000504264	0.0120249	-	GO:0031225//anchored to membrane;GO:0005576//extracellular region;GO:0005634//nucleus;GO:0005886//plasma membrane	-	-	gi|460374638|ref|XP_004233117.1|/0/PREDICTED: uncharacterized protein LOC101246207 [Solanum lycopersicum]
Solyc09g011670	675.075	1529.17	1.17963	0.000453228	0.0110938	-	GO:0009506//plasmodesma;GO:0005737//cytoplasm;GO:0005886//plasma membrane	-	GO:0009409//response to cold	gi|460401742|ref|XP_004246376.1|/3.10152e-90/PREDICTED: universal stress protein Slr1101-like [Solanum lycopersicum]
Solyc02g088100	1236.33	2799.27	1.17899	0.000450377	0.0110484	-	GO:0009505//plant-type cell wall;GO:0005576//extracellular region;GO:0016020//membrane	-	GO:0009664//plant-type cell wall organization;GO:0010119//regulation of stomatal movement;GO:0010114//response to red light;GO:0006949//syncytium formation	gi|350538399|ref|NP_001234085.1|/1.13223e-143/expansin precursor [Solanum lycopersicum]
Solyc09g014510	96.0914	217.266	1.17699	0.0031585	0.0478647	K09648|1|3e-61|231|vvi:100244265|mitochondrial inner membrane protease subunit 2 [EC:3.4.21.-]	GO:0042720//mitochondrial inner membrane peptidase complex	GO:0008236//serine-type peptidase activity	GO:0035196//production of miRNAs involved in gene silencing by miRNA;GO:0006627//protein processing involved in protein targeting to mitochondrion;GO:0010267//production of ta-siRNAs involved in RNA interference;GO:0006508//proteolysis;GO:0051607//defense response to virus	gi|460401642|ref|XP_004246326.1|/8.89726e-96/PREDICTED: mitochondrial inner membrane protease subunit 2-like [Solanum lycopersicum]
Solyc01g087850	3091.81	6987.35	1.17629	0.000393054	0.00983788	-	-	GO:0042802//identical protein binding;GO:0004252//serine-type endopeptidase activity	GO:0043086//negative regulation of catalytic activity;GO:0006508//proteolysis	gi|350536739|ref|NP_001234774.1|/0/subtilisin-like protease precursor [Solanum lycopersicum]
Solyc06g068460	1692.53	3824.37	1.17604	0.000428518	0.0106059	K13424|1|1e-18|92.4|rcu:RCOM_0849600|WRKY transcription factor 33	-	GO:0003700//sequence-specific DNA binding transcription factor activity;GO:0043565//sequence-specific DNA binding	GO:0006355//regulation of transcription, DNA-dependent	gi|350537615|ref|NP_001234301.1|/0/WRKY transcription factor 1 [Solanum lycopersicum]
Solyc06g035960	623.62	1408.92	1.17585	0.000540962	0.0127063	K01904|1|5e-55|213|sbi:SORBI_01g016420|4-coumarate--CoA ligase [EC:6.2.1.12]	GO:0005829//cytosol;GO:0005739//mitochondrion;GO:0009506//plasmodesma;GO:0009570//chloroplast stroma;GO:0048046//apoplast	GO:0050203//oxalate-CoA ligase activity;GO:0008756//o-succinylbenzoate-CoA ligase activity;GO:0016208//AMP binding	GO:0015706//nitrate transport;GO:0010214//seed coat development;GO:0010167//response to nitrate;GO:0046482//para-aminobenzoic acid metabolic process;GO:0010030//positive regulation of seed germination;GO:0033611//oxalate catabolic process;GO:0046686//response to cadmium ion;GO:0050832//defense response to fungus	gi|460390213|ref|XP_004240733.1|/0/PREDICTED: 4-coumarate--CoA ligase-like 10-like [Solanum lycopersicum]
Solyc10g005480	791.623	1788.06	1.17551	0.000462871	0.0112554	-	-	-	-	gi|460405830|ref|XP_004248377.1|/6.82588e-100/PREDICTED: F-box protein SKIP27-like isoform 1 [Solanum lycopersicum]
Solyc02g079570	801.864	1810.77	1.17517	0.000533995	0.0125985	K04733|1|2e-64|246|smo:SELMODRAFT_159261|interleukin-1 receptor-associated kinase 4 [EC:2.7.11.1];K13430|3|2e-58|226|sbi:SORBI_04g020990|serine/threonine-protein kinase PBS1 [EC:2.7.11.1]	GO:0005886//plasma membrane	GO:0004672//protein kinase activity;GO:0005488//binding	GO:0009611//response to wounding;GO:0006944//cellular membrane fusion;GO:0010363//regulation of plant-type hypersensitive response;GO:0002679//respiratory burst involved in defense response;GO:0010200//response to chitin;GO:0006612//protein targeting to membrane;GO:0050832//defense response to fungus;GO:0043069//negative regulation of programmed cell death;GO:0009863//salicylic acid mediated sign…	gi|359496542|ref|XP_003635262.1|/0/PREDICTED: G-type lectin S-receptor-like serine/threonine-protein kinase B120-like [Vitis vinifera]
Solyc07g055630	136.107	306.903	1.17304	0.00229656	0.0377674	K13417|1|6e-40|162|ath:AT2G13790|somatic embryogenesis receptor kinase 4 [EC:2.7.10.1 2.7.11.1];K13418|3|2e-38|157|vvi:100247683|somatic embryogenesis receptor kinase 1 [EC:2.7.10.1 2.7.11.1];K04733|4|5e-38|156|smo:SELMODRAFT_159261|interleukin-1 receptor-associated kinase 4 [EC:2.7.11.1]	-	GO:0004674//protein serine/threonine kinase activity;GO:0000166//nucleotide binding	GO:0006468//protein phosphorylation;GO:0000165//MAPK cascade	gi|460395358|ref|XP_004243251.1|/2.80697e-120/PREDICTED: G-type lectin S-receptor-like serine/threonine-protein kinase SD2-5-like [Solanum lycopersicum]
Solyc03g112930	128.827	290.484	1.17302	0.00234629	0.0383861	-	-	-	GO:0009888//tissue development;GO:0006355//regulation of transcription, DNA-dependent	gi|460381590|ref|XP_004236531.1|/0/PREDICTED: dof zinc finger protein DOF5.6-like [Solanum lycopersicum]
Solyc01g094690	1148.51	2589.28	1.17279	0.000404733	0.0100961	K09872|1|4e-148|521|ath:AT4G23400|aquaporin PIP	GO:0009941//chloroplast envelope;GO:0046658//anchored to plasma membrane;GO:0005773//vacuole;GO:0016021//integral to membrane;GO:0009506//plasmodesma;GO:0005739//mitochondrion	GO:0005515//protein binding;GO:0015250//water channel activity	GO:0009750//response to fructose stimulus;GO:0016126//sterol biosynthetic process;GO:0006833//water transport;GO:0009414//response to water deprivation;GO:0010106//cellular response to iron ion starvation;GO:0009651//response to salt stress;GO:0006826//iron ion transport;GO:0006972//hyperosmotic response;GO:0007030//Golgi organization;GO:0006084//acetyl-CoA metabolic process;GO:0006096//glycolysi…	gi|350534744|ref|NP_001234413.1|/4.59993e-164/Aqp2 protein [Solanum lycopersicum]
Solyc03g006700	249.525	562.366	1.17232	0.00101701	0.0204331	K00430|1|6e-74|275|vvi:100257005|peroxidase [EC:1.11.1.7]	GO:0016023//cytoplasmic membrane-bounded vesicle	-	-	gi|460376706|ref|XP_004234138.1|/0/PREDICTED: suberization-associated anionic peroxidase 2-like [Solanum lycopersicum]
Solyc04g077470	436.125	982.853	1.17223	0.00063354	0.0142939	K13680|1|9e-128|456|smo:SELMODRAFT_230176|beta-mannan synthase [EC:2.4.1.32]	GO:0009506//plasmodesma;GO:0005794//Golgi apparatus	GO:0016760//cellulose synthase (UDP-forming) activity	-	gi|460384734|ref|XP_004238064.1|/0/PREDICTED: probable xyloglucan glycosyltransferase 12-like [Solanum lycopersicum]
Solyc08g075120	104.434	235.128	1.17086	0.0031471	0.047789	-	GO:0005739//mitochondrion	GO:0005089//Rho guanyl-nucleotide exchange factor activity	GO:0080092//regulation of pollen tube growth;GO:0019344//cysteine biosynthetic process	gi|460401013|ref|XP_004246024.1|/0/PREDICTED: rho guanine nucleotide exchange factor 8-like isoform 1 [Solanum lycopersicum]
Solyc02g084610	368.035	828.524	1.1707	0.000846528	0.0178648	K13420|1|8e-38|156|vvi:100253808|LRR receptor-like serine/threonine-protein kinase FLS2 [EC:2.7.11.1]	GO:0005886//plasma membrane	GO:0016491//oxidoreductase activity	GO:0007165//signal transduction;GO:0008152//metabolic process	gi|460373293|ref|XP_004232455.1|/0/PREDICTED: LRR receptor-like serine/threonine-protein kinase GSO1-like [Solanum lycopersicum]
Solyc03g093410	440.37	991.051	1.17024	0.000714687	0.0156477	K08150|1|2e-53|208|vvi:100268023|MFS transporter, SP family, solute carrier family 2 (myo-inositol transporter), member 13	GO:0016021//integral to membrane	GO:0022891//substrate-specific transmembrane transporter activity;GO:0032440//2-alkenal reductase [NAD(P)] activity	GO:0055114//oxidation-reduction process;GO:0055085//transmembrane transport;GO:0008643//carbohydrate transport	gi|460378840|ref|XP_004235176.1|/0/PREDICTED: hexose carrier protein HEX6-like [Solanum lycopersicum]
Solyc09g009540	514.771	1158.35	1.17007	0.000680574	0.0151049	-	-	-	-	gi|460402072|ref|XP_004246538.1|/0/PREDICTED: uncharacterized protein LOC101261444 [Solanum lycopersicum]
Solyc01g094750	124.256	279.264	1.16831	0.00267344	0.0423045	K15398|1|0.0|908|vvi:100249915|cytochrome P450, family 86, subfamily A, polypeptide 2/4/7/8 (fatty acid omega-hydroxylase) [EC:1.14.-.-]	GO:0005576//extracellular region	GO:0009055//electron carrier activity;GO:0005506//iron ion binding;GO:0005515//protein binding;GO:0020037//heme binding;GO:0019825//oxygen binding;GO:0018685//alkane 1-monooxygenase activity	GO:0006631//fatty acid metabolic process;GO:0055114//oxidation-reduction process	gi|460368154|ref|XP_004229934.1|/0/PREDICTED: cytochrome P450 86A2-like [Solanum lycopersicum]
Solyc07g006570	3038.2	6826.69	1.16797	0.000413982	0.0102756	K01166|1|5e-16|82.8|ath:AT1G14220|ribonuclease T2 [EC:3.1.27.1]	-	-	-	gi|460394145|ref|XP_004242665.1|/4.02224e-144/PREDICTED: ribonuclease 3-like [Solanum lycopersicum]
Solyc02g070020	103.958	233.583	1.16793	0.00285302	0.0443318	K13496|1|3e-44|177|ath:AT2G36800|UDP-glucosyl transferase 73C [EC:2.4.1.-]	GO:0005576//extracellular region;GO:0005829//cytosol	GO:0016758//transferase activity, transferring hexosyl groups	GO:0006914//autophagy	gi|460374714|ref|XP_004233155.1|/0/PREDICTED: UDP-glycosyltransferase 91C1-like [Solanum lycopersicum]
Solyc02g077370	317.606	712.762	1.16618	0.00087954	0.0183177	K14516|1|2e-31|132|rcu:RCOM_1007740|ethylene-responsive transcription factor 1;K09286|4|5e-29|124|ath:AT4G17500|EREBP-like factor	GO:0005634//nucleus	GO:0003700//sequence-specific DNA binding transcription factor activity;GO:0003677//DNA binding	GO:0006952//defense response;GO:0006355//regulation of transcription, DNA-dependent	gi|350539681|ref|NP_001233987.1|/1.59975e-88/pathogenesis-related genes transcriptional activator PTI5 [Solanum lycopersicum]
Solyc02g080220	4404.15	9874.8	1.16489	0.000385944	0.00968175	K01051|1|0.0|720|rcu:RCOM_0905530|pectinesterase [EC:3.1.1.11]	GO:0005829//cytosol;GO:0009505//plant-type cell wall;GO:0005774//vacuolar membrane	GO:0045330;GO:0030599//pectinesterase activity;GO:0004857//enzyme inhibitor activity	GO:0042545//cell wall modification;GO:0052546//cell wall pectin metabolic process;GO:0043086//negative regulation of catalytic activity;GO:0045490//pectin catabolic process;GO:0052541//plant-type cell wall cellulose metabolic process	gi|460373875|ref|XP_004232738.1|/0/PREDICTED: pectinesterase/pectinesterase inhibitor 18-like isoform 1 [Solanum lycopersicum]
Solyc09g082690	394.078	882.867	1.16371	0.000837446	0.0177237	-	GO:0009507//chloroplast	GO:0016168//chlorophyll binding	GO:0009744//response to sucrose stimulus;GO:0009409//response to cold;GO:0010224//response to UV-B;GO:0009718//anthocyanin-containing compound biosynthetic process;GO:0080167//response to karrikin	gi|46401440|gb|AAS92268.1|/9.41488e-104/early light inducible protein [Solanum lycopersicum]
Solyc09g007940	419.693	939.742	1.16293	0.000829546	0.01759	K00856|1|8e-178|620|rcu:RCOM_0262240|adenosine kinase [EC:2.7.1.20]	GO:0009507//chloroplast;GO:0005886//plasma membrane;GO:0048046//apoplast	GO:0004001//adenosine kinase activity;GO:0005507//copper ion binding;GO:0016773//phosphotransferase activity, alcohol group as acceptor	GO:0006166//purine ribonucleoside salvage;GO:0080094//response to trehalose-6-phosphate stimulus;GO:0006167//AMP biosynthetic process;GO:0016310//phosphorylation;GO:0046686//response to cadmium ion	gi|460402303|ref|XP_004246653.1|/0/PREDICTED: adenosine kinase 2-like [Solanum lycopersicum]
Solyc05g008800	338.059	756.686	1.16242	0.00100858	0.0202871	-	GO:0005737//cytoplasm;GO:0005887//integral to plasma membrane	GO:0008195//phosphatidate phosphatase activity;GO:0003993//acid phosphatase activity	GO:0008152//metabolic process;GO:0009738//abscisic acid mediated signaling pathway	gi|460386404|ref|XP_004238888.1|/7.95029e-178/PREDICTED: lipid phosphate phosphatase 2-like [Solanum lycopersicum]
Solyc06g052070	332.108	743.338	1.16237	0.00100473	0.0202598	K14963|1|2e-23|109|aly:ARALYDRAFT_485324|COMPASS component SWD3	-	-	-	gi|460390696|ref|XP_004240961.1|/0/PREDICTED: WD repeat-containing protein 44-like [Solanum lycopersicum]
Solyc03g119960	197.971	442.85	1.16153	0.00151157	0.0276885	-	GO:0005886//plasma membrane	GO:0004871//signal transducer activity	GO:0019252//starch biosynthetic process;GO:0000023//maltose metabolic process;GO:0009416//response to light stimulus	gi|460379955|ref|XP_004235724.1|/0/PREDICTED: root phototropism protein 3-like [Solanum lycopersicum]
Solyc04g082750	163.689	365.71	1.15974	0.00208406	0.0351049	K07748|1|1e-48|192|ath:AT1G47290|sterol-4alpha-carboxylate 3-dehydrogenase (decarboxylating) [EC:1.1.1.170]	GO:0005783//endoplasmic reticulum	GO:0003854//3-beta-hydroxy-delta5-steroid dehydrogenase activity;GO:0047012//sterol-4-alpha-carboxylate 3-dehydrogenase (decarboxylating) activity;GO:0016853//isomerase activity;GO:0000166//nucleotide binding	GO:0006694//steroid biosynthetic process;GO:0055114//oxidation-reduction process	gi|460385533|ref|XP_004238458.1|/0/PREDICTED: short-chain dehydrogenase/reductase family 42E member 1-like [Solanum lycopersicum]
Solyc10g076480	963.008	2150.34	1.15895	0.000570363	0.0131902	K03320|1|0.0|816|mtr:MTR_7g069640|ammonium transporter, Amt family	GO:0005886//plasma membrane;GO:0016021//integral to membrane	GO:0015398//high affinity secondary active ammonium transmembrane transporter activity	GO:0072488//ammonium transmembrane transport;GO:0009624//response to nematode	gi|460407252|ref|XP_004249068.1|/0/PREDICTED: ammonium transporter 3 member 1-like [Solanum lycopersicum]
Solyc02g082260	1416.02	3160.34	1.15824	0.000528491	0.0124952	K00021|1|0.0|891|vvi:100265082|hydroxymethylglutaryl-CoA reductase (NADPH) [EC:1.1.1.34]	GO:0016021//integral to membrane;GO:0005789//endoplasmic reticulum membrane	GO:0004420//hydroxymethylglutaryl-CoA reductase (NADPH) activity;GO:0050661//NADP binding	GO:0015936//coenzyme A metabolic process;GO:0055114//oxidation-reduction process;GO:0008299//isoprenoid biosynthetic process	gi|460373579|ref|XP_004232593.1|/0/PREDICTED: 3-hydroxy-3-methylglutaryl-coenzyme A reductase 1 [Solanum lycopersicum]
Solyc08g076390	620.055	1383.61	1.15797	0.000691179	0.0152533	K11446|1|9e-58|223|mtr:MTR_5g010300|histone demethylase JARID1 [EC:1.14.11.-]	GO:0005634//nucleus	GO:0003700//sequence-specific DNA binding transcription factor activity	GO:0006355//regulation of transcription, DNA-dependent;GO:0010200//response to chitin	gi|460401357|ref|XP_004246192.1|/0/PREDICTED: uncharacterized protein LOC101264047 [Solanum lycopersicum]
Solyc02g083880	303.723	676.623	1.1556	0.00129062	0.0245226	-	-	-	-	gi|460373364|ref|XP_004232490.1|/2.67031e-59/PREDICTED: snakin-2-like [Solanum lycopersicum]
Solyc01g103510	377.079	838.697	1.15329	0.000855174	0.0179889	K02925|1|0.0|751|rcu:RCOM_0759150|large subunit ribosomal protein L3e	GO:0005730//nucleolus;GO:0005773//vacuole;GO:0005886//plasma membrane;GO:0005618//cell wall;GO:0022625//cytosolic large ribosomal subunit	GO:0003735//structural constituent of ribosome	GO:0006412//translation	gi|460369196|ref|XP_004230449.1|/0/PREDICTED: 60S ribosomal protein L3-like [Solanum lycopersicum]
Solyc02g093210	343.54	763.689	1.15251	0.000975065	0.0198841	-	GO:0046658//anchored to plasma membrane	GO:0008081//phosphoric diester hydrolase activity	GO:0006629//lipid metabolic process	gi|460375621|ref|XP_004233603.1|/0/PREDICTED: PI-PLC X domain-containing protein At5g67130-like [Solanum lycopersicum]
Solyc05g009100	109.803	243.995	1.15193	0.00320674	0.0483319	K10576|1|1e-82|306|vvi:100250088|ubiquitin-conjugating enzyme E2 H [EC:6.3.2.19];K13415|2|8e-64|243|osa:4324691|protein brassinosteroid insensitive 1 [EC:2.7.10.1 2.7.11.1]	GO:0016021//integral to membrane;GO:0005576//extracellular region	GO:0005524//ATP binding;GO:0004674//protein serine/threonine kinase activity	GO:0006468//protein phosphorylation;GO:0007169//transmembrane receptor protein tyrosine kinase signaling pathway	gi|460386448|ref|XP_004238910.1|/0/PREDICTED: probable leucine-rich repeat receptor-like protein kinase At1g68400-like [Solanum lycopersicum]
Solyc03g071570	355.711	790.384	1.15185	0.000953976	0.0195178	K01728|1|0.0|689|gmx:100808438|pectate lyase [EC:4.2.2.2]	-	GO:0030570//pectate lyase activity	GO:0042547//cell wall modification involved in multidimensional cell growth;GO:0009814//defense response, incompatible interaction	gi|460378298|ref|XP_004234910.1|/0/PREDICTED: probable pectate lyase 13-like [Solanum lycopersicum]
Solyc11g069190	702.64	1560.39	1.15105	0.000728639	0.0158905	K14486|1|1e-139|495|vvi:100245251|auxin response factor	GO:0005634//nucleus	GO:0003677//DNA binding;GO:0046983//protein dimerization activity;GO:0003700//sequence-specific DNA binding transcription factor activity	GO:0006355//regulation of transcription, DNA-dependent;GO:0010050//vegetative phase change;GO:0010158//abaxial cell fate specification;GO:0009734//auxin mediated signaling pathway	gi|350537149|ref|NP_001233771.1|/0/auxin response factor 4 [Solanum lycopersicum]
Solyc01g106620	1652.28	3668.03	1.15055	0.000500832	0.0119559	K13449|1|3e-62|235|rcu:RCOM_1381930|pathogenesis-related protein 1	GO:0005576//extracellular region	-	GO:0009607//response to biotic stimulus;GO:0006952//defense response	gi|350538759|ref|NP_001234358.1|/4.12334e-108/PR1 protein precursor [Solanum lycopersicum]
Solyc02g081850	487.244	1080.55	1.14905	0.000855598	0.0179889	K03294|1|5e-154|542|sbi:SORBI_08g021380|basic amino acid/polyamine antiporter, APA family	GO:0005886//plasma membrane;GO:0016021//integral to membrane	GO:0015326//cationic amino acid transmembrane transporter activity;GO:0015189//L-lysine transmembrane transporter activity;GO:0015181//arginine transmembrane transporter activity;GO:0005313//L-glutamate transmembrane transporter activity	GO:0043091//L-arginine import;GO:0003333//amino acid transmembrane transport;GO:0015819//lysine transport;GO:0051938//L-glutamate import	gi|460373649|ref|XP_004232627.1|/0/PREDICTED: cationic amino acid transporter 5-like [Solanum lycopersicum]
Solyc01g096080	282.313	624.312	1.14497	0.00129124	0.0245226	-	-	-	-	gi|460368277|ref|XP_004229994.1|/1.40061e-120/PREDICTED: uncharacterized protein At4g00950-like [Solanum lycopersicum]
Solyc11g066150	227.619	503.048	1.14407	0.00185139	0.032263	K01710|1|1e-121|434|cme:CME136C|dTDP-glucose 4,6-dehydratase [EC:4.2.1.46];K12449|2|1e-27|122|zma:100282841|UDP-apiose/xylose synthase	GO:0005886//plasma membrane	GO:0048040//UDP-glucuronate decarboxylase activity;GO:0050662//coenzyme binding;GO:0000166//nucleotide binding	GO:0044237//cellular metabolic process;GO:0042732//D-xylose metabolic process	gi|460411131|ref|XP_004250968.1|/0/PREDICTED: UDP-glucuronic acid decarboxylase 1-like [Solanum lycopersicum]
Solyc01g079950	1235.38	2729.71	1.14379	0.000616131	0.0140004	K00924|1|1e-10|66.2|ath:AT5G22850|[EC:2.7.1.-]	-	-	-	gi|460367136|ref|XP_004229431.1|/0/PREDICTED: basic 7S globulin-like [Solanum lycopersicum]
Solyc05g010120	651.726	1439.34	1.14307	0.00083111	0.0176064	K01530|1|0.0|1842|vvi:100256123|phospholipid-translocating ATPase [EC:3.6.3.1]	GO:0016021//integral to membrane;GO:0009941//chloroplast envelope;GO:0005886//plasma membrane	GO:0015662//ATPase activity, coupled to transmembrane movement of ions, phosphorylative mechanism;GO:0019829//cation-transporting ATPase activity;GO:0005524//ATP binding;GO:0000287//magnesium ion binding;GO:0004012//phospholipid-translocating ATPase activity	GO:0015914//phospholipid transport;GO:0008152//metabolic process;GO:0006812//cation transport	gi|460386593|ref|XP_004238982.1|/0/PREDICTED: putative phospholipid-transporting ATPase 9-like [Solanum lycopersicum]
Solyc06g053610	154.12	340.342	1.14293	0.00287983	0.0446162	K09422|1|3e-75|279|pop:POPTR_832837|myb proto-oncogene protein, plant	-	GO:0003677//DNA binding;GO:0003682//chromatin binding	-	gi|350536735|ref|NP_001234262.1|/1.55407e-155/myb-related transcription factor [Solanum lycopersicum]
Solyc11g073250	2380.37	5253.76	1.14216	0.000551734	0.0128397	K11251|1|2e-72|268|gmx:100784431|histone H2A	GO:0000786//nucleosome;GO:0005634//nucleus	GO:0003677//DNA binding;GO:0046982//protein heterodimerization activity	GO:0006334//nucleosome assembly	gi|460411856|ref|XP_004251320.1|/2.58101e-78/PREDICTED: histone H2A-like [Solanum lycopersicum]
Solyc02g080040	180.485	397.804	1.14018	0.00207118	0.0350008	K13430|1|5e-64|243|sbi:SORBI_04g020990|serine/threonine-protein kinase PBS1 [EC:2.7.11.1]	GO:0044464//cell part	GO:0004672//protein kinase activity;GO:0000166//nucleotide binding	-	gi|18076583|emb|CAC84552.1|/0/putative receptor-like serine-threonine protein kinase [Solanum tuberosum]
Solyc04g063350	164.435	362.166	1.13914	0.00238201	0.0387422	K00166|1|8e-175|611|zma:100191513|2-oxoisovalerate dehydrogenase E1 component, alpha subunit [EC:1.2.4.4]	GO:0005739//mitochondrion	GO:0003863//3-methyl-2-oxobutanoate dehydrogenase (2-methylpropanoyl-transferring) activity	GO:0055114//oxidation-reduction process	gi|460384006|ref|XP_004237706.1|/0/PREDICTED: 2-oxoisovalerate dehydrogenase subunit alpha, mitochondrial-like [Solanum lycopersicum]
Solyc07g041720	53935.6	118781	1.13899	0.000472708	0.0114695	-	GO:0048046//apoplast	GO:0004784//superoxide dismutase activity;GO:0045735//nutrient reservoir activity;GO:0030145//manganese ion binding	GO:0055114//oxidation-reduction process	gi|460396303|ref|XP_004243715.1|/5.10023e-115/PREDICTED: auxin-binding protein ABP19a-like [Solanum lycopersicum]
Solyc02g093230	477.308	1050.74	1.13841	0.000931345	0.0191871	K00588|1|3e-128|455|vvi:100243978|caffeoyl-CoA O-methyltransferase [EC:2.1.1.104]	-	GO:0008171//O-methyltransferase activity	GO:0032259//methylation	gi|460372071|ref|XP_004231857.1|/9.51781e-138/PREDICTED: caffeoyl-CoA O-methyltransferase-like [Solanum lycopersicum]
Solyc01g073820	515.088	1133.5	1.13789	0.000980203	0.0199099	-	-	-	GO:0044763;GO:0071702;GO:0006820//anion transport;GO:0071705;GO:0006950//response to stress	gi|460366960|ref|XP_004229343.1|/2.22034e-159/PREDICTED: uncharacterized protein LOC101249296 [Solanum lycopersicum]
Solyc02g077330	899.543	1972.58	1.13282	0.000819416	0.0174418	K00514|1|2e-25|114|rcu:RCOM_1428040|zeta-carotene desaturase [EC:1.3.5.6];K01206|2|8e-20|96.3|ath:AT1G67830|alpha-L-fucosidase [EC:3.2.1.51]	GO:0005576//extracellular region	GO:0004091//carboxylesterase activity	GO:0000038//very long-chain fatty acid metabolic process;GO:0042335//cuticle development	gi|460374294|ref|XP_004232946.1|/0/PREDICTED: GDSL esterase/lipase At5g45950-like [Solanum lycopersicum]
Solyc07g020800	122.506	268.014	1.12945	0.00318069	0.0480698	K04392|1|4e-110|395|vvi:100266265|Ras-related C3 botulinum toxin substrate 1	GO:0005622//intracellular;GO:0005576//extracellular region;GO:0005886//plasma membrane	GO:0004767//sphingomyelin phosphodiesterase activity;GO:0003924//GTPase activity;GO:0005525//GTP binding	GO:0007015//actin filament organization;GO:0007264//small GTPase mediated signal transduction;GO:0006184//GTP catabolic process;GO:0015031//protein transport	gi|460394706|ref|XP_004242938.1|/5.77267e-111/PREDICTED: rac-like GTP-binding protein ARAC7-like [Solanum lycopersicum]
Solyc07g008710	348.064	761.322	1.12915	0.00107339	0.0213916	-	GO:0005737//cytoplasm;GO:0043231//intracellular membrane-bounded organelle	-	-	gi|460394447|ref|XP_004242814.1|/5.22051e-92/PREDICTED: MLP-like protein 34-like [Solanum lycopersicum]
Solyc11g012040	133.557	291.939	1.12821	0.00333473	0.0497542	-	-	GO:0004221//ubiquitin thiolesterase activity	GO:0006511//ubiquitin-dependent protein catabolic process	gi|460409642|ref|XP_004250247.1|/0/PREDICTED: uncharacterized membrane protein At1g16860-like [Solanum lycopersicum]
Solyc04g007580	2901.9	6342.03	1.12795	0.000622817	0.0141051	-	-	-	-	gi|460382597|ref|XP_004237025.1|/9.33843e-87/PREDICTED: uncharacterized protein LOC101267223 [Solanum lycopersicum]
Solyc01g086920	2279.75	4981.03	1.12757	0.000685139	0.0151502	K13420|1|9e-27|117|rcu:RCOM_0633880|LRR receptor-like serine/threonine-protein kinase FLS2 [EC:2.7.11.1]	-	GO:0016301//kinase activity;GO:0032440//2-alkenal reductase [NAD(P)] activity	GO:0016310//phosphorylation;GO:0055114//oxidation-reduction process	gi|460367497|ref|XP_004229610.1|/1.17858e-89/PREDICTED: DNA-damage-repair/toleration protein DRT100-like [Solanum lycopersicum]
Solyc03g096290	15520.5	33845.6	1.12479	0.000623267	0.0141051	K09872|1|1e-145|513|osa:4330248|aquaporin PIP	GO:0009941//chloroplast envelope;GO:0005773//vacuole;GO:0046658//anchored to plasma membrane;GO:0016021//integral to membrane;GO:0005739//mitochondrion	GO:0005215//transporter activity	GO:0009414//response to water deprivation;GO:0006833//water transport;GO:0009651//response to salt stress	gi|460379006|ref|XP_004235256.1|/1.7587e-163/PREDICTED: probable aquaporin PIP1-2-like isoform 2 [Solanum lycopersicum]
Solyc01g091590	7956.8	17312	1.12151	0.000692749	0.0152728	-	-	-	-	gi|460370661|ref|XP_004231169.1|/3.41841e-98/PREDICTED: BON1-associated protein 2-like [Solanum lycopersicum]
Solyc04g072850	505.73	1100.31	1.12147	0.00123133	0.0237033	K15920|1|0.0|767|sbi:SORBI_06g030270|beta-D-xylosidase 4 [EC:3.2.1.37];K05349|3|0.0|759|vvi:100252178|beta-glucosidase [EC:3.2.1.21]	GO:0009505//plant-type cell wall;GO:0009506//plasmodesma;GO:0009507//chloroplast;GO:0048046//apoplast	GO:0008422//beta-glucosidase activity	GO:0010075//regulation of meristem growth;GO:0005975//carbohydrate metabolic process	gi|371917286|dbj|BAL44719.1|/0/SlArf/Xyl4 [Solanum lycopersicum]
Solyc01g067740	4114.16	8947.21	1.12084	0.000596351	0.0136773	K04565|1|3e-78|288|pop:POPTR_595511|Cu/Zn superoxide dismutase [EC:1.15.1.1]	GO:0005737//cytoplasm	GO:0046872//metal ion binding;GO:0004784//superoxide dismutase activity	GO:0006801//superoxide metabolic process;GO:0055114//oxidation-reduction process	gi|3334337|sp|Q43779.3|SODC2_SOLLC/2.67795e-84/RecName: Full=Superoxide dismutase [Cu-Zn] 2
Solyc03g123620	2443.21	5303.59	1.11819	0.000776246	0.0166829	K01051|1|9e-117|419|vvi:100251413|pectinesterase [EC:3.1.1.11]	GO:0009506//plasmodesma;GO:0005768//endosome;GO:0009505//plant-type cell wall;GO:0005774//vacuolar membrane;GO:0005802//trans-Golgi network;GO:0005576//extracellular region;GO:0005794//Golgi apparatus;GO:0005634//nucleus;GO:0005886//plasma membrane	GO:0046910//pectinesterase inhibitor activity;GO:0030599//pectinesterase activity	GO:0015706//nitrate transport;GO:0010167//response to nitrate;GO:0008152//metabolic process	gi|460379553|ref|XP_004235526.1|/0/PREDICTED: pectinesterase 3-like [Solanum lycopersicum]
Solyc02g080210	2975.8	6452.99	1.11669	0.000750307	0.0162672	K01051|1|0.0|726|rcu:RCOM_0905530|pectinesterase [EC:3.1.1.11]	GO:0005829//cytosol;GO:0009505//plant-type cell wall;GO:0005774//vacuolar membrane;GO:0005886//plasma membrane	GO:0045330;GO:0030599//pectinesterase activity;GO:0004857//enzyme inhibitor activity	GO:0042545//cell wall modification;GO:0052546//cell wall pectin metabolic process;GO:0043086//negative regulation of catalytic activity;GO:0045490//pectin catabolic process;GO:0052541//plant-type cell wall cellulose metabolic process	gi|460373872|ref|XP_004232737.1|/0/PREDICTED: pectinesterase/pectinesterase inhibitor 18-like [Solanum lycopersicum]
Solyc02g079780	839.644	1818.82	1.11515	0.00104101	0.0208587	-	-	-	-	gi|460373924|ref|XP_004232762.1|/0/PREDICTED: uncharacterized protein LOC101267957 [Solanum lycopersicum]
Solyc01g104580	210.085	454.871	1.11449	0.00246804	0.0397338	-	GO:0005886//plasma membrane	-	-	gi|460369568|ref|XP_004230634.1|/1.26703e-125/PREDICTED: uncharacterized protein LOC101244424 [Solanum lycopersicum]
Solyc01g110920	208.07	450.428	1.11423	0.00216526	0.0361112	K14488|1|1e-29|125|pop:POPTR_649290|SAUR family protein	-	-	-	gi|460370285|ref|XP_004230984.1|/1.10765e-41/PREDICTED: auxin-induced protein 15A-like [Solanum lycopersicum]
Solyc08g016150	1290.05	2783.7	1.10958	0.000751139	0.0162693	-	-	-	-	gi|12003398|gb|AAG43556.1|AF211538_1/4.46465e-14/Avr9/Cf-9 rapidly elicited protein 180 [Nicotiana tabacum]
Solyc12g008960	268.703	579.794	1.10953	0.002115	0.0354378	-	-	-	GO:0010200//response to chitin;GO:0010197//polar nucleus fusion;GO:0006829//zinc ion transport	gi|460412580|ref|XP_004251676.1|/0/PREDICTED: uncharacterized protein LOC101245524 [Solanum lycopersicum]
Solyc08g077560	831.304	1792.72	1.1087	0.00108659	0.0215558	K00924|1|2e-127|454|aly:ARALYDRAFT_494273|[EC:2.7.1.-];K05658|5|3e-90|330|vvi:100262734|ATP-binding cassette, subfamily B (MDR/TAP), member 1	GO:0005886//plasma membrane	GO:0004714//transmembrane receptor protein tyrosine kinase activity;GO:0005524//ATP binding;GO:0004674//protein serine/threonine kinase activity	GO:0006468//protein phosphorylation	gi|460400640|ref|XP_004245841.1|/0/PREDICTED: probable receptor-like protein kinase At5g47070-like [Solanum lycopersicum]
Solyc06g005480	231.239	497.364	1.10491	0.00227356	0.0374168	-	GO:0009536//plastid	-	GO:0052542//defense response by callose deposition;GO:0035556//intracellular signal transduction;GO:0009693//ethylene biosynthetic process;GO:0009611//response to wounding;GO:0002679//respiratory burst involved in defense response;GO:0010200//response to chitin;GO:0030968//endoplasmic reticulum unfolded protein response;GO:0009612//response to mechanical stimulus	gi|460389440|ref|XP_004240360.1|/0/PREDICTED: uncharacterized protein LOC101253593 [Solanum lycopersicum]
Solyc03g044150	3593.84	7727.22	1.10442	0.000822494	0.0174906	K11262|1|5e-07|55.1|aly:ARALYDRAFT_473714|acetyl-CoA carboxylase / biotin carboxylase [EC:6.4.1.2 6.3.4.14]	GO:0009505//plant-type cell wall;GO:0048046//apoplast	GO:0042802//identical protein binding;GO:0004252//serine-type endopeptidase activity	GO:0048359//mucilage metabolic process involved seed coat development;GO:0080001//mucilage extrusion from seed coat;GO:0006508//proteolysis;GO:0043086//negative regulation of catalytic activity	gi|460377760|ref|XP_004234656.1|/0/PREDICTED: subtilisin-like protease-like [Solanum lycopersicum]
Solyc02g092980	520.157	1118.02	1.10392	0.00106917	0.0213267	K14505|1|1e-112|404|vvi:100267897|cyclin D3, plant	GO:0005634//nucleus	-	-	gi|350537707|ref|NP_001233794.1|/0/cyclin D3.1 [Solanum lycopersicum]
Solyc06g009190	1262.54	2710.2	1.10207	0.000954748	0.0195178	K01051|1|0.0|749|vvi:100245304|pectinesterase [EC:3.1.1.11]	GO:0005618//cell wall	GO:0030599//pectinesterase activity;GO:0045330;GO:0004857//enzyme inhibitor activity	GO:0042545//cell wall modification;GO:0043086//negative regulation of catalytic activity;GO:0045490//pectin catabolic process	gi|460389832|ref|XP_004240552.1|/0/PREDICTED: probable pectinesterase/pectinesterase inhibitor 40-like [Solanum lycopersicum]
Solyc09g059430	628.13	1348.04	1.10173	0.00127877	0.024369	K13456|1|8e-73|271|vvi:100258114|RPM1-interacting protein 4	-	-	-	gi|460403159|ref|XP_004247064.1|/1.59066e-146/PREDICTED: RPM1-interacting protein 4-like [Solanum lycopersicum]
Solyc01g056780	4504.69	9667.37	1.1017	0.000672596	0.0150073	-	GO:0005840//ribosome;GO:0009507//chloroplast	GO:0003735//structural constituent of ribosome	GO:0042254//ribosome biogenesis;GO:0006412//translation	gi|460366365|ref|XP_004229053.1|/2.42757e-83/PREDICTED: 50S ribosomal protein L34, chloroplastic-like [Solanum lycopersicum]
Solyc03g120850	1077.91	2312.06	1.10094	0.00100883	0.0202871	K04077|1|0.0|910|bdi:100842360|chaperonin GroEL	GO:0005739//mitochondrion;GO:0005730//nucleolus;GO:0009941//chloroplast envelope;GO:0009570//chloroplast stroma;GO:0022626//cytosolic ribosome;GO:0005794//Golgi apparatus;GO:0005886//plasma membrane;GO:0010319//stromule;GO:0048046//apoplast	GO:0005524//ATP binding;GO:0005515//protein binding	GO:0042026//protein refolding;GO:0008219//cell death;GO:0051085//chaperone mediated protein folding requiring cofactor;GO:0009409//response to cold;GO:0016117//carotenoid biosynthetic process;GO:0009627//systemic acquired resistance	gi|460379814|ref|XP_004235655.1|/0/PREDICTED: ruBisCO large subunit-binding protein subunit beta, chloroplastic-like [Solanum lycopersicum]
Solyc09g072810	165.659	355.073	1.0999	0.00319017	0.0481148	K13420|1|6e-173|607|pop:POPTR_1075175|LRR receptor-like serine/threonine-protein kinase FLS2 [EC:2.7.11.1]	GO:0016023//cytoplasmic membrane-bounded vesicle;GO:0016020//membrane	GO:0004672//protein kinase activity;GO:0016491//oxidoreductase activity;GO:0000166//nucleotide binding	GO:0006468//protein phosphorylation;GO:0000165//MAPK cascade	gi|460404056|ref|XP_004247501.1|/0/PREDICTED: probable LRR receptor-like serine/threonine-protein kinase At4g08850-like [Solanum lycopersicum]
Solyc11g071810	540.711	1158.79	1.0997	0.00130955	0.0248066	-	-	-	-	gi|350539381|ref|NP_001234390.1|/7.54689e-99/FAS protein [Solanum lycopersicum]
Solyc12g057140	1402.33	3003.81	1.09897	0.00117637	0.0228585	K01051|1|2e-12|68.9|gmx:100776781|pectinesterase [EC:3.1.1.11];K01115|4|3e-10|62.0|vcn:VOLCADRAFT_99471|phospholipase D [EC:3.1.4.4]	-	-	GO:0050896//response to stimulus	gi|460414334|ref|XP_004252527.1|/2.53835e-70/PREDICTED: uncharacterized protein LOC101246605 [Solanum lycopersicum]
Solyc06g050500	1100.96	2358.26	1.09896	0.00113726	0.022237	K14496|1|8e-79|291|vvi:100267073|abscisic acid receptor PYR/PYL family	-	-	GO:0009738//abscisic acid mediated signaling pathway	gi|460390986|ref|XP_004241105.1|/1.21679e-158/PREDICTED: abscisic acid receptor PYL6-like [Solanum lycopersicum]
Solyc01g010020	494.06	1056.93	1.09712	0.00120803	0.0233415	K13448|1|3e-70|261|pop:POPTR_658975|calcium-binding protein CML	GO:0005794//Golgi apparatus	GO:0005509//calcium ion binding;GO:0032440//2-alkenal reductase [NAD(P)] activity	GO:0010200//response to chitin;GO:0055114//oxidation-reduction process	gi|460365065|ref|XP_004228426.1|/1.65548e-85/PREDICTED: probable calcium-binding protein CML16-like [Solanum lycopersicum]
Solyc11g012240	415.337	888.224	1.09664	0.00159126	0.0288624	-	-	-	-	gi|470114309|ref|XP_004293358.1|/1.43917e-107/PREDICTED: acyl-CoA--sterol O-acyltransferase 1-like [Fragaria vesca subsp. vesca]
Solyc04g074420	1123.8	2401.98	1.09583	0.00126043	0.0240816	-	GO:0009505//plant-type cell wall	-	GO:0009741//response to brassinosteroid stimulus	gi|460416337|ref|XP_004253500.1|/1.69733e-45/PREDICTED: uncharacterized protein LOC101268088, partial [Solanum lycopersicum]
Solyc03g096460	1146.04	2448.28	1.09512	0.00111772	0.0220182	-	-	-	-	gi|350537023|ref|NP_001234532.1|/6.42663e-107/wound/stress protein precursor [Solanum lycopersicum]
Solyc08g081230	1647.91	3518.81	1.09445	0.000943097	0.0193868	-	GO:0008076//voltage-gated potassium channel complex;GO:0005634//nucleus	GO:0005249//voltage-gated potassium channel activity	GO:0051260//protein homooligomerization;GO:0006813//potassium ion transport	gi|460400137|ref|XP_004245592.1|/0/PREDICTED: BTB/POZ domain-containing protein At5g41330-like [Solanum lycopersicum]
Solyc03g034370	739.196	1577.42	1.09354	0.000863043	0.0180759	-	GO:0005576//extracellular region	GO:0008289//lipid binding	GO:0006869//lipid transport	gi|460377596|ref|XP_004234577.1|/4.37073e-25/PREDICTED: probable non-specific lipid-transfer protein AKCS9-like [Solanum lycopersicum]
Solyc06g073740	508.394	1082.77	1.09071	0.00155699	0.0284033	K01188|1|0.0|716|pop:POPTR_804519|beta-glucosidase [EC:3.2.1.21]	GO:0009505//plant-type cell wall;GO:0009506//plasmodesma;GO:0005576//extracellular region;GO:0016020//membrane;GO:0005829//cytosol	GO:0008422//beta-glucosidase activity	GO:0009627//systemic acquired resistance;GO:0005975//carbohydrate metabolic process;GO:0034976//response to endoplasmic reticulum stress	gi|460391527|ref|XP_004241372.1|/0/PREDICTED: lysosomal beta glucosidase-like isoform 1 [Solanum lycopersicum]
Solyc12g007050	2033.18	4324.74	1.08888	0.00095089	0.0194748	-	GO:0031225//anchored to membrane;GO:0005886//plasma membrane	-	GO:0009612//response to mechanical stimulus;GO:0010106//cellular response to iron ion starvation;GO:0015706//nitrate transport;GO:0006826//iron ion transport;GO:0010054//trichoblast differentiation;GO:0006569//tryptophan catabolic process;GO:0010167//response to nitrate;GO:0009684//indoleacetic acid biosynthetic process;GO:0016132//brassinosteroid biosynthetic process	gi|460412426|ref|XP_004251602.1|/1.30508e-29/PREDICTED: arabinogalactan peptide 20-like [Solanum lycopersicum]
Solyc09g007760	793.635	1686.39	1.08739	0.00124998	0.0239437	K09872|1|9e-139|491|rcu:RCOM_1356060|aquaporin PIP	GO:0005773//vacuole;GO:0005886//plasma membrane;GO:0016021//integral to membrane;GO:0009507//chloroplast	GO:0005215//transporter activity	GO:0009269//response to desiccation;GO:0006833//water transport;GO:0006970//response to osmotic stress;GO:0080170//hydrogen peroxide transmembrane transport;GO:0009737//response to abscisic acid stimulus	gi|460408108|ref|XP_004249489.1|/2.3249e-140/PREDICTED: aquaporin PIP2-1-like [Solanum lycopersicum]
Solyc05g012790	418.586	888.981	1.08663	0.00158914	0.0288476	K06674|1|6e-09|61.2|vcn:VOLCADRAFT_106052|structural maintenance of chromosome 2;K14423|2|3e-08|58.9|aly:ARALYDRAFT_329352|4,4-dimethyl-9beta,19-cyclopropylsterol-4alpha-methyl oxidase [EC:1.14.13.72]	-	GO:0008270//zinc ion binding	-	gi|460386812|ref|XP_004239090.1|/0/PREDICTED: probable S-acyltransferase At1g69420-like [Solanum lycopersicum]
Solyc06g062580	203.018	430.618	1.0848	0.00316497	0.0478664	K12309|1|0.0|1054|aly:ARALYDRAFT_485655|beta-galactosidase [EC:3.2.1.23];K01190|3|2e-62|239|cme:CMP078C|beta-galactosidase [EC:3.2.1.23]	GO:0005829//cytosol;GO:0009506//plasmodesma;GO:0009505//plant-type cell wall;GO:0005576//extracellular region	GO:0043169//cation binding;GO:0004565//beta-galactosidase activity;GO:0030246//carbohydrate binding	GO:0042744//hydrogen peroxide catabolic process;GO:0048767//root hair elongation;GO:0032880//regulation of protein localization;GO:0005975//carbohydrate metabolic process	gi|460392491|ref|XP_004241849.1|/0/PREDICTED: beta-galactosidase-like [Solanum lycopersicum]
Solyc10g045240	1094.34	2321.13	1.08477	0.00118501	0.0229768	K01188|1|6e-173|605|sbi:SORBI_06g019840|beta-glucosidase [EC:3.2.1.21]	-	GO:0004553//hydrolase activity, hydrolyzing O-glycosyl compounds	GO:0005975//carbohydrate metabolic process	gi|460406763|ref|XP_004248829.1|/0/PREDICTED: vicianin hydrolase-like [Solanum lycopersicum]
Solyc02g088220	240.434	509.703	1.08402	0.00263937	0.0418979	-	-	-	-	gi|460372793|ref|XP_004232209.1|/0/PREDICTED: phosphate transporter PHO1 homolog 9-like [Solanum lycopersicum]
Solyc11g012870	645.928	1368.64	1.0833	0.00162403	0.0291471	K13473|1|4e-29|127|osa:4331523|chitin elicitor-binding protein;K13429|3|2e-09|62.0|vvi:100255092|chitin elicitor receptor kinase 1	GO:0046658//anchored to plasma membrane	GO:0042834//peptidoglycan binding	GO:0016998//cell wall macromolecule catabolic process;GO:0009909//regulation of flower development;GO:0048449//floral organ formation;GO:0042545//cell wall modification;GO:0006955//immune response;GO:0016570//histone modification;GO:0009664//plant-type cell wall organization	gi|460409774|ref|XP_004250313.1|/0/PREDICTED: lysM domain-containing GPI-anchored protein 1-like [Solanum lycopersicum]
Solyc06g061200	1228.38	2597.15	1.08017	0.00112555	0.0221137	K01115|1|1e-58|224|vcn:VOLCADRAFT_99471|phospholipase D [EC:3.1.4.4];K14709|5|4e-58|223|vcn:VOLCADRAFT_104214|solute carrier family 39 (zinc transporter), member 1/2/3	-	-	-	gi|32479346|gb|AAP83840.1|/0/glycine-rich protein TomR2 [Solanum lycopersicum]
Solyc02g068680	1291.5	2729.01	1.07932	0.00123209	0.0237033	-	-	-	-	gi|460366998|ref|XP_004229362.1|/1.29231e-40/PREDICTED: uncharacterized protein LOC101255237 [Solanum lycopersicum]
Solyc07g049550	218.063	460.601	1.07878	0.00278135	0.0433933	K05933|1|3e-157|552|vvi:100232928|aminocyclopropanecarboxylate oxidase [EC:1.14.17.4]	-	GO:0046872//metal ion binding;GO:0031418//L-ascorbic acid binding;GO:0009815//1-aminocyclopropane-1-carboxylate oxidase activity;GO:0016706//oxidoreductase activity, acting on paired donors, with incorporation or reduction of molecular oxygen, 2-oxoglutarate as one donor, and incorporation of one atom each of oxygen into both donors	GO:0009693//ethylene biosynthetic process;GO:0009835//fruit ripening;GO:0055114//oxidation-reduction process	gi|350535240|ref|NP_001233928.1|/0/1-aminocyclopropane-1-carboxylate oxidase 4 [Solanum lycopersicum]
Solyc09g010860	1037.3	2189.55	1.0778	0.00138657	0.0259337	-	GO:0005576//extracellular region;GO:0016020//membrane	-	GO:0009831//plant-type cell wall modification involved in multidimensional cell growth;GO:0009828//plant-type cell wall loosening;GO:0009739//response to gibberellin stimulus;GO:0009826//unidimensional cell growth;GO:0010114//response to red light;GO:0006949//syncytium formation	gi|350538315|ref|NP_001234081.1|/8.68184e-159/expansin A4 precursor [Solanum lycopersicum]
Solyc03g114950	1043.26	2201.93	1.07766	0.00128869	0.0245226	K05657|1|0.0|840|smo:SELMODRAFT_445846|ATP-binding cassette, subfamily B (MDR/TAP), member 10;K05658|2|2e-105|381|ppp:PHYPADRAFT_170613|ATP-binding cassette, subfamily B (MDR/TAP), member 1	GO:0000325//plant-type vacuole;GO:0005774//vacuolar membrane;GO:0043190//ATP-binding cassette (ABC) transporter complex;GO:0016021//integral to membrane;GO:0005886//plasma membrane	GO:0008559//xenobiotic-transporting ATPase activity;GO:0015421//oligopeptide-transporting ATPase activity;GO:0005524//ATP binding	GO:0035672//oligopeptide transmembrane transport;GO:0010044//response to aluminum ion;GO:0006200//ATP catabolic process	gi|460380639|ref|XP_004236062.1|/0/PREDICTED: ABC transporter B family member 25-like [Solanum lycopersicum]
Solyc12g096960	223.695	471.84	1.07677	0.00291686	0.0451585	-	-	-	GO:0050896//response to stimulus	gi|460415348|ref|XP_004253021.1|/1.30173e-87/PREDICTED: pathogenesis-related protein STH-2-like [Solanum lycopersicum]
Solyc04g057830	391.856	824.826	1.07377	0.00178305	0.0312928	-	-	-	-	gi|462409043|gb|EMJ14377.1|/4.42612e-68/hypothetical protein PRUPE_ppa027036mg [Prunus persica]
Solyc01g110130	357.083	749.975	1.07058	0.00247946	0.0398311	K02212|1|0.0|1408|vvi:100262415|minichromosome maintenance protein 4 (cell division control protein 54)	GO:0005829//cytosol;GO:0042555//MCM complex;GO:0005634//nucleus	GO:0008094//DNA-dependent ATPase activity;GO:0003677//DNA binding;GO:0005524//ATP binding;GO:0003678//DNA helicase activity	GO:0007000//nucleolus organization;GO:0006275//regulation of DNA replication;GO:0000911//cytokinesis by cell plate formation;GO:0051567//histone H3-K9 methylation;GO:0006268//DNA unwinding involved in replication;GO:0008283//cell proliferation;GO:0006342//chromatin silencing;GO:0006306//DNA methylation;GO:0051726//regulation of cell cycle;GO:0009165//nucleotide biosynthetic process;GO:0009909//re…	gi|460370042|ref|XP_004230864.1|/0/PREDICTED: DNA replication licensing factor mcm4-like [Solanum lycopersicum]
Solyc09g082710	315.056	661.626	1.07041	0.00220721	0.0366093	K11251|1|4e-67|251|aly:ARALYDRAFT_888122|histone H2A	GO:0000786//nucleosome;GO:0005730//nucleolus	GO:0003677//DNA binding;GO:0046982//protein heterodimerization activity	GO:0001510//RNA methylation;GO:0006334//nucleosome assembly;GO:0008283//cell proliferation	gi|460404263|ref|XP_004247603.1|/1.11222e-73/PREDICTED: probable histone H2AXb-like [Solanum lycopersicum]
Solyc09g010840	546.033	1146.63	1.07034	0.00160762	0.0289933	K09422|1|4e-170|595|vvi:100256209|myb proto-oncogene protein, plant	GO:0005730//nucleolus;GO:0000793//condensed chromosome	GO:0003677//DNA binding;GO:0042803//protein homodimerization activity;GO:0003682//chromatin binding	GO:0009615//response to virus;GO:0009944//polarity specification of adaxial/abaxial axis;GO:0009753//response to jasmonic acid stimulus;GO:0010338//leaf formation;GO:0009739//response to gibberellin stimulus;GO:0009651//response to salt stress;GO:0042742//defense response to bacterium;GO:0009751//response to salicylic acid stimulus;GO:0009733//response to auxin stimulus;GO:0008356//asymmetric cel…	gi|350537021|ref|NP_001234276.1|/0/phantastica [Solanum lycopersicum]
Solyc01g065530	2707.79	5671.02	1.06649	0.00127317	0.0242831	-	GO:0009506//plasmodesma;GO:0005768//endosome;GO:0046658//anchored to plasma membrane;GO:0005802//trans-Golgi network;GO:0005783//endoplasmic reticulum;GO:0005794//Golgi apparatus	-	GO:0048767//root hair elongation;GO:0009932//cell tip growth;GO:0048527//lateral root development	gi|460366832|ref|XP_004229282.1|/0/PREDICTED: COBRA-like protein 7-like [Solanum lycopersicum]
Solyc01g008620	1166.08	2437.53	1.06375	0.00146411	0.0270422	-	GO:0005615//extracellular space	GO:0042973//glucan endo-1,3-beta-D-glucosidase activity	GO:0005975//carbohydrate metabolic process;GO:0006952//defense response	gi|350539834|ref|NP_001234798.1|/0/glucan endo-1,3-beta-glucosidase A precursor [Solanum lycopersicum]
Solyc02g090110	666.131	1392.08	1.06336	0.00180434	0.0315916	K05658|1|1e-55|216|vvi:100262734|ATP-binding cassette, subfamily B (MDR/TAP), member 1;K04733|2|2e-55|215|smo:SELMODRAFT_159261|interleukin-1 receptor-associated kinase 4 [EC:2.7.11.1];K00924|3|6e-55|214|aly:ARALYDRAFT_486409|[EC:2.7.1.-]	-	GO:0016491//oxidoreductase activity;GO:0004672//protein kinase activity;GO:0000166//nucleotide binding	GO:0016310//phosphorylation	gi|460372512|ref|XP_004232073.1|/0/PREDICTED: WAK-like kinase [Solanum lycopersicum]
Solyc06g035700	754.147	1575.99	1.06334	0.00162338	0.0291471	K09286|1|4e-35|145|ath:AT4G25490|EREBP-like factor	-	-	GO:0006355//regulation of transcription, DNA-dependent;GO:0050832//defense response to fungus	gi|460390231|ref|XP_004240742.1|/2.38448e-100/PREDICTED: ethylene-responsive transcription factor ERF025-like [Solanum lycopersicum]
Solyc03g033770	328.555	683.655	1.05713	0.00247815	0.0398311	K08900|1|2e-07|52.4|pop:POPTR_550987|mitochondrial chaperone BCS1;K13120|2|5e-06|47.4|vvi:100263357|protein FAM32A	GO:0005739//mitochondrion	-	GO:0052542//defense response by callose deposition;GO:0009611//response to wounding;GO:0009627//systemic acquired resistance;GO:0010200//response to chitin;GO:0009697//salicylic acid biosynthetic process;GO:0009612//response to mechanical stimulus	gi|460377537|ref|XP_004234548.1|/6.42873e-13/PREDICTED: probable mitochondrial chaperone BCS1-A-like [Solanum lycopersicum]
Solyc02g090490	2725.16	5668.86	1.05672	0.00143316	0.0266034	-	-	-	-	gi|460372466|ref|XP_004232051.1|/0/PREDICTED: patatin group A-3-like [Solanum lycopersicum]
Solyc07g056000	2950.29	6134.95	1.0562	0.00142496	0.0264955	K08235|1|9e-111|397|pop:POPTR_711461|xyloglucan:xyloglucosyl transferase [EC:2.4.1.207];K14504|3|6e-110|395|vvi:100256520|xyloglucan:xyloglucosyl transferase TCH4 [EC:2.4.1.207]	GO:0048046//apoplast;GO:0005618//cell wall	GO:0004553//hydrolase activity, hydrolyzing O-glycosyl compounds;GO:0016762//xyloglucan:xyloglucosyl transferase activity	GO:0006073//cellular glucan metabolic process	gi|350535681|ref|NP_001234207.1|/1.39875e-168/xyloglycan endo-transglycosylase precursor [Solanum lycopersicum]
Solyc11g007130	1918.41	3984.83	1.0546	0.00148374	0.0272687	-	GO:0016023//cytoplasmic membrane-bounded vesicle;GO:0016021//integral to membrane;GO:0005886//plasma membrane	GO:0005215//transporter activity	GO:0055085//transmembrane transport	gi|460409100|ref|XP_004249978.1|/0/PREDICTED: hippocampus abundant transcript-like protein 1-like [Solanum lycopersicum]
Solyc11g005150	799.03	1657	1.05225	0.00220945	0.0366093	K14709|1|4e-50|197|vcn:VOLCADRAFT_104214|solute carrier family 39 (zinc transporter), member 1/2/3;K01115|5|7e-43|173|vcn:VOLCADRAFT_99471|phospholipase D [EC:3.1.4.4]	GO:0009506//plasmodesma;GO:0009505//plant-type cell wall	GO:0005515//protein binding;GO:0003824//catalytic activity	GO:0048767//root hair elongation;GO:0048527//lateral root development;GO:0009826//unidimensional cell growth;GO:0000904//cell morphogenesis involved in differentiation	gi|460408850|ref|XP_004249854.1|/0/PREDICTED: leucine-rich repeat extensin-like protein 1 [Solanum lycopersicum]
Solyc07g007050	313.567	650.117	1.05193	0.00270011	0.0425445	-	-	-	-	gi|460412773|ref|XP_004251772.1|/6.4919e-37/PREDICTED: uncharacterized protein LOC101248846 [Solanum lycopersicum]
Solyc09g074280	954.197	1978.24	1.05186	0.00162277	0.0291471	K06694|1|4e-25|114|zma:100284046|26S proteasome non-ATPase regulatory subunit 10	-	-	-	gi|460404150|ref|XP_004247547.1|/0/PREDICTED: serine/threonine-protein phosphatase 6 regulatory ankyrin repeat subunit C-like [Solanum lycopersicum]
Solyc03g111720	670.534	1388.45	1.05009	0.00221295	0.0366093	K07304|1|1e-89|327|vvi:100255310|peptide-methionine (S)-S-oxide reductase [EC:1.8.4.11]	GO:0009570//chloroplast stroma	GO:0008113//peptide-methionine-(S)-S-oxide reductase activity	GO:0034599//cellular response to oxidative stress;GO:0055114//oxidation-reduction process;GO:0080167//response to karrikin	gi|1709692|sp|P54153.1|MSRA_SOLLC/1.26557e-114/RecName: Full=Peptide methionine sulfoxide reductase; AltName: Full=Fruit-ripening protein E4; AltName: Full=Peptide-methionine (S)-S-oxide reductase; Short=Peptide Met(O) reductase; AltName: Full=Protein-methionine-S-oxide reductase
Solyc02g092550	1324.15	2739.53	1.04886	0.00153681	0.0280812	K01955|1|4e-07|53.1|vvi:100262205|carbamoyl-phosphate synthase large subunit [EC:6.3.5.5]	-	-	GO:0006807//nitrogen compound metabolic process;GO:0060776//simple leaf morphogenesis	gi|460372183|ref|XP_004231911.1|/5.21349e-126/PREDICTED: LOB domain-containing protein 37-like [Solanum lycopersicum]
Solyc01g009160	2137.2	4419.53	1.04817	0.00165424	0.0295208	-	GO:0009506//plasmodesma;GO:0044464//cell part	-	-	gi|460365156|ref|XP_004228470.1|/2.15847e-149/PREDICTED: protein NDR1-like [Solanum lycopersicum]
Solyc06g050440	463.703	957.493	1.04606	0.00236897	0.0386149	K00430|1|7e-141|498|gmx:100803637|peroxidase [EC:1.11.1.7]	GO:0048046//apoplast;GO:0005618//cell wall	GO:0020037//heme binding;GO:0046872//metal ion binding;GO:0004601//peroxidase activity	GO:0055114//oxidation-reduction process;GO:0006979//response to oxidative stress	gi|460390532|ref|XP_004240883.1|/0/PREDICTED: peroxidase 4-like [Solanum lycopersicum]
Solyc03g119210	343.53	708.631	1.0446	0.00330881	0.0494672	-	-	-	-	gi|460380176|ref|XP_004235834.1|/8.03512e-48/PREDICTED: probable non-specific lipid-transfer protein AKCS9-like [Solanum lycopersicum]
Solyc03g121620	1165.79	2402.59	1.04328	0.00203728	0.0346322	-	GO:0009506//plasmodesma;GO:0005886//plasma membrane	-	-	gi|460379694|ref|XP_004235596.1|/3.04171e-151/PREDICTED: uncharacterized protein LOC101266204 [Solanum lycopersicum]
Solyc10g086660	737.292	1516.66	1.04059	0.00221127	0.0366093	-	-	GO:0005089//Rho guanyl-nucleotide exchange factor activity	-	gi|460408295|ref|XP_004249581.1|/0/PREDICTED: rop guanine nucleotide exchange factor 1-like [Solanum lycopersicum]
Solyc11g010500	12059.9	24803.5	1.04033	0.00160906	0.0289958	K15104|1|1e-153|540|rcu:RCOM_0070090|solute carrier family 25 (mitochondrial oxoglutarate transporter), member 11	GO:0016021//integral to membrane;GO:0031966//mitochondrial membrane	GO:0005310//dicarboxylic acid transmembrane transporter activity	GO:0006835//dicarboxylic acid transport;GO:0055085//transmembrane transport;GO:0006839//mitochondrial transport	gi|460409427|ref|XP_004250140.1|/0/PREDICTED: mitochondrial uncoupling protein 5-like [Solanum lycopersicum]
Solyc01g006300	1662.38	3418.35	1.04005	0.00161551	0.0290648	K00430|1|3e-128|456|vvi:100265513|peroxidase [EC:1.11.1.7]	GO:0005794//Golgi apparatus;GO:0005576//extracellular region	GO:0046872//metal ion binding;GO:0020037//heme binding;GO:0004601//peroxidase activity	GO:0006979//response to oxidative stress;GO:0002215//defense response to nematode;GO:0009908//flower development;GO:0055114//oxidation-reduction process	gi|350539341|ref|NP_001234132.1|/0/peroxidase precursor [Solanum lycopersicum]
Solyc07g063130	511.634	1050.41	1.03776	0.0026402	0.0418979	K08819|1|0.0|651|vvi:100240938|cyclin-dependent kinase 12/13 [EC:2.7.11.22 2.7.11.23]	GO:0005886//plasma membrane;GO:0005634//nucleus	GO:0008353//RNA polymerase II carboxy-terminal domain kinase activity;GO:0005524//ATP binding	GO:0006468//protein phosphorylation;GO:0051301//cell division	gi|460397352|ref|XP_004244231.1|/0/PREDICTED: probable serine/threonine-protein kinase At1g09600-like [Solanum lycopersicum]
Solyc01g091530	3244.94	6661.12	1.03757	0.00166148	0.0295566	K12418|1|5e-11|67.4|cre:CHLREDRAFT_32523|fatty acid desaturase (delta-4 desaturase) [EC:1.14.19.-];K01115|2|8e-06|50.1|vcn:VOLCADRAFT_99471|phospholipase D [EC:3.1.4.4]	GO:0009505//plant-type cell wall;GO:0046658//anchored to plasma membrane;GO:0048046//apoplast	-	GO:0007389//pattern specification process;GO:0008361//regulation of cell size;GO:0009664//plant-type cell wall organization;GO:0009926//auxin polar transport;GO:0010015//root morphogenesis;GO:0009832//plant-type cell wall biogenesis;GO:0040007//growth	gi|460367940|ref|XP_004229828.1|/0/PREDICTED: fasciclin-like arabinogalactan protein 10-like [Solanum lycopersicum]
Solyc03g082370	9088.78	18650.8	1.03708	0.00150944	0.0276722	-	-	-	-	gi|460378517|ref|XP_004235017.1|/5.46011e-44/PREDICTED: uncharacterized protein LOC101248276 [Solanum lycopersicum]
Solyc09g011600	800.605	1642.68	1.03689	0.00195229	0.0335588	K00799|1|3e-64|242|vvi:100242547|glutathione S-transferase [EC:2.5.1.18]	-	GO:0016740//transferase activity	-	gi|350536817|ref|NP_001234778.1|/2.83184e-124/glutathione S-transferase-like protein [Solanum lycopersicum]
Solyc02g082930	671.446	1374.98	1.03406	0.00240303	0.0389129	K01183|1|2e-95|346|gmx:547572|chitinase [EC:3.2.1.14]	GO:0005615//extracellular space	GO:0004568//chitinase activity;GO:0008061//chitin binding	GO:0006032//chitin catabolic process;GO:0006952//defense response;GO:0009607//response to biotic stimulus;GO:0000272//polysaccharide catabolic process;GO:0016998//cell wall macromolecule catabolic process	gi|350534512|ref|NP_001234400.1|/2.57045e-146/acidic 27 kDa endochitinase precursor [Solanum lycopersicum]
Solyc01g112260	1323.15	2703.06	1.03062	0.00181202	0.031699	-	-	-	-	gi|460370529|ref|XP_004231105.1|/1.80818e-85/PREDICTED: uncharacterized protein LOC101258903 [Solanum lycopersicum]
Solyc05g054320	954.93	1948.62	1.02899	0.00218539	0.0363158	-	-	GO:0016787//hydrolase activity	GO:0008152//metabolic process	gi|460388298|ref|XP_004239805.1|/0/PREDICTED: bifunctional epoxide hydrolase 2-like [Solanum lycopersicum]
Solyc06g074530	5284.73	10765	1.02645	0.00194673	0.0335203	K05359|1|0.0|702|vvi:100267022|arogenate/prephenate dehydratase [EC:4.2.1.91 4.2.1.51]	GO:0009507//chloroplast;GO:0005829//cytosol	GO:0047769//arogenate dehydratase activity;GO:0004664//prephenate dehydratase activity	GO:0006571//tyrosine biosynthetic process;GO:0009094//L-phenylalanine biosynthetic process;GO:0080167//response to karrikin;GO:0010244//response to low fluence blue light stimulus by blue low-fluence system	gi|460391391|ref|XP_004241304.1|/0/PREDICTED: arogenate dehydratase/prephenate dehydratase 6, chloroplastic-like [Solanum lycopersicum]
Solyc01g094940	540.019	1099.75	1.02609	0.00272407	0.0427707	K04733|1|1e-78|291|smo:SELMODRAFT_159261|interleukin-1 receptor-associated kinase 4 [EC:2.7.11.1];K13430|4|2e-74|278|rcu:RCOM_1078760|serine/threonine-protein kinase PBS1 [EC:2.7.11.1]	GO:0005634//nucleus;GO:0005886//plasma membrane	GO:0004713//protein tyrosine kinase activity;GO:0005524//ATP binding;GO:0004709//MAP kinase kinase kinase activity	GO:0009741//response to brassinosteroid stimulus;GO:0000186//activation of MAPKK activity	gi|460368073|ref|XP_004229894.1|/0/PREDICTED: probable serine/threonine-protein kinase At1g01540-like isoform 1 [Solanum lycopersicum]
Solyc09g010980	806.019	1641.07	1.02575	0.0023011	0.037814	-	-	-	-	gi|359482099|ref|XP_002270890.2|/3.48482e-06/PREDICTED: laccase-17-like [Vitis vinifera]
Solyc01g079940	4346.02	8831.3	1.02293	0.00174159	0.0307744	K00924|1|2e-09|62.4|ath:AT5G22850|[EC:2.7.1.-]	-	-	-	gi|460367134|ref|XP_004229430.1|/0/PREDICTED: basic 7S globulin-like [Solanum lycopersicum]
Solyc03g112330	301.508	612.649	1.02287	0.00330505	0.0494444	-	-	-	-	gi|460381035|ref|XP_004236258.1|/5.965e-122/PREDICTED: U-box domain-containing protein 36-like [Solanum lycopersicum]
Solyc04g008100	814.153	1651.5	1.0204	0.00236483	0.0385757	-	GO:0000151//ubiquitin ligase complex	GO:0004842//ubiquitin-protein ligase activity	GO:0016567//protein ubiquitination;GO:0032491//detection of molecule of fungal origin	gi|460382392|ref|XP_004236923.1|/0/PREDICTED: U-box domain-containing protein 21-like [Solanum lycopersicum]
Solyc09g082810	2641.84	5341.14	1.0156	0.00210683	0.0353943	K01115|1|5e-32|134|vcn:VOLCADRAFT_99471|phospholipase D [EC:3.1.4.4]	-	-	-	gi|350539900|ref|NP_001234057.1|/3.60714e-75/glycine-rich protein [Solanum lycopersicum]
Solyc07g064240	1686.49	3404.41	1.01338	0.00221251	0.0366093	-	GO:0031225//anchored to membrane	-	-	gi|460397180|ref|XP_004244146.1|/8.32348e-124/PREDICTED: early nodulin-like protein 2-like [Solanum lycopersicum]
Solyc03g078640	816.274	1647.61	1.01325	0.00262544	0.0417831	K11294|1|1e-06|53.1|aly:ARALYDRAFT_479366|nucleolin	GO:0005802//trans-Golgi network;GO:0005794//Golgi apparatus;GO:0005768//endosome	-	-	gi|460378599|ref|XP_004235057.1|/0/PREDICTED: uncharacterized protein LOC101260800 [Solanum lycopersicum]
Solyc06g076070	841.255	1695.62	1.0112	0.00262195	0.0417575	-	-	-	-	-
Solyc05g009650	936.676	1886.63	1.01019	0.00217119	0.036161	-	-	-	-	gi|460386528|ref|XP_004238950.1|/6.92242e-76/PREDICTED: uncharacterized protein LOC101261228 [Solanum lycopersicum]
Solyc02g084710	498.093	1002.65	1.00933	0.00305344	0.0467191	K03671|1|6e-50|193|vvi:100253934|thioredoxin 1	GO:0005737//cytoplasm	GO:0016671//oxidoreductase activity, acting on a sulfur group of donors, disulfide as acceptor;GO:0009055//electron carrier activity;GO:0015035//protein disulfide oxidoreductase activity	GO:0045454//cell redox homeostasis;GO:0006662//glycerol ether metabolic process;GO:0022900//electron transport chain	gi|460373276|ref|XP_004232447.1|/3.91571e-63/PREDICTED: thioredoxin H-type 2-like [Solanum lycopersicum]
Solyc04g079860	1351.54	2716.99	1.00741	0.0027241	0.0427707	K13648|1|3e-22|103|pop:POPTR_581394|alpha-1,4-galacturonosyltransferase [EC:2.4.1.43]	GO:0005783//endoplasmic reticulum	GO:0016757//transferase activity, transferring glycosyl groups	GO:0032504//multicellular organism reproduction;GO:0010417//glucuronoxylan biosynthetic process;GO:0052386//cell wall thickening;GO:0010051//xylem and phloem pattern formation;GO:0048366//leaf development	gi|460385050|ref|XP_004238218.1|/0/PREDICTED: probable galacturonosyltransferase-like 2-like [Solanum lycopersicum]

## Sheet: downregulated
Supplementary Table S1. Differentially expressed genes (Deseq)
id	baseMean (LF)	baseMean (AG)	log2FoldChange（AG/LF）	p-value	padj	KEGG.Orthology	GO.Component	GO.Function	GO.Process	Blast.nr
Solyc07g062700	137097	68540.9	-1.00016	0.00207275	0.0350008	K07300|1|2e-06|52.8|osa:4333044|Ca2+:H+ antiporter	GO:0016021//integral to membrane;GO:0000325//plant-type vacuole;GO:0009506//plasmodesma;GO:0005774//vacuolar membrane;GO:0009507//chloroplast;GO:0005886//plasma membrane	GO:0005509//calcium ion binding	GO:0055085//transmembrane transport;GO:0042744//hydrogen peroxide catabolic process;GO:0007030//Golgi organization;GO:0007033//vacuole organization	gi|460397404|ref|XP_004244257.1|/0/PREDICTED: uncharacterized protein LOC101263533 [Solanum lycopersicum]
Solyc12g049400	2293.64	1145.35	-1.00185	0.00278438	0.0434102	K13464|1|6e-27|118|rcu:RCOM_0684970|jasmonate ZIM domain-containing protein	-	-	-	gi|460414089|ref|XP_004252407.1|/1.49703e-110/PREDICTED: protein TIFY 10A-like [Solanum lycopersicum]
Solyc03g117590	36144.5	17996	-1.0061	0.00231735	0.0379966	K09510|1|2e-08|56.2|bdi:100830840|DnaJ homolog subfamily B member 4;K09517|2|4e-08|55.5|pop:POPTR_572634|DnaJ homolog subfamily B member 11;K03686|3|7e-08|54.7|gmx:100811006|molecular chaperone DnaJ;K09519|5|7e-08|54.7|sbi:SORBI_09g002340|DnaJ homolog subfamily B member 13	GO:0009570//chloroplast stroma;GO:0005634//nucleus	GO:0005515//protein binding	GO:0006457//protein folding;GO:0006950//response to stress;GO:0009416//response to light stimulus	gi|350539992|ref|NP_001233835.1|/1.82611e-92/heat shock protein binding protein [Solanum lycopersicum]
Solyc02g092260	1052.71	523.834	-1.00693	0.00318779	0.0481116	K14682|1|0.0|841|vvi:100259394|amino-acid N-acetyltransferase [EC:2.3.1.1]	GO:0005737//cytoplasm	GO:0003991//acetylglutamate kinase activity;GO:0004042//acetyl-CoA:L-glutamate N-acetyltransferase activity	GO:0006526//arginine biosynthetic process	gi|460372227|ref|XP_004231933.1|/0/PREDICTED: amino-acid acetyltransferase-like [Solanum lycopersicum]
Solyc06g005190	1435.74	714.286	-1.00723	0.00295157	0.0455055	K10643|1|0.0|972|vvi:100267264|CCR4-NOT transcription complex subunit 4 [EC:6.3.2.19]	GO:0009506//plasmodesma	GO:1901363;GO:0097159//organic cyclic compound binding	GO:0044237//cellular metabolic process	gi|460389400|ref|XP_004240343.1|/0/PREDICTED: uncharacterized protein LOC101247127 [Solanum lycopersicum]
Solyc03g117360	7931.9	3939.97	-1.00948	0.00194771	0.0335203	K14558|1|2e-70|266|aly:ARALYDRAFT_901180|periodic tryptophan protein 2	GO:0005829//cytosol;GO:0005634//nucleus	GO:0042803//protein homodimerization activity	GO:0009867//jasmonic acid mediated signaling pathway;GO:0010072//primary shoot apical meristem specification;GO:0010051//xylem and phloem pattern formation;GO:0009733//response to auxin stimulus;GO:0045892//negative regulation of transcription, DNA-dependent	gi|460381430|ref|XP_004236452.1|/0/PREDICTED: protein TOPLESS-like [Solanum lycopersicum]
Solyc08g023440	3938.57	1950.89	-1.01354	0.00225459	0.037215	K03021|1|2e-12|72.8|ota:Ot01g06000|DNA-directed RNA polymerase III subunit RPC2 [EC:2.7.7.6]	GO:0009941//chloroplast envelope;GO:0009506//plasmodesma;GO:0016023//cytoplasmic membrane-bounded vesicle;GO:0005886//plasma membrane;GO:0005774//vacuolar membrane;GO:0005576//extracellular region	-	-	gi|460398637|ref|XP_004244862.1|/0/PREDICTED: uncharacterized membrane protein C24H6.13-like [Solanum lycopersicum]
[truncated: 409 more rows]
