# Supplementary material for: Functional Analysis and RNA Sequencing Indicate the Regulatory Role of Argonaute1 in Tomato Compound Leaf Development
Source: PLoS One. 2015 Oct 19;10(10):e0140756. doi: 10.1371/journal.pone.0140756 (PMC4610667; doi:10.1371/journal.pone.0140756)
Supplement: S2 Table — (XLSX) [file pone.0140756.s005.xlsx]

## Sheet: orthologous genes
Supplementary Table S2. Ortholous genes from tomato, Arabidopsis, rice and maize
Tomato	Arabidopsis	Rice	Maize
ARF4[25]	ARF4 [26]	ARF4	ARF4 [57]
NPR5	BOP1 [27]	NPR1	NPR5
ATHB15-like(CNA)	CNA [42]	HOX29 [54]	RLD1 [58]
ATHB14-like(PHV)	PHV [43]	HOX32 [54]	RLD1 [58]
REV [17]	REV [44]	HOX9 [54]	RLD1 [58]
IAA15 [30]	IAA17 [51]	IAA11	IAA17
GAI	GAI [29]	GAI [55]	DWARF8 [59]
AUX1	AUX1 [52]	AUX1 [56]	AUX1
GID1	GID1B [53]	GID1 [55]	GID1 [59]
17. Hendelman A,et al. Planta. 2013;237(1):363-77.
25. Yifhar T, et al. Plant Cell. 2012;24(9):3575-89.
26. Pekker I, et al. Plant Cell. 2005;17(11):2899-910.
27. Ha CM,et al. Plant Cell. 2007;19(6):1809-25.
29. Gan Y, et al. Plant Physiol. 2007;145(3):1031-42.
30. Deng W, et al. New Phytol. 2012;194(2):379-90.
42. Ochando I, et al. Plant Physiol. 2006;141(2):607-19.
43. McConnell JR, et al. Nature. 2001;411(6838):709-13.
44. Emery JF, et al. Curr Biol. 2003;13(20):1768-74.
51. Yang F, et al. J Integr Plant Biol. 2014;56(7):635-47.
52. Timpte C, et al. Plant J. 1995 ;8(4):561-9.
53. Hauvermale AL, et al. Plant Cell Physiol. 2015 ;56(9):1773-85.
54. Itoh J, et al. Plant Physiol. 2008 ;147(4):1960-75.
55. Yamamoto Y, et al. Plant Cell. 2010;22(11):3589-602.
56. Zhao H, et al. Plant Cell Environ. 2014;13. [Epub ahead of print]
57. Nogueira FTs, et al. Plant Signal Behav. 2007;2(6):519-21.
58. Michelle T, et al. Nature. 2004; 428: 84-8.
59. Lawit SJ, et al. Plant Cell Physiol. 2010;51(11):1854-68.
